# Supplementary material for: Age- and Stage-Dependent Prostate Cancer Aggressiveness Associated with Differential Notch Signaling
Source: MDPI journal article supplement (doi:10.3390/ijms24010164), 2022-12-22
Supplement: s1 [file s1]

Supplementary File S3. The ExpressCluster analysis of unique and common expression profiles among the downstream targets of Notch signaling.

I - TCGA data

|  | early_above_70 | early_aged_60_70 | early_below_55 | late_above_70 | late_aged_60_70 | late_below_55 | Probe ID | Descripti... | Correlation |
|--|----------------|------------------|----------------|---------------|-----------------|---------------|----------|--------------|-------------|
|  |                |                  |                |               |                 |               | ADD3     |              | 0.97181     |
|  |                |                  |                |               |                 |               | APPL2    |              | 0.98714     |
|  |                |                  |                |               |                 |               | ARHGAP5  |              | 0.96644     |
|  |                |                  |                |               |                 |               | ATP11A   |              | 0.91187     |
|  |                |                  |                |               |                 |               | ATP6V1A  |              | 0.96865     |
|  |                |                  |                |               |                 |               | BCL2L11  |              | 0.94849     |
|  |                |                  |                |               |                 |               | CAMSAP2  |              | 0.97594     |
|  |                |                  |                |               |                 |               | CLINT1   |              | 0.92067     |
|  |                |                  |                |               |                 |               | DCUN1D1  |              | 0.97113     |
|  |                |                  |                |               |                 |               | EEA1     |              | 0.97924     |
|  |                |                  |                |               |                 |               | EFR3B    |              | 0.92157     |
|  |                |                  |                |               |                 |               | ENPP4    |              | 0.96108     |
|  |                |                  |                |               |                 |               | HBP1     |              | 0.95812     |
|  |                |                  |                |               |                 |               | HCFC2    |              | 0.93946     |
|  |                |                  |                |               |                 |               | HERC3    |              | 0.97717     |
|  |                |                  |                |               |                 |               | INVS     |              | 0.97105     |
|  |                |                  |                |               |                 |               | KPNB1    |              | 0.91854     |
|  |                |                  |                |               |                 |               | MSI2     |              | 0.94072     |
|  |                |                  |                |               |                 |               | NAA50    |              | 0.85992     |
|  |                |                  |                |               |                 |               | NEK7     |              | 0.98948     |
|  |                |                  |                |               |                 |               | ORC4     |              | 0.85088     |
|  |                |                  |                |               |                 |               | PANK3    |              | 0.98444     |
|  |                |                  |                |               |                 |               | PDHX     |              | 0.93406     |
|  |                |                  |                |               |                 |               | PPP2R5E  |              | 0.94016     |
|  |                |                  |                |               |                 |               | PRSS3    |              | 0.86419     |
|  |                |                  |                |               |                 |               | RAP1A    |              | 0.95686     |
|  |                |                  |                |               |                 |               | RB1      |              | 0.96243     |
|  |                |                  |                |               |                 |               | RB1CC1   |              | 0.96603     |
|  |                |                  |                |               |                 |               | RDX      |              | 0.95899     |
|  |                |                  |                |               |                 |               | RECQL    |              | 0.95796     |
|  |                |                  |                |               |                 |               | RNF38    |              | 0.95897     |
|  |                |                  |                |               |                 |               | SHOC2    |              | 0.98962     |
|  |                |                  |                |               |                 |               | SPTLC1   |              | 0.99625     |
|  |                |                  |                |               |                 |               | TBC1D23  |              | 0.97899     |
|  |                |                  |                |               |                 |               | TPD52    |              | 0.91848     |
|  |                |                  |                |               |                 |               | TULP2    |              | 0.70590     |
|  |                |                  |                |               |                 |               | AMOTL1   |              | 0.95136     |
|  |                |                  |                |               |                 |               | BROX     |              | 0.98263     |
|  |                |                  |                |               |                 |               | GIMAP5   |              | 0.84710     |
|  |                |                  |                |               |                 |               | ARFGEF1  |              | 0.95418     |
|  |                |                  |                |               |                 |               | BTAF1    |              | 0.90947     |
|  |                |                  |                |               |                 |               | CMTM6    |              | 0.96450     |
|  |                |                  |                |               |                 |               | EXOC2    |              | 0.99017     |
|  |                |                  |                |               |                 |               | FGL1     |              | 0.70590     |
|  |                |                  |                |               |                 |               | GATA1    |              | 0.84731     |
|  |                |                  |                |               |                 |               | GOLGA4   |              | 0.97765     |
|  |                |                  |                |               |                 |               | GSTCD    |              | 0.94569     |
|  |                |                  |                |               |                 |               | HIF1A    |              | 0.95830     |
|  |                |                  |                |               |                 |               | HOXA6    |              | 0.89214     |
|  |                |                  |                |               |                 |               | HOXC8    |              | 0.70590     |
|  |                |                  |                |               |                 |               | MPP4     |              | 0.86316     |
|  |                |                  |                |               |                 |               | MYO7A    |              | 0.92219     |
|  |                |                  |                |               |                 |               | NBN      |              | 0.89372     |
|  |                |                  |                |               |                 |               | OSBPL11  |              | 0.97574     |
|  |                |                  |                |               |                 |               | PPP1R12A |              | 0.94402     |
|  |                |                  |                |               |                 |               | PROX1    |              | 0.70590     |
|  |                |                  |                |               |                 |               | R3HDM1   |              | 0.90445     |
|  |                |                  |                |               |                 |               | SCGB1A1  |              | 0.70590     |
|  |                |                  |                |               |                 |               | SLC26A7  |              | 0.84587     |
|  |                |                  |                |               |                 |               | SPINK2   |              | 0.86100     |
|  |                |                  |                |               |                 |               | SPOPL    |              | 0.90489     |
|  |                |                  |                |               |                 |               | SRPK2    |              | 0.83750     |
|  |                |                  |                |               |                 |               | TMOD3    |              | 0.97639     |
|  |                |                  |                |               |                 |               | UBQLN1   |              | 0.97871     |
|  |                |                  |                |               |                 |               | VRK2     |              | 0.99310     |
|  |                |                  |                |               |                 |               | WDR44    |              | 0.97964     |
|  |                |                  |                |               |                 |               | WDR47    |              | 0.97322     |
|  |                |                  |                |               |                 |               | PRPF40A  |              | 0.90427     |
|  |                |                  |                |               |                 |               | ORM1     |              | 0.70590     |
|  |                |                  |                |               |                 |               | SLC38A3  |              | 0.87789     |
|  |                |                  |                |               |                 |               | CNGA4    |              | 0.84314     |
|  |                |                  |                |               |                 |               | FANCM    |              | 0.96667     |
|  |                |                  |                |               |                 |               | FRS2     |              | 0.96683     |
|  |                |                  |                |               |                 |               | GFM1     |              | 0.99225     |
|  |                |                  |                |               |                 |               | KCNK4    |              | 0.70590     |
|  |                |                  |                |               |                 |               | KIAA0895 |              | 0.97443     |
|  |                |                  |                |               |                 |               | KIF5A    |              | 0.70590     |
|  |                |                  |                |               |                 |               | MFAP3    |              | 0.92361     |
|  |                |                  |                |               |                 |               | NFXL1    |              | 0.85530     |
|  |                |                  |                |               |                 |               | PHC3     |              | 0.89428     |
|  |                |                  |                |               |                 |               | PTPN11   |              | 0.97565     |
|  |                |                  |                |               |                 |               | REEP3    |              | 0.96568     |
|  |                |                  |                |               |                 |               | RSRC1    |              | 0.96248     |
|  |                |                  |                |               |                 |               | ZFP91    |              | 0.97591     |
|  |                |                  |                |               |                 |               | ZHX1     |              | 0.96097     |

|  | early_above_70 | early_aged_60_70 | early_below_55 | late_above_70 | late_aged_60_70 | late_below_55 | Probe ID | Descripti... | Correlation |
|--|----------------|------------------|----------------|---------------|-----------------|---------------|----------|--------------|-------------|
|  |                |                  |                |               |                 |               | ACSL1    |              | 0.97179     |
|  |                |                  |                |               |                 |               | ARHGAP24 |              | 0.96868     |
|  |                |                  |                |               |                 |               | ARHGAP29 |              | 0.97277     |
|  |                |                  |                |               |                 |               | ATXN3    |              | 0.97985     |
|  |                |                  |                |               |                 |               | BZW1     |              | 0.94224     |
|  |                |                  |                |               |                 |               | CARD8    |              | 0.99101     |
|  |                |                  |                |               |                 |               | DYNC1I2  |              | 0.91077     |
|  |                |                  |                |               |                 |               | EGLN1    |              | 0.98637     |
|  |                |                  |                |               |                 |               | ELF1     |              | 0.97124     |
|  |                |                  |                |               |                 |               | FHDC1    |              | 0.96552     |
|  |                |                  |                |               |                 |               | GNPTAB   |              | 0.92329     |
|  |                |                  |                |               |                 |               | GRAMD1B  |              | 0.96306     |
|  |                |                  |                |               |                 |               | LRCH1    |              | 0.98339     |
|  |                |                  |                |               |                 |               | RAP2A    |              | 0.98241     |
|  |                |                  |                |               |                 |               | RCOR3    |              | 0.98108     |
|  |                |                  |                |               |                 |               | RSBN1    |              | 0.94213     |
|  |                |                  |                |               |                 |               | SEC14L1  |              | 0.92024     |
|  |                |                  |                |               |                 |               | SNX9     |              | 0.93531     |
|  |                |                  |                |               |                 |               | SORL1    |              | 0.98323     |
|  |                |                  |                |               |                 |               | TIAM1    |              | 0.92962     |
|  |                |                  |                |               |                 |               | WDFY2    |              | 0.85342     |
|  |                |                  |                |               |                 |               | HSPA1L   |              | 0.97809     |
|  |                |                  |                |               |                 |               | ALDH1L2  |              | 0.96677     |
|  |                |                  |                |               |                 |               | ALX4     |              | 0.88353     |
|  |                |                  |                |               |                 |               | C2orf49  |              | 0.96131     |
|  |                |                  |                |               |                 |               | CD109    |              | 0.95126     |
|  |                |                  |                |               |                 |               | CDH10    |              | 0.91629     |
|  |                |                  |                |               |                 |               | CYBRD1   |              | 0.97164     |
|  |                |                  |                |               |                 |               | DCAF5    |              | 0.99057     |
|  |                |                  |                |               |                 |               | EML1     |              | 0.91764     |
|  |                |                  |                |               |                 |               | FBXO3    |              | 0.94357     |
|  |                |                  |                |               |                 |               | GRIP1    |              | 0.88621     |
|  |                |                  |                |               |                 |               | KDM6A    |              | 0.91657     |
|  |                |                  |                |               |                 |               | LAMC1    |              | 0.97875     |
|  |                |                  |                |               |                 |               | NID1     |              | 0.97327     |
|  |                |                  |                |               |                 |               | PAPOLG   |              | 0.98859     |
|  |                |                  |                |               |                 |               | PPEF1    |              | 0.95502     |
|  |                |                  |                |               |                 |               | RNF144A  |              | 0.88869     |
|  |                |                  |                |               |                 |               | SPARCL1  |              | 0.96462     |
|  |                |                  |                |               |                 |               | THSD7B   |              | 0.80093     |
|  |                |                  |                |               |                 |               | TMEM154  |              | 0.92540     |
|  |                |                  |                |               |                 |               | ZBTB8A   |              | 0.96146     |
|  |                |                  |                |               |                 |               | C17orf80 |              | 0.97485     |
|  |                |                  |                |               |                 |               | CHM      |              | 0.96434     |
|  |                |                  |                |               |                 |               | CLSTN3   |              | 0.92343     |
|  |                |                  |                |               |                 |               | EIF5A2   |              | 0.98693     |
|  |                |                  |                |               |                 |               | LCK      |              | 0.97395     |
|  |                |                  |                |               |                 |               | LRP1     |              | 0.90196     |
|  |                |                  |                |               |                 |               | MAP3K5   |              | 0.94541     |
|  |                |                  |                |               |                 |               | RYR1     |              | 0.85558     |

|  | early_above_70 | early_aged_60_70 | early_below_55 | late_above_70 | late_aged_60_70 | late_below_55 | Probe ID | Descripti... | Correlation |
|--|----------------|------------------|----------------|---------------|-----------------|---------------|----------|--------------|-------------|
|  |                |                  |                |               |                 |               | ACE2     | 0.93384      |             |
|  |                |                  |                |               |                 |               | ANKRD12  | 0.96662      |             |
|  |                |                  |                |               |                 |               | ANKRD14  | 0.97765      |             |
|  |                |                  |                |               |                 |               | ANKRD15  | 0.91119      |             |
|  |                |                  |                |               |                 |               | ANKRD16  | 0.96842      |             |
|  |                |                  |                |               |                 |               | ANKRD17  | 0.96842      |             |
|  |                |                  |                |               |                 |               | ANKRD18  | 0.97793      |             |
|  |                |                  |                |               |                 |               | ANKRD19  | 0.91629      |             |
|  |                |                  |                |               |                 |               | ANKRD20  | 0.97793      |             |
|  |                |                  |                |               |                 |               | ANKRD21  | 0.97793      |             |
|  |                |                  |                |               |                 |               | ANKRD22  | 0.96277      |             |
|  |                |                  |                |               |                 |               | ANKRD23  | 0.97793      |             |
|  |                |                  |                |               |                 |               | ANKRD24  | 0.97793      |             |
|  |                |                  |                |               |                 |               | ANKRD25  | 0.97793      |             |
|  |                |                  |                |               |                 |               | ANKRD26  | 0.97793      |             |
|  |                |                  |                |               |                 |               | ANKRD27  | 0.97793      |             |
|  |                |                  |                |               |                 |               | ANKRD28  | 0.97793      |             |
|  |                |                  |                |               |                 |               | ANKRD29  | 0.97793      |             |
|  |                |                  |                |               |                 |               | ANKRD30  | 0.97793      |             |
|  |                |                  |                |               |                 |               | ANKRD31  | 0.97793      |             |
|  |                |                  |                |               |                 |               | ANKRD32  | 0.97793      |             |
|  |                |                  |                |               |                 |               | ANKRD33  | 0.97793      |             |
|  |                |                  |                |               |                 |               | ANKRD34  | 0.97793      |             |
|  |                |                  |                |               |                 |               | ANKRD35  | 0.97793      |             |
|  |                |                  |                |               |                 |               | ANKRD36  | 0.97793      |             |
|  |                |                  |                |               |                 |               | ANKRD37  | 0.97793      |             |
|  |                |                  |                |               |                 |               | ANKRD38  | 0.97793      |             |
|  |                |                  |                |               |                 |               | ANKRD39  | 0.97793      |             |
|  |                |                  |                |               |                 |               | ANKRD40  | 0.97793      |             |
|  |                |                  |                |               |                 |               | ANKRD41  | 0.97793      |             |
|  |                |                  |                |               |                 |               | ANKRD42  | 0.97793      |             |
|  |                |                  |                |               |                 |               | ANKRD43  | 0.97793      |             |
|  |                |                  |                |               |                 |               | ANKRD44  | 0.97793      |             |
|  |                |                  |                |               |                 |               | ANKRD45  | 0.97793      |             |
|  |                |                  |                |               |                 |               | ANKRD46  | 0.97793      |             |
|  |                |                  |                |               |                 |               | ANKRD47  | 0.97793      |             |
|  |                |                  |                |               |                 |               | ANKRD48  | 0.97793      |             |
|  |                |                  |                |               |                 |               | ANKRD49  | 0.97793      |             |
|  |                |                  |                |               |                 |               | ANKRD50  | 0.97793      |             |
|  |                |                  |                |               |                 |               | ANKRD51  | 0.97793      |             |
|  |                |                  |                |               |                 |               | ANKRD52  | 0.97793      |             |
|  |                |                  |                |               |                 |               | ANKRD53  | 0.97793      |             |
|  |                |                  |                |               |                 |               | ANKRD54  | 0.97793      |             |
|  |                |                  |                |               |                 |               | ANKRD55  | 0.97793      |             |
|  |                |                  |                |               |                 |               | ANKRD56  | 0.97793      |             |
|  |                |                  |                |               |                 |               | ANKRD57  | 0.97793      |             |
|  |                |                  |                |               |                 |               | ANKRD58  | 0.97793      |             |
|  |                |                  |                |               |                 |               | ANKRD59  | 0.97793      |             |
|  |                |                  |                |               |                 |               | ANKRD60  | 0.97793      |             |
|  |                |                  |                |               |                 |               | ANKRD61  | 0.97793      |             |
|  |                |                  |                |               |                 |               | ANKRD62  | 0.97793      |             |
|  |                |                  |                |               |                 |               | ANKRD63  | 0.97793      |             |
|  |                |                  |                |               |                 |               | ANKRD64  | 0.97793      |             |
|  |                |                  |                |               |                 |               | ANKRD65  | 0.97793      |             |
|  |                |                  |                |               |                 |               | ANKRD66  | 0.97793      |             |
|  |                |                  |                |               |                 |               | ANKRD67  | 0.97793      |             |
|  |                |                  |                |               |                 |               | ANKRD68  | 0.97793      |             |
|  |                |                  |                |               |                 |               | ANKRD69  | 0.97793      |             |
|  |                |                  |                |               |                 |               | ANKRD70  | 0.97793      |             |
|  |                |                  |                |               |                 |               | ANKRD71  | 0.97793      |             |
|  |                |                  |                |               |                 |               | ANKRD72  | 0.97793      |             |
|  |                |                  |                |               |                 |               | ANKRD73  | 0.97793      |             |
|  |                |                  |                |               |                 |               | ANKRD74  | 0.97793      |             |
|  |                |                  |                |               |                 |               | ANKRD75  | 0.97793      |             |
|  |                |                  |                |               |                 |               | ANKRD76  | 0.97793      |             |
|  |                |                  |                |               |                 |               | ANKRD77  | 0.97793      |             |
|  |                |                  |                |               |                 |               | ANKRD78  | 0.97793      |             |
|  |                |                  |                |               |                 |               | ANKRD79  | 0.97793      |             |
|  |                |                  |                |               |                 |               | ANKRD80  | 0.97793      |             |
|  |                |                  |                |               |                 |               | ANKRD81  | 0.97793      |             |
|  |                |                  |                |               |                 |               | ANKRD82  | 0.97793      |             |
|  |                |                  |                |               |                 |               | ANKRD83  | 0.97793      |             |
|  |                |                  |                |               |                 |               | ANKRD84  | 0.97793      |             |
|  |                |                  |                |               |                 |               | ANKRD85  | 0.97793      |             |
|  |                |                  |                |               |                 |               | ANKRD86  | 0.97793      |             |
|  |                |                  |                |               |                 |               | ANKRD87  | 0.97793      |             |
|  |                |                  |                |               |                 |               | ANKRD88  | 0.97793      |             |
|  |                |                  |                |               |                 |               | ANKRD89  | 0.97793      |             |
|  |                |                  |                |               |                 |               | ANKRD90  | 0.97793      |             |
|  |                |                  |                |               |                 |               | ANKRD91  | 0.97793      |             |
|  |                |                  |                |               |                 |               | ANKRD92  | 0.97793      |             |
|  |                |                  |                |               |                 |               | ANKRD93  | 0.97793      |             |
|  |                |                  |                |               |                 |               | ANKRD94  | 0.97793      |             |
|  |                |                  |                |               |                 |               | ANKRD95  | 0.97793      |             |
|  |                |                  |                |               |                 |               | ANKRD96  | 0.97793      |             |
|  |                |                  |                |               |                 |               | ANKRD97  | 0.97793      |             |
|  |                |                  |                |               |                 |               | ANKRD98  | 0.97793      |             |
|  |                |                  |                |               |                 |               | ANKRD99  | 0.97793      |             |
|  |                |                  |                |               |                 |               | ANKRD100 | 0.97793      |             |
|  |                |                  |                |               |                 |               | ANKRD101 | 0.97793      |             |
|  |                |                  |                |               |                 |               | ANKRD102 | 0.97793      |             |
|  |                |                  |                |               |                 |               | ANKRD103 | 0.97793      |             |
|  |                |                  |                |               |                 |               | ANKRD104 | 0.97793      |             |
|  |                |                  |                |               |                 |               | ANKRD105 | 0.97793      |             |
|  |                |                  |                |               |                 |               | ANKRD106 | 0.97793      |             |
|  |                |                  |                |               |                 |               | ANKRD107 | 0.97793      |             |
|  |                |                  |                |               |                 |               | ANKRD108 | 0.97793      |             |
|  |                |                  |                |               |                 |               | ANKRD109 | 0.97793      |             |
|  |                |                  |                |               |                 |               | ANKRD110 | 0.97793      |             |
|  |                |                  |                |               |                 |               | ANKRD111 | 0.97793      |             |
|  |                |                  |                |               |                 |               | ANKRD112 | 0.97793      |             |
|  |                |                  |                |               |                 |               | ANKRD113 | 0.97793      |             |
|  |                |                  |                |               |                 |               | ANKRD114 | 0.97793      |             |
|  |                |                  |                |               |                 |               | ANKRD115 | 0.97793      |             |
|  |                |                  |                |               |                 |               | ANKRD116 | 0.97793      |             |
|  |                |                  |                |               |                 |               | ANKRD117 | 0.97793      |             |
|  |                |                  |                |               |                 |               | ANKRD118 | 0.97793      |             |
|  |                |                  |                |               |                 |               | ANKRD119 | 0.97793      |             |
|  |                |                  |                |               |                 |               | ANKRD120 | 0.97793      |             |
|  |                |                  |                |               |                 |               | ANKRD121 | 0.97793      |             |
|  |                |                  |                |               |                 |               | ANKRD122 | 0.97793      |             |
|  |                |                  |                |               |                 |               | ANKRD123 | 0.97793      |             |
|  |                |                  |                |               |                 |               | ANKRD124 | 0.97793      |             |
|  |                |                  |                |               |                 |               | ANKRD125 | 0.97793      |             |
|  |                |                  |                |               |                 |               | ANKRD126 | 0.97793      |             |
|  |                |                  |                |               |                 |               | ANKRD127 | 0.97793      |             |
|  |                |                  |                |               |                 |               | ANKRD128 | 0.97793      |             |
|  |                |                  |                |               |                 |               | ANKRD129 | 0.97793      |             |
|  |                |                  |                |               |                 |               | ANKRD130 | 0.97793      |             |
|  |                |                  |                |               |                 |               | ANKRD131 | 0.97793      |             |
|  |                |                  |                |               |                 |               | ANKRD132 | 0.97793      |             |
|  |                |                  |                |               |                 |               | ANKRD133 | 0.97793      |             |
|  |                |                  |                |               |                 |               | ANKRD134 | 0.97793      |             |
|  |                |                  |                |               |                 |               | ANKRD135 | 0.97793      |             |
|  |                |                  |                |               |                 |               | ANKRD136 | 0.97793      |             |
|  |                |                  |                |               |                 |               | ANKRD137 | 0.97793      |             |
|  |                |                  |                |               |                 |               | ANKRD138 | 0.97793      |             |
|  |                |                  |                |               |                 |               | ANKRD139 | 0.97793      |             |
|  |                |                  |                |               |                 |               | ANKRD140 | 0.97793      |             |
|  |                |                  |                |               |                 |               | ANKRD141 | 0.97793      |             |
|  |                |                  |                |               |                 |               | ANKRD142 | 0.97793      |             |
|  |                |                  |                |               |                 |               | ANKRD143 | 0.97793      |             |
|  |                |                  |                |               |                 |               | ANKRD144 | 0.97793      |             |
|  |                |                  |                |               |                 |               | ANKRD145 | 0.97793      |             |
|  |                |                  |                |               |                 |               | ANKRD146 | 0.97793      |             |
|  |                |                  |                |               |                 |               | ANKRD147 | 0.97793      |             |
|  |                |                  |                |               |                 |               | ANKRD148 | 0.97793      |             |
|  |                |                  |                |               |                 |               | ANKRD149 | 0.97793      |             |
|  |                |                  |                |               |                 |               | ANKRD150 | 0.97793      |             |
|  |                |                  |                |               |                 |               | ANKRD151 | 0.97793      |             |
|  |                |                  |                |               |                 |               | ANKRD152 | 0.97793      |             |
|  |                |                  |                |               |                 |               | ANKRD153 | 0.97793      |             |
|  |                |                  |                |               |                 |               | ANKRD154 | 0.97793      |             |
|  |                |                  |                |               |                 |               | ANKRD155 | 0.97793      |             |
|  |                |                  |                |               |                 |               | ANKRD156 | 0.97793      |             |
|  |                |                  |                |               |                 |               | ANKRD157 | 0.97793      |             |
|  |                |                  |                |               |                 |               | ANKRD158 | 0.97793      |             |
|  |                |                  |                |               |                 |               | ANKRD159 | 0.97793      |             |
|  |                |                  |                |               |                 |               | ANKRD160 | 0.97793      |             |
|  |                |                  |                |               |                 |               | ANKRD161 | 0.97793      |             |
|  |                |                  |                |               |                 |               | ANKRD162 | 0.97793      |             |
|  |                |                  |                |               |                 |               | ANKRD163 | 0.97793      |             |
|  |                |                  |                |               |                 |               | ANKRD164 | 0.97793      |             |
|  |                |                  |                |               |                 |               | ANKRD165 | 0.97793      |             |
|  |                |                  |                |               |                 |               | ANKRD166 | 0.97793      |             |
|  |                |                  |                |               |                 |               | ANKRD167 | 0.97793      |             |
|  |                |                  |                |               |                 |               | ANKRD168 | 0.97793      |             |
|  |                |                  |                |               |                 |               | ANKRD169 | 0.97793      |             |
|  |                |                  |                |               |                 |               | ANKRD170 | 0.97793      |             |
|  |                |                  |                |               |                 |               | ANKRD171 | 0.97793      |             |
|  |                |                  |                |               |                 |               | ANKRD172 | 0.97793      |             |
|  |                |                  |                |               |                 |               | ANKRD173 | 0.97793      |             |
|  |                |                  |                |               |                 |               | ANKRD174 | 0.97793      |             |
|  |                |                  |                |               |                 |               | ANKRD175 | 0.97793      |             |
|  |                |                  |                |               |                 |               | ANKRD176 | 0.97793      |             |
|  |                |                  |                |               |                 |               | ANKRD177 | 0.97793      |             |
|  |                |                  |                |               |                 |               | ANKRD178 | 0.97793      |             |
|  |                |                  |                |               |                 |               | ANKRD179 | 0.97793      |             |
|  |                |                  |                |               |                 |               | ANKRD180 | 0.97793      |             |
|  |                |                  |                |               |                 |               | ANKRD181 | 0.97793      |             |
|  |                |                  |                |               |                 |               | ANKRD182 | 0.97793      |             |
|  |                |                  |                |               |                 |               | ANKRD183 | 0.97793      |             |
|  |                |                  |                |               |                 |               | ANKRD184 | 0.97793      |             |
|  |                |                  |                |               |                 |               | ANKRD185 | 0.97793      |             |
|  |                |                  |                |               |                 |               | ANKRD186 | 0.97793      |             |
|  |                |                  |                |               |                 |               | ANKRD187 | 0.97793      |             |
|  |                |                  |                |               |                 |               | ANKRD188 | 0.97793      |             |
|  |                |                  |                |               |                 |               | ANKRD189 | 0.97793      |             |
|  |                |                  |                |               |                 |               | ANKRD190 | 0.97793      |             |
|  |                |                  |                |               |                 |               | ANKRD191 | 0.97793      |             |
|  |                |                  |                |               |                 |               | ANKRD192 | 0.97793      |             |
|  |                |                  |                |               |                 |               | ANKRD193 | 0.97793      |             |
|  |                |                  |                |               |                 |               | ANKRD194 | 0.97793      |             |
|  |                |                  |                |               |                 |               | ANKRD195 | 0.97793      |             |
|  |                |                  |                |               |                 |               | ANKRD196 | 0.97793      |             |
|  |                |                  |                |               |                 |               | ANKRD197 | 0.97793      |             |
|  |                |                  |                |               |                 |               | ANKRD198 | 0.97793      |             |
|  |                |                  |                |               |                 |               | ANKRD199 | 0.97793      |             |
|  |                |                  |                |               |                 |               | ANKRD200 | 0.97793      |             |
|  |                |                  |                |               |                 |               | ANKRD201 | 0.97793      |             |
|  |                |                  |                |               |                 |               | ANKRD202 | 0.97793      |             |
|  |                |                  |                |               |                 |               | ANKRD203 | 0.97793      |             |
|  |                |                  |                |               |                 |               | ANKRD204 | 0.97793      |             |
|  |                |                  |                |               |                 |               | ANKRD205 | 0.97793      |             |
|  |                |                  |                |               |                 |               | ANKRD206 | 0.97793      |             |
|  |                |                  |                |               |                 |               | ANKRD207 | 0.97793      |             |
|  |                |                  |                |               |                 |               | ANKRD208 | 0.97793      |             |
|  |                |                  |                |               |                 |               | ANKRD209 | 0.97793      |             |
|  |                |                  |                |               |                 |               | ANKRD210 | 0.97793      |             |
|  |                |                  |                |               |                 |               | ANKRD211 | 0.97793      |             |
|  |                |                  |                |               |                 |               | ANKRD212 | 0.97793      |             |
|  |                |                  |                |               |                 |               | ANKRD213 | 0.97793      |             |
|  |                |                  |                |               |                 |               | ANKRD214 | 0.97793      |             |
|  |                |                  |                |               |                 |               | ANKRD215 | 0.97793      |             |
|  |                |                  |                |               |                 |               | ANKRD216 | 0.97793      |             |
|  |                |                  |                |               |                 |               | ANKRD217 | 0.97793      |             |
|  |                |                  |                |               |                 |               | ANKRD218 | 0.97793      |             |
|  |                |                  |                |               |                 |               | ANKRD219 | 0.97793      |             |
|  |                |                  |                |               |                 |               | ANKRD220 | 0.97793      |             |
|  |                |                  |                |               |                 |               | ANKRD221 | 0.97793      |             |
|  |                |                  |                |               |                 |               | ANKRD222 | 0.97793      |             |
|  |                |                  |                |               |                 |               | ANKRD223 | 0.97793      |             |
|  |                |                  |                |               |                 |               | ANKRD224 | 0.97793      |             |
|  |                |                  |                | </            |                 |               |          |              |             |

|  | early_above_70 | early_aged_60_70 | early_below_55 | late_above_70 | late_aged_60_70 | late_below_55 | Probe ID | Description | Correlation |
|--|----------------|------------------|----------------|---------------|-----------------|---------------|----------|-------------|-------------|
|  |                |                  |                |               |                 |               | BLZF1    |             | 0.97057     |
|  |                |                  |                |               |                 |               | CLDN12   |             | 0.93440     |
|  |                |                  |                |               |                 |               | G2E3     |             | 0.95768     |
|  |                |                  |                |               |                 |               | LRIF1    |             | 0.98523     |
|  |                |                  |                |               |                 |               | MAP4K3   |             | 0.98962     |
|  |                |                  |                |               |                 |               | NKTR     |             | 0.78342     |
|  |                |                  |                |               |                 |               | RAB21    |             | 0.95419     |
|  |                |                  |                |               |                 |               | SESN1    |             | 0.95651     |
|  |                |                  |                |               |                 |               | TANK     |             | 0.97046     |
|  |                |                  |                |               |                 |               | UHMK1    |             | 0.98544     |
|  |                |                  |                |               |                 |               | UPRT     |             | 0.97147     |
|  |                |                  |                |               |                 |               | WWC2     |             | 0.99271     |
|  |                |                  |                |               |                 |               | ACTR2    |             | 0.98996     |
|  |                |                  |                |               |                 |               | ATF1     |             | 0.98105     |
|  |                |                  |                |               |                 |               | FAM199X  |             | 0.98525     |
|  |                |                  |                |               |                 |               | IMPG2    |             | 0.89113     |
|  |                |                  |                |               |                 |               | LPGAT1   |             | 0.90416     |
|  |                |                  |                |               |                 |               | MOB1A    |             | 0.97420     |
|  |                |                  |                |               |                 |               | SENP6    |             | 0.92545     |
|  |                |                  |                |               |                 |               | SMAP1    |             | 0.97975     |
|  |                |                  |                |               |                 |               | TWSG1    |             | 0.95296     |
|  |                |                  |                |               |                 |               | GLIPR1L2 |             | 0.97278     |
|  |                |                  |                |               |                 |               | TMEM135  |             | 0.97417     |
|  |                |                  |                |               |                 |               | TOP1     |             | 0.98591     |
|  |                |                  |                |               |                 |               | TRUB1    |             | 0.92937     |

|  | early_above_70 | early_aged_60_70 | early_below_55 | late_above_70 | late_aged_60_70 | late_below_55 | Probe ID | Description | Correlation |
|--|----------------|------------------|----------------|---------------|-----------------|---------------|----------|-------------|-------------|
|  |                |                  |                |               |                 |               | CSRNP1   |             | 0.95191     |
|  |                |                  |                |               |                 |               | DTNB     |             | 0.96026     |
|  |                |                  |                |               |                 |               | ETV2     |             | 0.98558     |
|  |                |                  |                |               |                 |               | GADD45G  |             | 0.95041     |
|  |                |                  |                |               |                 |               | LPCAT3   |             | 0.97131     |
|  |                |                  |                |               |                 |               | NR4A1    |             | 0.95161     |
|  |                |                  |                |               |                 |               | PLEKHA6  |             | 0.99319     |
|  |                |                  |                |               |                 |               | PTPRS    |             | 0.97878     |
|  |                |                  |                |               |                 |               | ZNF18    |             | 0.95703     |
|  |                |                  |                |               |                 |               | ZNF215   |             | 0.95271     |
|  |                |                  |                |               |                 |               | SPTBN4   |             | 0.96678     |
|  |                |                  |                |               |                 |               | ADHFE1   |             | 0.97379     |
|  |                |                  |                |               |                 |               | AKAP3    |             | 0.93628     |
|  |                |                  |                |               |                 |               | BOC      |             | 0.96467     |
|  |                |                  |                |               |                 |               | C7       |             | 0.95253     |
|  |                |                  |                |               |                 |               | CAMKMT   |             | 0.99947     |
|  |                |                  |                |               |                 |               | CBX7     |             | 0.96069     |
|  |                |                  |                |               |                 |               | CHST8    |             | 0.90281     |
|  |                |                  |                |               |                 |               | CNKSR2   |             | 0.94051     |
|  |                |                  |                |               |                 |               | CRTC1    |             | 0.98922     |
|  |                |                  |                |               |                 |               | DGCR2    |             | 0.95141     |
|  |                |                  |                |               |                 |               | EMILIN2  |             | 0.83251     |
|  |                |                  |                |               |                 |               | FAAH     |             | 0.93922     |
|  |                |                  |                |               |                 |               | GALM     |             | 0.97628     |
|  |                |                  |                |               |                 |               | IQSEC3   |             | 0.98253     |
|  |                |                  |                |               |                 |               | MUC5B    |             | 0.78571     |
|  |                |                  |                |               |                 |               | MYBPC2   |             | 0.84267     |
|  |                |                  |                |               |                 |               | PGR      |             | 0.96897     |
|  |                |                  |                |               |                 |               | PML      |             | 0.85320     |
|  |                |                  |                |               |                 |               | SEMA3F   |             | 0.98100     |
|  |                |                  |                |               |                 |               | SLC4A10  |             | 0.84661     |
|  |                |                  |                |               |                 |               | ALG14    |             | 0.97930     |
|  |                |                  |                |               |                 |               | GGT7     |             | 0.94480     |
|  |                |                  |                |               |                 |               | ITGA2    |             | 0.97457     |
|  |                |                  |                |               |                 |               | PAOX     |             | 0.96338     |
|  |                |                  |                |               |                 |               | PHLDB3   |             | 0.95854     |
|  |                |                  |                |               |                 |               | PIWIL2   |             | 0.89029     |
|  |                |                  |                |               |                 |               | SLC25A35 |             | 0.99002     |
|  |                |                  |                |               |                 |               | SPG7     |             | 0.94016     |
|  |                |                  |                |               |                 |               | TMEM125  |             | 0.96983     |
|  |                |                  |                |               |                 |               | TMEM198  |             | 0.86056     |

|  | early_above_70 | early_aged_60_70 | early_below_55 | late_above_70 | late_aged_60_70 | late_below_55 | Probe ID | Descripti... | Correlation |
|--|----------------|------------------|----------------|---------------|-----------------|---------------|----------|--------------|-------------|
|  |                |                  |                |               |                 |               | ACER3    |              | 0.97769     |
|  |                |                  |                |               |                 |               | ADAM17   |              | 0.98787     |
|  |                |                  |                |               |                 |               | CALCOCO2 |              | 0.96145     |
|  |                |                  |                |               |                 |               | CDK8     |              | 0.96500     |
|  |                |                  |                |               |                 |               | CEP85    |              | 0.91529     |
|  |                |                  |                |               |                 |               | DIP2B    |              | 0.95302     |
|  |                |                  |                |               |                 |               | FAM126A  |              | 0.94519     |
|  |                |                  |                |               |                 |               | FMR1     |              | 0.96343     |
|  |                |                  |                |               |                 |               | FUBP3    |              | 0.96536     |
|  |                |                  |                |               |                 |               | GABPB2   |              | 0.89739     |
|  |                |                  |                |               |                 |               | GMCL1    |              | 0.91411     |
|  |                |                  |                |               |                 |               | KLHL24   |              | 0.96340     |
|  |                |                  |                |               |                 |               | LMBR1    |              | 0.99489     |
|  |                |                  |                |               |                 |               | NEK4     |              | 0.96131     |
|  |                |                  |                |               |                 |               | PDCD10   |              | 0.91219     |
|  |                |                  |                |               |                 |               | RABGAP1L |              | 0.96103     |
|  |                |                  |                |               |                 |               | SMG1     |              | 0.92521     |
|  |                |                  |                |               |                 |               | ST3GAL1  |              | 0.97234     |
|  |                |                  |                |               |                 |               | STAG2    |              | 0.97925     |
|  |                |                  |                |               |                 |               | TAF2     |              | 0.99560     |
|  |                |                  |                |               |                 |               | TBCEL    |              | 0.93427     |
|  |                |                  |                |               |                 |               | TNIK     |              | 0.90024     |
|  |                |                  |                |               |                 |               | UBE3C    |              | 0.96664     |
|  |                |                  |                |               |                 |               | VGLL4    |              | 0.93347     |
|  |                |                  |                |               |                 |               | VCPIP1   |              | 0.97773     |
|  |                |                  |                |               |                 |               | XPOT     |              | 0.94584     |
|  |                |                  |                |               |                 |               | ADNP     |              | 0.95149     |
|  |                |                  |                |               |                 |               | AHCTF1   |              | 0.95219     |
|  |                |                  |                |               |                 |               | ANKIB1   |              | 0.97203     |
|  |                |                  |                |               |                 |               | CCAR1    |              | 0.94499     |
|  |                |                  |                |               |                 |               | EAF1     |              | 0.92452     |
|  |                |                  |                |               |                 |               | GAB1     |              | 0.95584     |
|  |                |                  |                |               |                 |               | GNA13    |              | 0.97811     |
|  |                |                  |                |               |                 |               | GUCY2C   |              | 0.93067     |
|  |                |                  |                |               |                 |               | HLTF     |              | 0.96545     |
|  |                |                  |                |               |                 |               | IL17RD   |              | 0.88620     |
|  |                |                  |                |               |                 |               | MTDH     |              | 0.93841     |
|  |                |                  |                |               |                 |               | NCK1     |              | 0.99428     |
|  |                |                  |                |               |                 |               | NEDD1    |              | 0.94341     |
|  |                |                  |                |               |                 |               | PGK1     |              | 0.94707     |
|  |                |                  |                |               |                 |               | PHF20L1  |              | 0.98034     |
|  |                |                  |                |               |                 |               | PKD2     |              | 0.94656     |
|  |                |                  |                |               |                 |               | RALGPS1  |              | 0.93411     |
|  |                |                  |                |               |                 |               | RBL1     |              | 0.95395     |
|  |                |                  |                |               |                 |               | RCOR1    |              | 0.98687     |
|  |                |                  |                |               |                 |               | RRM2B    |              | 0.96360     |
|  |                |                  |                |               |                 |               | SLC25A24 |              | 0.98457     |
|  |                |                  |                |               |                 |               | STAG1    |              | 0.93693     |
|  |                |                  |                |               |                 |               | STK4     |              | 0.95388     |
|  |                |                  |                |               |                 |               | TAC1     |              | 0.91462     |
|  |                |                  |                |               |                 |               | TRAM1    |              | 0.94691     |
|  |                |                  |                |               |                 |               | JRKL     |              | 0.97417     |
|  |                |                  |                |               |                 |               | NR2C2    |              | 0.95653     |
|  |                |                  |                |               |                 |               | PPP4R2   |              | 0.98487     |
|  |                |                  |                |               |                 |               | BMI1     |              | 0.82809     |
|  |                |                  |                |               |                 |               | CASP8AP2 |              | 0.88276     |
|  |                |                  |                |               |                 |               | DDX39B   |              | 0.92727     |
|  |                |                  |                |               |                 |               | FOXP2    |              | 0.95223     |
|  |                |                  |                |               |                 |               | GOLIM4   |              | 0.95902     |
|  |                |                  |                |               |                 |               | HOXC6    |              | 0.95802     |
|  |                |                  |                |               |                 |               | JAG1     |              | 0.98879     |
|  |                |                  |                |               |                 |               | JMJD1C   |              | 0.94495     |
|  |                |                  |                |               |                 |               | OCLN     |              | 0.96201     |
|  |                |                  |                |               |                 |               | OTUD4    |              | 0.98378     |
|  |                |                  |                |               |                 |               | PAWR     |              | 0.96325     |
|  |                |                  |                |               |                 |               | PRDM10   |              | 0.96393     |
|  |                |                  |                |               |                 |               | RRAGC    |              | 0.92790     |
|  |                |                  |                |               |                 |               | ZBTB11   |              | 0.96926     |
|  |                |                  |                |               |                 |               | ZBTB6    |              | 0.97211     |

|  | early_above_70 | early_aged_60_70 | early_below_55 | late_above_70 | late_aged_60_70 | late_below_55 | Probe ID | Description | Correlation |
|--|----------------|------------------|----------------|---------------|-----------------|---------------|----------|-------------|-------------|
|  |                |                  |                |               |                 |               | CERK     |             | 0.92289     |
|  |                |                  |                |               |                 |               | GLT8D2   |             | 0.93568     |
|  |                |                  |                |               |                 |               | PLEKHH2  |             | 0.94602     |
|  |                |                  |                |               |                 |               | PREX1    |             | 0.97269     |
|  |                |                  |                |               |                 |               | SLCO1A2  |             | 0.88436     |
|  |                |                  |                |               |                 |               | TMCC2    |             | 0.85872     |
|  |                |                  |                |               |                 |               | TRIM22   |             | 0.93330     |
|  |                |                  |                |               |                 |               | UNC5B    |             | 0.94207     |
|  |                |                  |                |               |                 |               | MVP      |             | 0.94674     |
|  |                |                  |                |               |                 |               | NOTCH4   |             | 0.94194     |
|  |                |                  |                |               |                 |               | PLEKHG2  |             | 0.92442     |
|  |                |                  |                |               |                 |               | SLC1A7   |             | 0.87089     |
|  |                |                  |                |               |                 |               | ELFN1    |             | 0.92406     |
|  |                |                  |                |               |                 |               | ADAM19   |             | 0.88480     |
|  |                |                  |                |               |                 |               | COL21A1  |             | 0.93585     |
|  |                |                  |                |               |                 |               | DOCK6    |             | 0.95879     |
|  |                |                  |                |               |                 |               | GRAMD1A  |             | 0.95369     |
|  |                |                  |                |               |                 |               | ISM1     |             | 0.92115     |
|  |                |                  |                |               |                 |               | JAM2     |             | 0.96747     |
|  |                |                  |                |               |                 |               | KSR1     |             | 0.92593     |
|  |                |                  |                |               |                 |               | NLRP1    |             | 0.95787     |
|  |                |                  |                |               |                 |               | OSBPL6   |             | 0.93079     |
|  |                |                  |                |               |                 |               | PDGFRB   |             | 0.87184     |
|  |                |                  |                |               |                 |               | RASGRF1  |             | 0.91607     |
|  |                |                  |                |               |                 |               | RHOJ     |             | 0.97400     |
|  |                |                  |                |               |                 |               | SLFN13   |             | 0.90839     |
|  |                |                  |                |               |                 |               | ST6GAL2  |             | 0.82551     |
|  |                |                  |                |               |                 |               | TIMP2    |             | 0.99011     |
|  |                |                  |                |               |                 |               | USHBP1   |             | 0.98223     |
|  |                |                  |                |               |                 |               | XAF1     |             | 0.88835     |
|  |                |                  |                |               |                 |               | COL18A1  |             | 0.96385     |
|  |                |                  |                |               |                 |               | TGM2     |             | 0.98068     |
|  |                |                  |                |               |                 |               | ZNF521   |             | 0.92902     |
|  |                |                  |                |               |                 |               | GPR146   |             | 0.90659     |
|  |                |                  |                |               |                 |               | NBEAL2   |             | 0.96061     |
|  |                |                  |                |               |                 |               | SLCO3A1  |             | 0.96678     |
|  |                |                  |                |               |                 |               | TGFBR2   |             | 0.90054     |
|  |                |                  |                |               |                 |               | TMEM63C  |             | 0.87817     |
|  |                |                  |                |               |                 |               | TRPV2    |             | 0.71980     |



|  | early_above_70 | early_aged_60_70 | early_below_55 | late_above_70 | late_aged_60_70 | late_below_55 | Probe ID  | Descripti... | Correlation |
|--|----------------|------------------|----------------|---------------|-----------------|---------------|-----------|--------------|-------------|
|  |                |                  |                |               |                 |               | ABL1      |              | 0.96181     |
|  |                |                  |                |               |                 |               | AKAP10    |              | 0.97756     |
|  |                |                  |                |               |                 |               | AKAP9     |              | 0.98111     |
|  |                |                  |                |               |                 |               | ATP13A3   |              | 0.96199     |
|  |                |                  |                |               |                 |               | DNAJC13   |              | 0.98678     |
|  |                |                  |                |               |                 |               | GCLM      |              | 0.95980     |
|  |                |                  |                |               |                 |               | GNAQ      |              | 0.98314     |
|  |                |                  |                |               |                 |               | HIVEP1    |              | 0.99353     |
|  |                |                  |                |               |                 |               | ITCH      |              | 0.97483     |
|  |                |                  |                |               |                 |               | JAK2      |              | 0.94078     |
|  |                |                  |                |               |                 |               | KAT6A     |              | 0.97060     |
|  |                |                  |                |               |                 |               | KIF2A     |              | 0.98023     |
|  |                |                  |                |               |                 |               | KIF3A     |              | 0.94255     |
|  |                |                  |                |               |                 |               | LYPLA1    |              | 0.94969     |
|  |                |                  |                |               |                 |               | MAPK8     |              | 0.90263     |
|  |                |                  |                |               |                 |               | METTL14   |              | 0.96291     |
|  |                |                  |                |               |                 |               | NAA25     |              | 0.96225     |
|  |                |                  |                |               |                 |               | NCOA2     |              | 0.99510     |
|  |                |                  |                |               |                 |               | NCOR1     |              | 0.96152     |
|  |                |                  |                |               |                 |               | PANX1     |              | 0.95755     |
|  |                |                  |                |               |                 |               | PARP8     |              | 0.99175     |
|  |                |                  |                |               |                 |               | PTPN21    |              | 0.92087     |
|  |                |                  |                |               |                 |               | PUS7L     |              | 0.97504     |
|  |                |                  |                |               |                 |               | RBM27     |              | 0.97483     |
|  |                |                  |                |               |                 |               | RC3H2     |              | 0.97300     |
|  |                |                  |                |               |                 |               | ROCK2     |              | 0.97687     |
|  |                |                  |                |               |                 |               | RSF1      |              | 0.98400     |
|  |                |                  |                |               |                 |               | SLC38A1   |              | 0.96828     |
|  |                |                  |                |               |                 |               | SP4       |              | 0.95865     |
|  |                |                  |                |               |                 |               | SPATA5    |              | 0.90396     |
|  |                |                  |                |               |                 |               | STAT1     |              | 0.99156     |
|  |                |                  |                |               |                 |               | STEAP1B   |              | 0.81930     |
|  |                |                  |                |               |                 |               | TCEANC2   |              | 0.95325     |
|  |                |                  |                |               |                 |               | THUMPD3   |              | 0.96227     |
|  |                |                  |                |               |                 |               | TRAPPC8   |              | 0.98034     |
|  |                |                  |                |               |                 |               | UEVLD     |              | 0.98809     |
|  |                |                  |                |               |                 |               | UHRF1BP1  |              | 0.97807     |
|  |                |                  |                |               |                 |               | UHRF1BP1L |              | 0.98398     |
|  |                |                  |                |               |                 |               | USH2A     |              | 0.86863     |
|  |                |                  |                |               |                 |               | USP25     |              | 0.98023     |
|  |                |                  |                |               |                 |               | ZNF41     |              | 0.99026     |
|  |                |                  |                |               |                 |               | ZNF800    |              | 0.97066     |
|  |                |                  |                |               |                 |               | CDK12     |              | 0.92340     |
|  |                |                  |                |               |                 |               | DDX21     |              | 0.99501     |
|  |                |                  |                |               |                 |               | STT3B     |              | 0.98378     |
|  |                |                  |                |               |                 |               | ATP2A2    |              | 0.98959     |
|  |                |                  |                |               |                 |               | SOWAHC    |              | 0.99297     |
|  |                |                  |                |               |                 |               | TMCC1     |              | 0.98703     |
|  |                |                  |                |               |                 |               | BBX       |              | 0.99003     |
|  |                |                  |                |               |                 |               | CCL28     |              | 0.88080     |
|  |                |                  |                |               |                 |               | CDC27     |              | 0.95219     |
|  |                |                  |                |               |                 |               | CLTC      |              | 0.97661     |
|  |                |                  |                |               |                 |               | DOCK7     |              | 0.98208     |
|  |                |                  |                |               |                 |               | EPB41L5   |              | 0.97359     |
|  |                |                  |                |               |                 |               | FBXO21    |              | 0.99045     |
|  |                |                  |                |               |                 |               | FILIP1    |              | 0.99655     |
|  |                |                  |                |               |                 |               | GUCY1A2   |              | 0.92742     |
|  |                |                  |                |               |                 |               | HACE1     |              | 0.92448     |
|  |                |                  |                |               |                 |               | L2HGDH    |              | 0.99601     |
|  |                |                  |                |               |                 |               | MARVELD2  |              | 0.96399     |
|  |                |                  |                |               |                 |               | MED13     |              | 0.95712     |
|  |                |                  |                |               |                 |               | MMRN1     |              | 0.93714     |
|  |                |                  |                |               |                 |               | MYH10     |              | 0.92034     |
|  |                |                  |                |               |                 |               | NEK1      |              | 0.93232     |
|  |                |                  |                |               |                 |               | NPAT      |              | 0.98451     |
|  |                |                  |                |               |                 |               | PEX1      |              | 0.97058     |
|  |                |                  |                |               |                 |               | PIK3CB    |              | 0.95381     |
|  |                |                  |                |               |                 |               | PPP2R3A   |              | 0.98704     |
|  |                |                  |                |               |                 |               | RIF1      |              | 0.98558     |
|  |                |                  |                |               |                 |               | SLC35F5   |              | 0.94819     |
|  |                |                  |                |               |                 |               | SLK       |              | 0.98588     |
|  |                |                  |                |               |                 |               | CTNNB1    |              | 0.96926     |
|  |                |                  |                |               |                 |               | LRRC58    |              | 0.99177     |
|  |                |                  |                |               |                 |               | SLC5A3    |              | 0.98015     |
|  |                |                  |                |               |                 |               | ZNF91     |              | 0.98232     |
|  |                |                  |                |               |                 |               | C5orf51   |              | 0.93012     |
|  |                |                  |                |               |                 |               | DCAF12    |              | 0.95642     |
|  |                |                  |                |               |                 |               | EIF2AK2   |              | 0.94110     |
|  |                |                  |                |               |                 |               | FBXL14    |              | 0.98580     |
|  |                |                  |                |               |                 |               | GTF3C4    |              | 0.97673     |
|  |                |                  |                |               |                 |               | INTS2     |              | 0.96585     |
|  |                |                  |                |               |                 |               | LIN52     |              | 0.96674     |
|  |                |                  |                |               |                 |               | NSUN3     |              | 0.97983     |
|  |                |                  |                |               |                 |               | PPTC7     |              | 0.94834     |
|  |                |                  |                |               |                 |               | SOWAHB    |              | 0.96898     |
|  |                |                  |                |               |                 |               | TOPORS    |              | 0.97173     |
|  |                |                  |                |               |                 |               | WIPF2     |              | 0.94752     |
|  |                |                  |                |               |                 |               | ZNF148    |              | 0.98993     |
|  |                |                  |                |               |                 |               | ZNF791    |              | 0.98795     |

|  | early_above_70 | early_aged_60_70 | early_below_55 | late_above_70 | late_aged_60_70 | late_below_55 | Probe ID | Descripti... | Correlation |
|--|----------------|------------------|----------------|---------------|-----------------|---------------|----------|--------------|-------------|
|  |                |                  |                |               |                 |               | ANAPC1   |              | 0.99232     |
|  |                |                  |                |               |                 |               | ARID4A   |              | 0.98198     |
|  |                |                  |                |               |                 |               | ARID4B   |              | 0.96815     |
|  |                |                  |                |               |                 |               | BDP1     |              | 0.94719     |
|  |                |                  |                |               |                 |               | CPEB4    |              | 0.95536     |
|  |                |                  |                |               |                 |               | DCAF17   |              | 0.94782     |
|  |                |                  |                |               |                 |               | DGKH     |              | 0.97049     |
|  |                |                  |                |               |                 |               | DHX8     |              | 0.97021     |
|  |                |                  |                |               |                 |               | DNM2     |              | 0.95063     |
|  |                |                  |                |               |                 |               | FAM214B  |              | 0.94863     |
|  |                |                  |                |               |                 |               | GBP3     |              | 0.94213     |
|  |                |                  |                |               |                 |               | IKZF2    |              | 0.95456     |
|  |                |                  |                |               |                 |               | IPMK     |              | 0.98674     |
|  |                |                  |                |               |                 |               | KIF21A   |              | 0.97451     |
|  |                |                  |                |               |                 |               | LIMA1    |              | 0.97178     |
|  |                |                  |                |               |                 |               | LIMCH1   |              | 0.98909     |
|  |                |                  |                |               |                 |               | MIS18BP1 |              | 0.94988     |
|  |                |                  |                |               |                 |               | NCOA1    |              | 0.98634     |
|  |                |                  |                |               |                 |               | NMT1     |              | 0.93238     |
|  |                |                  |                |               |                 |               | NPC1     |              | 0.99435     |
|  |                |                  |                |               |                 |               | POLR2B   |              | 0.99300     |
|  |                |                  |                |               |                 |               | PTCD2    |              | 0.98195     |
|  |                |                  |                |               |                 |               | PTPRK    |              | 0.97624     |
|  |                |                  |                |               |                 |               | RAB3GAP2 |              | 0.98315     |
|  |                |                  |                |               |                 |               | SBF2     |              | 0.98626     |
|  |                |                  |                |               |                 |               | SERAC1   |              | 0.97380     |
|  |                |                  |                |               |                 |               | SLC25A16 |              | 0.96825     |
|  |                |                  |                |               |                 |               | SLC2A13  |              | 0.96366     |
|  |                |                  |                |               |                 |               | SOS2     |              | 0.99783     |
|  |                |                  |                |               |                 |               | SPTBN1   |              | 0.98382     |
|  |                |                  |                |               |                 |               | STXBP3   |              | 0.99544     |
|  |                |                  |                |               |                 |               | TEC      |              | 0.94239     |
|  |                |                  |                |               |                 |               | UBE3B    |              | 0.94105     |
|  |                |                  |                |               |                 |               | USP16    |              | 0.98775     |
|  |                |                  |                |               |                 |               | USP53    |              | 0.99286     |
|  |                |                  |                |               |                 |               | DNAJB14  |              | 0.98857     |
|  |                |                  |                |               |                 |               | AKAP6    |              | 0.98759     |
|  |                |                  |                |               |                 |               | CCDC6    |              | 0.97711     |
|  |                |                  |                |               |                 |               | EIF4G3   |              | 0.97408     |
|  |                |                  |                |               |                 |               | FAM214A  |              | 0.96136     |
|  |                |                  |                |               |                 |               | FNBP1L   |              | 0.97250     |
|  |                |                  |                |               |                 |               | GRHL1    |              | 0.87267     |
|  |                |                  |                |               |                 |               | IDS      |              | 0.95516     |
|  |                |                  |                |               |                 |               | KTN1     |              | 0.99041     |
|  |                |                  |                |               |                 |               | LRP12    |              | 0.98315     |
|  |                |                  |                |               |                 |               | NCKAP1   |              | 0.97909     |
|  |                |                  |                |               |                 |               | OSBPL1A  |              | 0.96390     |
|  |                |                  |                |               |                 |               | PER3     |              | 0.99678     |
|  |                |                  |                |               |                 |               | RANBP9   |              | 0.98634     |
|  |                |                  |                |               |                 |               | SLC10A7  |              | 0.93521     |
|  |                |                  |                |               |                 |               | SPAG9    |              | 0.91858     |
|  |                |                  |                |               |                 |               | UBE3A    |              | 0.99058     |
|  |                |                  |                |               |                 |               | WDFY1    |              | 0.95653     |
|  |                |                  |                |               |                 |               | CPSF2    |              | 0.99625     |
|  |                |                  |                |               |                 |               | CNST     |              | 0.99234     |
|  |                |                  |                |               |                 |               | KLHL28   |              | 0.96794     |
|  |                |                  |                |               |                 |               | RNF11    |              | 0.96727     |
|  |                |                  |                |               |                 |               | TAOK1    |              | 0.98842     |
|  |                |                  |                |               |                 |               | TPM4     |              | 0.94870     |

|  | early_above_70 | early_aged_60_70 | early_below_55 | late_above_70 | late_aged_60_70 | late_below_55 | Probe ID | Description | Correlation |
|--|----------------|------------------|----------------|---------------|-----------------|---------------|----------|-------------|-------------|
|  |                |                  |                |               |                 |               | ATP2B4   |             | 0.97140     |
|  |                |                  |                |               |                 |               | CAB39L   |             | 0.97878     |
|  |                |                  |                |               |                 |               | CREB3L4  |             | 0.95848     |
|  |                |                  |                |               |                 |               | DGKG     |             | 0.92933     |
|  |                |                  |                |               |                 |               | GRTP1    |             | 0.94304     |
|  |                |                  |                |               |                 |               | IL20RA   |             | 0.96345     |
|  |                |                  |                |               |                 |               | KIAA1549 |             | 0.87038     |
|  |                |                  |                |               |                 |               | MYH11    |             | 0.95934     |
|  |                |                  |                |               |                 |               | SOX9     |             | 0.90973     |
|  |                |                  |                |               |                 |               | VIPR1    |             | 0.97871     |
|  |                |                  |                |               |                 |               | SIM2     |             | 0.77816     |
|  |                |                  |                |               |                 |               | ARID3B   |             | 0.91853     |
|  |                |                  |                |               |                 |               | ING1     |             | 0.97006     |
|  |                |                  |                |               |                 |               | TSSK4    |             | 0.88038     |
|  |                |                  |                |               |                 |               | TNS1     |             | 0.90343     |
|  |                |                  |                |               |                 |               | AGTR1    |             | 0.98620     |
|  |                |                  |                |               |                 |               | ARHGAP20 |             | 0.97255     |
|  |                |                  |                |               |                 |               | ARHGEF4  |             | 0.96182     |
|  |                |                  |                |               |                 |               | CUX2     |             | 0.95805     |
|  |                |                  |                |               |                 |               | FAM189A2 |             | 0.98873     |
|  |                |                  |                |               |                 |               | GRIA3    |             | 0.94720     |
|  |                |                  |                |               |                 |               | ITIH5    |             | 0.95756     |
|  |                |                  |                |               |                 |               | MYOCD    |             | 0.98778     |
|  |                |                  |                |               |                 |               | NEK3     |             | 0.96863     |
|  |                |                  |                |               |                 |               | NRK      |             | 0.97602     |
|  |                |                  |                |               |                 |               | PGM5     |             | 0.92898     |
|  |                |                  |                |               |                 |               | PITPNM3  |             | 0.96266     |
|  |                |                  |                |               |                 |               | RNF157   |             | 0.90320     |
|  |                |                  |                |               |                 |               | SLC22A3  |             | 0.93313     |
|  |                |                  |                |               |                 |               | NQO1     |             | 0.96186     |
|  |                |                  |                |               |                 |               | NSUN6    |             | 0.98882     |
|  |                |                  |                |               |                 |               | MAGI2    |             | 0.97296     |
|  |                |                  |                |               |                 |               | SLC25A21 |             | 0.94245     |
|  |                |                  |                |               |                 |               | CRELD1   |             | 0.94389     |
|  |                |                  |                |               |                 |               | ELL3     |             | 0.96380     |
|  |                |                  |                |               |                 |               | FZD9     |             | 0.97075     |
|  |                |                  |                |               |                 |               | KCNJ11   |             | 0.93095     |
|  |                |                  |                |               |                 |               | PDZRN4   |             | 0.95317     |
|  |                |                  |                |               |                 |               | RORC     |             | 0.94128     |

|  | early_above_70 | early_aged_60_70 | early_below_55 | late_above_70 | late_aged_60_70 | late_below_55 | Probe ID  | Descripti... | Correlation |
|--|----------------|------------------|----------------|---------------|-----------------|---------------|-----------|--------------|-------------|
|  |                |                  |                |               |                 |               | AACS      |              | 0.97330     |
|  |                |                  |                |               |                 |               | ALG6      |              | 0.96253     |
|  |                |                  |                |               |                 |               | APH1B     |              | 0.98057     |
|  |                |                  |                |               |                 |               | B4GALT6   |              | 0.98627     |
|  |                |                  |                |               |                 |               | CDH1      |              | 0.94949     |
|  |                |                  |                |               |                 |               | CGNL1     |              | 0.94432     |
|  |                |                  |                |               |                 |               | COBL      |              | 0.92233     |
|  |                |                  |                |               |                 |               | COG3      |              | 0.95625     |
|  |                |                  |                |               |                 |               | DHCR24    |              | 0.96192     |
|  |                |                  |                |               |                 |               | DNAJC1    |              | 0.93598     |
|  |                |                  |                |               |                 |               | DNAJC3    |              | 0.95988     |
|  |                |                  |                |               |                 |               | EEF2K     |              | 0.98366     |
|  |                |                  |                |               |                 |               | EHHADH    |              | 0.91177     |
|  |                |                  |                |               |                 |               | FGF2      |              | 0.91344     |
|  |                |                  |                |               |                 |               | GPR63     |              | 0.97388     |
|  |                |                  |                |               |                 |               | GTF3C1    |              | 0.98837     |
|  |                |                  |                |               |                 |               | HEXB      |              | 0.94918     |
|  |                |                  |                |               |                 |               | HIVEP3    |              | 0.97007     |
|  |                |                  |                |               |                 |               | IQGAP2    |              | 0.98362     |
|  |                |                  |                |               |                 |               | LDLR      |              | 0.96441     |
|  |                |                  |                |               |                 |               | MANBA     |              | 0.99409     |
|  |                |                  |                |               |                 |               | NEDD4     |              | 0.95606     |
|  |                |                  |                |               |                 |               | NEO1      |              | 0.99794     |
|  |                |                  |                |               |                 |               | NIPAL3    |              | 0.95291     |
|  |                |                  |                |               |                 |               | PAFAH2    |              | 0.99233     |
|  |                |                  |                |               |                 |               | PCDH1     |              | 0.95950     |
|  |                |                  |                |               |                 |               | PCYOX1    |              | 0.98019     |
|  |                |                  |                |               |                 |               | PIGB      |              | 0.99528     |
|  |                |                  |                |               |                 |               | PLIN3     |              | 0.93878     |
|  |                |                  |                |               |                 |               | SCARB1    |              | 0.96922     |
|  |                |                  |                |               |                 |               | SLC4A4    |              | 0.86942     |
|  |                |                  |                |               |                 |               | SORD      |              | 0.99616     |
|  |                |                  |                |               |                 |               | SREK1IP1  |              | 0.95371     |
|  |                |                  |                |               |                 |               | TM9SF1    |              | 0.97561     |
|  |                |                  |                |               |                 |               | UGGT1     |              | 0.98736     |
|  |                |                  |                |               |                 |               | VEGFA     |              | 0.99661     |
|  |                |                  |                |               |                 |               | PPIL2     |              | 0.95238     |
|  |                |                  |                |               |                 |               | RBM47     |              | 0.98528     |
|  |                |                  |                |               |                 |               | SLIT1     |              | 0.96935     |
|  |                |                  |                |               |                 |               | AACS      |              | 0.97330     |
|  |                |                  |                |               |                 |               | ABCC4     |              | 0.94788     |
|  |                |                  |                |               |                 |               | ACOX3     |              | 0.98269     |
|  |                |                  |                |               |                 |               | ACSS3     |              | 0.93050     |
|  |                |                  |                |               |                 |               | ALDH3A2   |              | 0.97956     |
|  |                |                  |                |               |                 |               | ASAH1     |              | 0.94629     |
|  |                |                  |                |               |                 |               | B4GALT1   |              | 0.96509     |
|  |                |                  |                |               |                 |               | BBS4      |              | 0.97041     |
|  |                |                  |                |               |                 |               | C20orf194 |              | 0.99737     |
|  |                |                  |                |               |                 |               | CDKL2     |              | 0.94407     |
|  |                |                  |                |               |                 |               | CECR2     |              | 0.92113     |
|  |                |                  |                |               |                 |               | CLCC1     |              | 0.98165     |
|  |                |                  |                |               |                 |               | CTBS      |              | 0.98444     |
|  |                |                  |                |               |                 |               | EPN3      |              | 0.93170     |
|  |                |                  |                |               |                 |               | FRK       |              | 0.91873     |
|  |                |                  |                |               |                 |               | GPLD1     |              | 0.93334     |
|  |                |                  |                |               |                 |               | KIAA0513  |              | 0.97792     |
|  |                |                  |                |               |                 |               | LIFR      |              | 0.98467     |
|  |                |                  |                |               |                 |               | MAP2K4    |              | 0.96945     |
|  |                |                  |                |               |                 |               | MGAT4A    |              | 0.99413     |
|  |                |                  |                |               |                 |               | MTMR9     |              | 0.93323     |
|  |                |                  |                |               |                 |               | NEDD4L    |              | 0.93558     |
|  |                |                  |                |               |                 |               | PLA2R1    |              | 0.94823     |
|  |                |                  |                |               |                 |               | RABEP1    |              | 0.99740     |
|  |                |                  |                |               |                 |               | RHBDD1    |              | 0.97687     |
|  |                |                  |                |               |                 |               | RPN2      |              | 0.97593     |
|  |                |                  |                |               |                 |               | SLC2A12   |              | 0.90583     |
|  |                |                  |                |               |                 |               | SLC39A14  |              | 0.94164     |
|  |                |                  |                |               |                 |               | SLC7A2    |              | 0.98967     |
|  |                |                  |                |               |                 |               | SSR1      |              | 0.99009     |
|  |                |                  |                |               |                 |               | STT3A     |              | 0.97279     |
|  |                |                  |                |               |                 |               | TCTN3     |              | 0.98209     |
|  |                |                  |                |               |                 |               | TMEM59    |              | 0.99029     |
|  |                |                  |                |               |                 |               | TTC39A    |              | 0.97854     |
|  |                |                  |                |               |                 |               | ZBTB16    |              | 0.98340     |
|  |                |                  |                |               |                 |               | ZC3H12C   |              | 0.96463     |
|  |                |                  |                |               |                 |               | TMEM232   |              | 0.98293     |
|  |                |                  |                |               |                 |               | CALR      |              | 0.97119     |
|  |                |                  |                |               |                 |               | CCPG1     |              | 0.99038     |
|  |                |                  |                |               |                 |               | FXR2      |              | 0.96037     |
|  |                |                  |                |               |                 |               | LRRC28    |              | 0.94292     |
|  |                |                  |                |               |                 |               | SYT7      |              | 0.97302     |
|  |                |                  |                |               |                 |               | TSPYL1    |              | 0.98014     |
|  |                |                  |                |               |                 |               | ACOX1     |              | 0.98835     |
|  |                |                  |                |               |                 |               | ALDH1A3   |              | 0.98967     |
|  |                |                  |                |               |                 |               | ATMIN     |              | 0.96215     |
|  |                |                  |                |               |                 |               | C2orf16   |              | 0.86661     |
|  |                |                  |                |               |                 |               | CANT1     |              | 0.97828     |
|  |                |                  |                |               |                 |               | CNNM3     |              | 0.90869     |
|  |                |                  |                |               |                 |               | DHTKD1    |              | 0.91973     |
|  |                |                  |                |               |                 |               | DMXL1     |              | 0.93223     |
|  |                |                  |                |               |                 |               | EIF5B     |              | 0.97376     |
|  |                |                  |                |               |                 |               | ERMAP     |              | 0.98946     |
|  |                |                  |                |               |                 |               | KCND3     |              | 0.92492     |
|  |                |                  |                |               |                 |               | PCCA      |              | 0.98413     |
|  |                |                  |                |               |                 |               | PDP2      |              | 0.95790     |
|  |                |                  |                |               |                 |               | PIGG      |              | 0.95807     |
|  |                |                  |                |               |                 |               | PIGT      |              | 0.99541     |
|  |                |                  |                |               |                 |               | RTN4RL2   |              | 0.95857     |
|  |                |                  |                |               |                 |               | RUNDC1    |              | 0.98672     |
|  |                |                  |                |               |                 |               | SLC39A7   |              | 0.99873     |
|  |                |                  |                |               |                 |               | SLC44A4   |              | 0.99362     |
|  |                |                  |                |               |                 |               | SLC981    |              | 0.97523     |
|  |                |                  |                |               |                 |               | SYVN1     |              | 0.90503     |
|  |                |                  |                |               |                 |               | TK2       |              | 0.97347     |
|  |                |                  |                |               |                 |               | TMED10    |              | 0.98493     |

|  | early_above_70 | early_aged_60_70 | early_below_55 | late_above_70 | late_aged_60_70 | late_below_55 | Probe ID    | Description | Correlation |
|--|----------------|------------------|----------------|---------------|-----------------|---------------|-------------|-------------|-------------|
|  |                |                  |                |               |                 |               | ADAM8       |             | 0.96988     |
|  |                |                  |                |               |                 |               | CDH13       |             | 0.89197     |
|  |                |                  |                |               |                 |               | GAD1        |             | 0.98968     |
|  |                |                  |                |               |                 |               | KIFC3       |             | 0.94927     |
|  |                |                  |                |               |                 |               | MMP2        |             | 0.96871     |
|  |                |                  |                |               |                 |               | PHLDB1      |             | 0.97257     |
|  |                |                  |                |               |                 |               | ZFP36L2     |             | 0.79711     |
|  |                |                  |                |               |                 |               | ADAM23      |             | 0.86648     |
|  |                |                  |                |               |                 |               | ARHGAP22    |             | 0.88141     |
|  |                |                  |                |               |                 |               | BATF3       |             | 0.92311     |
|  |                |                  |                |               |                 |               | DOK5        |             | 0.98298     |
|  |                |                  |                |               |                 |               | ENG         |             | 0.99004     |
|  |                |                  |                |               |                 |               | NALCN       |             | 0.81713     |
|  |                |                  |                |               |                 |               | PCDHB7      |             | 0.97771     |
|  |                |                  |                |               |                 |               | RAB38       |             | 0.88732     |
|  |                |                  |                |               |                 |               | SCIP1       |             | 0.93918     |
|  |                |                  |                |               |                 |               | ST6GALNA... |             | 0.97617     |
|  |                |                  |                |               |                 |               | GLI1        |             | 0.99403     |
|  |                |                  |                |               |                 |               | ADAMTSL2    |             | 0.98938     |
|  |                |                  |                |               |                 |               | FLT3LG      |             | 0.93930     |
|  |                |                  |                |               |                 |               | SCARF2      |             | 0.89137     |
|  |                |                  |                |               |                 |               | STAC3       |             | 0.86235     |
|  |                |                  |                |               |                 |               | VIM         |             | 0.99193     |
|  |                |                  |                |               |                 |               | ABTB2       |             | 0.89206     |
|  |                |                  |                |               |                 |               | DENND4B     |             | 0.91289     |
|  |                |                  |                |               |                 |               | DNM1        |             | 0.98951     |
|  |                |                  |                |               |                 |               | ESAM        |             | 0.93886     |
|  |                |                  |                |               |                 |               | F2R         |             | 0.89805     |
|  |                |                  |                |               |                 |               | FZD2        |             | 0.93771     |
|  |                |                  |                |               |                 |               | GAS6        |             | 0.98565     |
|  |                |                  |                |               |                 |               | LAMC3       |             | 0.98387     |
|  |                |                  |                |               |                 |               | LTBP3       |             | 0.93995     |
|  |                |                  |                |               |                 |               | MTMR11      |             | 0.98430     |
|  |                |                  |                |               |                 |               | NXNL2       |             | 0.74205     |
|  |                |                  |                |               |                 |               | PDE4C       |             | 0.90632     |
|  |                |                  |                |               |                 |               | PODNL1      |             | 0.93910     |
|  |                |                  |                |               |                 |               | PRELP       |             | 0.97014     |
|  |                |                  |                |               |                 |               | SEMA3G      |             | 0.94249     |
|  |                |                  |                |               |                 |               | TLL3        |             | 0.84247     |

|  | early_above_70 | early_aged_60_70 | early_below_55 | late_above_70 | late_aged_60_70 | late_below_55 | Probe ID | Description | Correlation |
|--|----------------|------------------|----------------|---------------|-----------------|---------------|----------|-------------|-------------|
|  |                |                  |                |               |                 |               | ANK3     |             | 0.96109     |
|  |                |                  |                |               |                 |               | GNAL     |             | 0.95589     |
|  |                |                  |                |               |                 |               | HOXA9    |             | 0.90493     |
|  |                |                  |                |               |                 |               | SORBS1   |             | 0.98878     |
|  |                |                  |                |               |                 |               | TXNDC16  |             | 0.87517     |
|  |                |                  |                |               |                 |               | MSRB3    |             | 0.95720     |
|  |                |                  |                |               |                 |               | MYRIP    |             | 0.96648     |
|  |                |                  |                |               |                 |               | KLF8     |             | 0.99933     |
|  |                |                  |                |               |                 |               | MCEE     |             | 0.97394     |
|  |                |                  |                |               |                 |               | PDE3B    |             | 0.99182     |
|  |                |                  |                |               |                 |               | PMFBP1   |             | 0.56136     |
|  |                |                  |                |               |                 |               | AMACR    |             | 0.94641     |
|  |                |                  |                |               |                 |               | FUT4     |             | 0.95698     |
|  |                |                  |                |               |                 |               | AFAP1L2  |             | 0.86124     |
|  |                |                  |                |               |                 |               | ANKRA2   |             | 0.97368     |
|  |                |                  |                |               |                 |               | CCDC30   |             | 0.91765     |
|  |                |                  |                |               |                 |               | HENMT1   |             | 0.87539     |
|  |                |                  |                |               |                 |               | LDLRAD3  |             | 0.96734     |
|  |                |                  |                |               |                 |               | NHLRC1   |             | 0.93930     |
|  |                |                  |                |               |                 |               | PHOSPHO2 |             | 0.95312     |
|  |                |                  |                |               |                 |               | PLEKHH1  |             | 0.98375     |
|  |                |                  |                |               |                 |               | SAMD5    |             | 0.96303     |
|  |                |                  |                |               |                 |               | SEC11C   |             | 0.89955     |
|  |                |                  |                |               |                 |               | ZNF785   |             | 0.98114     |

|  | early_above_70 | early_aged_60_70 | early_below_55 | late_above_70 | late_aged_60_70 | late_below_55 | Probe ID | Descripti... | Correlation |
|--|----------------|------------------|----------------|---------------|-----------------|---------------|----------|--------------|-------------|
|  |                |                  |                |               |                 |               | APIAR    |              | 0.92967     |
|  |                |                  |                |               |                 |               | ASAP2    |              | 0.94892     |
|  |                |                  |                |               |                 |               | FAM117B  |              | 0.92504     |
|  |                |                  |                |               |                 |               | FSIP1    |              | 0.86496     |
|  |                |                  |                |               |                 |               | GNAS     |              | 0.95293     |
|  |                |                  |                |               |                 |               | LACTB    |              | 0.93284     |
|  |                |                  |                |               |                 |               | LDHA     |              | 0.97982     |
|  |                |                  |                |               |                 |               | LPIN1    |              | 0.83441     |
|  |                |                  |                |               |                 |               | LPXN     |              | 0.95649     |
|  |                |                  |                |               |                 |               | NREP     |              | 0.93131     |
|  |                |                  |                |               |                 |               | NRN1     |              | 0.93709     |
|  |                |                  |                |               |                 |               | NRP1     |              | 0.96081     |
|  |                |                  |                |               |                 |               | PCNP     |              | 0.94736     |
|  |                |                  |                |               |                 |               | SNX3     |              | 0.93248     |
|  |                |                  |                |               |                 |               | SPAG1    |              | 0.95161     |
|  |                |                  |                |               |                 |               | TEAD2    |              | 0.89672     |
|  |                |                  |                |               |                 |               | TMEM163  |              | 0.75663     |
|  |                |                  |                |               |                 |               | ZFAND5   |              | 0.95688     |
|  |                |                  |                |               |                 |               | ZFP37    |              | 0.90067     |
|  |                |                  |                |               |                 |               | ARL6IP1  |              | 0.83851     |
|  |                |                  |                |               |                 |               | ARHGEF3  |              | 0.93996     |
|  |                |                  |                |               |                 |               | DBN1     |              | 0.97517     |
|  |                |                  |                |               |                 |               | RAD51B   |              | 0.97158     |
|  |                |                  |                |               |                 |               | AMMECR1  |              | 0.91203     |
|  |                |                  |                |               |                 |               | ANKRD29  |              | 0.95277     |
|  |                |                  |                |               |                 |               | ARMC1    |              | 0.91004     |
|  |                |                  |                |               |                 |               | CHORDC1  |              | 0.93968     |
|  |                |                  |                |               |                 |               | CLCN4    |              | 0.88667     |
|  |                |                  |                |               |                 |               | CRTAM    |              | 0.94792     |
|  |                |                  |                |               |                 |               | DCLK1    |              | 0.83217     |
|  |                |                  |                |               |                 |               | DNAH8    |              | 0.96746     |
|  |                |                  |                |               |                 |               | ENAH     |              | 0.96535     |
|  |                |                  |                |               |                 |               | FAP      |              | 0.90898     |
|  |                |                  |                |               |                 |               | GPR137B  |              | 0.99027     |
|  |                |                  |                |               |                 |               | LAPTM4B  |              | 0.92072     |
|  |                |                  |                |               |                 |               | NGEF     |              | 0.91048     |
|  |                |                  |                |               |                 |               | PARP1    |              | 0.94060     |
|  |                |                  |                |               |                 |               | PDGFRL   |              | 0.95234     |
|  |                |                  |                |               |                 |               | PMP22    |              | 0.90465     |
|  |                |                  |                |               |                 |               | PRKAR2B  |              | 0.87438     |
|  |                |                  |                |               |                 |               | PROCR    |              | 0.90974     |
|  |                |                  |                |               |                 |               | SCLT1    |              | 0.96377     |
|  |                |                  |                |               |                 |               | SEC11A   |              | 0.87739     |
|  |                |                  |                |               |                 |               | SIX4     |              | 0.93078     |
|  |                |                  |                |               |                 |               | SLCO4A1  |              | 0.94003     |
|  |                |                  |                |               |                 |               | SMC3     |              | 0.79799     |
|  |                |                  |                |               |                 |               | STX6     |              | 0.96549     |
|  |                |                  |                |               |                 |               | TPM3     |              | 0.96869     |
|  |                |                  |                |               |                 |               | ZFH4     |              | 0.87625     |
|  |                |                  |                |               |                 |               | ZNF541   |              | 0.95848     |
|  |                |                  |                |               |                 |               | ARL6IP6  |              | 0.95191     |
|  |                |                  |                |               |                 |               | THAP2    |              | 0.97060     |
|  |                |                  |                |               |                 |               | CASP3    |              | 0.98430     |
|  |                |                  |                |               |                 |               | DDIT4    |              | 0.91870     |
|  |                |                  |                |               |                 |               | FKBP1A   |              | 0.89131     |
|  |                |                  |                |               |                 |               | MEX3B    |              | 0.92594     |
|  |                |                  |                |               |                 |               | SIAH1    |              | 0.97340     |
|  |                |                  |                |               |                 |               | UBE2V2   |              | 0.94802     |
|  |                |                  |                |               |                 |               | ADAMTSL1 |              | 0.90240     |
|  |                |                  |                |               |                 |               | AATK     |              | 0.91239     |
|  |                |                  |                |               |                 |               | ALDOC    |              | 0.96298     |
|  |                |                  |                |               |                 |               | ANKRD46  |              | 0.95912     |
|  |                |                  |                |               |                 |               | ARPC5    |              | 0.96148     |
|  |                |                  |                |               |                 |               | CACNB1   |              | 0.90545     |
|  |                |                  |                |               |                 |               | DNASE2   |              | 0.96348     |
|  |                |                  |                |               |                 |               | DUSP7    |              | 0.87854     |
|  |                |                  |                |               |                 |               | HSF2BP   |              | 0.95658     |
|  |                |                  |                |               |                 |               | ISL2     |              | 0.94964     |
|  |                |                  |                |               |                 |               | KIF7     |              | 0.87020     |
|  |                |                  |                |               |                 |               | MEAF6    |              | 0.87046     |
|  |                |                  |                |               |                 |               | MITD1    |              | 0.89643     |
|  |                |                  |                |               |                 |               | MLLT11   |              | 0.96716     |
|  |                |                  |                |               |                 |               | RAB33B   |              | 0.99235     |
|  |                |                  |                |               |                 |               | SNAPC3   |              | 0.72352     |
|  |                |                  |                |               |                 |               | SOLE     |              | 0.92184     |
|  |                |                  |                |               |                 |               | SSTR1    |              | 0.94805     |
|  |                |                  |                |               |                 |               | TXNRD1   |              | 0.89763     |
|  |                |                  |                |               |                 |               | UAP1L1   |              | 0.93121     |
|  |                |                  |                |               |                 |               | VWA7     |              | 0.90449     |
|  |                |                  |                |               |                 |               | YWHAZ    |              | 0.94837     |
|  |                |                  |                |               |                 |               | ZNF467   |              | 0.93247     |

|  | early_above_70 | early_aged_60_70 | early_below_55 | late_above_70 | late_aged_60_70 | late_below_55 | Probe ID | Description | Correlation |
|--|----------------|------------------|----------------|---------------|-----------------|---------------|----------|-------------|-------------|
|  |                |                  |                |               |                 |               | ETS1     |             | 0.97955     |
|  |                |                  |                |               |                 |               | PPP2R5A  |             | 0.94461     |
|  |                |                  |                |               |                 |               | ABCA6    |             | 0.98571     |
|  |                |                  |                |               |                 |               | CLEC1A   |             | 0.98164     |
|  |                |                  |                |               |                 |               | EPHA3    |             | 0.98627     |
|  |                |                  |                |               |                 |               | GNB4     |             | 0.96173     |
|  |                |                  |                |               |                 |               | IL33     |             | 0.96849     |
|  |                |                  |                |               |                 |               | IQCA1    |             | 0.88783     |
|  |                |                  |                |               |                 |               | MKX      |             | 0.92339     |
|  |                |                  |                |               |                 |               | MRAS     |             | 0.98944     |
|  |                |                  |                |               |                 |               | PLCL2    |             | 0.97492     |
|  |                |                  |                |               |                 |               | PRKCQ    |             | 0.99176     |
|  |                |                  |                |               |                 |               | PTPRE    |             | 0.97318     |
|  |                |                  |                |               |                 |               | SLC1A2   |             | 0.98510     |
|  |                |                  |                |               |                 |               | USP31    |             | 0.93907     |
|  |                |                  |                |               |                 |               | APLP1    |             | 0.97334     |
|  |                |                  |                |               |                 |               | BEST1    |             | 0.97401     |
|  |                |                  |                |               |                 |               | PCNT     |             | 0.97943     |



|  | early_above_70 | early_aged_60_70 | early_below_55 | late_above_70 | late_aged_60_70 | late_below_55 | Probe ID | Descripti... | Correlation |
|--|----------------|------------------|----------------|---------------|-----------------|---------------|----------|--------------|-------------|
|  |                |                  |                |               |                 |               | ABLIM1   |              | 0.84726     |
|  |                |                  |                |               |                 |               | C1orf159 |              | 0.98646     |
|  |                |                  |                |               |                 |               | C7orf50  |              | 0.96979     |
|  |                |                  |                |               |                 |               | CCNB1IP1 |              | 0.99211     |
|  |                |                  |                |               |                 |               | CLTA     |              | 0.97315     |
|  |                |                  |                |               |                 |               | DAZAP1   |              | 0.98560     |
|  |                |                  |                |               |                 |               | HIGD2A   |              | 0.95572     |
|  |                |                  |                |               |                 |               | HOXA2    |              | 0.95524     |
|  |                |                  |                |               |                 |               | ITGB3BP  |              | 0.93002     |
|  |                |                  |                |               |                 |               | LRGUK    |              | 0.95949     |
|  |                |                  |                |               |                 |               | POLE4    |              | 0.98056     |
|  |                |                  |                |               |                 |               | RBM6     |              | 0.92836     |
|  |                |                  |                |               |                 |               | RPL18A   |              | 0.95067     |
|  |                |                  |                |               |                 |               | SFSWAP   |              | 0.99220     |
|  |                |                  |                |               |                 |               | SNRPA1   |              | 0.96307     |
|  |                |                  |                |               |                 |               | TRMT1    |              | 0.97103     |
|  |                |                  |                |               |                 |               | UBXN11   |              | 0.97226     |
|  |                |                  |                |               |                 |               | CCDC84   |              | 0.98747     |
|  |                |                  |                |               |                 |               | MST1     |              | 0.96973     |
|  |                |                  |                |               |                 |               | NPM1     |              | 0.91205     |
|  |                |                  |                |               |                 |               | PSPN     |              | 0.89209     |
|  |                |                  |                |               |                 |               | SNRPD2   |              | 0.98820     |
|  |                |                  |                |               |                 |               | EXOSC4   |              | 0.98709     |
|  |                |                  |                |               |                 |               | PPIH     |              | 0.97275     |
|  |                |                  |                |               |                 |               | PPP1R14B |              | 0.95720     |
|  |                |                  |                |               |                 |               | RPS27    |              | 0.96083     |
|  |                |                  |                |               |                 |               | UQCRH    |              | 0.96224     |
|  |                |                  |                |               |                 |               | CHTF18   |              | 0.96913     |
|  |                |                  |                |               |                 |               | CTU1     |              | 0.98814     |
|  |                |                  |                |               |                 |               | GYPC     |              | 0.92854     |
|  |                |                  |                |               |                 |               | LUC7L    |              | 0.85212     |
|  |                |                  |                |               |                 |               | MEST     |              | 0.98196     |
|  |                |                  |                |               |                 |               | NPHP3    |              | 0.90484     |
|  |                |                  |                |               |                 |               | NRXN2    |              | 0.88938     |
|  |                |                  |                |               |                 |               | PBX4     |              | 0.81612     |
|  |                |                  |                |               |                 |               | STX1A    |              | 0.96281     |
|  |                |                  |                |               |                 |               | TELO2    |              | 0.97375     |
|  |                |                  |                |               |                 |               | TRPM5    |              | 0.82452     |
|  |                |                  |                |               |                 |               | CDK2AP2  |              | 0.97419     |
|  |                |                  |                |               |                 |               | CCDC7    |              | 0.90382     |
|  |                |                  |                |               |                 |               | HES4     |              | 0.94291     |
|  |                |                  |                |               |                 |               | AP4M1    |              | 0.94214     |
|  |                |                  |                |               |                 |               | BCL2L12  |              | 0.91287     |
|  |                |                  |                |               |                 |               | C1orf35  |              | 0.86422     |
|  |                |                  |                |               |                 |               | CCNL2    |              | 0.90571     |
|  |                |                  |                |               |                 |               | CEMP1    |              | 0.97988     |
|  |                |                  |                |               |                 |               | COPS6    |              | 0.96131     |
|  |                |                  |                |               |                 |               | DDX56    |              | 0.98766     |
|  |                |                  |                |               |                 |               | EPOR     |              | 0.97691     |
|  |                |                  |                |               |                 |               | LSM7     |              | 0.96528     |
|  |                |                  |                |               |                 |               | LTB4R    |              | 0.95827     |
|  |                |                  |                |               |                 |               | MAMDC4   |              | 0.98815     |
|  |                |                  |                |               |                 |               | MAPK8IP3 |              | 0.69598     |
|  |                |                  |                |               |                 |               | MCM7     |              | 0.92935     |
|  |                |                  |                |               |                 |               | MRPL11   |              | 0.94455     |
|  |                |                  |                |               |                 |               | NDUFS6   |              | 0.95443     |
|  |                |                  |                |               |                 |               | NXT1     |              | 0.98618     |
|  |                |                  |                |               |                 |               | POLR1D   |              | 0.97592     |
|  |                |                  |                |               |                 |               | RAC3     |              | 0.96326     |
|  |                |                  |                |               |                 |               | RNASEH2C |              | 0.95812     |
|  |                |                  |                |               |                 |               | ROMO1    |              | 0.88425     |
|  |                |                  |                |               |                 |               | SHARPIN  |              | 0.97736     |
|  |                |                  |                |               |                 |               | SIVA1    |              | 0.94387     |
|  |                |                  |                |               |                 |               | SLC39A4  |              | 0.99558     |
|  |                |                  |                |               |                 |               | TCHH     |              | 0.97543     |
|  |                |                  |                |               |                 |               | TEX22    |              | 0.96640     |
|  |                |                  |                |               |                 |               | TOMM22   |              | 0.97462     |
|  |                |                  |                |               |                 |               | TOMM7    |              | 0.97830     |
|  |                |                  |                |               |                 |               | UNC5CL   |              | 0.86280     |
|  |                |                  |                |               |                 |               | WFIKK1   |              | 0.91152     |
|  |                |                  |                |               |                 |               | ZNF205   |              | 0.97023     |

|  | early_above_70 | early_aged_60_70 | early_below_55 | late_above_70 | late_aged_60_70 | late_below_55 | Probe ID | Description | Correlation |
|--|----------------|------------------|----------------|---------------|-----------------|---------------|----------|-------------|-------------|
|  |                |                  |                |               |                 |               | AOAH     |             | 0.94856     |
|  |                |                  |                |               |                 |               | CSF3R    |             | 0.93173     |
|  |                |                  |                |               |                 |               | ESYT1    |             | 0.95465     |
|  |                |                  |                |               |                 |               | IQCG     |             | 0.98706     |
|  |                |                  |                |               |                 |               | KCNC3    |             | 0.98007     |
|  |                |                  |                |               |                 |               | LNK2     |             | 0.96944     |
|  |                |                  |                |               |                 |               | MET      |             | 0.96465     |
|  |                |                  |                |               |                 |               | NFATC1   |             | 0.98993     |
|  |                |                  |                |               |                 |               | NOP14    |             | 0.94655     |
|  |                |                  |                |               |                 |               | PIP4K2A  |             | 0.99026     |
|  |                |                  |                |               |                 |               | PODXL    |             | 0.96446     |
|  |                |                  |                |               |                 |               | RNF145   |             | 0.97353     |
|  |                |                  |                |               |                 |               | RNF19B   |             | 0.98954     |
|  |                |                  |                |               |                 |               | SLC39A11 |             | 0.93737     |
|  |                |                  |                |               |                 |               | SWAP70   |             | 0.96711     |
|  |                |                  |                |               |                 |               | FILIP1L  |             | 0.97603     |
|  |                |                  |                |               |                 |               | MCL1     |             | 0.98871     |
|  |                |                  |                |               |                 |               | AK5      |             | 0.97709     |
|  |                |                  |                |               |                 |               | BMP2K    |             | 0.98287     |
|  |                |                  |                |               |                 |               | CAMKK1   |             | 0.94240     |
|  |                |                  |                |               |                 |               | CDK5RAP2 |             | 0.99486     |
|  |                |                  |                |               |                 |               | DUSP10   |             | 0.90074     |
|  |                |                  |                |               |                 |               | ENTPD1   |             | 0.96637     |
|  |                |                  |                |               |                 |               | EPHA6    |             | 0.86880     |
|  |                |                  |                |               |                 |               | KMO      |             | 0.92176     |
|  |                |                  |                |               |                 |               | LCA5L    |             | 0.97699     |
|  |                |                  |                |               |                 |               | NOX1     |             | 0.96202     |
|  |                |                  |                |               |                 |               | PCDH17   |             | 0.96248     |
|  |                |                  |                |               |                 |               | PLXNA3   |             | 0.99110     |
|  |                |                  |                |               |                 |               | PRKG2    |             | 0.93519     |
|  |                |                  |                |               |                 |               | RASGEF1B |             | 0.92552     |
|  |                |                  |                |               |                 |               | RUNDC3B  |             | 0.98334     |
|  |                |                  |                |               |                 |               | ST8SIA1  |             | 0.93935     |
|  |                |                  |                |               |                 |               | DLC1     |             | 0.98488     |
|  |                |                  |                |               |                 |               | FLJ1     |             | 0.99730     |
|  |                |                  |                |               |                 |               | BCL9L    |             | 0.95452     |
|  |                |                  |                |               |                 |               | CLPB     |             | 0.98841     |
|  |                |                  |                |               |                 |               | CXCL16   |             | 0.99284     |
|  |                |                  |                |               |                 |               | FRMD3    |             | 0.97613     |
|  |                |                  |                |               |                 |               | LGALS2   |             | 0.98442     |
|  |                |                  |                |               |                 |               | RDH10    |             | 0.92237     |
|  |                |                  |                |               |                 |               | TBC1D2B  |             | 0.97302     |
|  |                |                  |                |               |                 |               | TNXB     |             | 0.92673     |

|  | early_above_70 | early_aged_60_70 | early_below_55 | late_above_70 | late_aged_60_70 | late_below_55 | Probe ID | Description | Correlation |
|--|----------------|------------------|----------------|---------------|-----------------|---------------|----------|-------------|-------------|
|  |                |                  |                |               |                 |               | ADAM15   |             | 0.98442     |
|  |                |                  |                |               |                 |               | AMOTL2   |             | 0.98009     |
|  |                |                  |                |               |                 |               | BIRC3    |             | 0.96683     |
|  |                |                  |                |               |                 |               | C3orf52  |             | 0.99492     |
|  |                |                  |                |               |                 |               | CHST9    |             | 0.82761     |
|  |                |                  |                |               |                 |               | GCDH     |             | 0.85945     |
|  |                |                  |                |               |                 |               | NCOA7    |             | 0.95389     |
|  |                |                  |                |               |                 |               | TJP3     |             | 0.96163     |
|  |                |                  |                |               |                 |               | PMEL     |             | 0.94384     |
|  |                |                  |                |               |                 |               | APOB     |             | 0.88217     |
|  |                |                  |                |               |                 |               | ICAM1    |             | 0.95925     |
|  |                |                  |                |               |                 |               | MMP7     |             | 0.92406     |
|  |                |                  |                |               |                 |               | OLFML3   |             | 0.84743     |
|  |                |                  |                |               |                 |               | PTGES    |             | 0.93633     |
|  |                |                  |                |               |                 |               | RARRES1  |             | 0.93030     |
|  |                |                  |                |               |                 |               | SESN2    |             | 0.91673     |
|  |                |                  |                |               |                 |               | SIPA1L2  |             | 0.93369     |
|  |                |                  |                |               |                 |               | TLL1     |             | 0.88537     |
|  |                |                  |                |               |                 |               | CPEB1    |             | 0.87642     |
|  |                |                  |                |               |                 |               | ESRRB    |             | 0.89593     |
|  |                |                  |                |               |                 |               | APOBR    |             | 0.89904     |
|  |                |                  |                |               |                 |               | C2CD2L   |             | 0.94878     |
|  |                |                  |                |               |                 |               | CTSD     |             | 0.96419     |
|  |                |                  |                |               |                 |               | CYP26B1  |             | 0.92217     |
|  |                |                  |                |               |                 |               | EHD1     |             | 0.83117     |
|  |                |                  |                |               |                 |               | HAS3     |             | 0.88161     |
|  |                |                  |                |               |                 |               | LETM1    |             | 0.95679     |
|  |                |                  |                |               |                 |               | MACC1    |             | 0.82843     |
|  |                |                  |                |               |                 |               | MEIG1    |             | 0.82368     |
|  |                |                  |                |               |                 |               | PRSS22   |             | 0.88347     |
|  |                |                  |                |               |                 |               | PTGER4   |             | 0.83394     |
|  |                |                  |                |               |                 |               | RSPH1    |             | 0.67202     |
|  |                |                  |                |               |                 |               | SRGAP1   |             | 0.87123     |

|  | early_above_70 | early_aged_60_70 | early_below_55 | late_above_70 | late_aged_60_70 | late_below_55 | Probe ID  | Descripti... | Correlation |
|--|----------------|------------------|----------------|---------------|-----------------|---------------|-----------|--------------|-------------|
|  |                |                  |                |               |                 |               | AHNAK     |              | 0.99248     |
|  |                |                  |                |               |                 |               | AMBRA1    |              | 0.98198     |
|  |                |                  |                |               |                 |               | ANKH      |              | 0.97411     |
|  |                |                  |                |               |                 |               | BTN3A3    |              | 0.92561     |
|  |                |                  |                |               |                 |               | CCR6      |              | 0.98580     |
|  |                |                  |                |               |                 |               | CIC       |              | 0.91320     |
|  |                |                  |                |               |                 |               | CMIP      |              | 0.95589     |
|  |                |                  |                |               |                 |               | CRIM1     |              | 0.93423     |
|  |                |                  |                |               |                 |               | DENND3    |              | 0.96815     |
|  |                |                  |                |               |                 |               | DOCK4     |              | 0.96101     |
|  |                |                  |                |               |                 |               | DOCK8     |              | 0.98600     |
|  |                |                  |                |               |                 |               | DSE       |              | 0.95555     |
|  |                |                  |                |               |                 |               | EVI5      |              | 0.98529     |
|  |                |                  |                |               |                 |               | FAR2      |              | 0.97207     |
|  |                |                  |                |               |                 |               | GIPC2     |              | 0.98396     |
|  |                |                  |                |               |                 |               | GLCE      |              | 0.97824     |
|  |                |                  |                |               |                 |               | GLIS3     |              | 0.96852     |
|  |                |                  |                |               |                 |               | MEF2D     |              | 0.97940     |
|  |                |                  |                |               |                 |               | MFSD11    |              | 0.98799     |
|  |                |                  |                |               |                 |               | NAMPT     |              | 0.95627     |
|  |                |                  |                |               |                 |               | PCSK5     |              | 0.94591     |
|  |                |                  |                |               |                 |               | PTPN14    |              | 0.95589     |
|  |                |                  |                |               |                 |               | RAB11FIP5 |              | 0.98111     |
|  |                |                  |                |               |                 |               | RNF125    |              | 0.93775     |
|  |                |                  |                |               |                 |               | SHROOM3   |              | 0.94657     |
|  |                |                  |                |               |                 |               | SRCAP     |              | 0.94450     |
|  |                |                  |                |               |                 |               | TCF20     |              | 0.95218     |
|  |                |                  |                |               |                 |               | TMEM127   |              | 0.99384     |
|  |                |                  |                |               |                 |               | TMEM88    |              | 0.94093     |
|  |                |                  |                |               |                 |               | TNFAIP1   |              | 0.95987     |
|  |                |                  |                |               |                 |               | TSGA10    |              | 0.96817     |
|  |                |                  |                |               |                 |               | TSPAN15   |              | 0.93934     |
|  |                |                  |                |               |                 |               | USP13     |              | 0.96579     |
|  |                |                  |                |               |                 |               | VPS41     |              | 0.96102     |
|  |                |                  |                |               |                 |               | ZNFX1     |              | 0.98734     |
|  |                |                  |                |               |                 |               | ZZEF1     |              | 0.98034     |
|  |                |                  |                |               |                 |               | EXT1      |              | 0.95041     |
|  |                |                  |                |               |                 |               | HEG1      |              | 0.94915     |
|  |                |                  |                |               |                 |               | STIM1     |              | 0.94668     |
|  |                |                  |                |               |                 |               | C2CD2     |              | 0.94098     |
|  |                |                  |                |               |                 |               | CCNB3     |              | 0.98158     |
|  |                |                  |                |               |                 |               | CLEC16A   |              | 0.95275     |
|  |                |                  |                |               |                 |               | CLTCL1    |              | 0.96445     |
|  |                |                  |                |               |                 |               | CTSH      |              | 0.98737     |
|  |                |                  |                |               |                 |               | DST       |              | 0.96738     |
|  |                |                  |                |               |                 |               | HDLBP     |              | 0.94289     |
|  |                |                  |                |               |                 |               | HSPA2     |              | 0.96319     |
|  |                |                  |                |               |                 |               | KIF3B     |              | 0.93283     |
|  |                |                  |                |               |                 |               | LEPR      |              | 0.93560     |
|  |                |                  |                |               |                 |               | MAP2K5    |              | 0.93535     |
|  |                |                  |                |               |                 |               | NBAS      |              | 0.98980     |
|  |                |                  |                |               |                 |               | OSMR      |              | 0.97857     |
|  |                |                  |                |               |                 |               | PLAGL1    |              | 0.91523     |
|  |                |                  |                |               |                 |               | PLXDC2    |              | 0.99151     |
|  |                |                  |                |               |                 |               | POLR1A    |              | 0.98952     |
|  |                |                  |                |               |                 |               | PYGL      |              | 0.95556     |
|  |                |                  |                |               |                 |               | SCN1B     |              | 0.91512     |
|  |                |                  |                |               |                 |               | SPTLC2    |              | 0.97040     |
|  |                |                  |                |               |                 |               | WARS2     |              | 0.95181     |
|  |                |                  |                |               |                 |               | ZNF214    |              | 0.96527     |
|  |                |                  |                |               |                 |               | MINK1     |              | 0.99622     |
|  |                |                  |                |               |                 |               | ATXN2     |              | 0.98916     |
|  |                |                  |                |               |                 |               | KLHL21    |              | 0.96936     |
|  |                |                  |                |               |                 |               | COL14A1   |              | 0.97000     |
|  |                |                  |                |               |                 |               | AGPAT3    |              | 0.96494     |
|  |                |                  |                |               |                 |               | ALAS1     |              | 0.94140     |
|  |                |                  |                |               |                 |               | ANKRD52   |              | 0.98920     |
|  |                |                  |                |               |                 |               | APBB2     |              | 0.99870     |
|  |                |                  |                |               |                 |               | ATG2A     |              | 0.98414     |
|  |                |                  |                |               |                 |               | CRAT      |              | 0.92895     |
|  |                |                  |                |               |                 |               | EBF1      |              | 0.97015     |
|  |                |                  |                |               |                 |               | IPO13     |              | 0.98595     |
|  |                |                  |                |               |                 |               | KIAA0100  |              | 0.94736     |
|  |                |                  |                |               |                 |               | KIAA1522  |              | 0.92654     |
|  |                |                  |                |               |                 |               | KLHL26    |              | 0.92051     |
|  |                |                  |                |               |                 |               | LZTR1     |              | 0.89504     |
|  |                |                  |                |               |                 |               | MAN2A2    |              | 0.94020     |
|  |                |                  |                |               |                 |               | MAP3K3    |              | 0.96447     |
|  |                |                  |                |               |                 |               | NAV2      |              | 0.98311     |
|  |                |                  |                |               |                 |               | PITRM1    |              | 0.97352     |
|  |                |                  |                |               |                 |               | PTPN23    |              | 0.97641     |
|  |                |                  |                |               |                 |               | RIMKLB    |              | 0.93081     |
|  |                |                  |                |               |                 |               | RNF213    |              | 0.97710     |
|  |                |                  |                |               |                 |               | SLC38A9   |              | 0.95634     |
|  |                |                  |                |               |                 |               | SLFN5     |              | 0.96734     |
|  |                |                  |                |               |                 |               | TAF3      |              | 0.98487     |
|  |                |                  |                |               |                 |               | XRRA1     |              | 0.96546     |
|  |                |                  |                |               |                 |               | ZHX3      |              | 0.91432     |

|  | early_above_70 | early_aged_60_70 | early_below_55 | late_above_70 | late_aged_60_70 | late_below_55 | Probe ID | Descripti... | Correlation |
|--|----------------|------------------|----------------|---------------|-----------------|---------------|----------|--------------|-------------|
|  |                |                  |                |               |                 |               | ABCB1    |              | 0.88777     |
|  |                |                  |                |               |                 |               | ADAM22   |              | 0.94451     |
|  |                |                  |                |               |                 |               | ARHGAP31 |              | 0.95995     |
|  |                |                  |                |               |                 |               | BHLHE41  |              | 0.93309     |
|  |                |                  |                |               |                 |               | CADPS2   |              | 0.96777     |
|  |                |                  |                |               |                 |               | DAB2     |              | 0.98729     |
|  |                |                  |                |               |                 |               | DDHD1    |              | 0.97606     |
|  |                |                  |                |               |                 |               | DEPDC5   |              | 0.99047     |
|  |                |                  |                |               |                 |               | DGKD     |              | 0.98868     |
|  |                |                  |                |               |                 |               | DNAJC5   |              | 0.95886     |
|  |                |                  |                |               |                 |               | DSTYK    |              | 0.94329     |
|  |                |                  |                |               |                 |               | EGFR     |              | 0.94284     |
|  |                |                  |                |               |                 |               | GLI2     |              | 0.87148     |
|  |                |                  |                |               |                 |               | IQSEC1   |              | 0.97419     |
|  |                |                  |                |               |                 |               | PAN2     |              | 0.74138     |
|  |                |                  |                |               |                 |               | RGL1     |              | 0.94024     |
|  |                |                  |                |               |                 |               | RPAP1    |              | 0.91378     |
|  |                |                  |                |               |                 |               | RUNX1T1  |              | 0.93585     |
|  |                |                  |                |               |                 |               | RUNX2    |              | 0.89730     |
|  |                |                  |                |               |                 |               | SLC45A4  |              | 0.90033     |
|  |                |                  |                |               |                 |               | TMCC3    |              | 0.85620     |
|  |                |                  |                |               |                 |               | WDR19    |              | 0.95769     |
|  |                |                  |                |               |                 |               | XPR1     |              | 0.97297     |
|  |                |                  |                |               |                 |               | ZCCHC14  |              | 0.93216     |
|  |                |                  |                |               |                 |               | ZFYVE26  |              | 0.95250     |
|  |                |                  |                |               |                 |               | SLC3A2   |              | 0.99292     |
|  |                |                  |                |               |                 |               | GBA2     |              | 0.98808     |
|  |                |                  |                |               |                 |               | INSR     |              | 0.94551     |
|  |                |                  |                |               |                 |               | PATL2    |              | 0.91273     |
|  |                |                  |                |               |                 |               | PRKCE    |              | 0.92677     |
|  |                |                  |                |               |                 |               | SNED1    |              | 0.90744     |
|  |                |                  |                |               |                 |               | STARD9   |              | 0.93399     |
|  |                |                  |                |               |                 |               | ZFYVE28  |              | 0.93806     |
|  |                |                  |                |               |                 |               | FAF1     |              | 0.97490     |
|  |                |                  |                |               |                 |               | AASS     |              | 0.81734     |
|  |                |                  |                |               |                 |               | ABCC9    |              | 0.95389     |
|  |                |                  |                |               |                 |               | ALX3     |              | 0.91507     |
|  |                |                  |                |               |                 |               | ARAP2    |              | 0.93844     |
|  |                |                  |                |               |                 |               | ARHGEF17 |              | 0.97629     |
|  |                |                  |                |               |                 |               | CALCOCO1 |              | 0.98720     |
|  |                |                  |                |               |                 |               | COL6A2   |              | 0.92920     |
|  |                |                  |                |               |                 |               | CREBBP   |              | 0.94191     |
|  |                |                  |                |               |                 |               | CUBN     |              | 0.96883     |
|  |                |                  |                |               |                 |               | H6PD     |              | 0.96403     |
|  |                |                  |                |               |                 |               | HACL1    |              | 0.89720     |
|  |                |                  |                |               |                 |               | ITGA8    |              | 0.97132     |
|  |                |                  |                |               |                 |               | KLHL3    |              | 0.98874     |
|  |                |                  |                |               |                 |               | NKD1     |              | 0.96495     |
|  |                |                  |                |               |                 |               | NOTCH1   |              | 0.80952     |
|  |                |                  |                |               |                 |               | PCDH10   |              | 0.98496     |
|  |                |                  |                |               |                 |               | PEX5L    |              | 0.92705     |
|  |                |                  |                |               |                 |               | RAB15    |              | 0.96442     |
|  |                |                  |                |               |                 |               | RASGRF2  |              | 0.96693     |
|  |                |                  |                |               |                 |               | SLC46A1  |              | 0.91128     |
|  |                |                  |                |               |                 |               | SPEN     |              | 0.98084     |
|  |                |                  |                |               |                 |               | SPTB     |              | 0.95157     |
|  |                |                  |                |               |                 |               | SYNE1    |              | 0.89679     |
|  |                |                  |                |               |                 |               | TACR1    |              | 0.94621     |
|  |                |                  |                |               |                 |               | TM7SF3   |              | 0.87236     |
|  |                |                  |                |               |                 |               | WBP11    |              | 0.80764     |
|  |                |                  |                |               |                 |               | BAHCC1   |              | 0.95305     |
|  |                |                  |                |               |                 |               | FAM43A   |              | 0.81488     |
|  |                |                  |                |               |                 |               | PPP1R3E  |              | 0.96900     |
|  |                |                  |                |               |                 |               | SHANK3   |              | 0.93496     |
|  |                |                  |                |               |                 |               | PAPPA    |              | 0.91139     |
|  |                |                  |                |               |                 |               | TCF4     |              | 0.93564     |
|  |                |                  |                |               |                 |               | ABCA2    |              | 0.93629     |
|  |                |                  |                |               |                 |               | ABCA3    |              | 0.96759     |
|  |                |                  |                |               |                 |               | ABR      |              | 0.98060     |
|  |                |                  |                |               |                 |               | ARHGAP35 |              | 0.93287     |
|  |                |                  |                |               |                 |               | BTN3A1   |              | 0.98853     |
|  |                |                  |                |               |                 |               | DCUN1D3  |              | 0.93217     |
|  |                |                  |                |               |                 |               | FAT4     |              | 0.98166     |
|  |                |                  |                |               |                 |               | NCOR2    |              | 0.98308     |
|  |                |                  |                |               |                 |               | NEURL4   |              | 0.95827     |
|  |                |                  |                |               |                 |               | NLRCS    |              | 0.90651     |
|  |                |                  |                |               |                 |               | PIK3C2B  |              | 0.95891     |
|  |                |                  |                |               |                 |               | PLEC     |              | 0.99659     |
|  |                |                  |                |               |                 |               | PPM1J    |              | 0.87868     |
|  |                |                  |                |               |                 |               | RELL2    |              | 0.97167     |
|  |                |                  |                |               |                 |               | SBNO2    |              | 0.90208     |
|  |                |                  |                |               |                 |               | SCN4B    |              | 0.93022     |
|  |                |                  |                |               |                 |               | SCN8A    |              | 0.85005     |
|  |                |                  |                |               |                 |               | SERPINB8 |              | 0.94275     |
|  |                |                  |                |               |                 |               | SZT2     |              | 0.95204     |
|  |                |                  |                |               |                 |               | WNT7B    |              | 0.97525     |

|  | early_above_70 | early_aged_60_70 | early_below_55 | late_above_70 | late_aged_60_70 | late_below_55 | Probe ID | Description | Correlation |
|--|----------------|------------------|----------------|---------------|-----------------|---------------|----------|-------------|-------------|
|  |                |                  |                |               |                 |               | ARHGEF11 |             | 0.97395     |
|  |                |                  |                |               |                 |               | BMF      |             | 0.96769     |
|  |                |                  |                |               |                 |               | NUP210L  |             | 0.92284     |
|  |                |                  |                |               |                 |               | TRPS1    |             | 0.96822     |
|  |                |                  |                |               |                 |               | CRISPLD1 |             | 0.97814     |
|  |                |                  |                |               |                 |               | CYFIP2   |             | 0.98429     |
|  |                |                  |                |               |                 |               | FMNL2    |             | 0.92333     |
|  |                |                  |                |               |                 |               | HAL      |             | 0.82691     |
|  |                |                  |                |               |                 |               | SP110    |             | 0.95968     |
|  |                |                  |                |               |                 |               | STBD1    |             | 0.97487     |
|  |                |                  |                |               |                 |               | ZNF501   |             | 0.99612     |
|  |                |                  |                |               |                 |               | ZNF646   |             | 0.96575     |

|  | early_above_70 | early_aged_60_70 | early_below_55 | late_above_70 | late_aged_60_70 | late_below_55 | Probe ID   | Descripti... | Correlation |
|--|----------------|------------------|----------------|---------------|-----------------|---------------|------------|--------------|-------------|
|  |                |                  |                |               |                 |               | APT1       |              | 0.98694     |
|  |                |                  |                |               |                 |               | BRIX1      |              | 0.98821     |
|  |                |                  |                |               |                 |               | C12orf65   |              | 0.98684     |
|  |                |                  |                |               |                 |               | CASP2      |              | 0.95981     |
|  |                |                  |                |               |                 |               | CBX1       |              | 0.91274     |
|  |                |                  |                |               |                 |               | CBX3       |              | 0.98881     |
|  |                |                  |                |               |                 |               | CCT6A      |              | 0.98080     |
|  |                |                  |                |               |                 |               | CDKN2A     |              | 0.99347     |
|  |                |                  |                |               |                 |               | CDX1       |              | 0.80487     |
|  |                |                  |                |               |                 |               | CHPT1      |              | 0.88489     |
|  |                |                  |                |               |                 |               | COP55      |              | 0.94013     |
|  |                |                  |                |               |                 |               | DNAJC2     |              | 0.99266     |
|  |                |                  |                |               |                 |               | EIF3E      |              | 0.96813     |
|  |                |                  |                |               |                 |               | ENY2       |              | 0.92371     |
|  |                |                  |                |               |                 |               | GEMIN2     |              | 0.95811     |
|  |                |                  |                |               |                 |               | GMNN       |              | 0.95691     |
|  |                |                  |                |               |                 |               | GPR84      |              | 0.80772     |
|  |                |                  |                |               |                 |               | HNRNPA2... |              | 0.90753     |
|  |                |                  |                |               |                 |               | HNRNPC     |              | 0.96117     |
|  |                |                  |                |               |                 |               | HNRNPH3    |              | 0.96391     |
|  |                |                  |                |               |                 |               | HOXA1      |              | 0.99461     |
|  |                |                  |                |               |                 |               | HSPD1      |              | 0.96799     |
|  |                |                  |                |               |                 |               | LBR        |              | 0.97300     |
|  |                |                  |                |               |                 |               | LYAR       |              | 0.93398     |
|  |                |                  |                |               |                 |               | MNAT1      |              | 0.88396     |
|  |                |                  |                |               |                 |               | NDC80      |              | 0.96399     |
|  |                |                  |                |               |                 |               | NIPSNAP3A  |              | 0.90035     |
|  |                |                  |                |               |                 |               | NR2C1      |              | 0.92541     |
|  |                |                  |                |               |                 |               | NUP107     |              | 0.92315     |
|  |                |                  |                |               |                 |               | PFDN4      |              | 0.96314     |
|  |                |                  |                |               |                 |               | PFGDH      |              | 0.95630     |
|  |                |                  |                |               |                 |               | POLE3      |              | 0.98522     |
|  |                |                  |                |               |                 |               | PRKRIP1    |              | 0.99271     |
|  |                |                  |                |               |                 |               | PSMA7      |              | 0.95689     |
|  |                |                  |                |               |                 |               | RTN4R      |              | 0.93269     |
|  |                |                  |                |               |                 |               | SKP2       |              | 0.98434     |
|  |                |                  |                |               |                 |               | SLC44A1    |              | 0.93902     |
|  |                |                  |                |               |                 |               | SNRPF      |              | 0.98704     |
|  |                |                  |                |               |                 |               | SOX4       |              | 0.95667     |
|  |                |                  |                |               |                 |               | TATDN1     |              | 0.89361     |
|  |                |                  |                |               |                 |               | TTK        |              | 0.96138     |
|  |                |                  |                |               |                 |               | UPF3B      |              | 0.86686     |
|  |                |                  |                |               |                 |               | CDK2       |              | 0.97914     |
|  |                |                  |                |               |                 |               | PTGES3     |              | 0.97253     |
|  |                |                  |                |               |                 |               | ISC15      |              | 0.94524     |
|  |                |                  |                |               |                 |               | MFF        |              | 0.97048     |
|  |                |                  |                |               |                 |               | NAP1L1     |              | 0.97025     |
|  |                |                  |                |               |                 |               | PTMA       |              | 0.94588     |
|  |                |                  |                |               |                 |               | TUBB       |              | 0.94879     |
|  |                |                  |                |               |                 |               | EXOSC3     |              | 0.95105     |
|  |                |                  |                |               |                 |               | TMED6      |              | 0.92602     |
|  |                |                  |                |               |                 |               | ADAM20     |              | 0.80487     |
|  |                |                  |                |               |                 |               | ATPIA4     |              | 0.80487     |
|  |                |                  |                |               |                 |               | BIRC7      |              | 0.80487     |
|  |                |                  |                |               |                 |               | C11orf53   |              | 0.80487     |
|  |                |                  |                |               |                 |               | C9orf78    |              | 0.97235     |
|  |                |                  |                |               |                 |               | CCDC59     |              | 0.96311     |
|  |                |                  |                |               |                 |               | CDH8       |              | 0.80487     |
|  |                |                  |                |               |                 |               | CLNS1A     |              | 0.98127     |
|  |                |                  |                |               |                 |               | CNKSR3     |              | 0.91294     |
|  |                |                  |                |               |                 |               | DPER1      |              | 0.80487     |
|  |                |                  |                |               |                 |               | DYNLT1     |              | 0.96444     |
|  |                |                  |                |               |                 |               | FCRLA      |              | 0.80487     |
|  |                |                  |                |               |                 |               | FHAD1      |              | 0.96457     |
|  |                |                  |                |               |                 |               | GOLGA7     |              | 0.94261     |
|  |                |                  |                |               |                 |               | GSDMC      |              | 0.80487     |
|  |                |                  |                |               |                 |               | LGJ1       |              | 0.80487     |
|  |                |                  |                |               |                 |               | LUC7L3     |              | 0.96032     |
|  |                |                  |                |               |                 |               | MED10      |              | 0.98187     |
|  |                |                  |                |               |                 |               | PHACTR3    |              | 0.80487     |
|  |                |                  |                |               |                 |               | PIR        |              | 0.89718     |
|  |                |                  |                |               |                 |               | PSM87      |              | 0.97522     |
|  |                |                  |                |               |                 |               | PHY        |              | 0.80487     |
|  |                |                  |                |               |                 |               | RBMX       |              | 0.93432     |
|  |                |                  |                |               |                 |               | SEC61G     |              | 0.94051     |
|  |                |                  |                |               |                 |               | SEL1L2     |              | 0.80487     |
|  |                |                  |                |               |                 |               | SLC3A1     |              | 0.80487     |
|  |                |                  |                |               |                 |               | SNRPC      |              | 0.99519     |
|  |                |                  |                |               |                 |               | SYCP3      |              | 0.84661     |
|  |                |                  |                |               |                 |               | SYT16      |              | 0.80487     |
|  |                |                  |                |               |                 |               | TMC2       |              | 0.80487     |
|  |                |                  |                |               |                 |               | XPNPEP2    |              | 0.80487     |
|  |                |                  |                |               |                 |               | ZIC5       |              | 0.80487     |
|  |                |                  |                |               |                 |               | GATC       |              | 0.96061     |
|  |                |                  |                |               |                 |               | ZNF77      |              | 0.96819     |
|  |                |                  |                |               |                 |               | ARL28P     |              | 0.89214     |
|  |                |                  |                |               |                 |               | CDK2AP1    |              | 0.92306     |
|  |                |                  |                |               |                 |               | HYLS1      |              | 0.96899     |
|  |                |                  |                |               |                 |               | NDUFA4     |              | 0.83535     |
|  |                |                  |                |               |                 |               | RAB26      |              | 0.85099     |
|  |                |                  |                |               |                 |               | TAF4       |              | 0.98982     |
|  |                |                  |                |               |                 |               | TRA2A      |              | 0.85320     |
|  |                |                  |                |               |                 |               | TUBB3      |              | 0.99020     |
|  |                |                  |                |               |                 |               | XIRP1      |              | 0.80487     |
|  |                |                  |                |               |                 |               | GRM8       |              | 0.80487     |
|  |                |                  |                |               |                 |               | ARMC10     |              | 0.98697     |
|  |                |                  |                |               |                 |               | BAIAP2L2   |              | 0.94765     |
|  |                |                  |                |               |                 |               | C12orf73   |              | 0.96984     |
|  |                |                  |                |               |                 |               | C16orf91   |              | 0.84127     |
|  |                |                  |                |               |                 |               | CALML6     |              | 0.80487     |
|  |                |                  |                |               |                 |               | CHTOP      |              | 0.94091     |
|  |                |                  |                |               |                 |               | COX6A1     |              | 0.97470     |
|  |                |                  |                |               |                 |               | ELOVL6     |              | 0.93818     |
|  |                |                  |                |               |                 |               | ERH        |              | 0.84879     |
|  |                |                  |                |               |                 |               | FN3KRP     |              | 0.99575     |
|  |                |                  |                |               |                 |               | FNTA       |              | 0.99523     |
|  |                |                  |                |               |                 |               | GRIN1      |              | 0.94976     |
|  |                |                  |                |               |                 |               | HINFP      |              | 0.94650     |
|  |                |                  |                |               |                 |               | INTS8      |              | 0.92323     |
|  |                |                  |                |               |                 |               | MED30      |              | 0.88264     |
|  |                |                  |                |               |                 |               | NAA20      |              | 0.88826     |
|  |                |                  |                |               |                 |               | NDUFA12    |              | 0.85232     |
|  |                |                  |                |               |                 |               | NKIRAS2    |              | 0.89949     |
|  |                |                  |                |               |                 |               | NPHS1      |              | 0.80487     |
|  |                |                  |                |               |                 |               | ORCG       |              | 0.96017     |
|  |                |                  |                |               |                 |               | PCDHA1     |              | 0.80487     |
|  |                |                  |                |               |                 |               | PCDHA7     |              | 0.80487     |
|  |                |                  |                |               |                 |               | PFDN2      |              | 0.84412     |
|  |                |                  |                |               |                 |               | PSMA2      |              | 0.99354     |
|  |                |                  |                |               |                 |               | PSMC3IP    |              | 0.99254     |
|  |                |                  |                |               |                 |               | SARNP      |              | 0.93498     |
|  |                |                  |                |               |                 |               | TAF11      |              | 0.97987     |
|  |                |                  |                |               |                 |               | TAF1D      |              | 0.95303     |
|  |                |                  |                |               |                 |               | TAT        |              | 0.80487     |
|  |                |                  |                |               |                 |               | TCEA1      |              | 0.91945     |
|  |                |                  |                |               |                 |               | TNNI1      |              | 0.80487     |
|  |                |                  |                |               |                 |               | TNN        |              | 0.96129     |
|  |                |                  |                |               |                 |               | UBL5       |              | 0.88635     |
|  |                |                  |                |               |                 |               | ZNF823     |              | 0.95552     |

|  | early_above_70 | early_aged_60_70 | early_below_55 | late_above_70 | late_aged_60_70 | late_below_55 | Probe ID | Description | Correlation |
|--|----------------|------------------|----------------|---------------|-----------------|---------------|----------|-------------|-------------|
|  |                |                  |                |               |                 |               | MOCOS    |             | 0.85015     |
|  |                |                  |                |               |                 |               | SPECC1   |             | 0.89612     |
|  |                |                  |                |               |                 |               | SLC30A2  |             | 0.93701     |
|  |                |                  |                |               |                 |               | ACE2     |             | 0.93849     |
|  |                |                  |                |               |                 |               | CD226    |             | 0.90098     |
|  |                |                  |                |               |                 |               | FLT3     |             | 0.92824     |
|  |                |                  |                |               |                 |               | IL18RAP  |             | 0.93449     |
|  |                |                  |                |               |                 |               | KLHL4    |             | 0.92941     |
|  |                |                  |                |               |                 |               | RAB33A   |             | 0.89002     |
|  |                |                  |                |               |                 |               | PPIC     |             | 0.96736     |
|  |                |                  |                |               |                 |               | FAM102A  |             | 0.85257     |
|  |                |                  |                |               |                 |               | RAG1     |             | 0.87816     |
|  |                |                  |                |               |                 |               | TRIM47   |             | 0.84198     |

|  | early_above_70 | early_aged_60_70 | early_below_55 | late_above_70 | late_aged_60_70 | late_below_55 | Probe ID | Description | Correlation |
|--|----------------|------------------|----------------|---------------|-----------------|---------------|----------|-------------|-------------|
|  |                |                  |                |               |                 |               | AK7      |             | 0.94479     |
|  |                |                  |                |               |                 |               | CPNE8    |             | 0.98254     |
|  |                |                  |                |               |                 |               | FGF12    |             | 0.96494     |
|  |                |                  |                |               |                 |               | INTS6    |             | 0.97827     |
|  |                |                  |                |               |                 |               | MAPRE3   |             | 0.97270     |
|  |                |                  |                |               |                 |               | RBMS1    |             | 0.89529     |
|  |                |                  |                |               |                 |               | RNF144B  |             | 0.95884     |
|  |                |                  |                |               |                 |               | TFAP2A   |             | 0.82309     |
|  |                |                  |                |               |                 |               | TRIT1    |             | 0.93445     |
|  |                |                  |                |               |                 |               | ALOX5    |             | 0.94236     |
|  |                |                  |                |               |                 |               | APOOL    |             | 0.91890     |
|  |                |                  |                |               |                 |               | COTL1    |             | 0.90762     |
|  |                |                  |                |               |                 |               | CPM      |             | 0.98397     |
|  |                |                  |                |               |                 |               | CSMD2    |             | 0.95116     |
|  |                |                  |                |               |                 |               | GDF11    |             | 0.95312     |
|  |                |                  |                |               |                 |               | IPCEF1   |             | 0.99836     |
|  |                |                  |                |               |                 |               | ITM2B    |             | 0.91233     |
|  |                |                  |                |               |                 |               | KLHL5    |             | 0.97308     |
|  |                |                  |                |               |                 |               | MYH14    |             | 0.91876     |
|  |                |                  |                |               |                 |               | NOVA1    |             | 0.95437     |
|  |                |                  |                |               |                 |               | PCDHB14  |             | 0.98512     |
|  |                |                  |                |               |                 |               | PTGR1    |             | 0.96348     |
|  |                |                  |                |               |                 |               | RAB23    |             | 0.95855     |
|  |                |                  |                |               |                 |               | SCLY     |             | 0.82731     |
|  |                |                  |                |               |                 |               | SH3YL1   |             | 0.96367     |
|  |                |                  |                |               |                 |               | SORBS2   |             | 0.93045     |
|  |                |                  |                |               |                 |               | TTN      |             | 0.99503     |
|  |                |                  |                |               |                 |               | UGDH     |             | 0.96121     |
|  |                |                  |                |               |                 |               | PAPSS2   |             | 0.95568     |
|  |                |                  |                |               |                 |               | IFT140   |             | 0.93737     |
|  |                |                  |                |               |                 |               | DPY19L1  |             | 0.84782     |
|  |                |                  |                |               |                 |               | PRRT3    |             | 0.91309     |
|  |                |                  |                |               |                 |               | SAMD13   |             | 0.85158     |



|  | early_above_70 | early_aged_60_70 | early_below_55 | late_above_70 | late_aged_60_70 | late_below_55 | Probe ID | Description | Correlation |
|--|----------------|------------------|----------------|---------------|-----------------|---------------|----------|-------------|-------------|
|  |                |                  |                |               |                 |               | SMOC2    |             | 0.85537     |
|  |                |                  |                |               |                 |               | SMOX     |             | 0.97982     |
|  |                |                  |                |               |                 |               | FBXO16   |             | 0.82091     |
|  |                |                  |                |               |                 |               | ASPA     |             | 0.94513     |
|  |                |                  |                |               |                 |               | CAMK2A   |             | 0.87054     |
|  |                |                  |                |               |                 |               | CCDC122  |             | 0.90169     |
|  |                |                  |                |               |                 |               | CHRD1    |             | 0.91435     |
|  |                |                  |                |               |                 |               | EPHA5    |             | 0.98324     |
|  |                |                  |                |               |                 |               | KCNC1    |             | 0.85660     |
|  |                |                  |                |               |                 |               | KCNMB4   |             | 0.92394     |
|  |                |                  |                |               |                 |               | MYB      |             | 0.81242     |
|  |                |                  |                |               |                 |               | OVGP1    |             | 0.88391     |
|  |                |                  |                |               |                 |               | SI       |             | 0.94042     |
|  |                |                  |                |               |                 |               | STAC     |             | 0.76493     |
|  |                |                  |                |               |                 |               | TRIM9    |             | 0.85451     |
|  |                |                  |                |               |                 |               | WNK4     |             | 0.91884     |
|  |                |                  |                |               |                 |               | ZNF536   |             | 0.84920     |
|  |                |                  |                |               |                 |               | PPP1R1A  |             | 0.95306     |
|  |                |                  |                |               |                 |               | CA14     |             | 0.94864     |
|  |                |                  |                |               |                 |               | CD320    |             | 0.95512     |
|  |                |                  |                |               |                 |               | CIDEC    |             | 0.85313     |
|  |                |                  |                |               |                 |               | CSRP1    |             | 0.97003     |
|  |                |                  |                |               |                 |               | EIF4EBP1 |             | 0.96061     |
|  |                |                  |                |               |                 |               | EPHB3    |             | 0.94634     |
|  |                |                  |                |               |                 |               | IP6K3    |             | 0.99328     |
|  |                |                  |                |               |                 |               | MIP      |             | 0.87037     |
|  |                |                  |                |               |                 |               | RBFOX3   |             | 0.96729     |
|  |                |                  |                |               |                 |               | SLC37A4  |             | 0.96742     |

|  | early_above_70 | early_aged_60_70 | early_below_55 | late_above_70 | late_aged_60_70 | late_below_55 | Probe ID | Description | Correlation |
|--|----------------|------------------|----------------|---------------|-----------------|---------------|----------|-------------|-------------|
|  |                |                  |                |               |                 |               | DBH      |             | 0.80109     |
|  |                |                  |                |               |                 |               | LYPD6B   |             | 0.90155     |
|  |                |                  |                |               |                 |               | SCN2A    |             | 0.87479     |
|  |                |                  |                |               |                 |               | ST8SIA5  |             | 0.90340     |
|  |                |                  |                |               |                 |               | TPO      |             | 0.94889     |
|  |                |                  |                |               |                 |               | GSDMA    |             | 0.94359     |
|  |                |                  |                |               |                 |               | DLX2     |             | 0.97056     |
|  |                |                  |                |               |                 |               | ZNF749   |             | 0.70032     |

|  | early_above_70 | early_aged_60_70 | early_below_55 | late_above_70 | late_aged_60_70 | late_below_55 | Probe ID  | Descripti... | Correlation |
|--|----------------|------------------|----------------|---------------|-----------------|---------------|-----------|--------------|-------------|
|  |                |                  |                |               |                 |               | ABHD2     |              | 0.91184     |
|  |                |                  |                |               |                 |               | ACADM     |              | 0.95352     |
|  |                |                  |                |               |                 |               | ADAM10    |              | 0.98404     |
|  |                |                  |                |               |                 |               | AFF4      |              | 0.97185     |
|  |                |                  |                |               |                 |               | APLP2     |              | 0.97707     |
|  |                |                  |                |               |                 |               | ARFGEF2   |              | 0.99544     |
|  |                |                  |                |               |                 |               | BCL2L13   |              | 0.99484     |
|  |                |                  |                |               |                 |               | BIRC6     |              | 0.99752     |
|  |                |                  |                |               |                 |               | CALD1     |              | 0.96872     |
|  |                |                  |                |               |                 |               | CDC91     |              | 0.97477     |
|  |                |                  |                |               |                 |               | CLASP1    |              | 0.97024     |
|  |                |                  |                |               |                 |               | CLCN3     |              | 0.99153     |
|  |                |                  |                |               |                 |               | CLOCK     |              | 0.98780     |
|  |                |                  |                |               |                 |               | CNOT1     |              | 0.97492     |
|  |                |                  |                |               |                 |               | COPA      |              | 0.97874     |
|  |                |                  |                |               |                 |               | CPD       |              | 0.99368     |
|  |                |                  |                |               |                 |               | CPHB3     |              | 0.94919     |
|  |                |                  |                |               |                 |               | DBT       |              | 0.93796     |
|  |                |                  |                |               |                 |               | DCAF8     |              | 0.97225     |
|  |                |                  |                |               |                 |               | EIF2AK4   |              | 0.99457     |
|  |                |                  |                |               |                 |               | FAM177A1  |              | 0.95811     |
|  |                |                  |                |               |                 |               | FBLN5     |              | 0.97677     |
|  |                |                  |                |               |                 |               | FBXO36    |              | 0.97707     |
|  |                |                  |                |               |                 |               | FBXO42    |              | 0.98416     |
|  |                |                  |                |               |                 |               | FCHO2     |              | 0.97857     |
|  |                |                  |                |               |                 |               | GDE1      |              | 0.97199     |
|  |                |                  |                |               |                 |               | GOSR1     |              | 0.96125     |
|  |                |                  |                |               |                 |               | GPD2      |              | 0.95604     |
|  |                |                  |                |               |                 |               | HNRBOX1   |              | 0.97332     |
|  |                |                  |                |               |                 |               | IPO11     |              | 0.95161     |
|  |                |                  |                |               |                 |               | ITGA6     |              | 0.93124     |
|  |                |                  |                |               |                 |               | KCTD18    |              | 0.91183     |
|  |                |                  |                |               |                 |               | LARP1B    |              | 0.96352     |
|  |                |                  |                |               |                 |               | LATS1     |              | 0.97515     |
|  |                |                  |                |               |                 |               | LPH3      |              | 0.95415     |
|  |                |                  |                |               |                 |               | MAN2A1    |              | 0.99628     |
|  |                |                  |                |               |                 |               | MCMB9     |              | 0.95916     |
|  |                |                  |                |               |                 |               | MERTK     |              | 0.97865     |
|  |                |                  |                |               |                 |               | MFN2      |              | 0.98375     |
|  |                |                  |                |               |                 |               | MIA3      |              | 0.96762     |
|  |                |                  |                |               |                 |               | MIB1      |              | 0.96928     |
|  |                |                  |                |               |                 |               | MPP7      |              | 0.97128     |
|  |                |                  |                |               |                 |               | MSH3      |              | 0.98301     |
|  |                |                  |                |               |                 |               | MTMR6     |              | 0.99455     |
|  |                |                  |                |               |                 |               | MYCBP2    |              | 0.97991     |
|  |                |                  |                |               |                 |               | MYOF      |              | 0.81998     |
|  |                |                  |                |               |                 |               | NAA35     |              | 0.97389     |
|  |                |                  |                |               |                 |               | PCSK6     |              | 0.96342     |
|  |                |                  |                |               |                 |               | PRKFB4    |              | 0.98846     |
|  |                |                  |                |               |                 |               | PHLPP2    |              | 0.95093     |
|  |                |                  |                |               |                 |               | PIAS1     |              | 0.99868     |
|  |                |                  |                |               |                 |               | PRKAR2A   |              | 0.92620     |
|  |                |                  |                |               |                 |               | PRKCH     |              | 0.98528     |
|  |                |                  |                |               |                 |               | RBL2      |              | 0.99031     |
|  |                |                  |                |               |                 |               | RBM26     |              | 0.93361     |
|  |                |                  |                |               |                 |               | RDH12     |              | 0.94347     |
|  |                |                  |                |               |                 |               | RETSAT    |              | 0.96762     |
|  |                |                  |                |               |                 |               | REV3L     |              | 0.92388     |
|  |                |                  |                |               |                 |               | RREB1     |              | 0.97717     |
|  |                |                  |                |               |                 |               | SCAPER    |              | 0.99143     |
|  |                |                  |                |               |                 |               | SEC23IP   |              | 0.97619     |
|  |                |                  |                |               |                 |               | SEC24A    |              | 0.97398     |
|  |                |                  |                |               |                 |               | SERINC1   |              | 0.99698     |
|  |                |                  |                |               |                 |               | SETD7     |              | 0.96744     |
|  |                |                  |                |               |                 |               | SLC26A2   |              | 0.90688     |
|  |                |                  |                |               |                 |               | SLC2A1    |              | 0.99371     |
|  |                |                  |                |               |                 |               | SLC35A3   |              | 0.95578     |
|  |                |                  |                |               |                 |               | SPL2A     |              | 0.97709     |
|  |                |                  |                |               |                 |               | STAM      |              | 0.99276     |
|  |                |                  |                |               |                 |               | STXBP1    |              | 0.99546     |
|  |                |                  |                |               |                 |               | TCF12     |              | 0.97502     |
|  |                |                  |                |               |                 |               | TEX9      |              | 0.97024     |
|  |                |                  |                |               |                 |               | TMBIM6    |              | 0.96533     |
|  |                |                  |                |               |                 |               | TMEM33    |              | 0.98220     |
|  |                |                  |                |               |                 |               | TMX4      |              | 0.95543     |
|  |                |                  |                |               |                 |               | UBA5      |              | 0.96934     |
|  |                |                  |                |               |                 |               | UBE2Q2    |              | 0.96633     |
|  |                |                  |                |               |                 |               | UBF4      |              | 0.95734     |
|  |                |                  |                |               |                 |               | USP6NL    |              | 0.99520     |
|  |                |                  |                |               |                 |               | ZSCAN20   |              | 0.94564     |
|  |                |                  |                |               |                 |               | EXOC3     |              | 0.96349     |
|  |                |                  |                |               |                 |               | CNGC12    |              | 0.97072     |
|  |                |                  |                |               |                 |               | PBX1      |              | 0.93106     |
|  |                |                  |                |               |                 |               | STAT3     |              | 0.97784     |
|  |                |                  |                |               |                 |               | ACBD5     |              | 0.97204     |
|  |                |                  |                |               |                 |               | APF1      |              | 0.98559     |
|  |                |                  |                |               |                 |               | ANKRD11   |              | 0.95194     |
|  |                |                  |                |               |                 |               | CDS1      |              | 0.98357     |
|  |                |                  |                |               |                 |               | IQUB      |              | 0.94683     |
|  |                |                  |                |               |                 |               | KDMA4     |              | 0.99072     |
|  |                |                  |                |               |                 |               | PDXDC1    |              | 0.98318     |
|  |                |                  |                |               |                 |               | ACO2      |              | 0.99073     |
|  |                |                  |                |               |                 |               | ADAT1     |              | 0.98967     |
|  |                |                  |                |               |                 |               | ALG10     |              | 0.96271     |
|  |                |                  |                |               |                 |               | ARCN1     |              | 0.97914     |
|  |                |                  |                |               |                 |               | ATE1      |              | 0.97292     |
|  |                |                  |                |               |                 |               | ATF6      |              | 0.96899     |
|  |                |                  |                |               |                 |               | ATP11C    |              | 0.99632     |
|  |                |                  |                |               |                 |               | CPPED1    |              | 0.96625     |
|  |                |                  |                |               |                 |               | DENND4C   |              | 0.97348     |
|  |                |                  |                |               |                 |               | DIP2C     |              | 0.98015     |
|  |                |                  |                |               |                 |               | DNAIC6    |              | 0.96987     |
|  |                |                  |                |               |                 |               | EP315     |              | 0.99114     |
|  |                |                  |                |               |                 |               | EXT2      |              | 0.99112     |
|  |                |                  |                |               |                 |               | FBXL17    |              | 0.97849     |
|  |                |                  |                |               |                 |               | FBXL3     |              | 0.93835     |
|  |                |                  |                |               |                 |               | FIG4      |              | 0.97600     |
|  |                |                  |                |               |                 |               | FOXO1     |              | 0.96948     |
|  |                |                  |                |               |                 |               | GRI1      |              | 0.99379     |
|  |                |                  |                |               |                 |               | H2AC6     |              | 0.88444     |
|  |                |                  |                |               |                 |               | HIPK2     |              | 0.97385     |
|  |                |                  |                |               |                 |               | HSPA13    |              | 0.98963     |
|  |                |                  |                |               |                 |               | IDK       |              | 0.93986     |
|  |                |                  |                |               |                 |               | ILET5     |              | 0.97663     |
|  |                |                  |                |               |                 |               | IMPACT    |              | 0.98412     |
|  |                |                  |                |               |                 |               | IPO8      |              | 0.96985     |
|  |                |                  |                |               |                 |               | LAMP2     |              | 0.94775     |
|  |                |                  |                |               |                 |               | LNPEP     |              | 0.98474     |
|  |                |                  |                |               |                 |               | MAGT1     |              | 0.94527     |
|  |                |                  |                |               |                 |               | MAPK1     |              | 0.98848     |
|  |                |                  |                |               |                 |               | MPSD6     |              | 0.92256     |
|  |                |                  |                |               |                 |               | MPSD9     |              | 0.99374     |
|  |                |                  |                |               |                 |               | MID2      |              | 0.98702     |
|  |                |                  |                |               |                 |               | NFAT5     |              | 0.97513     |
|  |                |                  |                |               |                 |               | NIPAL2    |              | 0.93767     |
|  |                |                  |                |               |                 |               | OCRL      |              | 0.93578     |
|  |                |                  |                |               |                 |               | PAH4L     |              | 0.96417     |
|  |                |                  |                |               |                 |               | PHKA1     |              | 0.95048     |
|  |                |                  |                |               |                 |               | PHK8      |              | 0.91593     |
|  |                |                  |                |               |                 |               | PI3K      |              | 0.97800     |
|  |                |                  |                |               |                 |               | POLK      |              | 0.96844     |
|  |                |                  |                |               |                 |               | PREPL     |              | 0.95181     |
|  |                |                  |                |               |                 |               | PRKD3     |              | 0.97178     |
|  |                |                  |                |               |                 |               | RPGRP1L   |              | 0.97163     |
|  |                |                  |                |               |                 |               | SEC18BP2L |              | 0.96986     |
|  |                |                  |                |               |                 |               | STX12     |              | 0.97648     |
|  |                |                  |                |               |                 |               | TFPI2     |              | 0.98844     |
|  |                |                  |                |               |                 |               | TCF8RAP1  |              | 0.98968     |
|  |                |                  |                |               |                 |               | TIRAP     |              | 0.98156     |
|  |                |                  |                |               |                 |               | TMC03     |              | 0.95021     |
|  |                |                  |                |               |                 |               | TMED5     |              | 0.98110     |
|  |                |                  |                |               |                 |               | TOR1AIP1  |              | 0.97798     |
|  |                |                  |                |               |                 |               | UGGT2     |              | 0.93159     |
|  |                |                  |                |               |                 |               | URB1      |              | 0.96852     |
|  |                |                  |                |               |                 |               | XIAP      |              | 0.96624     |
|  |                |                  |                |               |                 |               | ZC3H13    |              | 0.93880     |
|  |                |                  |                |               |                 |               | ZC3H14    |              | 0.91192     |
|  |                |                  |                |               |                 |               | SLC25A46  |              | 0.92726     |
|  |                |                  |                |               |                 |               | LUTP1     |              | 0.96788     |
|  |                |                  |                |               |                 |               | TUBCP5    |              | 0.98167     |
|  |                |                  |                |               |                 |               | ZBTB38    |              | 0.98824     |
|  |                |                  |                |               |                 |               | PDE4B     |              | 0.90929     |
|  |                |                  |                |               |                 |               | AHCYL2    |              | 0.94250     |
|  |                |                  |                |               |                 |               | ALDH5A1   |              | 0.84565     |
|  |                |                  |                |               |                 |               | BSCL2     |              | 0.98338     |
|  |                |                  |                |               |                 |               | CCDC47    |              | 0.97533     |
|  |                |                  |                |               |                 |               | CHD9      |              | 0.99409     |
|  |                |                  |                |               |                 |               | CRADD     |              | 0.98326     |
|  |                |                  |                |               |                 |               | DOCK      |              | 0.97018     |
|  |                |                  |                |               |                 |               | EIF2AK3   |              | 0.99449     |
|  |                |                  |                |               |                 |               | ELMOD2    |              | 0.97669     |
|  |                |                  |                |               |                 |               | GLI1      |              | 0.98333     |
|  |                |                  |                |               |                 |               | COLGB1    |              | 0.93690     |
|  |                |                  |                |               |                 |               | CPHN      |              | 0.98143     |
|  |                |                  |                |               |                 |               | CRN       |              | 0.98850     |
|  |                |                  |                |               |                 |               | HARBI1    |              | 0.99819     |
|  |                |                  |                |               |                 |               | MGAT2     |              | 0.97757     |
|  |                |                  |                |               |                 |               | MOB18     |              | 0.95420     |
|  |                |                  |                |               |                 |               | MFZL1     |              | 0.99412     |
|  |                |                  |                |               |                 |               | NHLRC2    |              | 0.96688     |
|  |                |                  |                |               |                 |               | PICS      |              | 0.97542     |
|  |                |                  |                |               |                 |               | PIP4K2C   |              | 0.99712     |
|  |                |                  |                |               |                 |               | PIA2      |              | 0.97152     |
|  |                |                  |                |               |                 |               | PLBD2     |              | 0.92922     |
|  |                |                  |                |               |                 |               | PPARA     |              | 0.97580     |
|  |                |                  |                |               |                 |               | PTTN13    |              | 0.95920     |
|  |                |                  |                |               |                 |               | RALGAP8   |              | 0.99415     |
|  |                |                  |                |               |                 |               | SLC31A1   |              | 0.96614     |
|  |                |                  |                |               |                 |               | SLC35A1   |              | 0.99200     |
|  |                |                  |                |               |                 |               | SLC41A1   |              | 0.87609     |
|  |                |                  |                |               |                 |               | SPATA2    |              | 0.98051     |
|  |                |                  |                |               |                 |               | STXBP5    |              | 0.86677     |
|  |                |                  |                |               |                 |               | TM9SF4    |              | 0.93630     |
|  |                |                  |                |               |                 |               | TMEM170A  |              | 0.98638     |
|  |                |                  |                |               |                 |               | TRIM33    |              | 0.96428     |
|  |                |                  |                |               |                 |               | UBR1      |              | 0.97170     |

|  | early_above_70 | early_aged_60_70 | early_below_55 | late_above_70 | late_aged_60_70 | late_below_55 | Probe ID | Description | Correlation |
|--|----------------|------------------|----------------|---------------|-----------------|---------------|----------|-------------|-------------|
|  |                |                  |                |               |                 |               | CHD5     |             | 0.97283     |
|  |                |                  |                |               |                 |               | IFRD1    |             | 0.95583     |
|  |                |                  |                |               |                 |               | PRPF3    |             | 0.98543     |
|  |                |                  |                |               |                 |               | TSPAN12  |             | 0.94804     |
|  |                |                  |                |               |                 |               | ZNF337   |             | 0.96179     |
|  |                |                  |                |               |                 |               | C8orf44  |             | 0.98921     |
|  |                |                  |                |               |                 |               | PRRT2    |             | 0.97780     |
|  |                |                  |                |               |                 |               | CLK2     |             | 0.98519     |
|  |                |                  |                |               |                 |               | TIGD1    |             | 0.97805     |
|  |                |                  |                |               |                 |               | ATP6V1C2 |             | 0.97550     |
|  |                |                  |                |               |                 |               | C7orf31  |             | 0.97458     |
|  |                |                  |                |               |                 |               | EED      |             | 0.95727     |
|  |                |                  |                |               |                 |               | IFI44    |             | 0.92364     |
|  |                |                  |                |               |                 |               | CEP95    |             | 0.98749     |
|  |                |                  |                |               |                 |               | EPHB2    |             | 0.95393     |
|  |                |                  |                |               |                 |               | SAMD11   |             | 0.98262     |
|  |                |                  |                |               |                 |               | CCDC28B  |             | 0.96356     |
|  |                |                  |                |               |                 |               | DOC2A    |             | 0.96561     |
|  |                |                  |                |               |                 |               | FBXO41   |             | 0.95583     |
|  |                |                  |                |               |                 |               | GATAD1   |             | 0.98075     |
|  |                |                  |                |               |                 |               | LTB4R2   |             | 0.99080     |
|  |                |                  |                |               |                 |               | NR1I3    |             | 0.99116     |
|  |                |                  |                |               |                 |               | PCBP2    |             | 0.97138     |

|  | early_above_70 | early_aged_60_70 | early_below_55 | late_above_70 | late_aged_60_70 | late_below_55 | Probe ID | Description | Correlation |
|--|----------------|------------------|----------------|---------------|-----------------|---------------|----------|-------------|-------------|
|  |                |                  |                |               |                 |               | CYB5R4   |             | 0.88416     |
|  |                |                  |                |               |                 |               | FASTKD2  |             | 0.96884     |
|  |                |                  |                |               |                 |               | GSG1     |             | 0.93033     |
|  |                |                  |                |               |                 |               | HOMER1   |             | 0.92349     |
|  |                |                  |                |               |                 |               | MEGF9    |             | 0.91196     |
|  |                |                  |                |               |                 |               | MXD1     |             | 0.95084     |
|  |                |                  |                |               |                 |               | SCYL2    |             | 0.82840     |
|  |                |                  |                |               |                 |               | DSG1     |             | 0.93916     |
|  |                |                  |                |               |                 |               | EDN1     |             | 0.79099     |
|  |                |                  |                |               |                 |               | FSD1L    |             | 0.91886     |
|  |                |                  |                |               |                 |               | GALNT6   |             | 0.62815     |
|  |                |                  |                |               |                 |               | P2RY10   |             | 0.94743     |
|  |                |                  |                |               |                 |               | RALGPS2  |             | 0.98214     |
|  |                |                  |                |               |                 |               | RASAL2   |             | 0.93128     |
|  |                |                  |                |               |                 |               | TRPV5    |             | 0.93769     |
|  |                |                  |                |               |                 |               | UBE2D1   |             | 0.82282     |
|  |                |                  |                |               |                 |               | ANKS1B   |             | 0.85056     |
|  |                |                  |                |               |                 |               | ADAMTS1  |             | 0.86796     |
|  |                |                  |                |               |                 |               | SIGLEC6  |             | 0.95938     |
|  |                |                  |                |               |                 |               | B3GNT2   |             | 0.89396     |
|  |                |                  |                |               |                 |               | ADORA2B  |             | 0.83286     |
|  |                |                  |                |               |                 |               | CLDN7    |             | 0.95580     |
|  |                |                  |                |               |                 |               | FGFRL1   |             | 0.93630     |
|  |                |                  |                |               |                 |               | GLTPD2   |             | 0.92338     |
|  |                |                  |                |               |                 |               | KDM1B    |             | 0.97880     |
|  |                |                  |                |               |                 |               | KPNA7    |             | 0.90913     |
|  |                |                  |                |               |                 |               | LGR4     |             | 0.89972     |
|  |                |                  |                |               |                 |               | NIPAL1   |             | 0.95929     |
|  |                |                  |                |               |                 |               | SLC25A25 |             | 0.86447     |
|  |                |                  |                |               |                 |               | ZNF484   |             | 0.94212     |

|  | early_above_70 | early_aged_60_70 | early_below_55 | late_above_70 | late_aged_60_70 | late_below_55 | Probe ID | Description | Correlation |
|--|----------------|------------------|----------------|---------------|-----------------|---------------|----------|-------------|-------------|
|  |                |                  |                |               |                 |               | APPBP2   |             | 0.96849     |
|  |                |                  |                |               |                 |               | BCKDHB   |             | 0.98809     |
|  |                |                  |                |               |                 |               | COBLL1   |             | 0.95038     |
|  |                |                  |                |               |                 |               | DOCK3    |             | 0.78180     |
|  |                |                  |                |               |                 |               | ELL2     |             | 0.96444     |
|  |                |                  |                |               |                 |               | EPCAM    |             | 0.77638     |
|  |                |                  |                |               |                 |               | FEM1C    |             | 0.98066     |
|  |                |                  |                |               |                 |               | L3MBTL4  |             | 0.78078     |
|  |                |                  |                |               |                 |               | MINPP1   |             | 0.87889     |
|  |                |                  |                |               |                 |               | NNT      |             | 0.87666     |
|  |                |                  |                |               |                 |               | PIK3AP1  |             | 0.95942     |
|  |                |                  |                |               |                 |               | PIP5K1B  |             | 0.95110     |
|  |                |                  |                |               |                 |               | PKP2     |             | 0.84658     |
|  |                |                  |                |               |                 |               | SCAMP1   |             | 0.97314     |
|  |                |                  |                |               |                 |               | SETD9    |             | 0.94261     |
|  |                |                  |                |               |                 |               | SLC39A6  |             | 0.98951     |
|  |                |                  |                |               |                 |               | VPS37A   |             | 0.96508     |
|  |                |                  |                |               |                 |               | ADARB2   |             | 0.83523     |
|  |                |                  |                |               |                 |               | C18orf32 |             | 0.82649     |
|  |                |                  |                |               |                 |               | CDKL5    |             | 0.96550     |
|  |                |                  |                |               |                 |               | HEATR3   |             | 0.94309     |
|  |                |                  |                |               |                 |               | MBOAT2   |             | 0.92920     |
|  |                |                  |                |               |                 |               | TJP2     |             | 0.89289     |
|  |                |                  |                |               |                 |               | USP14    |             | 0.89338     |
|  |                |                  |                |               |                 |               | C11orf71 |             | 0.97802     |
|  |                |                  |                |               |                 |               | TTC37    |             | 0.94715     |
|  |                |                  |                |               |                 |               | NAPG     |             | 0.98912     |
|  |                |                  |                |               |                 |               | RHOBTB3  |             | 0.73595     |
|  |                |                  |                |               |                 |               | SGTB     |             | 0.90970     |
|  |                |                  |                |               |                 |               | SLC26A5  |             | 0.94753     |
|  |                |                  |                |               |                 |               | SPATA13  |             | 0.81900     |
|  |                |                  |                |               |                 |               | TNKS     |             | 0.92444     |
|  |                |                  |                |               |                 |               | ZBED3    |             | 0.95601     |

|  | early_above_70 | early_aged_60_70 | early_below_55 | late_above_70 | late_aged_60_70 | late_below_55 | Probe ID | Descripti... | Correlation |
|--|----------------|------------------|----------------|---------------|-----------------|---------------|----------|--------------|-------------|
|  |                |                  |                |               |                 |               | ABCC8    |              | 0.97296     |
|  |                |                  |                |               |                 |               | ACTA2    |              | 0.90876     |
|  |                |                  |                |               |                 |               | ADAMTS17 |              | 0.89534     |
|  |                |                  |                |               |                 |               | ARHGEF19 |              | 0.91244     |
|  |                |                  |                |               |                 |               | CACNA1C  |              | 0.87995     |
|  |                |                  |                |               |                 |               | DHRS12   |              | 0.93216     |
|  |                |                  |                |               |                 |               | FGFR3    |              | 0.97890     |
|  |                |                  |                |               |                 |               | HHAT     |              | 0.97556     |
|  |                |                  |                |               |                 |               | KCTD1    |              | 0.93499     |
|  |                |                  |                |               |                 |               | LDB3     |              | 0.97057     |
|  |                |                  |                |               |                 |               | MEIS2    |              | 0.97252     |
|  |                |                  |                |               |                 |               | MYLK     |              | 0.94698     |
|  |                |                  |                |               |                 |               | MYOM1    |              | 0.97821     |
|  |                |                  |                |               |                 |               | POLN     |              | 0.92581     |
|  |                |                  |                |               |                 |               | RAPGEF3  |              | 0.98420     |
|  |                |                  |                |               |                 |               | RBM24    |              | 0.95722     |
|  |                |                  |                |               |                 |               | SGK1     |              | 0.81690     |
|  |                |                  |                |               |                 |               | SPRY2    |              | 0.86636     |
|  |                |                  |                |               |                 |               | TPM1     |              | 0.87456     |
|  |                |                  |                |               |                 |               | ZNF516   |              | 0.99088     |
|  |                |                  |                |               |                 |               | PIPOX    |              | 0.94742     |
|  |                |                  |                |               |                 |               | HERPUD1  |              | 0.98393     |
|  |                |                  |                |               |                 |               | AKAP7    |              | 0.95766     |
|  |                |                  |                |               |                 |               | ALDH1A2  |              | 0.96779     |
|  |                |                  |                |               |                 |               | COL23A1  |              | 0.95676     |
|  |                |                  |                |               |                 |               | CRISPLD2 |              | 0.97533     |
|  |                |                  |                |               |                 |               | FERMT1   |              | 0.94765     |
|  |                |                  |                |               |                 |               | HYDIN    |              | 0.88654     |
|  |                |                  |                |               |                 |               | KANK4    |              | 0.99353     |
|  |                |                  |                |               |                 |               | KCNIP3   |              | 0.90596     |
|  |                |                  |                |               |                 |               | NTRK3    |              | 0.95770     |
|  |                |                  |                |               |                 |               | OSBPL7   |              | 0.98078     |
|  |                |                  |                |               |                 |               | PRDM8    |              | 0.94907     |
|  |                |                  |                |               |                 |               | PTN      |              | 0.87426     |
|  |                |                  |                |               |                 |               | PYGM     |              | 0.94027     |
|  |                |                  |                |               |                 |               | TGFB3    |              | 0.94474     |
|  |                |                  |                |               |                 |               | ADCY5    |              | 0.97200     |
|  |                |                  |                |               |                 |               | ANXA11   |              | 0.96953     |
|  |                |                  |                |               |                 |               | APOF     |              | 0.93834     |
|  |                |                  |                |               |                 |               | CPAMD8   |              | 0.98113     |
|  |                |                  |                |               |                 |               | FAM3D    |              | 0.92191     |
|  |                |                  |                |               |                 |               | HIF3A    |              | 0.94724     |
|  |                |                  |                |               |                 |               | JPH4     |              | 0.89565     |
|  |                |                  |                |               |                 |               | RASL12   |              | 0.93730     |
|  |                |                  |                |               |                 |               | SLC2A4   |              | 0.94852     |
|  |                |                  |                |               |                 |               | SYNM     |              | 0.94110     |
|  |                |                  |                |               |                 |               | VPS36    |              | 0.94994     |

|  | early_above_70 | early_aged_60_70 | early_below_55 | late_above_70 | late_aged_60_70 | late_below_55 | Probe ID | Description | Correlation |
|--|----------------|------------------|----------------|---------------|-----------------|---------------|----------|-------------|-------------|
|  |                |                  |                |               |                 |               | FBXO24   |             | 0.85453     |
|  |                |                  |                |               |                 |               | NAPSA    |             | 0.94336     |
|  |                |                  |                |               |                 |               | ZCWPW1   |             | 0.86146     |
|  |                |                  |                |               |                 |               | AGT      |             | 0.87493     |
|  |                |                  |                |               |                 |               | CPB1     |             | 0.90562     |
|  |                |                  |                |               |                 |               | GCK      |             | 0.70473     |
|  |                |                  |                |               |                 |               | MLC1     |             | 0.89019     |
|  |                |                  |                |               |                 |               | SLC44A3  |             | 0.78411     |
|  |                |                  |                |               |                 |               | TFCP2L1  |             | 0.96972     |
|  |                |                  |                |               |                 |               | TRIM29   |             | 0.96284     |
|  |                |                  |                |               |                 |               | KRT19    |             | 0.94911     |
|  |                |                  |                |               |                 |               | SYMPK    |             | 0.81191     |
|  |                |                  |                |               |                 |               | FOXQ1    |             | 0.76508     |
|  |                |                  |                |               |                 |               | GNA15    |             | 0.97285     |
|  |                |                  |                |               |                 |               | LAMB3    |             | 0.95125     |
|  |                |                  |                |               |                 |               | WDR18    |             | 0.73258     |

|  | early_above_70 | early_aged_60_70 | early_below_55 | late_above_70 | late_aged_60_70 | late_below_55 | Probe ID | Description | Correlation |
|--|----------------|------------------|----------------|---------------|-----------------|---------------|----------|-------------|-------------|
|  |                |                  |                |               |                 |               | ABCG2    |             | 0.99111     |
|  |                |                  |                |               |                 |               | DYM      |             | 0.98571     |
|  |                |                  |                |               |                 |               | FAM114A2 |             | 0.99439     |
|  |                |                  |                |               |                 |               | LIG3     |             | 0.89491     |
|  |                |                  |                |               |                 |               | MTMR3    |             | 0.99197     |
|  |                |                  |                |               |                 |               | PAIP2B   |             | 0.92116     |
|  |                |                  |                |               |                 |               | SPATS2   |             | 0.92682     |
|  |                |                  |                |               |                 |               | STIM2    |             | 0.97819     |
|  |                |                  |                |               |                 |               | UBE4B    |             | 0.99004     |
|  |                |                  |                |               |                 |               | ZCCHC2   |             | 0.96422     |
|  |                |                  |                |               |                 |               | SP5      |             | 0.95898     |
|  |                |                  |                |               |                 |               | NBPF1    |             | 0.98694     |
|  |                |                  |                |               |                 |               | ACACB    |             | 0.87949     |
|  |                |                  |                |               |                 |               | AKT3     |             | 0.89771     |
|  |                |                  |                |               |                 |               | CBFA2T2  |             | 0.90985     |
|  |                |                  |                |               |                 |               | CHD1L    |             | 0.98426     |
|  |                |                  |                |               |                 |               | CHD6     |             | 0.99294     |
|  |                |                  |                |               |                 |               | HTR7     |             | 0.86510     |
|  |                |                  |                |               |                 |               | LRP8     |             | 0.97820     |
|  |                |                  |                |               |                 |               | LSM11    |             | 0.97042     |
|  |                |                  |                |               |                 |               | ZNF37A   |             | 0.95988     |
|  |                |                  |                |               |                 |               | ZBTB40   |             | 0.89084     |
|  |                |                  |                |               |                 |               | CPT2     |             | 0.95305     |
|  |                |                  |                |               |                 |               | DCLRE1A  |             | 0.87310     |
|  |                |                  |                |               |                 |               | KLHL11   |             | 0.98771     |
|  |                |                  |                |               |                 |               | MYO5B    |             | 0.98042     |
|  |                |                  |                |               |                 |               | TMC7     |             | 0.96151     |
|  |                |                  |                |               |                 |               | ZNF557   |             | 0.97120     |

|  | early_above_70 | early_aged_60_70 | early_below_55 | late_above_70 | late_aged_60_70 | late_below_55 | Probe ID | Description | Correlation |
|--|----------------|------------------|----------------|---------------|-----------------|---------------|----------|-------------|-------------|
|  |                |                  |                |               |                 |               | ARRDC2   |             | 0.93095     |
|  |                |                  |                |               |                 |               | CACNA2D4 |             | 0.95234     |
|  |                |                  |                |               |                 |               | CBLN3    |             | 0.94768     |
|  |                |                  |                |               |                 |               | DLG4     |             | 0.91326     |
|  |                |                  |                |               |                 |               | FAS      |             | 0.96898     |
|  |                |                  |                |               |                 |               | NTN4     |             | 0.98239     |
|  |                |                  |                |               |                 |               | SAMD4A   |             | 0.98236     |
|  |                |                  |                |               |                 |               | TBX6     |             | 0.92348     |
|  |                |                  |                |               |                 |               | TMEM138  |             | 0.95843     |
|  |                |                  |                |               |                 |               | ABLM2    |             | 0.95125     |
|  |                |                  |                |               |                 |               | C1QTNF3  |             | 0.93712     |
|  |                |                  |                |               |                 |               | EFEMP1   |             | 0.93600     |
|  |                |                  |                |               |                 |               | EPHX1    |             | 0.96057     |
|  |                |                  |                |               |                 |               | FBLN7    |             | 0.89584     |
|  |                |                  |                |               |                 |               | FRAS1    |             | 0.95888     |
|  |                |                  |                |               |                 |               | GHRL     |             | 0.92963     |
|  |                |                  |                |               |                 |               | GJA1     |             | 0.98003     |
|  |                |                  |                |               |                 |               | HDAC9    |             | 0.98394     |
|  |                |                  |                |               |                 |               | KCNC4    |             | 0.99505     |
|  |                |                  |                |               |                 |               | MATN2    |             | 0.94615     |
|  |                |                  |                |               |                 |               | OBSCN    |             | 0.97156     |
|  |                |                  |                |               |                 |               | PAMR1    |             | 0.95851     |
|  |                |                  |                |               |                 |               | PELI2    |             | 0.90048     |
|  |                |                  |                |               |                 |               | SAMD15   |             | 0.96269     |
|  |                |                  |                |               |                 |               | SLC5A1   |             | 0.87801     |
|  |                |                  |                |               |                 |               | SMC1B    |             | 0.94006     |
|  |                |                  |                |               |                 |               | SPAG16   |             | 0.95082     |
|  |                |                  |                |               |                 |               | TFPI     |             | 0.96974     |
|  |                |                  |                |               |                 |               | TIMP3    |             | 0.82583     |
|  |                |                  |                |               |                 |               | S100P    |             | 0.92107     |
|  |                |                  |                |               |                 |               | DERL3    |             | 0.96498     |
|  |                |                  |                |               |                 |               | ABCC11   |             | 0.93459     |
|  |                |                  |                |               |                 |               | AIFM3    |             | 0.83440     |
|  |                |                  |                |               |                 |               | GLTP     |             | 0.77756     |
|  |                |                  |                |               |                 |               | IRF6     |             | 0.89446     |
|  |                |                  |                |               |                 |               | SMAD3    |             | 0.97254     |
|  |                |                  |                |               |                 |               | TSPAN5   |             | 0.98947     |

|  | early_above_70 | early_aged_60_70 | early_below_55 | late_above_70 | late_aged_60_70 | late_below_55 | Probe ID | Description | Correlation |
|--|----------------|------------------|----------------|---------------|-----------------|---------------|----------|-------------|-------------|
|  |                |                  |                |               |                 |               | ALDH3B1  |             | 0.92815     |
|  |                |                  |                |               |                 |               | AP1S1    |             | 0.88673     |
|  |                |                  |                |               |                 |               | DGKB     |             | 0.91443     |
|  |                |                  |                |               |                 |               | E2F5     |             | 0.83513     |
|  |                |                  |                |               |                 |               | ETV7     |             | 0.94412     |
|  |                |                  |                |               |                 |               | GADD45A  |             | 0.78526     |
|  |                |                  |                |               |                 |               | NHSL1    |             | 0.96174     |
|  |                |                  |                |               |                 |               | PIM2     |             | 0.94631     |
|  |                |                  |                |               |                 |               | PLK2     |             | 0.94896     |
|  |                |                  |                |               |                 |               | POLR1E   |             | 0.95021     |
|  |                |                  |                |               |                 |               | SLC7A11  |             | 0.89729     |
|  |                |                  |                |               |                 |               | SRPK1    |             | 0.93044     |
|  |                |                  |                |               |                 |               | AUTS2    |             | 0.95449     |
|  |                |                  |                |               |                 |               | HMGA1    |             | 0.97726     |
|  |                |                  |                |               |                 |               | A1CF     |             | 0.85957     |
|  |                |                  |                |               |                 |               | ARHGEF26 |             | 0.92908     |
|  |                |                  |                |               |                 |               | BCL2A1   |             | 0.87629     |
|  |                |                  |                |               |                 |               | CDHR5    |             | 0.89108     |
|  |                |                  |                |               |                 |               | FSD1     |             | 0.89003     |
|  |                |                  |                |               |                 |               | LGALS12  |             | 0.90797     |
|  |                |                  |                |               |                 |               | MPP6     |             | 0.98387     |
|  |                |                  |                |               |                 |               | VEGFC    |             | 0.96873     |
|  |                |                  |                |               |                 |               | LLGL1    |             | 0.94732     |
|  |                |                  |                |               |                 |               | SCRT1    |             | 0.91477     |
|  |                |                  |                |               |                 |               | ADAP2    |             | 0.85234     |
|  |                |                  |                |               |                 |               | C2orf50  |             | 0.91459     |
|  |                |                  |                |               |                 |               | CA13     |             | 0.85913     |
|  |                |                  |                |               |                 |               | FOXN4    |             | 0.88560     |
|  |                |                  |                |               |                 |               | FPGS     |             | 0.89537     |
|  |                |                  |                |               |                 |               | MOK      |             | 0.94879     |
|  |                |                  |                |               |                 |               | MRPL37   |             | 0.95551     |
|  |                |                  |                |               |                 |               | PNMT     |             | 0.90919     |
|  |                |                  |                |               |                 |               | RAG2     |             | 0.90866     |
|  |                |                  |                |               |                 |               | SDR16C5  |             | 0.88571     |

|  | early_above_70 | early_aged_60_70 | early_below_55 | late_above_70 | late_aged_60_70 | late_below_55 | Probe ID | Description | Correlation |
|--|----------------|------------------|----------------|---------------|-----------------|---------------|----------|-------------|-------------|
|  |                |                  |                |               |                 |               | CLK4     |             | 0.93571     |
|  |                |                  |                |               |                 |               | SLC9A3   |             | 0.95733     |
|  |                |                  |                |               |                 |               | SPAG17   |             | 0.88369     |
|  |                |                  |                |               |                 |               | CPNE1    |             | 0.94275     |
|  |                |                  |                |               |                 |               | CRISP3   |             | 0.84322     |
|  |                |                  |                |               |                 |               | LRRC31   |             | 0.78099     |
|  |                |                  |                |               |                 |               | NMNAT2   |             | 0.82099     |
|  |                |                  |                |               |                 |               | SLC25A27 |             | 0.91568     |
|  |                |                  |                |               |                 |               | THUMPD2  |             | 0.92989     |
|  |                |                  |                |               |                 |               | TIA1     |             | 0.94871     |
|  |                |                  |                |               |                 |               | IFI6     |             | 0.91098     |



|  | early_above_70 | early_aged_60_70 | early_below_55 | late_above_70 | late_aged_60_70 | late_below_55 | Probe ID | Description | Correlation |
|--|----------------|------------------|----------------|---------------|-----------------|---------------|----------|-------------|-------------|
|  |                |                  |                |               |                 |               | APC2     |             | 0.96801     |
|  |                |                  |                |               |                 |               | CD36     |             | 0.87423     |
|  |                |                  |                |               |                 |               | CDKN1A   |             | 0.87486     |
|  |                |                  |                |               |                 |               | DENND2A  |             | 0.95879     |
|  |                |                  |                |               |                 |               | EPHA2    |             | 0.70193     |
|  |                |                  |                |               |                 |               | MAST2    |             | 0.96526     |
|  |                |                  |                |               |                 |               | NT5DC3   |             | 0.84283     |
|  |                |                  |                |               |                 |               | PKD2L1   |             | 0.91911     |
|  |                |                  |                |               |                 |               | SLC27A5  |             | 0.80219     |
|  |                |                  |                |               |                 |               | SYTL2    |             | 0.88584     |
|  |                |                  |                |               |                 |               | TMBIM1   |             | 0.86423     |
|  |                |                  |                |               |                 |               | WNT10A   |             | 0.79656     |
|  |                |                  |                |               |                 |               | SYN3     |             | 0.82723     |
|  |                |                  |                |               |                 |               | ABCC2    |             | 0.76254     |
|  |                |                  |                |               |                 |               | CHI3L1   |             | 0.98022     |
|  |                |                  |                |               |                 |               | EGR2     |             | 0.94049     |
|  |                |                  |                |               |                 |               | LMO3     |             | 0.92746     |
|  |                |                  |                |               |                 |               | STAT5A   |             | 0.98436     |
|  |                |                  |                |               |                 |               | PPFIBP2  |             | 0.92918     |
|  |                |                  |                |               |                 |               | ASB1     |             | 0.94909     |
|  |                |                  |                |               |                 |               | BCL2L15  |             | 0.66282     |
|  |                |                  |                |               |                 |               | CTSB     |             | 0.96343     |
|  |                |                  |                |               |                 |               | FAM83E   |             | 0.89331     |
|  |                |                  |                |               |                 |               | MFSD12   |             | 0.94995     |
|  |                |                  |                |               |                 |               | ROBO3    |             | 0.74743     |

|  | early_above_70 | early_aged_60_70 | early_below_55 | late_above_70 | late_aged_60_70 | late_below_55 | Probe ID | Description | Correlation |
|--|----------------|------------------|----------------|---------------|-----------------|---------------|----------|-------------|-------------|
|  |                |                  |                |               |                 |               | ATXN7L1  |             | 0.88173     |
|  |                |                  |                |               |                 |               | GRAMD4   |             | 0.96401     |
|  |                |                  |                |               |                 |               | GRK4     |             | 0.93701     |
|  |                |                  |                |               |                 |               | NPAS3    |             | 0.98116     |
|  |                |                  |                |               |                 |               | QSOX1    |             | 0.94086     |
|  |                |                  |                |               |                 |               | SLC1A3   |             | 0.96038     |
|  |                |                  |                |               |                 |               | ZNF862   |             | 0.84713     |
|  |                |                  |                |               |                 |               | SNAI1    |             | 0.88471     |
|  |                |                  |                |               |                 |               | AMPH     |             | 0.80829     |
|  |                |                  |                |               |                 |               | COL12A1  |             | 0.81709     |
|  |                |                  |                |               |                 |               | CPNE5    |             | 0.80500     |
|  |                |                  |                |               |                 |               | FAM20A   |             | 0.92860     |
|  |                |                  |                |               |                 |               | GLYATL2  |             | 0.81151     |
|  |                |                  |                |               |                 |               | SLC14A2  |             | 0.84817     |
|  |                |                  |                |               |                 |               | SLC40A1  |             | 0.87094     |
|  |                |                  |                |               |                 |               | TRAF1    |             | 0.82307     |
|  |                |                  |                |               |                 |               | MAST3    |             | 0.91627     |
|  |                |                  |                |               |                 |               | MTHFR    |             | 0.84084     |
|  |                |                  |                |               |                 |               | SLC43A2  |             | 0.90864     |
|  |                |                  |                |               |                 |               | TPCN1    |             | 0.96391     |

|  | early_above_70 | early_aged_60_70 | early_below_55 | late_above_70 | late_aged_60_70 | late_below_55 | Probe ID | Description | Correlation |
|-----------------------------------------------------------------------------------|----------------|------------------|----------------|---------------|-----------------|---------------|----------|-------------|-------------|
|                                                                                   |                |                  |                |               |                 |               | NUDCD1   |             | 0.88019     |
|                                                                                   |                |                  |                |               |                 |               | POLR3G   |             | 0.86661     |
|                                                                                   |                |                  |                |               |                 |               | UTP23    |             | 0.91912     |
|                                                                                   |                |                  |                |               |                 |               | WSB1     |             | 0.89093     |
|                                                                                   |                |                  |                |               |                 |               | C8orf37  |             | 0.91871     |
|                                                                                   |                |                  |                |               |                 |               | CENPO    |             | 0.94715     |
|                                                                                   |                |                  |                |               |                 |               | CREBZF   |             | 0.97900     |
|                                                                                   |                |                  |                |               |                 |               | EPSTI1   |             | 0.88338     |
|                                                                                   |                |                  |                |               |                 |               | KHDRBS3  |             | 0.91682     |
|                                                                                   |                |                  |                |               |                 |               | SLC24A4  |             | 0.72270     |
|                                                                                   |                |                  |                |               |                 |               | STK3     |             | 0.96250     |
|                                                                                   |                |                  |                |               |                 |               | PPM1M    |             | 0.84038     |
|                                                                                   |                |                  |                |               |                 |               | SPIN4    |             | 0.90809     |
|                                                                                   |                |                  |                |               |                 |               | ACTL6A   |             | 0.98528     |
|                                                                                   |                |                  |                |               |                 |               | RTTN     |             | 0.95324     |
|                                                                                   |                |                  |                |               |                 |               | SERPINI1 |             | 0.95583     |
|                                                                                   |                |                  |                |               |                 |               | SH2D5    |             | 0.76668     |
|                                                                                   |                |                  |                |               |                 |               | TRAF5    |             | 0.89788     |

|  | early_above_70 | early_aged_60_70 | early_below_55 | late_above_70 | late_aged_60_70 | late_below_55 | Probe ID | Descripti... | Correlation |
|--|----------------|------------------|----------------|---------------|-----------------|---------------|----------|--------------|-------------|
|  |                |                  |                |               |                 |               | AKAP1    |              | 0.91300     |
|  |                |                  |                |               |                 |               | AP3B1    |              | 0.99578     |
|  |                |                  |                |               |                 |               | ARHGAP18 |              | 0.98818     |
|  |                |                  |                |               |                 |               | ARSB     |              | 0.99526     |
|  |                |                  |                |               |                 |               | ATXN1    |              | 0.94479     |
|  |                |                  |                |               |                 |               | CCN      |              | 0.97111     |
|  |                |                  |                |               |                 |               | DHX29    |              | 0.97617     |
|  |                |                  |                |               |                 |               | DUS3     |              | 0.97071     |
|  |                |                  |                |               |                 |               | DIXDC1   |              | 0.84563     |
|  |                |                  |                |               |                 |               | DSC2     |              | 0.87042     |
|  |                |                  |                |               |                 |               | DYSF     |              | 0.97448     |
|  |                |                  |                |               |                 |               | EHF      |              | 0.95382     |
|  |                |                  |                |               |                 |               | ERC1     |              | 0.95811     |
|  |                |                  |                |               |                 |               | ERLEC1   |              | 0.95980     |
|  |                |                  |                |               |                 |               | ERLIN2   |              | 0.89344     |
|  |                |                  |                |               |                 |               | EXOC6    |              | 0.99591     |
|  |                |                  |                |               |                 |               | FAM184A  |              | 0.97495     |
|  |                |                  |                |               |                 |               | FBLN4    |              | 0.98413     |
|  |                |                  |                |               |                 |               | FCD4     |              | 0.96274     |
|  |                |                  |                |               |                 |               | FNDCC38  |              | 0.90164     |
|  |                |                  |                |               |                 |               | FTO      |              | 0.99465     |
|  |                |                  |                |               |                 |               | G3BP2    |              | 0.98768     |
|  |                |                  |                |               |                 |               | GC22     |              | 0.99433     |
|  |                |                  |                |               |                 |               | HEATR58  |              | 0.98017     |
|  |                |                  |                |               |                 |               | IFNAK1   |              | 0.98849     |
|  |                |                  |                |               |                 |               | ITFC1    |              | 0.98838     |
|  |                |                  |                |               |                 |               | JKAMP    |              | 0.98943     |
|  |                |                  |                |               |                 |               | KANK1    |              | 0.87035     |
|  |                |                  |                |               |                 |               | KIAA0586 |              | 0.94795     |
|  |                |                  |                |               |                 |               | KIAA1217 |              | 0.86983     |
|  |                |                  |                |               |                 |               | KLF3     |              | 0.98906     |
|  |                |                  |                |               |                 |               | LRP6     |              | 0.98944     |
|  |                |                  |                |               |                 |               | MDN1     |              | 0.98775     |
|  |                |                  |                |               |                 |               | MGAT5    |              | 0.94879     |
|  |                |                  |                |               |                 |               | MKLN1    |              | 0.97583     |
|  |                |                  |                |               |                 |               | NUCB2    |              | 0.95190     |
|  |                |                  |                |               |                 |               | PARP11   |              | 0.94946     |
|  |                |                  |                |               |                 |               | PCW1     |              | 0.86684     |
|  |                |                  |                |               |                 |               | PHF12    |              | 0.92670     |
|  |                |                  |                |               |                 |               | PKP1     |              | 0.89199     |
|  |                |                  |                |               |                 |               | PRDM5    |              | 0.97263     |
|  |                |                  |                |               |                 |               | PRUNE2   |              | 0.99097     |
|  |                |                  |                |               |                 |               | RAB27B   |              | 0.97326     |
|  |                |                  |                |               |                 |               | RANBP2   |              | 0.98624     |
|  |                |                  |                |               |                 |               | RFK3     |              | 0.88477     |
|  |                |                  |                |               |                 |               | RHPN2    |              | 0.95052     |
|  |                |                  |                |               |                 |               | RPL7L1   |              | 0.94835     |
|  |                |                  |                |               |                 |               | RPRD1A   |              | 0.92867     |
|  |                |                  |                |               |                 |               | RSPH3    |              | 0.98319     |
|  |                |                  |                |               |                 |               | RTN4     |              | 0.93223     |
|  |                |                  |                |               |                 |               | SAR1B    |              | 0.98524     |
|  |                |                  |                |               |                 |               | SCARB2   |              | 0.95923     |
|  |                |                  |                |               |                 |               | SEC23B   |              | 0.98403     |
|  |                |                  |                |               |                 |               | SEC63    |              | 0.92672     |
|  |                |                  |                |               |                 |               | SEL1L    |              | 0.94205     |
|  |                |                  |                |               |                 |               | SEL1L3   |              | 0.95922     |
|  |                |                  |                |               |                 |               | SLC4A7   |              | 0.98059     |
|  |                |                  |                |               |                 |               | SNX25    |              | 0.88941     |
|  |                |                  |                |               |                 |               | SQAT1    |              | 0.98532     |
|  |                |                  |                |               |                 |               | SPG11    |              | 0.98916     |
|  |                |                  |                |               |                 |               | SWT1     |              | 0.88444     |
|  |                |                  |                |               |                 |               | TBC1D4   |              | 0.98831     |
|  |                |                  |                |               |                 |               | TEK2     |              | 0.97098     |
|  |                |                  |                |               |                 |               | TFOP2    |              | 0.98605     |
|  |                |                  |                |               |                 |               | TGOLN2   |              | 0.99083     |
|  |                |                  |                |               |                 |               | THRAP3   |              | 0.98454     |
|  |                |                  |                |               |                 |               | TMED7    |              | 0.96075     |
|  |                |                  |                |               |                 |               | TMEM131  |              | 0.93830     |
|  |                |                  |                |               |                 |               | TMEM10A  |              | 0.93123     |
|  |                |                  |                |               |                 |               | TMEM38A  |              | 0.97218     |
|  |                |                  |                |               |                 |               | TMEM87B  |              | 0.98770     |
|  |                |                  |                |               |                 |               | TSPAN31  |              | 0.90198     |
|  |                |                  |                |               |                 |               | UHL1     |              | 0.93157     |
|  |                |                  |                |               |                 |               | UTRN     |              | 0.99247     |
|  |                |                  |                |               |                 |               | XPNPBP1  |              | 0.96818     |
|  |                |                  |                |               |                 |               | YTHDC2   |              | 0.96239     |
|  |                |                  |                |               |                 |               | ZC3HAV1L |              | 0.95579     |
|  |                |                  |                |               |                 |               | SNAP23   |              | 0.98176     |
|  |                |                  |                |               |                 |               | SEB2     |              | 0.98047     |
|  |                |                  |                |               |                 |               | B2M      |              | 0.96543     |
|  |                |                  |                |               |                 |               | PICO     |              | 0.98897     |
|  |                |                  |                |               |                 |               | RSPRY1   |              | 0.97397     |
|  |                |                  |                |               |                 |               | SDNP8    |              | 0.98423     |
|  |                |                  |                |               |                 |               | SNR2     |              | 0.99292     |
|  |                |                  |                |               |                 |               | ZBTB4    |              | 0.92244     |
|  |                |                  |                |               |                 |               | ABCA5    |              | 0.96477     |
|  |                |                  |                |               |                 |               | ADPRHL1  |              | 0.97748     |
|  |                |                  |                |               |                 |               | ANKRD31  |              | 0.82085     |
|  |                |                  |                |               |                 |               | ABMCX5   |              | 0.99407     |
|  |                |                  |                |               |                 |               | ATAD1    |              | 0.98070     |
|  |                |                  |                |               |                 |               | ATP2A1   |              | 0.99371     |
|  |                |                  |                |               |                 |               | AUH      |              | 0.95796     |
|  |                |                  |                |               |                 |               | BEND6    |              | 0.93966     |
|  |                |                  |                |               |                 |               | BNP1B    |              | 0.97890     |
|  |                |                  |                |               |                 |               | CACNA2D1 |              | 0.98819     |
|  |                |                  |                |               |                 |               | DDX24    |              | 0.97592     |
|  |                |                  |                |               |                 |               | DSC2     |              | 0.97585     |
|  |                |                  |                |               |                 |               | EDNRB    |              | 0.98273     |
|  |                |                  |                |               |                 |               | EPC1     |              | 0.86675     |
|  |                |                  |                |               |                 |               | FBXO30   |              | 0.98562     |
|  |                |                  |                |               |                 |               | GALC     |              | 0.95838     |
|  |                |                  |                |               |                 |               | IBTK     |              | 0.93966     |
|  |                |                  |                |               |                 |               | IQCH     |              | 0.93206     |
|  |                |                  |                |               |                 |               | IRAK3    |              | 0.87111     |
|  |                |                  |                |               |                 |               | KCNMA1   |              | 0.90733     |
|  |                |                  |                |               |                 |               | LYPLAL1  |              | 0.97440     |
|  |                |                  |                |               |                 |               | MDIC     |              | 0.98067     |
|  |                |                  |                |               |                 |               | MED23    |              | 0.95681     |
|  |                |                  |                |               |                 |               | MIR3     |              | 0.97456     |
|  |                |                  |                |               |                 |               | MPP1     |              | 0.93644     |
|  |                |                  |                |               |                 |               | MPP5     |              | 0.99006     |
|  |                |                  |                |               |                 |               | OPHN1    |              | 0.99738     |
|  |                |                  |                |               |                 |               | PEX7     |              | 0.98973     |
|  |                |                  |                |               |                 |               | PRDM2    |              | 0.97799     |
|  |                |                  |                |               |                 |               | PSEN1    |              | 0.98603     |
|  |                |                  |                |               |                 |               | RFTL     |              | 0.99058     |
|  |                |                  |                |               |                 |               | RTN1     |              | 0.96727     |
|  |                |                  |                |               |                 |               | SF3A1    |              | 0.98528     |
|  |                |                  |                |               |                 |               | SLC30A5  |              | 0.93512     |
|  |                |                  |                |               |                 |               | SLC35A5  |              | 0.94479     |
|  |                |                  |                |               |                 |               | SLC35D1  |              | 0.98803     |
|  |                |                  |                |               |                 |               | SOX5     |              | 0.88816     |
|  |                |                  |                |               |                 |               | SRRB1    |              | 0.95339     |
|  |                |                  |                |               |                 |               | STAM2    |              | 0.93460     |
|  |                |                  |                |               |                 |               | STEAP2   |              | 0.98458     |
|  |                |                  |                |               |                 |               | SYDE2    |              | 0.94190     |
|  |                |                  |                |               |                 |               | TBC1D9   |              | 0.99144     |
|  |                |                  |                |               |                 |               | TM9SF2   |              | 0.96681     |
|  |                |                  |                |               |                 |               | TMCS     |              | 0.96558     |
|  |                |                  |                |               |                 |               | WASF3    |              | 0.93599     |
|  |                |                  |                |               |                 |               | ZDRHC2   |              | 0.99499     |
|  |                |                  |                |               |                 |               | ZFX      |              | 0.98214     |
|  |                |                  |                |               |                 |               | ZKSCAN1  |              | 0.92408     |
|  |                |                  |                |               |                 |               | ZNF827   |              | 0.95798     |
|  |                |                  |                |               |                 |               | ZNF747   |              | 0.92403     |
|  |                |                  |                |               |                 |               | BNIP3    |              | 0.96318     |
|  |                |                  |                |               |                 |               | HSPA5    |              | 0.95008     |
|  |                |                  |                |               |                 |               | KIF5B    |              | 0.96399     |
|  |                |                  |                |               |                 |               | MOGAP1   |              | 0.94723     |
|  |                |                  |                |               |                 |               | PITPNA   |              | 0.94611     |
|  |                |                  |                |               |                 |               | SYT17    |              | 0.98966     |
|  |                |                  |                |               |                 |               | COG7     |              | 0.98389     |
|  |                |                  |                |               |                 |               | PYGO1    |              | 0.97571     |
|  |                |                  |                |               |                 |               | ABHD3    |              | 0.97341     |
|  |                |                  |                |               |                 |               | ACLY     |              | 0.97465     |
|  |                |                  |                |               |                 |               | ADAM9    |              | 0.97269     |
|  |                |                  |                |               |                 |               | AP1G1    |              | 0.98931     |
|  |                |                  |                |               |                 |               | AP3M1    |              | 0.95775     |
|  |                |                  |                |               |                 |               | ASAH2B   |              | 0.96774     |
|  |                |                  |                |               |                 |               | ASRGL1   |              | 0.91920     |
|  |                |                  |                |               |                 |               | CASP7    |              | 0.98132     |
|  |                |                  |                |               |                 |               | CRL1     |              | 0.97145     |
|  |                |                  |                |               |                 |               | CCDC87   |              | 0.99102     |
|  |                |                  |                |               |                 |               | COCS     |              | 0.98060     |
|  |                |                  |                |               |                 |               | CTNND1   |              | 0.96409     |
|  |                |                  |                |               |                 |               | DIP2A    |              | 0.96909     |
|  |                |                  |                |               |                 |               | EPB41    |              | 0.93913     |
|  |                |                  |                |               |                 |               | FAN1     |              | 0.98330     |
|  |                |                  |                |               |                 |               | FCD      |              | 0.96446     |
|  |                |                  |                |               |                 |               | FITM2    |              | 0.90087     |
|  |                |                  |                |               |                 |               | FLVCR1   |              | 0.96355     |
|  |                |                  |                |               |                 |               | KBTBD4   |              | 0.98941     |
|  |                |                  |                |               |                 |               | KLLN     |              | 0.97201     |
|  |                |                  |                |               |                 |               | MAGED2   |              | 0.95300     |
|  |                |                  |                |               |                 |               | MFAP3L   |              | 0.95089     |
|  |                |                  |                |               |                 |               | NCSTN    |              | 0.96530     |
|  |                |                  |                |               |                 |               | PHACTR4  |              | 0.97325     |
|  |                |                  |                |               |                 |               | POGLUT1  |              | 0.98168     |
|  |                |                  |                |               |                 |               | POLR3E   |              | 0.99029     |
|  |                |                  |                |               |                 |               | PPP1R21  |              | 0.97107     |
|  |                |                  |                |               |                 |               | RASSF6   |              | 0.99165     |
|  |                |                  |                |               |                 |               | RBMX1    |              | 0.97319     |
|  |                |                  |                |               |                 |               | SEC24C   |              | 0.97075     |
|  |                |                  |                |               |                 |               | SERPINC5 |              | 0.99088     |
|  |                |                  |                |               |                 |               | SERPINC8 |              | 0.97830     |
|  |                |                  |                |               |                 |               | TM2D1    |              | 0.99121     |
|  |                |                  |                |               |                 |               | TRIM62   |              | 0.93597     |
|  |                |                  |                |               |                 |               | TSPYL4   |              | 0.97535     |
|  |                |                  |                |               |                 |               | TTC30A   |              | 0.98627     |
|  |                |                  |                |               |                 |               | TTC30B   |              | 0.94611     |
|  |                |                  |                |               |                 |               | VRK3     |              | 0.91931     |
|  |                |                  |                |               |                 |               | ZNF407   |              | 0.98605     |

|  | early_above_70 | early_aged_60_70 | early_below_55 | late_above_70 | late_aged_60_70 | late_below_55 | Probe ID | Description | Correlation |
|--|----------------|------------------|----------------|---------------|-----------------|---------------|----------|-------------|-------------|
|  |                |                  |                |               |                 |               | GRIN2D   |             | 0.96185     |
|  |                |                  |                |               |                 |               | HIP1     |             | 0.97842     |
|  |                |                  |                |               |                 |               | MEGF11   |             | 0.95483     |
|  |                |                  |                |               |                 |               | TOX2     |             | 0.96161     |
|  |                |                  |                |               |                 |               | NET1     |             | 0.99020     |
|  |                |                  |                |               |                 |               | ADD2     |             | 0.97209     |
|  |                |                  |                |               |                 |               | CNTN4    |             | 0.94904     |
|  |                |                  |                |               |                 |               | COLEC11  |             | 0.94510     |
|  |                |                  |                |               |                 |               | EFHD1    |             | 0.98407     |
|  |                |                  |                |               |                 |               | PFKM     |             | 0.97315     |
|  |                |                  |                |               |                 |               | TRPM2    |             | 0.97320     |
|  |                |                  |                |               |                 |               | BOLA1    |             | 0.95792     |
|  |                |                  |                |               |                 |               | VASN     |             | 0.94755     |

|  | early_above_70 | early_aged_60_70 | early_below_55 | late_above_70 | late_aged_60_70 | late_below_55 | Probe ID | Description | Correlation |
|--|----------------|------------------|----------------|---------------|-----------------|---------------|----------|-------------|-------------|
|  |                |                  |                |               |                 |               | CCDC50   |             | 0.93546     |
|  |                |                  |                |               |                 |               | FBXL18   |             | 0.95923     |
|  |                |                  |                |               |                 |               | IMPA1    |             | 0.93919     |
|  |                |                  |                |               |                 |               | KDM2B    |             | 0.94360     |
|  |                |                  |                |               |                 |               | NAV1     |             | 0.94667     |
|  |                |                  |                |               |                 |               | STIL     |             | 0.86730     |
|  |                |                  |                |               |                 |               | EFHB     |             | 0.94763     |
|  |                |                  |                |               |                 |               | KCNK5    |             | 0.94842     |
|  |                |                  |                |               |                 |               | AKAP12   |             | 0.94871     |
|  |                |                  |                |               |                 |               | CBLB     |             | 0.95785     |
|  |                |                  |                |               |                 |               | CD180    |             | 0.87782     |
|  |                |                  |                |               |                 |               | EBF3     |             | 0.94175     |
|  |                |                  |                |               |                 |               | HCN2     |             | 0.94081     |
|  |                |                  |                |               |                 |               | HOXD3    |             | 0.99123     |
|  |                |                  |                |               |                 |               | IGSF6    |             | 0.97313     |
|  |                |                  |                |               |                 |               | KHK      |             | 0.97583     |
|  |                |                  |                |               |                 |               | NAV3     |             | 0.96726     |
|  |                |                  |                |               |                 |               | NOD1     |             | 0.88684     |
|  |                |                  |                |               |                 |               | P4HA3    |             | 0.87589     |
|  |                |                  |                |               |                 |               | TCTEX1D1 |             | 0.86085     |
|  |                |                  |                |               |                 |               | ZBP1     |             | 0.94002     |
|  |                |                  |                |               |                 |               | PLXNA1   |             | 0.98086     |
|  |                |                  |                |               |                 |               | GNA12    |             | 0.92805     |
|  |                |                  |                |               |                 |               | ATP8B3   |             | 0.97967     |
|  |                |                  |                |               |                 |               | CARNS1   |             | 0.88446     |
|  |                |                  |                |               |                 |               | CBX8     |             | 0.98515     |
|  |                |                  |                |               |                 |               | FOKK1    |             | 0.97975     |
|  |                |                  |                |               |                 |               | MLLT3    |             | 0.92785     |
|  |                |                  |                |               |                 |               | SNTB1    |             | 0.85813     |

|  | early_above_70 | early_aged_60_70 | early_below_55 | late_above_70 | late_aged_60_70 | late_below_55 | Probe ID | Description | Correlation |
|--|----------------|------------------|----------------|---------------|-----------------|---------------|----------|-------------|-------------|
|  |                |                  |                |               |                 |               | AP3S2    |             | 0.94308     |
|  |                |                  |                |               |                 |               | DGKE     |             | 0.98488     |
|  |                |                  |                |               |                 |               | FOXO3    |             | 0.95550     |
|  |                |                  |                |               |                 |               | KDM4B    |             | 0.91995     |
|  |                |                  |                |               |                 |               | ME1      |             | 0.93710     |
|  |                |                  |                |               |                 |               | PLS1     |             | 0.95310     |
|  |                |                  |                |               |                 |               | RAB18    |             | 0.86705     |
|  |                |                  |                |               |                 |               | SLAIN2   |             | 0.98795     |
|  |                |                  |                |               |                 |               | TBCK     |             | 0.98205     |
|  |                |                  |                |               |                 |               | THOC2    |             | 0.98747     |
|  |                |                  |                |               |                 |               | TMEM117  |             | 0.92543     |
|  |                |                  |                |               |                 |               | UBR3     |             | 0.98820     |
|  |                |                  |                |               |                 |               | UBXN4    |             | 0.90785     |
|  |                |                  |                |               |                 |               | USP34    |             | 0.98160     |
|  |                |                  |                |               |                 |               | CD2AP    |             | 0.94620     |
|  |                |                  |                |               |                 |               | MBD5     |             | 0.97041     |
|  |                |                  |                |               |                 |               | AAGAB    |             | 0.93625     |
|  |                |                  |                |               |                 |               | FNDC3A   |             | 0.98803     |
|  |                |                  |                |               |                 |               | FOLH1    |             | 0.97522     |
|  |                |                  |                |               |                 |               | LARP4B   |             | 0.96076     |
|  |                |                  |                |               |                 |               | PPP3CB   |             | 0.97511     |
|  |                |                  |                |               |                 |               | SCPEP1   |             | 0.96498     |
|  |                |                  |                |               |                 |               | RPL3L    |             | 0.87213     |
|  |                |                  |                |               |                 |               | MANEA    |             | 0.89396     |
|  |                |                  |                |               |                 |               | PMEPA1   |             | 0.91521     |
|  |                |                  |                |               |                 |               | TEAD1    |             | 0.95297     |
|  |                |                  |                |               |                 |               | ZMPSTE24 |             | 0.98503     |

|  | early_above_70 | early_aged_60_70 | early_below_55 | late_above_70 | late_aged_60_70 | late_below_55 | Probe ID  | Descripti... | Correlation |
|--|----------------|------------------|----------------|---------------|-----------------|---------------|-----------|--------------|-------------|
|  |                |                  |                |               |                 |               | AMPD3     |              | 0.99032     |
|  |                |                  |                |               |                 |               | CACNA1D   |              | 0.92225     |
|  |                |                  |                |               |                 |               | CAST      |              | 0.93194     |
|  |                |                  |                |               |                 |               | CCNJL     |              | 0.88727     |
|  |                |                  |                |               |                 |               | FLVCR2    |              | 0.95597     |
|  |                |                  |                |               |                 |               | GGT1      |              | 0.93559     |
|  |                |                  |                |               |                 |               | GHR       |              | 0.95508     |
|  |                |                  |                |               |                 |               | HECW1     |              | 0.93015     |
|  |                |                  |                |               |                 |               | ITPR1     |              | 0.99674     |
|  |                |                  |                |               |                 |               | JAKMIP1   |              | 0.96882     |
|  |                |                  |                |               |                 |               | LAMC2     |              | 0.87107     |
|  |                |                  |                |               |                 |               | MCF2L     |              | 0.92837     |
|  |                |                  |                |               |                 |               | NME1-N... |              | 0.96967     |
|  |                |                  |                |               |                 |               | PDE8B     |              | 0.95009     |
|  |                |                  |                |               |                 |               | PXDN      |              | 0.95053     |
|  |                |                  |                |               |                 |               | SEC22C    |              | 0.89647     |
|  |                |                  |                |               |                 |               | SLC25A12  |              | 0.93401     |
|  |                |                  |                |               |                 |               | SOBP      |              | 0.97418     |
|  |                |                  |                |               |                 |               | SYN2      |              | 0.93131     |
|  |                |                  |                |               |                 |               | TACC1     |              | 0.88580     |
|  |                |                  |                |               |                 |               | TUBA4A    |              | 0.96460     |
|  |                |                  |                |               |                 |               | ZDHHC6    |              | 0.97915     |
|  |                |                  |                |               |                 |               | ZNF304    |              | 0.88255     |
|  |                |                  |                |               |                 |               | MSX2      |              | 0.91250     |
|  |                |                  |                |               |                 |               | RBM20     |              | 0.95065     |
|  |                |                  |                |               |                 |               | SLC50A1   |              | 0.86999     |
|  |                |                  |                |               |                 |               | SVIL      |              | 0.98276     |
|  |                |                  |                |               |                 |               | ANKRD6    |              | 0.98818     |
|  |                |                  |                |               |                 |               | APCDD1    |              | 0.95386     |
|  |                |                  |                |               |                 |               | ATP7B     |              | 0.87622     |
|  |                |                  |                |               |                 |               | COCH      |              | 0.92906     |
|  |                |                  |                |               |                 |               | CRYZ      |              | 0.97656     |
|  |                |                  |                |               |                 |               | DNAJA4    |              | 0.91531     |
|  |                |                  |                |               |                 |               | ECE1      |              | 0.96294     |
|  |                |                  |                |               |                 |               | ECHDC1    |              | 0.98132     |
|  |                |                  |                |               |                 |               | EFR3A     |              | 0.92101     |
|  |                |                  |                |               |                 |               | GALNT14   |              | 0.91649     |
|  |                |                  |                |               |                 |               | GPR180    |              | 0.98583     |
|  |                |                  |                |               |                 |               | LGALS     |              | 0.90203     |
|  |                |                  |                |               |                 |               | LRRC7     |              | 0.95682     |
|  |                |                  |                |               |                 |               | LRRFIP1   |              | 0.98622     |
|  |                |                  |                |               |                 |               | MAP7      |              | 0.94340     |
|  |                |                  |                |               |                 |               | MCOLN3    |              | 0.90673     |
|  |                |                  |                |               |                 |               | MYO1G     |              | 0.95283     |
|  |                |                  |                |               |                 |               | ORC3      |              | 0.92393     |
|  |                |                  |                |               |                 |               | PHIP      |              | 0.87964     |
|  |                |                  |                |               |                 |               | PLIN2     |              | 0.93957     |
|  |                |                  |                |               |                 |               | PPM1B     |              | 0.90939     |
|  |                |                  |                |               |                 |               | PRTFDC1   |              | 0.96482     |
|  |                |                  |                |               |                 |               | RIMS1     |              | 0.86841     |
|  |                |                  |                |               |                 |               | SLC5A4    |              | 0.85370     |
|  |                |                  |                |               |                 |               | SPAG6     |              | 0.89650     |
|  |                |                  |                |               |                 |               | STK17B    |              | 0.95467     |
|  |                |                  |                |               |                 |               | STXBP5L   |              | 0.92545     |
|  |                |                  |                |               |                 |               | TESC      |              | 0.91138     |
|  |                |                  |                |               |                 |               | TGDS      |              | 0.93620     |
|  |                |                  |                |               |                 |               | AMD1      |              | 0.87190     |
|  |                |                  |                |               |                 |               | B3GALNT1  |              | 0.90415     |
|  |                |                  |                |               |                 |               | ID4       |              | 0.91323     |
|  |                |                  |                |               |                 |               | PPP1R10   |              | 0.92929     |
|  |                |                  |                |               |                 |               | FAM178B   |              | 0.84246     |
|  |                |                  |                |               |                 |               | ACOT13    |              | 0.93522     |
|  |                |                  |                |               |                 |               | ARHGAP12  |              | 0.92652     |
|  |                |                  |                |               |                 |               | CDCP1     |              | 0.88712     |
|  |                |                  |                |               |                 |               | ENTPD2    |              | 0.98422     |
|  |                |                  |                |               |                 |               | F3        |              | 0.94697     |
|  |                |                  |                |               |                 |               | ITPKB     |              | 0.94747     |
|  |                |                  |                |               |                 |               | LMAN2L    |              | 0.92275     |
|  |                |                  |                |               |                 |               | PEX13     |              | 0.90886     |
|  |                |                  |                |               |                 |               | PUS10     |              | 0.95640     |
|  |                |                  |                |               |                 |               | STK39     |              | 0.96599     |
|  |                |                  |                |               |                 |               | TBC1D8    |              | 0.93819     |
|  |                |                  |                |               |                 |               | ZNF292    |              | 0.95063     |

|  | early_above_70 | early_aged_60_70 | early_below_55 | late_above_70 | late_aged_60_70 | late_below_55 | Probe ID | Descripti... | Correlation |
|--|----------------|------------------|----------------|---------------|-----------------|---------------|----------|--------------|-------------|
|  |                |                  |                |               |                 |               | ATAD2    |              | 0.88528     |
|  |                |                  |                |               |                 |               | BTX      |              | 0.84096     |
|  |                |                  |                |               |                 |               | C1GALT1  |              | 0.94207     |
|  |                |                  |                |               |                 |               | CDK17    |              | 0.93748     |
|  |                |                  |                |               |                 |               | CENPL    |              | 0.95498     |
|  |                |                  |                |               |                 |               | CEP70    |              | 0.92860     |
|  |                |                  |                |               |                 |               | DCK      |              | 0.94597     |
|  |                |                  |                |               |                 |               | HHEX     |              | 0.95480     |
|  |                |                  |                |               |                 |               | LACTB2   |              | 0.96067     |
|  |                |                  |                |               |                 |               | MPHOSPH9 |              | 0.95932     |
|  |                |                  |                |               |                 |               | OPTN     |              | 0.88235     |
|  |                |                  |                |               |                 |               | OSBPL10  |              | 0.98813     |
|  |                |                  |                |               |                 |               | PRDM16   |              | 0.96774     |
|  |                |                  |                |               |                 |               | RNF19A   |              | 0.99150     |
|  |                |                  |                |               |                 |               | SKAP2    |              | 0.88520     |
|  |                |                  |                |               |                 |               | SLC19A2  |              | 0.95399     |
|  |                |                  |                |               |                 |               | SLC37A3  |              | 0.97494     |
|  |                |                  |                |               |                 |               | SLCO5A1  |              | 0.96739     |
|  |                |                  |                |               |                 |               | SPIN1    |              | 0.95551     |
|  |                |                  |                |               |                 |               | TGFB1    |              | 0.84884     |
|  |                |                  |                |               |                 |               | TRIM14   |              | 0.89938     |
|  |                |                  |                |               |                 |               | UBE2W    |              | 0.98465     |
|  |                |                  |                |               |                 |               | UNC13A   |              | 0.95658     |
|  |                |                  |                |               |                 |               | VEZT     |              | 0.96775     |
|  |                |                  |                |               |                 |               | SPRY4    |              | 0.97373     |
|  |                |                  |                |               |                 |               | AIDA     |              | 0.95190     |
|  |                |                  |                |               |                 |               | C16orf72 |              | 0.95549     |
|  |                |                  |                |               |                 |               | GPSM3    |              | 0.78111     |
|  |                |                  |                |               |                 |               | ZNRF2    |              | 0.98490     |
|  |                |                  |                |               |                 |               | ABI3BP   |              | 0.88456     |
|  |                |                  |                |               |                 |               | ANGPT2   |              | 0.98540     |
|  |                |                  |                |               |                 |               | APPL1    |              | 0.97997     |
|  |                |                  |                |               |                 |               | ATP6V1C1 |              | 0.96564     |
|  |                |                  |                |               |                 |               | BANK1    |              | 0.77133     |
|  |                |                  |                |               |                 |               | CD86     |              | 0.84568     |
|  |                |                  |                |               |                 |               | CDON     |              | 0.94176     |
|  |                |                  |                |               |                 |               | CDR2     |              | 0.96464     |
|  |                |                  |                |               |                 |               | CDYL     |              | 0.98264     |
|  |                |                  |                |               |                 |               | CTNNA1   |              | 0.96497     |
|  |                |                  |                |               |                 |               | DEK      |              | 0.97099     |
|  |                |                  |                |               |                 |               | DNAJC5B  |              | 0.89787     |
|  |                |                  |                |               |                 |               | FAM124B  |              | 0.79614     |
|  |                |                  |                |               |                 |               | GLIPR1   |              | 0.96289     |
|  |                |                  |                |               |                 |               | IL12RB1  |              | 0.84569     |
|  |                |                  |                |               |                 |               | IL2RA    |              | 0.88158     |
|  |                |                  |                |               |                 |               | KRAS     |              | 0.94213     |
|  |                |                  |                |               |                 |               | NDE1     |              | 0.94493     |
|  |                |                  |                |               |                 |               | NLGN4X   |              | 0.91293     |
|  |                |                  |                |               |                 |               | PDGFB    |              | 0.93524     |
|  |                |                  |                |               |                 |               | PHF6     |              | 0.97432     |
|  |                |                  |                |               |                 |               | POSTN    |              | 0.88377     |
|  |                |                  |                |               |                 |               | PTBP3    |              | 0.98299     |
|  |                |                  |                |               |                 |               | QKI      |              | 0.96793     |
|  |                |                  |                |               |                 |               | SMC2     |              | 0.96257     |
|  |                |                  |                |               |                 |               | STAU2    |              | 0.97090     |
|  |                |                  |                |               |                 |               | TRIM32   |              | 0.93410     |
|  |                |                  |                |               |                 |               | ZFP30    |              | 0.91007     |
|  |                |                  |                |               |                 |               | SHC4     |              | 0.94482     |
|  |                |                  |                |               |                 |               | BICD2    |              | 0.93708     |
|  |                |                  |                |               |                 |               | KIAA0825 |              | 0.94361     |
|  |                |                  |                |               |                 |               | ANP32E   |              | 0.98242     |
|  |                |                  |                |               |                 |               | ATP6V1G2 |              | 0.97841     |
|  |                |                  |                |               |                 |               | E2F3     |              | 0.97641     |
|  |                |                  |                |               |                 |               | FAR1     |              | 0.95809     |
|  |                |                  |                |               |                 |               | MASTL    |              | 0.92832     |
|  |                |                  |                |               |                 |               | PATL1    |              | 0.98578     |
|  |                |                  |                |               |                 |               | PTCH1    |              | 0.93870     |
|  |                |                  |                |               |                 |               | RAB6A    |              | 0.94744     |
|  |                |                  |                |               |                 |               | RIPK2    |              | 0.94528     |
|  |                |                  |                |               |                 |               | RM11     |              | 0.90599     |
|  |                |                  |                |               |                 |               | SMC6     |              | 0.96792     |
|  |                |                  |                |               |                 |               | ZBTB34   |              | 0.96080     |
|  |                |                  |                |               |                 |               | ZBTB43   |              | 0.96809     |
|  |                |                  |                |               |                 |               | ZNF217   |              | 0.88040     |

|  | early_above_70 | early_aged_60_70 | early_below_55 | late_above_70 | late_aged_60_70 | late_below_55 | Probe ID | Description | Correlation |
|--|----------------|------------------|----------------|---------------|-----------------|---------------|----------|-------------|-------------|
|  |                |                  |                |               |                 |               | AHR      |             | 0.95293     |
|  |                |                  |                |               |                 |               | CASP10   |             | 0.98898     |
|  |                |                  |                |               |                 |               | CCDC3    |             | 0.91659     |
|  |                |                  |                |               |                 |               | KIF26A   |             | 0.97591     |
|  |                |                  |                |               |                 |               | MAP3K12  |             | 0.97749     |
|  |                |                  |                |               |                 |               | MAP4K1   |             | 0.95639     |
|  |                |                  |                |               |                 |               | MOB3B    |             | 0.98675     |
|  |                |                  |                |               |                 |               | PDZD2    |             | 0.96420     |
|  |                |                  |                |               |                 |               | PDZD7    |             | 0.90098     |
|  |                |                  |                |               |                 |               | ENC1     |             | 0.91482     |
|  |                |                  |                |               |                 |               | ADCY3    |             | 0.96020     |
|  |                |                  |                |               |                 |               | CFH      |             | 0.94514     |
|  |                |                  |                |               |                 |               | ECM2     |             | 0.93626     |
|  |                |                  |                |               |                 |               | ESR1     |             | 0.95937     |
|  |                |                  |                |               |                 |               | FGD2     |             | 0.95052     |
|  |                |                  |                |               |                 |               | FGF1     |             | 0.96466     |
|  |                |                  |                |               |                 |               | JAK3     |             | 0.95795     |
|  |                |                  |                |               |                 |               | MAP7D3   |             | 0.95115     |
|  |                |                  |                |               |                 |               | MDGA1    |             | 0.94734     |
|  |                |                  |                |               |                 |               | MYO1F    |             | 0.90331     |
|  |                |                  |                |               |                 |               | PLCB2    |             | 0.90463     |
|  |                |                  |                |               |                 |               | PLXND1   |             | 0.96190     |
|  |                |                  |                |               |                 |               | PRRX1    |             | 0.95311     |
|  |                |                  |                |               |                 |               | PZP      |             | 0.88888     |
|  |                |                  |                |               |                 |               | TSPAN32  |             | 0.94603     |
|  |                |                  |                |               |                 |               | VASH1    |             | 0.97463     |
|  |                |                  |                |               |                 |               | ZBTB46   |             | 0.99577     |
|  |                |                  |                |               |                 |               | GIMAP1   |             | 0.95608     |
|  |                |                  |                |               |                 |               | TTYH2    |             | 0.96594     |
|  |                |                  |                |               |                 |               | FBN1     |             | 0.86659     |
|  |                |                  |                |               |                 |               | KIF21B   |             | 0.96926     |
|  |                |                  |                |               |                 |               | LAIR1    |             | 0.95861     |
|  |                |                  |                |               |                 |               | MMRN2    |             | 0.97584     |
|  |                |                  |                |               |                 |               | RCAN2    |             | 0.94459     |
|  |                |                  |                |               |                 |               | SYNGAP1  |             | 0.90438     |
|  |                |                  |                |               |                 |               | SYT11    |             | 0.95508     |
|  |                |                  |                |               |                 |               | ZEB2     |             | 0.94180     |



|  | early_above_70 | early_aged_60_70 | early_below_55 | late_above_70 | late_aged_60_70 | late_below_55 | Probe ID | Description | Correlation |
|--|----------------|------------------|----------------|---------------|-----------------|---------------|----------|-------------|-------------|
|  |                |                  |                |               |                 |               | ASB3     |             | 0.89537     |
|  |                |                  |                |               |                 |               | CNTLN    |             | 0.92192     |
|  |                |                  |                |               |                 |               | HPCAL1   |             | 0.91529     |
|  |                |                  |                |               |                 |               | MYO16    |             | 0.93075     |
|  |                |                  |                |               |                 |               | REEP1    |             | 0.87643     |
|  |                |                  |                |               |                 |               | WNT3     |             | 0.89665     |
|  |                |                  |                |               |                 |               | CCDC112  |             | 0.82251     |
|  |                |                  |                |               |                 |               | MZT1     |             | 0.94410     |
|  |                |                  |                |               |                 |               | FADS1    |             | 0.97311     |
|  |                |                  |                |               |                 |               | ZNF608   |             | 0.88138     |
|  |                |                  |                |               |                 |               | HOXA7    |             | 0.77122     |
|  |                |                  |                |               |                 |               | LNK1     |             | 0.81629     |
|  |                |                  |                |               |                 |               | PM20D2   |             | 0.88073     |
|  |                |                  |                |               |                 |               | RARS2    |             | 0.86646     |
|  |                |                  |                |               |                 |               | RBX1     |             | 0.74651     |
|  |                |                  |                |               |                 |               | RCN2     |             | 0.89659     |
|  |                |                  |                |               |                 |               | SERTAD4  |             | 0.73541     |
|  |                |                  |                |               |                 |               | SH3RF1   |             | 0.75052     |
|  |                |                  |                |               |                 |               | ARSK     |             | 0.95477     |
|  |                |                  |                |               |                 |               | ZNF550   |             | 0.93046     |
|  |                |                  |                |               |                 |               | FAM169A  |             | 0.76832     |
|  |                |                  |                |               |                 |               | GPR160   |             | 0.90974     |
|  |                |                  |                |               |                 |               | PKD1L1   |             | 0.98133     |
|  |                |                  |                |               |                 |               | RFESD    |             | 0.95260     |
|  |                |                  |                |               |                 |               | TWF1     |             | 0.73154     |

|  | early_above_70 | early_aged_60_70 | early_below_55 | late_above_70 | late_aged_60_70 | late_below_55 | Probe ID | Description | Correlation |
|--|----------------|------------------|----------------|---------------|-----------------|---------------|----------|-------------|-------------|
|  |                |                  |                |               |                 |               | CCDC88A  |             | 0.99080     |
|  |                |                  |                |               |                 |               | HDAC4    |             | 0.96700     |
|  |                |                  |                |               |                 |               | KHNYN    |             | 0.92283     |
|  |                |                  |                |               |                 |               | RORA     |             | 0.98541     |
|  |                |                  |                |               |                 |               | TMEM168  |             | 0.99025     |
|  |                |                  |                |               |                 |               | ZBTB32   |             | 0.96482     |
|  |                |                  |                |               |                 |               | ADAM28   |             | 0.96304     |
|  |                |                  |                |               |                 |               | CEP170   |             | 0.95355     |
|  |                |                  |                |               |                 |               | HSPG2    |             | 0.96059     |
|  |                |                  |                |               |                 |               | IFIH1    |             | 0.98867     |
|  |                |                  |                |               |                 |               | ZEB1     |             | 0.93898     |
|  |                |                  |                |               |                 |               | ZNF175   |             | 0.99252     |
|  |                |                  |                |               |                 |               | FAT1     |             | 0.96213     |
|  |                |                  |                |               |                 |               | PRKG1    |             | 0.97635     |

|  | early_above_70 | early_aged_60_70 | early_below_55 | late_above_70 | late_aged_60_70 | late_below_55 | Probe ID | Description | Correlation |
|--|----------------|------------------|----------------|---------------|-----------------|---------------|----------|-------------|-------------|
|  |                |                  |                |               |                 |               | CCP110   |             | 0.97351     |
|  |                |                  |                |               |                 |               | INHBA    |             | 0.98088     |
|  |                |                  |                |               |                 |               | OSBPL8   |             | 0.92376     |
|  |                |                  |                |               |                 |               | PTPN22   |             | 0.90799     |
|  |                |                  |                |               |                 |               | TIAM2    |             | 0.96386     |
|  |                |                  |                |               |                 |               | TTC21B   |             | 0.98681     |
|  |                |                  |                |               |                 |               | KCNH4    |             | 0.93301     |
|  |                |                  |                |               |                 |               | MMP16    |             | 0.89421     |
|  |                |                  |                |               |                 |               | SNX16    |             | 0.97297     |
|  |                |                  |                |               |                 |               | SPATA25  |             | 0.84142     |
|  |                |                  |                |               |                 |               | ZNF280C  |             | 0.97548     |
|  |                |                  |                |               |                 |               | YEATS2   |             | 0.95856     |
|  |                |                  |                |               |                 |               | ZNF782   |             | 0.95923     |
|  |                |                  |                |               |                 |               | FAM102B  |             | 0.88797     |
|  |                |                  |                |               |                 |               | HOXC4    |             | 0.92859     |
|  |                |                  |                |               |                 |               | INCENP   |             | 0.93751     |
|  |                |                  |                |               |                 |               | RSBN1L   |             | 0.98440     |
|  |                |                  |                |               |                 |               | ZNF624   |             | 0.96951     |

|  | early_above_70 | early_aged_60_70 | early_below_55 | late_above_70 | late_aged_60_70 | late_below_55 | Probe ID | Descripti... | Correlation |
|--|----------------|------------------|----------------|---------------|-----------------|---------------|----------|--------------|-------------|
|  |                |                  |                |               |                 |               | ANLN     |              | 0.98889     |
|  |                |                  |                |               |                 |               | ASPM     |              | 0.98785     |
|  |                |                  |                |               |                 |               | BBC3     |              | 0.97839     |
|  |                |                  |                |               |                 |               | BIRC5    |              | 0.96922     |
|  |                |                  |                |               |                 |               | C1QTNF6  |              | 0.92259     |
|  |                |                  |                |               |                 |               | CCM2     |              | 0.94920     |
|  |                |                  |                |               |                 |               | CCNA2    |              | 0.98594     |
|  |                |                  |                |               |                 |               | CDC25B   |              | 0.97920     |
|  |                |                  |                |               |                 |               | CDKN3    |              | 0.97916     |
|  |                |                  |                |               |                 |               | CHEK1    |              | 0.93734     |
|  |                |                  |                |               |                 |               | DHH      |              | 0.98743     |
|  |                |                  |                |               |                 |               | E2F1     |              | 0.98930     |
|  |                |                  |                |               |                 |               | ERF      |              | 0.97495     |
|  |                |                  |                |               |                 |               | GGCT     |              | 0.96420     |
|  |                |                  |                |               |                 |               | HMMR     |              | 0.98797     |
|  |                |                  |                |               |                 |               | HOXB3    |              | 0.96461     |
|  |                |                  |                |               |                 |               | KLF10    |              | 0.96765     |
|  |                |                  |                |               |                 |               | MAL2     |              | 0.97698     |
|  |                |                  |                |               |                 |               | MALSU1   |              | 0.98853     |
|  |                |                  |                |               |                 |               | MSL3     |              | 0.95841     |
|  |                |                  |                |               |                 |               | MTHFD1L  |              | 0.98762     |
|  |                |                  |                |               |                 |               | NCAPG    |              | 0.98592     |
|  |                |                  |                |               |                 |               | NUF2     |              | 0.98911     |
|  |                |                  |                |               |                 |               | PABPC1   |              | 0.98385     |
|  |                |                  |                |               |                 |               | PKIB     |              | 0.90673     |
|  |                |                  |                |               |                 |               | PMAIP1   |              | 0.93323     |
|  |                |                  |                |               |                 |               | PRR11    |              | 0.99537     |
|  |                |                  |                |               |                 |               | RPA3     |              | 0.98204     |
|  |                |                  |                |               |                 |               | SKA1     |              | 0.98589     |
|  |                |                  |                |               |                 |               | SPC25    |              | 0.99261     |
|  |                |                  |                |               |                 |               | WDR62    |              | 0.99162     |
|  |                |                  |                |               |                 |               | TCF19    |              | 0.98320     |
|  |                |                  |                |               |                 |               | CDC25C   |              | 0.97294     |
|  |                |                  |                |               |                 |               | CIT      |              | 0.99198     |
|  |                |                  |                |               |                 |               | LIG1     |              | 0.98530     |
|  |                |                  |                |               |                 |               | NDUFA4L2 |              | 0.91604     |
|  |                |                  |                |               |                 |               | ARR3     |              | 0.96605     |
|  |                |                  |                |               |                 |               | BCAS4    |              | 0.98032     |
|  |                |                  |                |               |                 |               | CDC7     |              | 0.93833     |
|  |                |                  |                |               |                 |               | CDCA5    |              | 0.98333     |
|  |                |                  |                |               |                 |               | CENPF    |              | 0.98934     |
|  |                |                  |                |               |                 |               | CEP55    |              | 0.99013     |
|  |                |                  |                |               |                 |               | CLEC2D   |              | 0.97460     |
|  |                |                  |                |               |                 |               | DTL      |              | 0.98180     |
|  |                |                  |                |               |                 |               | GIN51    |              | 0.97895     |
|  |                |                  |                |               |                 |               | IGFBP3   |              | 0.90134     |
|  |                |                  |                |               |                 |               | KIF20A   |              | 0.98019     |
|  |                |                  |                |               |                 |               | KIF4A    |              | 0.99045     |
|  |                |                  |                |               |                 |               | LY86     |              | 0.96267     |
|  |                |                  |                |               |                 |               | MCM10    |              | 0.98900     |
|  |                |                  |                |               |                 |               | NUSAP1   |              | 0.99006     |
|  |                |                  |                |               |                 |               | PCDHB10  |              | 0.84765     |
|  |                |                  |                |               |                 |               | SPP1     |              | 0.94560     |
|  |                |                  |                |               |                 |               | CCNB2    |              | 0.97689     |
|  |                |                  |                |               |                 |               | KIF2C    |              | 0.99078     |
|  |                |                  |                |               |                 |               | MRPS6    |              | 0.98820     |
|  |                |                  |                |               |                 |               | PTCH2    |              | 0.93723     |
|  |                |                  |                |               |                 |               | AIF1     |              | 0.94659     |
|  |                |                  |                |               |                 |               | RAB3IL1  |              | 0.94338     |
|  |                |                  |                |               |                 |               | AMDHD2   |              | 0.97316     |
|  |                |                  |                |               |                 |               | AURKB    |              | 0.97031     |
|  |                |                  |                |               |                 |               | C11orf80 |              | 0.93138     |
|  |                |                  |                |               |                 |               | C1QB     |              | 0.83334     |
|  |                |                  |                |               |                 |               | CDK18    |              | 0.93848     |
|  |                |                  |                |               |                 |               | CENPM    |              | 0.95659     |
|  |                |                  |                |               |                 |               | E2F2     |              | 0.98564     |
|  |                |                  |                |               |                 |               | EME1     |              | 0.99382     |
|  |                |                  |                |               |                 |               | ENTPD8   |              | 0.96510     |
|  |                |                  |                |               |                 |               | ESPL1    |              | 0.98951     |
|  |                |                  |                |               |                 |               | EXO1     |              | 0.98608     |
|  |                |                  |                |               |                 |               | FBX1     |              | 0.96717     |
|  |                |                  |                |               |                 |               | GPR35    |              | 0.98438     |
|  |                |                  |                |               |                 |               | GTSE1    |              | 0.98837     |
|  |                |                  |                |               |                 |               | HOXB6    |              | 0.98291     |
|  |                |                  |                |               |                 |               | MCM3     |              | 0.98036     |
|  |                |                  |                |               |                 |               | MCM5     |              | 0.99209     |
|  |                |                  |                |               |                 |               | MGAT4B   |              | 0.95466     |
|  |                |                  |                |               |                 |               | NCAPI    |              | 0.99389     |
|  |                |                  |                |               |                 |               | NEIL3    |              | 0.98174     |
|  |                |                  |                |               |                 |               | NKG7     |              | 0.85049     |
|  |                |                  |                |               |                 |               | NRGN     |              | 0.96667     |
|  |                |                  |                |               |                 |               | NTM      |              | 0.99057     |
|  |                |                  |                |               |                 |               | OASL     |              | 0.99296     |
|  |                |                  |                |               |                 |               | PKN3     |              | 0.91814     |
|  |                |                  |                |               |                 |               | RAD51    |              | 0.95867     |
|  |                |                  |                |               |                 |               | RFC4     |              | 0.99232     |
|  |                |                  |                |               |                 |               | RGS16    |              | 0.86429     |
|  |                |                  |                |               |                 |               | RRM2     |              | 0.98578     |
|  |                |                  |                |               |                 |               | SHCBP1   |              | 0.97496     |
|  |                |                  |                |               |                 |               | SHMT2    |              | 0.96476     |
|  |                |                  |                |               |                 |               | SKA3     |              | 0.97800     |
|  |                |                  |                |               |                 |               | SPAG5    |              | 0.99239     |
|  |                |                  |                |               |                 |               | TACC3    |              | 0.98796     |
|  |                |                  |                |               |                 |               | TBX2     |              | 0.83775     |
|  |                |                  |                |               |                 |               | TCTEX1D2 |              | 0.99694     |
|  |                |                  |                |               |                 |               | TONSL    |              | 0.98501     |
|  |                |                  |                |               |                 |               | TOP2A    |              | 0.98366     |
|  |                |                  |                |               |                 |               | TPX2     |              | 0.99153     |
|  |                |                  |                |               |                 |               | WDR34    |              | 0.92387     |
|  |                |                  |                |               |                 |               | WDR76    |              | 0.98774     |



|  | early_above_70 | early_aged_60_70 | early_below_55 | late_above_70 | late_aged_60_70 | late_below_55 | Probe ID | Descripti... | Correlation |
|--|----------------|------------------|----------------|---------------|-----------------|---------------|----------|--------------|-------------|
|  |                |                  |                |               |                 |               | ANKHD1   |              | 0.99856     |
|  |                |                  |                |               |                 |               | ARL4A    |              | 0.94944     |
|  |                |                  |                |               |                 |               | GTF3A    |              | 0.96330     |
|  |                |                  |                |               |                 |               | HNRNPA1  |              | 0.98576     |
|  |                |                  |                |               |                 |               | KCNIP2   |              | 0.94611     |
|  |                |                  |                |               |                 |               | MAZ      |              | 0.89522     |
|  |                |                  |                |               |                 |               | MRO      |              | 0.50681     |
|  |                |                  |                |               |                 |               | MRPS25   |              | 0.98286     |
|  |                |                  |                |               |                 |               | NOP16    |              | 0.96977     |
|  |                |                  |                |               |                 |               | PABPC1L  |              | 0.80821     |
|  |                |                  |                |               |                 |               | RPL6     |              | 0.97370     |
|  |                |                  |                |               |                 |               | RPS13    |              | 0.99435     |
|  |                |                  |                |               |                 |               | RPS20    |              | 0.98036     |
|  |                |                  |                |               |                 |               | THOC1    |              | 0.91968     |
|  |                |                  |                |               |                 |               | TSNAXIP1 |              | 0.96801     |
|  |                |                  |                |               |                 |               | TWIST1   |              | 0.91289     |
|  |                |                  |                |               |                 |               | RPS14    |              | 0.99414     |
|  |                |                  |                |               |                 |               | RPS3A    |              | 0.96657     |
|  |                |                  |                |               |                 |               | RPL38    |              | 0.98570     |
|  |                |                  |                |               |                 |               | RPS29    |              | 0.96889     |
|  |                |                  |                |               |                 |               | RPL24    |              | 0.98976     |
|  |                |                  |                |               |                 |               | A18G     |              | 0.91517     |
|  |                |                  |                |               |                 |               | ASGR1    |              | 0.97622     |
|  |                |                  |                |               |                 |               | BMX      |              | 0.95038     |
|  |                |                  |                |               |                 |               | BZW2     |              | 0.96404     |
|  |                |                  |                |               |                 |               | C18orf21 |              | 0.98896     |
|  |                |                  |                |               |                 |               | CDCA7    |              | 0.94896     |
|  |                |                  |                |               |                 |               | CHKA     |              | 0.98680     |
|  |                |                  |                |               |                 |               | CTNNA2   |              | 0.84933     |
|  |                |                  |                |               |                 |               | PIN4     |              | 0.96724     |
|  |                |                  |                |               |                 |               | PKN1     |              | 0.95732     |
|  |                |                  |                |               |                 |               | RBP4     |              | 0.80302     |
|  |                |                  |                |               |                 |               | RPS25    |              | 0.98696     |
|  |                |                  |                |               |                 |               | GDF9     |              | 0.88033     |
|  |                |                  |                |               |                 |               | SOX12    |              | 0.98391     |
|  |                |                  |                |               |                 |               | ALKBH2   |              | 0.92598     |
|  |                |                  |                |               |                 |               | CPSF4    |              | 0.95069     |
|  |                |                  |                |               |                 |               | CSAD     |              | 0.83754     |
|  |                |                  |                |               |                 |               | KCNAB3   |              | 0.99423     |
|  |                |                  |                |               |                 |               | NHP2     |              | 0.98471     |
|  |                |                  |                |               |                 |               | NPM3     |              | 0.98329     |
|  |                |                  |                |               |                 |               | PAQR8    |              | 0.89402     |
|  |                |                  |                |               |                 |               | POLR2H   |              | 0.98649     |
|  |                |                  |                |               |                 |               | RCE1     |              | 0.97914     |
|  |                |                  |                |               |                 |               | RPL27    |              | 0.99689     |
|  |                |                  |                |               |                 |               | RPL31    |              | 0.98320     |
|  |                |                  |                |               |                 |               | RPL35A   |              | 0.95955     |
|  |                |                  |                |               |                 |               | RPL7A    |              | 0.96756     |
|  |                |                  |                |               |                 |               | RPL8     |              | 0.98635     |
|  |                |                  |                |               |                 |               | RPS18    |              | 0.99032     |
|  |                |                  |                |               |                 |               | S100A3   |              | 0.63751     |
|  |                |                  |                |               |                 |               | SEC31B   |              | 0.73818     |
|  |                |                  |                |               |                 |               | TIMM9    |              | 0.99210     |
|  |                |                  |                |               |                 |               | ZNF3     |              | 0.93661     |
|  |                |                  |                |               |                 |               | ZNF581   |              | 0.97701     |

|  | early_above_70 | early_aged_60_70 | early_below_55 | late_above_70 | late_aged_60_70 | late_below_55 | Probe ID | Description | Correlation |
|--|----------------|------------------|----------------|---------------|-----------------|---------------|----------|-------------|-------------|
|  |                |                  |                |               |                 |               | AKAP11   |             | 0.99261     |
|  |                |                  |                |               |                 |               | DOCK9    |             | 0.96870     |
|  |                |                  |                |               |                 |               | GBE1     |             | 0.95608     |
|  |                |                  |                |               |                 |               | HSDL2    |             | 0.99266     |
|  |                |                  |                |               |                 |               | KBTBD7   |             | 0.96688     |
|  |                |                  |                |               |                 |               | LGMN     |             | 0.94035     |
|  |                |                  |                |               |                 |               | LRRK1    |             | 0.96137     |
|  |                |                  |                |               |                 |               | OSTM1    |             | 0.97889     |
|  |                |                  |                |               |                 |               | PRKAR1A  |             | 0.98815     |
|  |                |                  |                |               |                 |               | SCRN1    |             | 0.95407     |
|  |                |                  |                |               |                 |               | SLC39A9  |             | 0.97951     |
|  |                |                  |                |               |                 |               | TMEM106B |             | 0.94960     |
|  |                |                  |                |               |                 |               | TNKS2    |             | 0.96582     |
|  |                |                  |                |               |                 |               | YME1L1   |             | 0.98143     |
|  |                |                  |                |               |                 |               | ZFYVE16  |             | 0.96731     |
|  |                |                  |                |               |                 |               | HSPA1A   |             | 0.86653     |
|  |                |                  |                |               |                 |               | TAF13    |             | 0.98243     |
|  |                |                  |                |               |                 |               | ABHD13   |             | 0.99145     |
|  |                |                  |                |               |                 |               | BTBD3    |             | 0.97475     |
|  |                |                  |                |               |                 |               | CNN3     |             | 0.92770     |
|  |                |                  |                |               |                 |               | HOOK1    |             | 0.99853     |
|  |                |                  |                |               |                 |               | IDH1     |             | 0.97617     |
|  |                |                  |                |               |                 |               | KIT      |             | 0.93158     |
|  |                |                  |                |               |                 |               | NPTN     |             | 0.98105     |
|  |                |                  |                |               |                 |               | PDE8A    |             | 0.96135     |
|  |                |                  |                |               |                 |               | PIKFYVE  |             | 0.99465     |
|  |                |                  |                |               |                 |               | SNX1     |             | 0.95745     |
|  |                |                  |                |               |                 |               | UNC79    |             | 0.92649     |
|  |                |                  |                |               |                 |               | USP45    |             | 0.99096     |
|  |                |                  |                |               |                 |               | ZMYND11  |             | 0.97759     |
|  |                |                  |                |               |                 |               | RAB8B    |             | 0.99667     |
|  |                |                  |                |               |                 |               | LRRC8B   |             | 0.98649     |
|  |                |                  |                |               |                 |               | MAP2K1   |             | 0.99505     |
|  |                |                  |                |               |                 |               | PNPO     |             | 0.88108     |
|  |                |                  |                |               |                 |               | SCAMP5   |             | 0.87700     |
|  |                |                  |                |               |                 |               | SCCPDH   |             | 0.97176     |
|  |                |                  |                |               |                 |               | TC2N     |             | 0.96865     |
|  |                |                  |                |               |                 |               | ZNF846   |             | 0.99136     |

|  | early_above_70 | early_aged_60_70 | early_below_55 | late_above_70 | late_aged_60_70 | late_below_55 | Probe ID | Description | Correlation |
|--|----------------|------------------|----------------|---------------|-----------------|---------------|----------|-------------|-------------|
|  |                |                  |                |               |                 |               | GCNT2    |             | 0.93380     |
|  |                |                  |                |               |                 |               | SDK1     |             | 0.85811     |
|  |                |                  |                |               |                 |               | TPT1     |             | 0.86632     |
|  |                |                  |                |               |                 |               | CPO      |             | 0.83093     |
|  |                |                  |                |               |                 |               | EYA4     |             | 0.89185     |
|  |                |                  |                |               |                 |               | FKBP5    |             | 0.92989     |
|  |                |                  |                |               |                 |               | IGSF1    |             | 0.99030     |
|  |                |                  |                |               |                 |               | NDP      |             | 0.91779     |
|  |                |                  |                |               |                 |               | PAGE4    |             | 0.93435     |
|  |                |                  |                |               |                 |               | SLC27A6  |             | 0.96330     |
|  |                |                  |                |               |                 |               | SLC39A8  |             | 0.96399     |
|  |                |                  |                |               |                 |               | ZNF655   |             | 0.94250     |
|  |                |                  |                |               |                 |               | FOXA3    |             | 0.90452     |
|  |                |                  |                |               |                 |               | CDC42EP5 |             | 0.92463     |
|  |                |                  |                |               |                 |               | FAH      |             | 0.85853     |
|  |                |                  |                |               |                 |               | SLC22A4  |             | 0.99162     |

|  | early_above_70 | early_aged_60_70 | early_below_55 | late_above_70 | late_aged_60_70 | late_below_55 | Probe ID | Description | Correlation |
|--|----------------|------------------|----------------|---------------|-----------------|---------------|----------|-------------|-------------|
|  |                |                  |                |               |                 |               | CDC73    |             | 0.97503     |
|  |                |                  |                |               |                 |               | CYB5R3   |             | 0.91567     |
|  |                |                  |                |               |                 |               | FAM13A   |             | 0.95138     |
|  |                |                  |                |               |                 |               | NR3C1    |             | 0.94019     |
|  |                |                  |                |               |                 |               | TMTC3    |             | 0.98910     |
|  |                |                  |                |               |                 |               | ZSWIM6   |             | 0.97476     |
|  |                |                  |                |               |                 |               | TDRKH    |             | 0.97512     |
|  |                |                  |                |               |                 |               | ATF2     |             | 0.98513     |
|  |                |                  |                |               |                 |               | ATG16L1  |             | 0.95625     |
|  |                |                  |                |               |                 |               | DEPTOR   |             | 0.98407     |
|  |                |                  |                |               |                 |               | FOLH1B   |             | 0.98221     |
|  |                |                  |                |               |                 |               | GCA      |             | 0.99189     |
|  |                |                  |                |               |                 |               | KLHL20   |             | 0.97285     |
|  |                |                  |                |               |                 |               | NDRG3    |             | 0.98683     |
|  |                |                  |                |               |                 |               | NFE2L2   |             | 0.96949     |
|  |                |                  |                |               |                 |               | PPIG     |             | 0.98106     |
|  |                |                  |                |               |                 |               | SCRN3    |             | 0.98956     |
|  |                |                  |                |               |                 |               | MTCP1    |             | 0.90825     |
|  |                |                  |                |               |                 |               | LCORL    |             | 0.99931     |
|  |                |                  |                |               |                 |               | ZFY      |             | 0.99618     |

|  | early_above_70 | early_aged_60_70 | early_below_55 | late_above_70 | late_aged_60_70 | late_below_55 | Probe ID | Description | Correlation |
|--|----------------|------------------|----------------|---------------|-----------------|---------------|----------|-------------|-------------|
|  |                |                  |                |               |                 |               | GALNT13  |             | 0.84541     |
|  |                |                  |                |               |                 |               | MT2A     |             | 0.76674     |
|  |                |                  |                |               |                 |               | MYLK3    |             | 0.78607     |
|  |                |                  |                |               |                 |               | PPARGC1A |             | 0.87550     |
|  |                |                  |                |               |                 |               | PRSS16   |             | 0.93819     |
|  |                |                  |                |               |                 |               | SFXN5    |             | 0.74670     |
|  |                |                  |                |               |                 |               | TEKT5    |             | 0.80532     |
|  |                |                  |                |               |                 |               | QPCTL    |             | 0.87257     |
|  |                |                  |                |               |                 |               | GTF3C6   |             | 0.85021     |
|  |                |                  |                |               |                 |               | GLIS1    |             | 0.90892     |
|  |                |                  |                |               |                 |               | BPIFB2   |             | 0.82708     |
|  |                |                  |                |               |                 |               | DSC3     |             | 0.92317     |
|  |                |                  |                |               |                 |               | G0S2     |             | 0.71992     |
|  |                |                  |                |               |                 |               | IGF1     |             | 0.91338     |
|  |                |                  |                |               |                 |               | ISL1     |             | 0.79801     |
|  |                |                  |                |               |                 |               | LRAT     |             | 0.91466     |
|  |                |                  |                |               |                 |               | SNAP25   |             | 0.78967     |
|  |                |                  |                |               |                 |               | STK33    |             | 0.88249     |
|  |                |                  |                |               |                 |               | TBXAS1   |             | 0.89342     |
|  |                |                  |                |               |                 |               | ZNF750   |             | 0.93229     |
|  |                |                  |                |               |                 |               | CPA6     |             | 0.91917     |
|  |                |                  |                |               |                 |               | FKBP1B   |             | 0.89277     |
|  |                |                  |                |               |                 |               | GLDN     |             | 0.84503     |
|  |                |                  |                |               |                 |               | MT1A     |             | 0.94220     |
|  |                |                  |                |               |                 |               | PPIB     |             | 0.86611     |
|  |                |                  |                |               |                 |               | TMEM63A  |             | 0.85047     |
|  |                |                  |                |               |                 |               | TP53I3   |             | 0.89941     |

|  | early_above_70 | early_aged_60_70 | early_below_55 | late_above_70 | late_aged_60_70 | late_below_55 | Probe ID | Description | Correlation |
|--|----------------|------------------|----------------|---------------|-----------------|---------------|----------|-------------|-------------|
|  |                |                  |                |               |                 |               | ABHD11   |             | 0.98481     |
|  |                |                  |                |               |                 |               | CABLES1  |             | 0.78402     |
|  |                |                  |                |               |                 |               | IER3     |             | 0.90020     |
|  |                |                  |                |               |                 |               | PRR7     |             | 0.99279     |
|  |                |                  |                |               |                 |               | ADAMTS13 |             | 0.96395     |
|  |                |                  |                |               |                 |               | IER5     |             | 0.89412     |
|  |                |                  |                |               |                 |               | SPIRE2   |             | 0.99834     |
|  |                |                  |                |               |                 |               | GIGYF1   |             | 0.98344     |
|  |                |                  |                |               |                 |               | GRB7     |             | 0.89504     |
|  |                |                  |                |               |                 |               | HAGHL    |             | 0.97886     |
|  |                |                  |                |               |                 |               | LAG3     |             | 0.90859     |
|  |                |                  |                |               |                 |               | MAK      |             | 0.97424     |
|  |                |                  |                |               |                 |               | ONECUT2  |             | 0.91281     |
|  |                |                  |                |               |                 |               | GNB1L    |             | 0.96262     |
|  |                |                  |                |               |                 |               | BRI3     |             | 0.93064     |
|  |                |                  |                |               |                 |               | CDT1     |             | 0.95728     |
|  |                |                  |                |               |                 |               | COMTD1   |             | 0.93800     |
|  |                |                  |                |               |                 |               | ITIH4    |             | 0.93102     |
|  |                |                  |                |               |                 |               | MXD3     |             | 0.97571     |
|  |                |                  |                |               |                 |               | NDUFV1   |             | 0.97218     |
|  |                |                  |                |               |                 |               | NUDT1    |             | 0.95001     |
|  |                |                  |                |               |                 |               | PDE1B    |             | 0.76360     |
|  |                |                  |                |               |                 |               | PLK3     |             | 0.91092     |
|  |                |                  |                |               |                 |               | POLD2    |             | 0.97079     |
|  |                |                  |                |               |                 |               | PRELID1  |             | 0.96873     |
|  |                |                  |                |               |                 |               | S100A13  |             | 0.89151     |
|  |                |                  |                |               |                 |               | THBS3    |             | 0.80787     |
|  |                |                  |                |               |                 |               | TSEN54   |             | 0.98822     |
|  |                |                  |                |               |                 |               | ZNF783   |             | 0.92310     |

|  | early_above_70 | early_aged_60_70 | early_below_55 | late_above_70 | late_aged_60_70 | late_below_55 | Probe ID | Description | Correlation |
|--|----------------|------------------|----------------|---------------|-----------------|---------------|----------|-------------|-------------|
|  |                |                  |                |               |                 |               | AMIGO2   |             | 0.96427     |
|  |                |                  |                |               |                 |               | CCNO     |             | 0.79267     |
|  |                |                  |                |               |                 |               | CD72     |             | 0.98987     |
|  |                |                  |                |               |                 |               | FAM83D   |             | 0.96214     |
|  |                |                  |                |               |                 |               | MCM6     |             | 0.93614     |
|  |                |                  |                |               |                 |               | MLXIPL   |             | 0.94897     |
|  |                |                  |                |               |                 |               | MNS1     |             | 0.96937     |
|  |                |                  |                |               |                 |               | NRXN3    |             | 0.94555     |
|  |                |                  |                |               |                 |               | SLC25A19 |             | 0.90152     |
|  |                |                  |                |               |                 |               | YWHAH    |             | 0.95100     |
|  |                |                  |                |               |                 |               | ANGPTL3  |             | 0.83321     |
|  |                |                  |                |               |                 |               | ASS1     |             | 0.94947     |
|  |                |                  |                |               |                 |               | ATP1B1   |             | 0.87638     |
|  |                |                  |                |               |                 |               | CHRD12   |             | 0.86783     |
|  |                |                  |                |               |                 |               | CPS1     |             | 0.95890     |
|  |                |                  |                |               |                 |               | DGAT2    |             | 0.97242     |
|  |                |                  |                |               |                 |               | ERP27    |             | 0.84878     |
|  |                |                  |                |               |                 |               | GNLY     |             | 0.90044     |
|  |                |                  |                |               |                 |               | METR1    |             | 0.94110     |
|  |                |                  |                |               |                 |               | MMD      |             | 0.96741     |
|  |                |                  |                |               |                 |               | NFKB1A   |             | 0.93021     |
|  |                |                  |                |               |                 |               | NGF      |             | 0.96768     |
|  |                |                  |                |               |                 |               | RAB32    |             | 0.98527     |
|  |                |                  |                |               |                 |               | RELT     |             | 0.85799     |
|  |                |                  |                |               |                 |               | STMN2    |             | 0.82744     |
|  |                |                  |                |               |                 |               | STX2     |             | 0.97773     |
|  |                |                  |                |               |                 |               | TMEM176A |             | 0.88327     |
|  |                |                  |                |               |                 |               | HES6     |             | 0.91470     |
|  |                |                  |                |               |                 |               | TLCD1    |             | 0.92215     |
|  |                |                  |                |               |                 |               | ADM      |             | 0.84645     |
|  |                |                  |                |               |                 |               | AKR1C3   |             | 0.92690     |
|  |                |                  |                |               |                 |               | IER5L    |             | 0.95778     |
|  |                |                  |                |               |                 |               | IL32     |             | 0.93950     |
|  |                |                  |                |               |                 |               | KPNA2    |             | 0.96348     |
|  |                |                  |                |               |                 |               | LCN12    |             | 0.92857     |
|  |                |                  |                |               |                 |               | LMNB2    |             | 0.96585     |
|  |                |                  |                |               |                 |               | OSCAR    |             | 0.91496     |
|  |                |                  |                |               |                 |               | SHOX2    |             | 0.82870     |
|  |                |                  |                |               |                 |               | SYK      |             | 0.96179     |
|  |                |                  |                |               |                 |               | TMEM139  |             | 0.98869     |
|  |                |                  |                |               |                 |               | ZFP36L1  |             | 0.99066     |

|  | early_above_70 | early_aged_60_70 | early_below_55 | late_above_70 | late_aged_60_70 | late_below_55 | Probe ID | Description | Correlation |
|--|----------------|------------------|----------------|---------------|-----------------|---------------|----------|-------------|-------------|
|  |                |                  |                |               |                 |               | CYP3A5   |             | 0.94622     |
|  |                |                  |                |               |                 |               | FAM81A   |             | 0.89578     |
|  |                |                  |                |               |                 |               | MGST2    |             | 0.98299     |
|  |                |                  |                |               |                 |               | MRAP2    |             | 0.95768     |
|  |                |                  |                |               |                 |               | TRIM38   |             | 0.97125     |
|  |                |                  |                |               |                 |               | ALDH1L1  |             | 0.97063     |
|  |                |                  |                |               |                 |               | AOX1     |             | 0.94512     |
|  |                |                  |                |               |                 |               | CCDC85A  |             | 0.98820     |
|  |                |                  |                |               |                 |               | CHRD     |             | 0.96741     |
|  |                |                  |                |               |                 |               | FRMD6    |             | 0.93991     |
|  |                |                  |                |               |                 |               | GNAO1    |             | 0.98966     |
|  |                |                  |                |               |                 |               | NOS1     |             | 0.96413     |
|  |                |                  |                |               |                 |               | ZDHHC15  |             | 0.94510     |
|  |                |                  |                |               |                 |               | PRICKLE2 |             | 0.98924     |
|  |                |                  |                |               |                 |               | SNAI2    |             | 0.98351     |
|  |                |                  |                |               |                 |               | PLEKHG4B |             | 0.95276     |
|  |                |                  |                |               |                 |               | SPON1    |             | 0.87851     |
|  |                |                  |                |               |                 |               | MOGS     |             | 0.99043     |
|  |                |                  |                |               |                 |               | PNKP     |             | 0.96089     |
|  |                |                  |                |               |                 |               | TRIM13   |             | 0.98689     |



|  | early_above_70 | early_aged_60_70 | early_below_55 | late_above_70 | late_aged_60_70 | late_below_55 | Probe ID | Description | Correlation |
|--|----------------|------------------|----------------|---------------|-----------------|---------------|----------|-------------|-------------|
|  |                |                  |                |               |                 |               | LPIN2    |             | 0.98131     |
|  |                |                  |                |               |                 |               | PRDM4    |             | 0.97227     |
|  |                |                  |                |               |                 |               | RABGEF1  |             | 0.97493     |
|  |                |                  |                |               |                 |               | TRIM24   |             | 0.96699     |
|  |                |                  |                |               |                 |               | GART     |             | 0.99788     |
|  |                |                  |                |               |                 |               | GREB1L   |             | 0.97957     |
|  |                |                  |                |               |                 |               | ME2      |             | 0.97663     |
|  |                |                  |                |               |                 |               | MED13L   |             | 0.89223     |
|  |                |                  |                |               |                 |               | RECK     |             | 0.92039     |
|  |                |                  |                |               |                 |               | TFAM     |             | 0.94277     |
|  |                |                  |                |               |                 |               | WWP1     |             | 0.99597     |
|  |                |                  |                |               |                 |               | DTX3L    |             | 0.98168     |
|  |                |                  |                |               |                 |               | LCLAT1   |             | 0.98452     |
|  |                |                  |                |               |                 |               | METTL2B  |             | 0.99533     |
|  |                |                  |                |               |                 |               | NEU3     |             | 0.98567     |
|  |                |                  |                |               |                 |               | PLEKHA7  |             | 0.96868     |
|  |                |                  |                |               |                 |               | STK38L   |             | 0.94139     |
|  |                |                  |                |               |                 |               | ZNF445   |             | 0.98378     |

|  | early_above_70 | early_aged_60_70 | early_below_55 | late_above_70 | late_aged_60_70 | late_below_55 | Probe ID | Description | Correlation |
|--|----------------|------------------|----------------|---------------|-----------------|---------------|----------|-------------|-------------|
|  |                |                  |                |               |                 |               | NAPA     |             | 0.98972     |
|  |                |                  |                |               |                 |               | VWDE     |             | 0.95486     |
|  |                |                  |                |               |                 |               | DNAJC12  |             | 0.94417     |
|  |                |                  |                |               |                 |               | TMEM189  |             | 0.95815     |
|  |                |                  |                |               |                 |               | ECH1     |             | 0.98912     |

|  | early_above_70 | early_aged_60_70 | early_below_55 | late_above_70 | late_aged_60_70 | late_below_55 | Probe ID | Description | Correlation |
|--|----------------|------------------|----------------|---------------|-----------------|---------------|----------|-------------|-------------|
|  |                |                  |                |               |                 |               | CABIN1   |             | 0.98486     |
|  |                |                  |                |               |                 |               | CNN2     |             | 0.86977     |
|  |                |                  |                |               |                 |               | LTBP4    |             | 0.78221     |
|  |                |                  |                |               |                 |               | MEGF8    |             | 0.98191     |
|  |                |                  |                |               |                 |               | PID1     |             | 0.97176     |
|  |                |                  |                |               |                 |               | PRAM1    |             | 0.79198     |
|  |                |                  |                |               |                 |               | STRADB   |             | 0.97129     |
|  |                |                  |                |               |                 |               | SYT1     |             | 0.86343     |
|  |                |                  |                |               |                 |               | MYO9B    |             | 0.98621     |
|  |                |                  |                |               |                 |               | CHODL    |             | 0.93166     |
|  |                |                  |                |               |                 |               | CTNS     |             | 0.91796     |
|  |                |                  |                |               |                 |               | CYP2J2   |             | 0.88728     |
|  |                |                  |                |               |                 |               | DISP2    |             | 0.94395     |
|  |                |                  |                |               |                 |               | NCDN     |             | 0.95088     |
|  |                |                  |                |               |                 |               | RPS6KA2  |             | 0.92911     |
|  |                |                  |                |               |                 |               | TMEM86A  |             | 0.96889     |
|  |                |                  |                |               |                 |               | PTP4A3   |             | 0.96548     |
|  |                |                  |                |               |                 |               | ARHGAP1  |             | 0.89931     |
|  |                |                  |                |               |                 |               | ATG9A    |             | 0.97560     |
|  |                |                  |                |               |                 |               | BCL6     |             | 0.94468     |
|  |                |                  |                |               |                 |               | CTC1     |             | 0.98140     |
|  |                |                  |                |               |                 |               | CUL9     |             | 0.99005     |
|  |                |                  |                |               |                 |               | GALNT10  |             | 0.97513     |
|  |                |                  |                |               |                 |               | GOLGA3   |             | 0.99571     |
|  |                |                  |                |               |                 |               | NSMCE1   |             | 0.83163     |
|  |                |                  |                |               |                 |               | ORAI3    |             | 0.92875     |
|  |                |                  |                |               |                 |               | PLEKHG5  |             | 0.88591     |
|  |                |                  |                |               |                 |               | PNPLA2   |             | 0.97988     |
|  |                |                  |                |               |                 |               | POU2F2   |             | 0.90816     |
|  |                |                  |                |               |                 |               | TBC1D16  |             | 0.93586     |
|  |                |                  |                |               |                 |               | ZDHHC14  |             | 0.98353     |
|  |                |                  |                |               |                 |               | ZNF324   |             | 0.92569     |

|  | early_above_70 | early_aged_60_70 | early_below_55 | late_above_70 | late_aged_60_70 | late_below_55 | Probe ID | Description | Correlation |
|--|----------------|------------------|----------------|---------------|-----------------|---------------|----------|-------------|-------------|
|  |                |                  |                |               |                 |               | AP3M2    |             | 0.97715     |
|  |                |                  |                |               |                 |               | AZIN1    |             | 0.93827     |
|  |                |                  |                |               |                 |               | BRAF     |             | 0.96997     |
|  |                |                  |                |               |                 |               | ECT2     |             | 0.89824     |
|  |                |                  |                |               |                 |               | EFCAB11  |             | 0.85216     |
|  |                |                  |                |               |                 |               | HILPDA   |             | 0.92439     |
|  |                |                  |                |               |                 |               | ISCA1    |             | 0.97817     |
|  |                |                  |                |               |                 |               | PAK1     |             | 0.78182     |
|  |                |                  |                |               |                 |               | PRLR     |             | 0.95025     |
|  |                |                  |                |               |                 |               | RAD23B   |             | 0.94103     |
|  |                |                  |                |               |                 |               | ZWILCH   |             | 0.98001     |
|  |                |                  |                |               |                 |               | MAD2L1   |             | 0.96148     |
|  |                |                  |                |               |                 |               | TMEM70   |             | 0.97081     |
|  |                |                  |                |               |                 |               | AGTPBP1  |             | 0.97982     |
|  |                |                  |                |               |                 |               | BAG4     |             | 0.93688     |
|  |                |                  |                |               |                 |               | DNAH11   |             | 0.85404     |
|  |                |                  |                |               |                 |               | GAS2     |             | 0.87505     |
|  |                |                  |                |               |                 |               | MAPK9    |             | 0.99617     |
|  |                |                  |                |               |                 |               | PTPRR    |             | 0.91391     |
|  |                |                  |                |               |                 |               | RASSF3   |             | 0.98143     |
|  |                |                  |                |               |                 |               | SDCBP    |             | 0.97702     |
|  |                |                  |                |               |                 |               | WASF1    |             | 0.96403     |
|  |                |                  |                |               |                 |               | CMBL     |             | 0.91998     |
|  |                |                  |                |               |                 |               | DAPK1    |             | 0.88220     |
|  |                |                  |                |               |                 |               | GLO1     |             | 0.93914     |
|  |                |                  |                |               |                 |               | MRPL50   |             | 0.91266     |
|  |                |                  |                |               |                 |               | RRM1     |             | 0.95538     |
|  |                |                  |                |               |                 |               | SLBP     |             | 0.93330     |
|  |                |                  |                |               |                 |               | TPGS2    |             | 0.92805     |
|  |                |                  |                |               |                 |               | ZNF273   |             | 0.98691     |

|  | early_above_70 | early_aged_60_70 | early_below_55 | late_above_70 | late_aged_60_70 | late_below_55 | Probe ID | Descripti... | Correlation |
|--|----------------|------------------|----------------|---------------|-----------------|---------------|----------|--------------|-------------|
|  |                |                  |                |               |                 |               | ARF5     |              | 0.98535     |
|  |                |                  |                |               |                 |               | ASNS     |              | 0.99274     |
|  |                |                  |                |               |                 |               | CDC45    |              | 0.99499     |
|  |                |                  |                |               |                 |               | CDK4     |              | 0.98749     |
|  |                |                  |                |               |                 |               | CHCHD3   |              | 0.97161     |
|  |                |                  |                |               |                 |               | DBF4     |              | 0.98655     |
|  |                |                  |                |               |                 |               | DMTF1    |              | 0.94337     |
|  |                |                  |                |               |                 |               | DNAJB6   |              | 0.98079     |
|  |                |                  |                |               |                 |               | DYNLL1   |              | 0.99014     |
|  |                |                  |                |               |                 |               | EIF3H    |              | 0.98998     |
|  |                |                  |                |               |                 |               | ENSA     |              | 0.90723     |
|  |                |                  |                |               |                 |               | EYA2     |              | 0.97245     |
|  |                |                  |                |               |                 |               | FANCC    |              | 0.96221     |
|  |                |                  |                |               |                 |               | FIGNL1   |              | 0.97160     |
|  |                |                  |                |               |                 |               | FUS      |              | 0.94228     |
|  |                |                  |                |               |                 |               | HCFC1R1  |              | 0.95280     |
|  |                |                  |                |               |                 |               | HTRA2    |              | 0.96477     |
|  |                |                  |                |               |                 |               | KIF18A   |              | 0.95089     |
|  |                |                  |                |               |                 |               | LMNB1    |              | 0.95682     |
|  |                |                  |                |               |                 |               | LSM5     |              | 0.96204     |
|  |                |                  |                |               |                 |               | MRPS33   |              | 0.96582     |
|  |                |                  |                |               |                 |               | MRRF     |              | 0.99231     |
|  |                |                  |                |               |                 |               | NR1D1    |              | 0.94505     |
|  |                |                  |                |               |                 |               | NRM      |              | 0.95735     |
|  |                |                  |                |               |                 |               | NSMCE2   |              | 0.95673     |
|  |                |                  |                |               |                 |               | PCGF1    |              | 0.90549     |
|  |                |                  |                |               |                 |               | PLCH1    |              | 0.98760     |
|  |                |                  |                |               |                 |               | PPARG    |              | 0.99015     |
|  |                |                  |                |               |                 |               | RALA     |              | 0.97872     |
|  |                |                  |                |               |                 |               | RALY     |              | 0.98494     |
|  |                |                  |                |               |                 |               | RANBP1   |              | 0.97716     |
|  |                |                  |                |               |                 |               | RGS9     |              | 0.92051     |
|  |                |                  |                |               |                 |               | RHPN1    |              | 0.88339     |
|  |                |                  |                |               |                 |               | RNFT2    |              | 0.94972     |
|  |                |                  |                |               |                 |               | SSBP1    |              | 0.96979     |
|  |                |                  |                |               |                 |               | TBRG4    |              | 0.95579     |
|  |                |                  |                |               |                 |               | TCF3     |              | 0.92535     |
|  |                |                  |                |               |                 |               | TFAP4    |              | 0.96709     |
|  |                |                  |                |               |                 |               | TMSB10   |              | 0.98607     |
|  |                |                  |                |               |                 |               | UBE2I    |              | 0.96055     |
|  |                |                  |                |               |                 |               | UBE2S    |              | 0.95777     |
|  |                |                  |                |               |                 |               | UQCRCB   |              | 0.99094     |
|  |                |                  |                |               |                 |               | BANF1    |              | 0.94007     |
|  |                |                  |                |               |                 |               | DDX39A   |              | 0.99303     |
|  |                |                  |                |               |                 |               | POLD1    |              | 0.97798     |
|  |                |                  |                |               |                 |               | YBX1     |              | 0.99101     |
|  |                |                  |                |               |                 |               | HNRNPAB  |              | 0.98080     |
|  |                |                  |                |               |                 |               | REXO4    |              | 0.99733     |
|  |                |                  |                |               |                 |               | RNPS1    |              | 0.97138     |
|  |                |                  |                |               |                 |               | PPP2R3B  |              | 0.88015     |
|  |                |                  |                |               |                 |               | ANP32B   |              | 0.97587     |
|  |                |                  |                |               |                 |               | BATF     |              | 0.95477     |
|  |                |                  |                |               |                 |               | BOD1     |              | 0.98750     |
|  |                |                  |                |               |                 |               | CCDC34   |              | 0.98636     |
|  |                |                  |                |               |                 |               | CDCA3    |              | 0.96609     |
|  |                |                  |                |               |                 |               | CENPK    |              | 0.99344     |
|  |                |                  |                |               |                 |               | GPC3     |              | 0.92842     |
|  |                |                  |                |               |                 |               | LEF1     |              | 0.99086     |
|  |                |                  |                |               |                 |               | LRRC61   |              | 0.94369     |
|  |                |                  |                |               |                 |               | MAD2L2   |              | 0.96122     |
|  |                |                  |                |               |                 |               | MND1     |              | 0.95907     |
|  |                |                  |                |               |                 |               | ODF2L    |              | 0.98522     |
|  |                |                  |                |               |                 |               | PKMYT1   |              | 0.94721     |
|  |                |                  |                |               |                 |               | POLA2    |              | 0.99037     |
|  |                |                  |                |               |                 |               | POLQ     |              | 0.97071     |
|  |                |                  |                |               |                 |               | RFC2     |              | 0.94930     |
|  |                |                  |                |               |                 |               | RPL26L1  |              | 0.98892     |
|  |                |                  |                |               |                 |               | RPL30    |              | 0.97493     |
|  |                |                  |                |               |                 |               | SAMD1    |              | 0.92654     |
|  |                |                  |                |               |                 |               | SPDYE1   |              | 0.95008     |
|  |                |                  |                |               |                 |               | STMN1    |              | 0.95004     |
|  |                |                  |                |               |                 |               | TBX19    |              | 0.91918     |
|  |                |                  |                |               |                 |               | TLE6     |              | 0.95781     |
|  |                |                  |                |               |                 |               | TRIP13   |              | 0.93523     |
|  |                |                  |                |               |                 |               | UBE2T    |              | 0.96965     |
|  |                |                  |                |               |                 |               | ZNF706   |              | 0.93913     |
|  |                |                  |                |               |                 |               | ZNF768   |              | 0.92147     |
|  |                |                  |                |               |                 |               | DDIT3    |              | 0.98910     |
|  |                |                  |                |               |                 |               | GFER     |              | 0.97618     |
|  |                |                  |                |               |                 |               | TMSB4X   |              | 0.98022     |
|  |                |                  |                |               |                 |               | MELK     |              | 0.96913     |
|  |                |                  |                |               |                 |               | ADCK5    |              | 0.98800     |
|  |                |                  |                |               |                 |               | ASF1B    |              | 0.97328     |
|  |                |                  |                |               |                 |               | C21orf58 |              | 0.96916     |
|  |                |                  |                |               |                 |               | CACNB3   |              | 0.96591     |
|  |                |                  |                |               |                 |               | CCDC58   |              | 0.96021     |
|  |                |                  |                |               |                 |               | CCNF     |              | 0.93436     |
|  |                |                  |                |               |                 |               | CDK1     |              | 0.96982     |
|  |                |                  |                |               |                 |               | CRIP1    |              | 0.89676     |
|  |                |                  |                |               |                 |               | DDX49    |              | 0.94650     |
|  |                |                  |                |               |                 |               | DNAJC9   |              | 0.97637     |
|  |                |                  |                |               |                 |               | FAM89B   |              | 0.98405     |
|  |                |                  |                |               |                 |               | GNG3     |              | 0.97580     |
|  |                |                  |                |               |                 |               | GTF2H4   |              | 0.98557     |
|  |                |                  |                |               |                 |               | HIAU58   |              | 0.98759     |
|  |                |                  |                |               |                 |               | HMGCB2   |              | 0.94452     |
|  |                |                  |                |               |                 |               | ITGB1BP1 |              | 0.95716     |
|  |                |                  |                |               |                 |               | KIFC2    |              | 0.96227     |
|  |                |                  |                |               |                 |               | LINGO1   |              | 0.96798     |
|  |                |                  |                |               |                 |               | MRPL48   |              | 0.95717     |
|  |                |                  |                |               |                 |               | NASP     |              | 0.99004     |
|  |                |                  |                |               |                 |               | PCNA     |              | 0.96005     |
|  |                |                  |                |               |                 |               | PCSK4    |              | 0.96997     |
|  |                |                  |                |               |                 |               | PFDN6    |              | 0.88238     |
|  |                |                  |                |               |                 |               | PIF1     |              | 0.96504     |
|  |                |                  |                |               |                 |               | RCC1     |              | 0.97399     |
|  |                |                  |                |               |                 |               | RNA5H2A  |              | 0.98305     |
|  |                |                  |                |               |                 |               | SDC1     |              | 0.94152     |

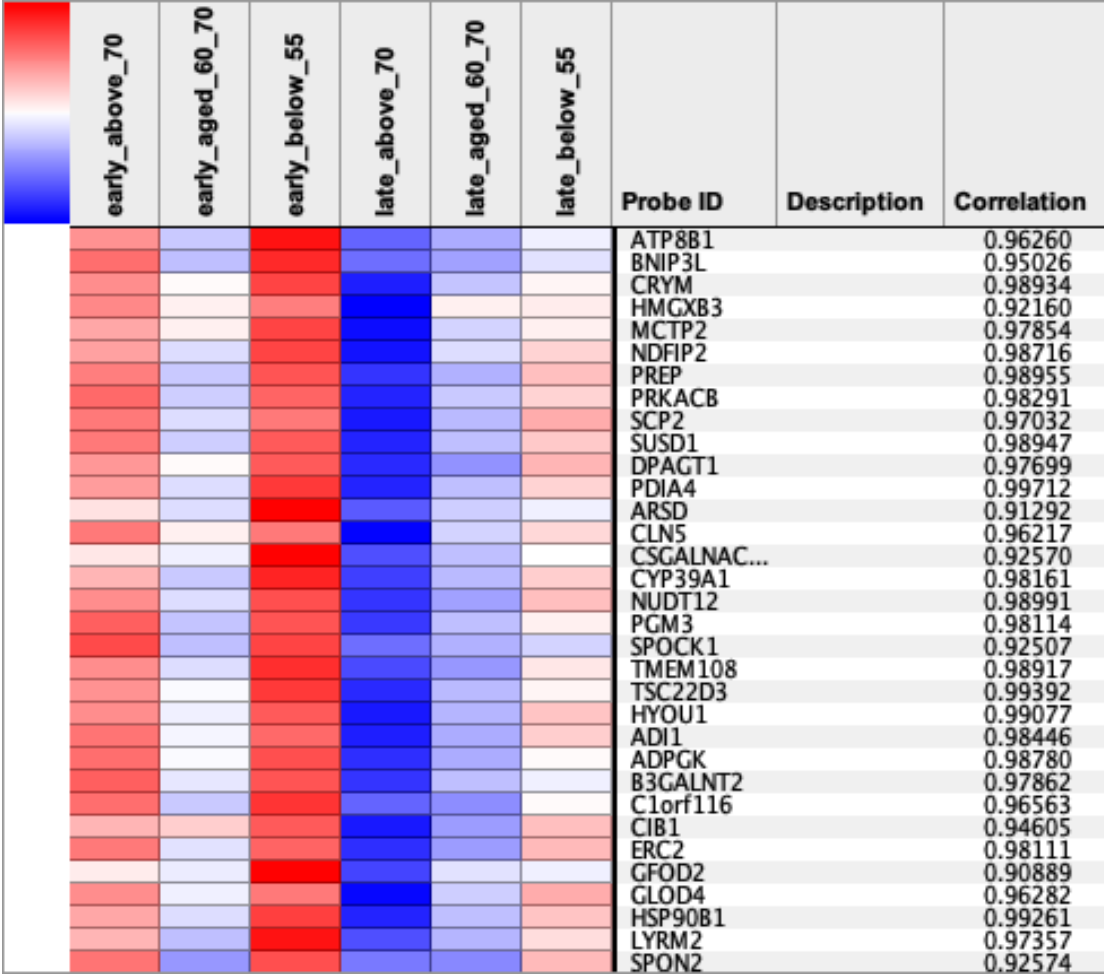

|  | early_above_70 | early_aged_60_70 | early_below_55 | late_above_70 | late_aged_60_70 | late_below_55 | Probe ID    | Description | Correlation |
|--|----------------|------------------|----------------|---------------|-----------------|---------------|-------------|-------------|-------------|
|  |                |                  |                |               |                 |               | ATP8B1      |             | 0.96260     |
|  |                |                  |                |               |                 |               | BNIP3L      |             | 0.95026     |
|  |                |                  |                |               |                 |               | CRYM        |             | 0.98934     |
|  |                |                  |                |               |                 |               | HMGXB3      |             | 0.92160     |
|  |                |                  |                |               |                 |               | MCTP2       |             | 0.97854     |
|  |                |                  |                |               |                 |               | NDFIP2      |             | 0.98716     |
|  |                |                  |                |               |                 |               | PREP        |             | 0.98955     |
|  |                |                  |                |               |                 |               | PRKACB      |             | 0.98291     |
|  |                |                  |                |               |                 |               | SCP2        |             | 0.97032     |
|  |                |                  |                |               |                 |               | SUSD1       |             | 0.98947     |
|  |                |                  |                |               |                 |               | DPAGT1      |             | 0.97699     |
|  |                |                  |                |               |                 |               | PDIA4       |             | 0.99712     |
|  |                |                  |                |               |                 |               | ARSD        |             | 0.91292     |
|  |                |                  |                |               |                 |               | CLN5        |             | 0.96217     |
|  |                |                  |                |               |                 |               | CSGALNAC... |             | 0.92570     |
|  |                |                  |                |               |                 |               | CYP39A1     |             | 0.98161     |
|  |                |                  |                |               |                 |               | NUDT12      |             | 0.98991     |
|  |                |                  |                |               |                 |               | PGM3        |             | 0.98114     |
|  |                |                  |                |               |                 |               | SPOCK1      |             | 0.92507     |
|  |                |                  |                |               |                 |               | TMEM108     |             | 0.98917     |
|  |                |                  |                |               |                 |               | TSC22D3     |             | 0.99392     |
|  |                |                  |                |               |                 |               | HYOU1       |             | 0.99077     |
|  |                |                  |                |               |                 |               | ADI1        |             | 0.98446     |
|  |                |                  |                |               |                 |               | ADPGK       |             | 0.98780     |
|  |                |                  |                |               |                 |               | B3GALNT2    |             | 0.97862     |
|  |                |                  |                |               |                 |               | C1orf116    |             | 0.96563     |
|  |                |                  |                |               |                 |               | CIB1        |             | 0.94605     |
|  |                |                  |                |               |                 |               | ERC2        |             | 0.98111     |
|  |                |                  |                |               |                 |               | GFOD2       |             | 0.90889     |
|  |                |                  |                |               |                 |               | GLD4        |             | 0.96282     |
|  |                |                  |                |               |                 |               | HSP90B1     |             | 0.99261     |
|  |                |                  |                |               |                 |               | LYRM2       |             | 0.97357     |
|  |                |                  |                |               |                 |               | SPON2       |             | 0.92574     |

|  | early_above_70 | early_aged_60_70 | early_below_55 | late_above_70 | late_aged_60_70 | late_below_55 | Probe ID | Descripti... | Correlation |
|--|----------------|------------------|----------------|---------------|-----------------|---------------|----------|--------------|-------------|
|  |                |                  |                |               |                 |               | CCDC114  |              | 0.97186     |
|  |                |                  |                |               |                 |               | CMTM7    |              | 0.98286     |
|  |                |                  |                |               |                 |               | ENO3     |              | 0.90644     |
|  |                |                  |                |               |                 |               | GATA6    |              | 0.93731     |
|  |                |                  |                |               |                 |               | ID2      |              | 0.90756     |
|  |                |                  |                |               |                 |               | KLF5     |              | 0.91528     |
|  |                |                  |                |               |                 |               | RAI14    |              | 0.89728     |
|  |                |                  |                |               |                 |               | SRI      |              | 0.98604     |
|  |                |                  |                |               |                 |               | CKS1B    |              | 0.91880     |
|  |                |                  |                |               |                 |               | RSPH9    |              | 0.97336     |
|  |                |                  |                |               |                 |               | AKR1C2   |              | 0.96688     |
|  |                |                  |                |               |                 |               | ARHGAP15 |              | 0.91474     |
|  |                |                  |                |               |                 |               | CHAC2    |              | 0.95133     |
|  |                |                  |                |               |                 |               | CHL1     |              | 0.80779     |
|  |                |                  |                |               |                 |               | LAMB1    |              | 0.94092     |
|  |                |                  |                |               |                 |               | LRRC43   |              | 0.90204     |
|  |                |                  |                |               |                 |               | LRRC4C   |              | 0.93434     |
|  |                |                  |                |               |                 |               | NVL      |              | 0.90127     |
|  |                |                  |                |               |                 |               | PACSIN1  |              | 0.91876     |
|  |                |                  |                |               |                 |               | RHEB     |              | 0.89533     |
|  |                |                  |                |               |                 |               | RNF130   |              | 0.90863     |
|  |                |                  |                |               |                 |               | SLC25A39 |              | 0.91486     |
|  |                |                  |                |               |                 |               | SPAG4    |              | 0.91357     |
|  |                |                  |                |               |                 |               | ZNF787   |              | 0.94831     |
|  |                |                  |                |               |                 |               | CNIH4    |              | 0.97185     |
|  |                |                  |                |               |                 |               | CKS2     |              | 0.88419     |
|  |                |                  |                |               |                 |               | AKR1C1   |              | 0.94178     |
|  |                |                  |                |               |                 |               | ARPC5L   |              | 0.98801     |
|  |                |                  |                |               |                 |               | ARRDC1   |              | 0.93603     |
|  |                |                  |                |               |                 |               | CCNE1    |              | 0.97202     |
|  |                |                  |                |               |                 |               | CDC26    |              | 0.95087     |
|  |                |                  |                |               |                 |               | CHEK2    |              | 0.87225     |
|  |                |                  |                |               |                 |               | FASTK    |              | 0.89685     |
|  |                |                  |                |               |                 |               | IQCD     |              | 0.99680     |
|  |                |                  |                |               |                 |               | IRF2BP2  |              | 0.94857     |
|  |                |                  |                |               |                 |               | LRR1     |              | 0.98945     |
|  |                |                  |                |               |                 |               | PLEKHH3  |              | 0.92272     |
|  |                |                  |                |               |                 |               | RAC1     |              | 0.97267     |
|  |                |                  |                |               |                 |               | SEMA3B   |              | 0.91237     |
|  |                |                  |                |               |                 |               | SKA2     |              | 0.94355     |
|  |                |                  |                |               |                 |               | SLC2A8   |              | 0.98719     |
|  |                |                  |                |               |                 |               | TMEM203  |              | 0.94131     |
|  |                |                  |                |               |                 |               | TMUB1    |              | 0.93119     |
|  |                |                  |                |               |                 |               | TOMM40L  |              | 0.91455     |
|  |                |                  |                |               |                 |               | URM1     |              | 0.94371     |
|  |                |                  |                |               |                 |               | ZP3      |              | 0.92603     |

|  | early_above_70 | early_aged_60_70 | early_below_55 | late_above_70 | late_aged_60_70 | late_below_55 | Probe ID | Description | Correlation |
|--|----------------|------------------|----------------|---------------|-----------------|---------------|----------|-------------|-------------|
|  |                |                  |                |               |                 |               | APC      |             | 0.94381     |
|  |                |                  |                |               |                 |               | FER      |             | 0.97836     |
|  |                |                  |                |               |                 |               | GALNT3   |             | 0.97340     |
|  |                |                  |                |               |                 |               | GPN3     |             | 0.93562     |
|  |                |                  |                |               |                 |               | GTF2H3   |             | 0.95334     |
|  |                |                  |                |               |                 |               | RAB3GAP1 |             | 0.97007     |
|  |                |                  |                |               |                 |               | SHBG     |             | 0.84863     |
|  |                |                  |                |               |                 |               | ZRANB3   |             | 0.95050     |
|  |                |                  |                |               |                 |               | TMED4    |             | 0.96661     |
|  |                |                  |                |               |                 |               | BMPRI1A  |             | 0.98714     |
|  |                |                  |                |               |                 |               | DNAJC25  |             | 0.93645     |
|  |                |                  |                |               |                 |               | EPC2     |             | 0.97588     |
|  |                |                  |                |               |                 |               | FRRS1    |             | 0.97411     |
|  |                |                  |                |               |                 |               | GGH      |             | 0.80278     |
|  |                |                  |                |               |                 |               | MMS22L   |             | 0.96660     |
|  |                |                  |                |               |                 |               | NPEPPS   |             | 0.98348     |
|  |                |                  |                |               |                 |               | LCOR     |             | 0.95950     |
|  |                |                  |                |               |                 |               | TOB1     |             | 0.63086     |
|  |                |                  |                |               |                 |               | ACAA2    |             | 0.95644     |
|  |                |                  |                |               |                 |               | C9orf64  |             | 0.89736     |
|  |                |                  |                |               |                 |               | FBXL13   |             | 0.96761     |
|  |                |                  |                |               |                 |               | SLC35E3  |             | 0.95455     |
|  |                |                  |                |               |                 |               | SNX4     |             | 0.98910     |
|  |                |                  |                |               |                 |               | SPTY2D1  |             | 0.98084     |

|  | early_above_70 | early_aged_60_70 | early_below_55 | late_above_70 | late_aged_60_70 | late_below_55 | Probe ID | Description | Correlation |
|--|----------------|------------------|----------------|---------------|-----------------|---------------|----------|-------------|-------------|
|  |                |                  |                |               |                 |               | ITGB8    |             | 0.93284     |
|  |                |                  |                |               |                 |               | SORCS1   |             | 0.94862     |
|  |                |                  |                |               |                 |               | TDP2     |             | 0.96198     |
|  |                |                  |                |               |                 |               | KBTBD6   |             | 0.94552     |
|  |                |                  |                |               |                 |               | ARSJ     |             | 0.90903     |
|  |                |                  |                |               |                 |               | ATRNL1   |             | 0.92746     |
|  |                |                  |                |               |                 |               | GPM6B    |             | 0.97925     |
|  |                |                  |                |               |                 |               | HCN4     |             | 0.89902     |
|  |                |                  |                |               |                 |               | SH3TC1   |             | 0.96406     |
|  |                |                  |                |               |                 |               | SMARCA1  |             | 0.97004     |
|  |                |                  |                |               |                 |               | SUSD4    |             | 0.92518     |
|  |                |                  |                |               |                 |               | ACYP2    |             | 0.86040     |

|  | early_above_70 | early_aged_60_70 | early_below_55 | late_above_70 | late_aged_60_70 | late_below_55 | Probe ID  | Descripti... | Correlation |
|--|----------------|------------------|----------------|---------------|-----------------|---------------|-----------|--------------|-------------|
|  |                |                  |                |               |                 |               | AHI1      |              | 0.94470     |
|  |                |                  |                |               |                 |               | FAM120B   |              | 0.98302     |
|  |                |                  |                |               |                 |               | FBXO32    |              | 0.86089     |
|  |                |                  |                |               |                 |               | GALNT7    |              | 0.84892     |
|  |                |                  |                |               |                 |               | KAT6B     |              | 0.99180     |
|  |                |                  |                |               |                 |               | LIPT1     |              | 0.95322     |
|  |                |                  |                |               |                 |               | METTL8    |              | 0.95808     |
|  |                |                  |                |               |                 |               | N4BP2     |              | 0.96695     |
|  |                |                  |                |               |                 |               | POLR3B    |              | 0.91746     |
|  |                |                  |                |               |                 |               | PTPRJ     |              | 0.96911     |
|  |                |                  |                |               |                 |               | SIPA1L3   |              | 0.93607     |
|  |                |                  |                |               |                 |               | TESK2     |              | 0.92503     |
|  |                |                  |                |               |                 |               | TRIM2     |              | 0.90138     |
|  |                |                  |                |               |                 |               | VCL       |              | 0.98184     |
|  |                |                  |                |               |                 |               | VP554     |              | 0.89119     |
|  |                |                  |                |               |                 |               | WDR35     |              | 0.97492     |
|  |                |                  |                |               |                 |               | ZBTB1     |              | 0.97213     |
|  |                |                  |                |               |                 |               | ZKSCAN2   |              | 0.95558     |
|  |                |                  |                |               |                 |               | C6orf52   |              | 0.89742     |
|  |                |                  |                |               |                 |               | ZNF778    |              | 0.91244     |
|  |                |                  |                |               |                 |               | ANTXR2    |              | 0.94888     |
|  |                |                  |                |               |                 |               | HLCS      |              | 0.96736     |
|  |                |                  |                |               |                 |               | MAML3     |              | 0.92333     |
|  |                |                  |                |               |                 |               | ABI2      |              | 0.98817     |
|  |                |                  |                |               |                 |               | BICD1     |              | 0.96300     |
|  |                |                  |                |               |                 |               | CGRRF1    |              | 0.98838     |
|  |                |                  |                |               |                 |               | DSP       |              | 0.96609     |
|  |                |                  |                |               |                 |               | EDEM3     |              | 0.87908     |
|  |                |                  |                |               |                 |               | ILDR1     |              | 0.94465     |
|  |                |                  |                |               |                 |               | ITGA9     |              | 0.97002     |
|  |                |                  |                |               |                 |               | KIF13A    |              | 0.95893     |
|  |                |                  |                |               |                 |               | MPDZ      |              | 0.97980     |
|  |                |                  |                |               |                 |               | PHACTR2   |              | 0.95407     |
|  |                |                  |                |               |                 |               | PIK3C3    |              | 0.98693     |
|  |                |                  |                |               |                 |               | PPP1R13B  |              | 0.98307     |
|  |                |                  |                |               |                 |               | PRSS23    |              | 0.91088     |
|  |                |                  |                |               |                 |               | RAB11FIP2 |              | 0.99101     |
|  |                |                  |                |               |                 |               | RASSF8    |              | 0.92044     |
|  |                |                  |                |               |                 |               | RNF13     |              | 0.97166     |
|  |                |                  |                |               |                 |               | SPECC1L   |              | 0.98538     |
|  |                |                  |                |               |                 |               | TTC17     |              | 0.95772     |
|  |                |                  |                |               |                 |               | ZNF331    |              | 0.93958     |
|  |                |                  |                |               |                 |               | COLEC12   |              | 0.98335     |
|  |                |                  |                |               |                 |               | SLC36A4   |              | 0.95709     |
|  |                |                  |                |               |                 |               | BTRC      |              | 0.98955     |
|  |                |                  |                |               |                 |               | DNAJC28   |              | 0.91706     |
|  |                |                  |                |               |                 |               | ELK4      |              | 0.94426     |
|  |                |                  |                |               |                 |               | GIGYF2    |              | 0.97893     |
|  |                |                  |                |               |                 |               | HSH2D     |              | 0.94440     |
|  |                |                  |                |               |                 |               | LEO1      |              | 0.99909     |
|  |                |                  |                |               |                 |               | PGBD4     |              | 0.97606     |
|  |                |                  |                |               |                 |               | PIGN      |              | 0.93801     |
|  |                |                  |                |               |                 |               | RAVER2    |              | 0.95003     |
|  |                |                  |                |               |                 |               | ROR1      |              | 0.94953     |
|  |                |                  |                |               |                 |               | SGMS1     |              | 0.99222     |
|  |                |                  |                |               |                 |               | STK32C    |              | 0.94976     |
|  |                |                  |                |               |                 |               | WIP1      |              | 0.97755     |
|  |                |                  |                |               |                 |               | ZSCAN30   |              | 0.99019     |
|  |                |                  |                |               |                 |               | ZSWIM5    |              | 0.97417     |



|  | early_above_70 | early_aged_60_70 | early_below_55 | late_above_70 | late_aged_60_70 | late_below_55 | Probe ID | Descripti... | Correlation |
|--|----------------|------------------|----------------|---------------|-----------------|---------------|----------|--------------|-------------|
|  |                |                  |                |               |                 |               | ARHGAP26 |              | 0.95913     |
|  |                |                  |                |               |                 |               | BCAN     |              | 0.54367     |
|  |                |                  |                |               |                 |               | CA11     |              | 0.97300     |
|  |                |                  |                |               |                 |               | CELSR1   |              | 0.97050     |
|  |                |                  |                |               |                 |               | CFTR     |              | 0.70504     |
|  |                |                  |                |               |                 |               | CHI3L2   |              | 0.93900     |
|  |                |                  |                |               |                 |               | CREB3    |              | 0.93782     |
|  |                |                  |                |               |                 |               | CREB3L1  |              | 0.94091     |
|  |                |                  |                |               |                 |               | CYP20A1  |              | 0.98480     |
|  |                |                  |                |               |                 |               | DHRS7B   |              | 0.97752     |
|  |                |                  |                |               |                 |               | DUSP1    |              | 0.99498     |
|  |                |                  |                |               |                 |               | EML2     |              | 0.95197     |
|  |                |                  |                |               |                 |               | ETV6     |              | 0.83719     |
|  |                |                  |                |               |                 |               | HM13     |              | 0.98225     |
|  |                |                  |                |               |                 |               | ITM2C    |              | 0.91331     |
|  |                |                  |                |               |                 |               | KCNK6    |              | 0.96509     |
|  |                |                  |                |               |                 |               | LHPP     |              | 0.96397     |
|  |                |                  |                |               |                 |               | NR4A3    |              | 0.93953     |
|  |                |                  |                |               |                 |               | PDGFC    |              | 0.93283     |
|  |                |                  |                |               |                 |               | PER2     |              | 0.98489     |
|  |                |                  |                |               |                 |               | PIEZO1   |              | 0.95704     |
|  |                |                  |                |               |                 |               | PITPNC1  |              | 0.97807     |
|  |                |                  |                |               |                 |               | PLA2G15  |              | 0.97423     |
|  |                |                  |                |               |                 |               | RHOB     |              | 0.89130     |
|  |                |                  |                |               |                 |               | RTN2     |              | 0.97165     |
|  |                |                  |                |               |                 |               | SIL1     |              | 0.97602     |
|  |                |                  |                |               |                 |               | SUMF2    |              | 0.98999     |
|  |                |                  |                |               |                 |               | TRPM4    |              | 0.98678     |
|  |                |                  |                |               |                 |               | VPS53    |              | 0.95552     |
|  |                |                  |                |               |                 |               | SEC61A1  |              | 0.96312     |
|  |                |                  |                |               |                 |               | ABCA8    |              | 0.96708     |
|  |                |                  |                |               |                 |               | ACP5     |              | 0.95968     |
|  |                |                  |                |               |                 |               | BCAR1    |              | 0.99095     |
|  |                |                  |                |               |                 |               | DHRS7    |              | 0.91282     |
|  |                |                  |                |               |                 |               | ERP29    |              | 0.96774     |
|  |                |                  |                |               |                 |               | FBN3     |              | 0.81701     |
|  |                |                  |                |               |                 |               | FST      |              | 0.48135     |
|  |                |                  |                |               |                 |               | GLRB     |              | 0.75200     |
|  |                |                  |                |               |                 |               | GMPPA    |              | 0.98541     |
|  |                |                  |                |               |                 |               | CSS      |              | 0.95809     |
|  |                |                  |                |               |                 |               | HDC      |              | 0.81489     |
|  |                |                  |                |               |                 |               | INPP4B   |              | 0.81062     |
|  |                |                  |                |               |                 |               | NPR3     |              | 0.94322     |
|  |                |                  |                |               |                 |               | PPL      |              | 0.98066     |
|  |                |                  |                |               |                 |               | RHOBTB2  |              | 0.88150     |
|  |                |                  |                |               |                 |               | RRBP1    |              | 0.99079     |
|  |                |                  |                |               |                 |               | SCGN     |              | 0.53172     |
|  |                |                  |                |               |                 |               | SH3BGR1  |              | 0.96984     |
|  |                |                  |                |               |                 |               | SIDT2    |              | 0.96171     |
|  |                |                  |                |               |                 |               | SLC26A4  |              | 0.95159     |
|  |                |                  |                |               |                 |               | SLC4A11  |              | 0.97972     |
|  |                |                  |                |               |                 |               | TCF25    |              | 0.99435     |
|  |                |                  |                |               |                 |               | TF       |              | 0.64088     |
|  |                |                  |                |               |                 |               | TTC28    |              | 0.95196     |
|  |                |                  |                |               |                 |               | USP5     |              | 0.94598     |
|  |                |                  |                |               |                 |               | WLS      |              | 0.91025     |
|  |                |                  |                |               |                 |               | RNF150   |              | 0.89539     |
|  |                |                  |                |               |                 |               | TXNRD2   |              | 0.99115     |
|  |                |                  |                |               |                 |               | IL6R     |              | 0.93456     |
|  |                |                  |                |               |                 |               | ABHD1    |              | 0.98746     |
|  |                |                  |                |               |                 |               | ALDH2    |              | 0.90380     |
|  |                |                  |                |               |                 |               | ANKRD24  |              | 0.90129     |
|  |                |                  |                |               |                 |               | ATG13    |              | 0.96474     |
|  |                |                  |                |               |                 |               | ATP6V0D1 |              | 0.98711     |
|  |                |                  |                |               |                 |               | BLVRB    |              | 0.96475     |
|  |                |                  |                |               |                 |               | C2CD4A   |              | 0.64306     |
|  |                |                  |                |               |                 |               | CDC42EP1 |              | 0.92432     |
|  |                |                  |                |               |                 |               | CDC42EP4 |              | 0.93708     |
|  |                |                  |                |               |                 |               | CEBPD    |              | 0.56781     |
|  |                |                  |                |               |                 |               | CHPF     |              | 0.99039     |
|  |                |                  |                |               |                 |               | CLN3     |              | 0.92872     |
|  |                |                  |                |               |                 |               | CYB5R2   |              | 0.87411     |
|  |                |                  |                |               |                 |               | EFCAB6   |              | 0.98796     |
|  |                |                  |                |               |                 |               | EMP2     |              | 0.89589     |
|  |                |                  |                |               |                 |               | GUSB     |              | 0.96282     |
|  |                |                  |                |               |                 |               | ICSF5    |              | 0.68813     |
|  |                |                  |                |               |                 |               | LIMK2    |              | 0.97669     |
|  |                |                  |                |               |                 |               | LRRC29   |              | 0.90553     |
|  |                |                  |                |               |                 |               | MAN1B1   |              | 0.93292     |
|  |                |                  |                |               |                 |               | MAPKAPK3 |              | 0.92466     |
|  |                |                  |                |               |                 |               | MED16    |              | 0.85719     |
|  |                |                  |                |               |                 |               | NAGPA    |              | 0.98257     |
|  |                |                  |                |               |                 |               | NUCB1    |              | 0.96006     |
|  |                |                  |                |               |                 |               | PBXIP1   |              | 0.97502     |
|  |                |                  |                |               |                 |               | PGPEP1   |              | 0.96315     |
|  |                |                  |                |               |                 |               | PIP5K1C  |              | 0.96743     |
|  |                |                  |                |               |                 |               | PLCD1    |              | 0.91383     |
|  |                |                  |                |               |                 |               | PLD3     |              | 0.93212     |
|  |                |                  |                |               |                 |               | SLC9B2   |              | 0.95790     |
|  |                |                  |                |               |                 |               | STAT6    |              | 0.97194     |
|  |                |                  |                |               |                 |               | SYTL3    |              | 0.93554     |
|  |                |                  |                |               |                 |               | TBC1D17  |              | 0.84846     |
|  |                |                  |                |               |                 |               | TNK1     |              | 0.97275     |
|  |                |                  |                |               |                 |               | TRAPPC12 |              | 0.85120     |
|  |                |                  |                |               |                 |               | VAMP2    |              | 0.99278     |
|  |                |                  |                |               |                 |               | VPS33B   |              | 0.96597     |
|  |                |                  |                |               |                 |               | WDR45    |              | 0.92676     |

|  | early_above_70 | early_aged_60_70 | early_below_55 | late_above_70 | late_aged_60_70 | late_below_55 | Probe ID | Description | Correlation |
|--|----------------|------------------|----------------|---------------|-----------------|---------------|----------|-------------|-------------|
|  |                |                  |                |               |                 |               | IGF2BP2  |             | 0.90356     |
|  |                |                  |                |               |                 |               | LIMD1    |             | 0.79079     |
|  |                |                  |                |               |                 |               | MAP2     |             | 0.62115     |
|  |                |                  |                |               |                 |               | MDH18    |             | 0.90422     |
|  |                |                  |                |               |                 |               | RFC3     |             | 0.88505     |
|  |                |                  |                |               |                 |               | TBPL1    |             | 0.94988     |
|  |                |                  |                |               |                 |               | TMEM62   |             | 0.97628     |
|  |                |                  |                |               |                 |               | TMEM107  |             | 0.79412     |
|  |                |                  |                |               |                 |               | CCDC65   |             | 0.95033     |
|  |                |                  |                |               |                 |               | CD69     |             | 0.93366     |
|  |                |                  |                |               |                 |               | CD83     |             | 0.98006     |
|  |                |                  |                |               |                 |               | CTDSPL   |             | 0.86121     |
|  |                |                  |                |               |                 |               | EXPH5    |             | 0.98416     |
|  |                |                  |                |               |                 |               | MBNL3    |             | 0.93962     |
|  |                |                  |                |               |                 |               | NFKBIZ   |             | 0.90819     |
|  |                |                  |                |               |                 |               | PTP4A1   |             | 0.94701     |
|  |                |                  |                |               |                 |               | AMN      |             | 0.85290     |
|  |                |                  |                |               |                 |               | ANKS6    |             | 0.90260     |
|  |                |                  |                |               |                 |               | CCDC103  |             | 0.82338     |
|  |                |                  |                |               |                 |               | CD274    |             | 0.84423     |
|  |                |                  |                |               |                 |               | DIAPH1   |             | 0.91420     |
|  |                |                  |                |               |                 |               | PLA2G1B  |             | 0.92953     |
|  |                |                  |                |               |                 |               | REEP4    |             | 0.82787     |
|  |                |                  |                |               |                 |               | SIK2     |             | 0.88263     |
|  |                |                  |                |               |                 |               | SMURF1   |             | 0.94628     |
|  |                |                  |                |               |                 |               | SYP      |             | 0.87209     |
|  |                |                  |                |               |                 |               | TPI1     |             | 0.87392     |
|  |                |                  |                |               |                 |               | VDAC3    |             | 0.73227     |

|  | early_above_70 | early_aged_60_70 | early_below_55 | late_above_70 | late_aged_60_70 | late_below_55 | Probe ID | Description | Correlation |
|--|----------------|------------------|----------------|---------------|-----------------|---------------|----------|-------------|-------------|
|  |                |                  |                |               |                 |               | AAK1     |             | 0.98850     |
|  |                |                  |                |               |                 |               | BCAS3    |             | 0.99033     |
|  |                |                  |                |               |                 |               | CDC14B   |             | 0.90560     |
|  |                |                  |                |               |                 |               | CELF2    |             | 0.99420     |
|  |                |                  |                |               |                 |               | CREBL2   |             | 0.91708     |
|  |                |                  |                |               |                 |               | ERBB3    |             | 0.94092     |
|  |                |                  |                |               |                 |               | GTPBP1   |             | 0.95988     |
|  |                |                  |                |               |                 |               | GYS1     |             | 0.97810     |
|  |                |                  |                |               |                 |               | PGM1     |             | 0.90804     |
|  |                |                  |                |               |                 |               | RIPK1    |             | 0.98625     |
|  |                |                  |                |               |                 |               | SATB2    |             | 0.88688     |
|  |                |                  |                |               |                 |               | SCAMP2   |             | 0.99236     |
|  |                |                  |                |               |                 |               | SPHK2    |             | 0.99439     |
|  |                |                  |                |               |                 |               | SREBF1   |             | 0.97930     |
|  |                |                  |                |               |                 |               | SSPN     |             | 0.98277     |
|  |                |                  |                |               |                 |               | SUMF1    |             | 0.99914     |
|  |                |                  |                |               |                 |               | SLC11A2  |             | 0.93494     |
|  |                |                  |                |               |                 |               | MADD     |             | 0.98900     |
|  |                |                  |                |               |                 |               | ABCD3    |             | 0.93828     |
|  |                |                  |                |               |                 |               | AP1S3    |             | 0.98498     |
|  |                |                  |                |               |                 |               | CAT      |             | 0.96332     |
|  |                |                  |                |               |                 |               | EVI5L    |             | 0.97681     |
|  |                |                  |                |               |                 |               | GNAT2    |             | 0.83379     |
|  |                |                  |                |               |                 |               | KAT2B    |             | 0.97445     |
|  |                |                  |                |               |                 |               | RWDD2B   |             | 0.97455     |
|  |                |                  |                |               |                 |               | SIAE     |             | 0.97772     |
|  |                |                  |                |               |                 |               | SLC16A2  |             | 0.94619     |
|  |                |                  |                |               |                 |               | SORT1    |             | 0.99834     |
|  |                |                  |                |               |                 |               | TBC1D8B  |             | 0.98970     |
|  |                |                  |                |               |                 |               | CNTNAP2  |             | 0.91685     |
|  |                |                  |                |               |                 |               | ALG1     |             | 0.98207     |
|  |                |                  |                |               |                 |               | APOLD1   |             | 0.98977     |
|  |                |                  |                |               |                 |               | FAM217B  |             | 0.93854     |
|  |                |                  |                |               |                 |               | GRAMD1C  |             | 0.98101     |
|  |                |                  |                |               |                 |               | ICMT     |             | 0.96715     |
|  |                |                  |                |               |                 |               | LDHD     |             | 0.97323     |
|  |                |                  |                |               |                 |               | MPL      |             | 0.98059     |
|  |                |                  |                |               |                 |               | PSAP     |             | 0.99364     |
|  |                |                  |                |               |                 |               | SSR3     |             | 0.99589     |
|  |                |                  |                |               |                 |               | TCTN1    |             | 0.99594     |
|  |                |                  |                |               |                 |               | TMC4     |             | 0.99091     |
|  |                |                  |                |               |                 |               | TRIM68   |             | 0.98795     |
|  |                |                  |                |               |                 |               | ZNF652   |             | 0.92284     |

|  | early_above_70 | early_aged_60_70 | early_below_55 | late_above_70 | late_aged_60_70 | late_below_55 | Probe ID | Descripti... | Correlation |
|--|----------------|------------------|----------------|---------------|-----------------|---------------|----------|--------------|-------------|
|  |                |                  |                |               |                 |               | ACAD8    |              | 0.97927     |
|  |                |                  |                |               |                 |               | ACAT2    |              | 0.94907     |
|  |                |                  |                |               |                 |               | AMT      |              | 0.96035     |
|  |                |                  |                |               |                 |               | DUSP16   |              | 0.91856     |
|  |                |                  |                |               |                 |               | ELP3     |              | 0.98800     |
|  |                |                  |                |               |                 |               | FSTL4    |              | 0.93276     |
|  |                |                  |                |               |                 |               | FZD1     |              | 0.99148     |
|  |                |                  |                |               |                 |               | FZD3     |              | 0.94994     |
|  |                |                  |                |               |                 |               | GMD5     |              | 0.96898     |
|  |                |                  |                |               |                 |               | INTS9    |              | 0.95597     |
|  |                |                  |                |               |                 |               | MANSC1   |              | 0.96144     |
|  |                |                  |                |               |                 |               | MBTPS1   |              | 0.98650     |
|  |                |                  |                |               |                 |               | MTFMT    |              | 0.98140     |
|  |                |                  |                |               |                 |               | PEMT     |              | 0.94773     |
|  |                |                  |                |               |                 |               | PTK2B    |              | 0.97334     |
|  |                |                  |                |               |                 |               | PXN      |              | 0.95945     |
|  |                |                  |                |               |                 |               | QSER1    |              | 0.98095     |
|  |                |                  |                |               |                 |               | RAP1GAP2 |              | 0.96514     |
|  |                |                  |                |               |                 |               | SIDT1    |              | 0.97284     |
|  |                |                  |                |               |                 |               | SLC1A5   |              | 0.96726     |
|  |                |                  |                |               |                 |               | SMPDL3B  |              | 0.94029     |
|  |                |                  |                |               |                 |               | TIFA     |              | 0.96986     |
|  |                |                  |                |               |                 |               | TSPAN18  |              | 0.99247     |
|  |                |                  |                |               |                 |               | UBXN8    |              | 0.98528     |
|  |                |                  |                |               |                 |               | ARHGEF37 |              | 0.96252     |
|  |                |                  |                |               |                 |               | CLSTN1   |              | 0.95131     |
|  |                |                  |                |               |                 |               | VPS39    |              | 0.98460     |
|  |                |                  |                |               |                 |               | PRKCB    |              | 0.96681     |
|  |                |                  |                |               |                 |               | CHD3     |              | 0.98392     |
|  |                |                  |                |               |                 |               | MYBPC1   |              | 0.98330     |
|  |                |                  |                |               |                 |               | ABCA10   |              | 0.95698     |
|  |                |                  |                |               |                 |               | BCAS1    |              | 0.99678     |
|  |                |                  |                |               |                 |               | BLNK     |              | 0.97080     |
|  |                |                  |                |               |                 |               | HPN      |              | 0.96496     |
|  |                |                  |                |               |                 |               | HS3ST3A1 |              | 0.95213     |
|  |                |                  |                |               |                 |               | LRCH2    |              | 0.99666     |
|  |                |                  |                |               |                 |               | MLEC     |              | 0.98064     |
|  |                |                  |                |               |                 |               | NISCH    |              | 0.98550     |
|  |                |                  |                |               |                 |               | RAPGEF4  |              | 0.97796     |
|  |                |                  |                |               |                 |               | RPS6KC1  |              | 0.98791     |
|  |                |                  |                |               |                 |               | SARDH    |              | 0.98892     |
|  |                |                  |                |               |                 |               | SH3BP4   |              | 0.99696     |
|  |                |                  |                |               |                 |               | SPCS3    |              | 0.94549     |
|  |                |                  |                |               |                 |               | STARD8   |              | 0.92319     |
|  |                |                  |                |               |                 |               | STYK1    |              | 0.94500     |
|  |                |                  |                |               |                 |               | SUN2     |              | 0.98859     |
|  |                |                  |                |               |                 |               | SYTL4    |              | 0.93227     |
|  |                |                  |                |               |                 |               | WTAP     |              | 0.99274     |
|  |                |                  |                |               |                 |               | YIPF3    |              | 0.96292     |
|  |                |                  |                |               |                 |               | ANXA9    |              | 0.98179     |
|  |                |                  |                |               |                 |               | C2       |              | 0.95599     |
|  |                |                  |                |               |                 |               | CES2     |              | 0.98386     |
|  |                |                  |                |               |                 |               | CNPY3    |              | 0.96772     |
|  |                |                  |                |               |                 |               | DLGAP2   |              | 0.94368     |
|  |                |                  |                |               |                 |               | DPH1     |              | 0.93994     |
|  |                |                  |                |               |                 |               | FAM111A  |              | 0.95883     |
|  |                |                  |                |               |                 |               | FAM174B  |              | 0.92015     |
|  |                |                  |                |               |                 |               | FUT10    |              | 0.97695     |
|  |                |                  |                |               |                 |               | LRRC8E   |              | 0.97973     |
|  |                |                  |                |               |                 |               | NWD1     |              | 0.99552     |
|  |                |                  |                |               |                 |               | PRSS8    |              | 0.99082     |
|  |                |                  |                |               |                 |               | PSTK     |              | 0.97974     |
|  |                |                  |                |               |                 |               | TEP1     |              | 0.96487     |
|  |                |                  |                |               |                 |               | TIGD6    |              | 0.88686     |
|  |                |                  |                |               |                 |               | TRAK1    |              | 0.90281     |
|  |                |                  |                |               |                 |               | TTC38    |              | 0.98015     |

|  | early_above_70 | early_aged_60_70 | early_below_55 | late_above_70 | late_aged_60_70 | late_below_55 | Probe ID | Description | Correlation |
|--|----------------|------------------|----------------|---------------|-----------------|---------------|----------|-------------|-------------|
|  |                |                  |                |               |                 |               | EGLN3    |             | 0.91174     |
|  |                |                  |                |               |                 |               | KAZALD1  |             | 0.95008     |
|  |                |                  |                |               |                 |               | MEPCE    |             | 0.94981     |
|  |                |                  |                |               |                 |               | MPST     |             | 0.87603     |
|  |                |                  |                |               |                 |               | SCNN1A   |             | 0.95722     |
|  |                |                  |                |               |                 |               | SLC12A9  |             | 0.92104     |
|  |                |                  |                |               |                 |               | MOSPD3   |             | 0.88489     |
|  |                |                  |                |               |                 |               | TNFSF9   |             | 0.76559     |
|  |                |                  |                |               |                 |               | CCDC85B  |             | 0.87289     |
|  |                |                  |                |               |                 |               | DUSP2    |             | 0.89745     |
|  |                |                  |                |               |                 |               | JSRP1    |             | 0.91563     |
|  |                |                  |                |               |                 |               | JUND     |             | 0.92884     |
|  |                |                  |                |               |                 |               | ANXA13   |             | 0.90300     |
|  |                |                  |                |               |                 |               | CAPN6    |             | 0.80321     |
|  |                |                  |                |               |                 |               | CYP11A1  |             | 0.89361     |
|  |                |                  |                |               |                 |               | HTR2A    |             | 0.86461     |
|  |                |                  |                |               |                 |               | IL1RN    |             | 0.83975     |
|  |                |                  |                |               |                 |               | NECAB2   |             | 0.57786     |
|  |                |                  |                |               |                 |               | PGF      |             | 0.89649     |
|  |                |                  |                |               |                 |               | TCIRG1   |             | 0.86456     |
|  |                |                  |                |               |                 |               | TRIP6    |             | 0.91923     |
|  |                |                  |                |               |                 |               | TTR      |             | 0.85975     |
|  |                |                  |                |               |                 |               | TMEM238  |             | 0.98407     |
|  |                |                  |                |               |                 |               | DDX11    |             | 0.83035     |
|  |                |                  |                |               |                 |               | EPHA8    |             | 0.91931     |
|  |                |                  |                |               |                 |               | FKBP1    |             | 0.87684     |
|  |                |                  |                |               |                 |               | GNB2     |             | 0.92578     |
|  |                |                  |                |               |                 |               | KLF16    |             | 0.90754     |
|  |                |                  |                |               |                 |               | LRFN2    |             | 0.97237     |
|  |                |                  |                |               |                 |               | PCDHA4   |             | 0.90154     |
|  |                |                  |                |               |                 |               | PDZK1IP1 |             | 0.90506     |
|  |                |                  |                |               |                 |               | RAD9A    |             | 0.90735     |

|  | early_above_70 | early_aged_60_70 | early_below_55 | late_above_70 | late_aged_60_70 | late_below_55 | Probe ID | Description | Correlation |
|--|----------------|------------------|----------------|---------------|-----------------|---------------|----------|-------------|-------------|
|  |                |                  |                |               |                 |               | AKIRIN2  |             | 0.94036     |
|  |                |                  |                |               |                 |               | FAM189A1 |             | 0.89786     |
|  |                |                  |                |               |                 |               | HNRNPD   |             | 0.96363     |
|  |                |                  |                |               |                 |               | NUP54    |             | 0.97817     |
|  |                |                  |                |               |                 |               | ZC2HC1A  |             | 0.91596     |
|  |                |                  |                |               |                 |               | HNRNPH1  |             | 0.97348     |
|  |                |                  |                |               |                 |               | ABT1     |             | 0.96591     |
|  |                |                  |                |               |                 |               | ARL16    |             | 0.92413     |
|  |                |                  |                |               |                 |               | GATA2    |             | 0.99742     |
|  |                |                  |                |               |                 |               | TMEM52   |             | 0.98366     |
|  |                |                  |                |               |                 |               | ZBTB12   |             | 0.98411     |
|  |                |                  |                |               |                 |               | ZNF7     |             | 0.96500     |

|  | early_above_70 | early_aged_60_70 | early_below_55 | late_above_70 | late_aged_60_70 | late_below_55 | Probe ID | Description | Correlation |
|--|----------------|------------------|----------------|---------------|-----------------|---------------|----------|-------------|-------------|
|  |                |                  |                |               |                 |               | ASAP1    |             | 0.95422     |
|  |                |                  |                |               |                 |               | CD200    |             | 0.96799     |
|  |                |                  |                |               |                 |               | CMPK2    |             | 0.97487     |
|  |                |                  |                |               |                 |               | DPYSL2   |             | 0.94846     |
|  |                |                  |                |               |                 |               | IQCE     |             | 0.97785     |
|  |                |                  |                |               |                 |               | MPRIP    |             | 0.98464     |
|  |                |                  |                |               |                 |               | NRP2     |             | 0.91952     |
|  |                |                  |                |               |                 |               | SLC6A6   |             | 0.90540     |
|  |                |                  |                |               |                 |               | AGAP2    |             | 0.97694     |
|  |                |                  |                |               |                 |               | DNA2     |             | 0.97324     |
|  |                |                  |                |               |                 |               | SIGLEC9  |             | 0.94044     |
|  |                |                  |                |               |                 |               | FMNL3    |             | 0.99325     |
|  |                |                  |                |               |                 |               | HCN3     |             | 0.97406     |
|  |                |                  |                |               |                 |               | MLXIP    |             | 0.97120     |
|  |                |                  |                |               |                 |               | PCDH12   |             | 0.98990     |
|  |                |                  |                |               |                 |               | RASA3    |             | 0.98478     |

|  | early_above_70 | early_aged_60_70 | early_below_55 | late_above_70 | late_aged_60_70 | late_below_55 | Probe ID | Description | Correlation |
|--|----------------|------------------|----------------|---------------|-----------------|---------------|----------|-------------|-------------|
|  |                |                  |                |               |                 |               | CLCN6    |             | 0.97019     |
|  |                |                  |                |               |                 |               | PPFIBP1  |             | 0.99574     |
|  |                |                  |                |               |                 |               | FBXL20   |             | 0.98302     |
|  |                |                  |                |               |                 |               | FUT1     |             | 0.96529     |
|  |                |                  |                |               |                 |               | METAP1D  |             | 0.99775     |
|  |                |                  |                |               |                 |               | MOV10    |             | 0.98358     |
|  |                |                  |                |               |                 |               | ZBTB3    |             | 0.98918     |

|  | early_above_70 | early_aged_60_70 | early_below_55 | late_above_70 | late_aged_60_70 | late_below_55 | Probe ID | Description | Correlation |
|--|----------------|------------------|----------------|---------------|-----------------|---------------|----------|-------------|-------------|
|  |                |                  |                |               |                 |               | GARNL3   |             | 0.98316     |
|  |                |                  |                |               |                 |               | PIEZO2   |             | 0.97370     |
|  |                |                  |                |               |                 |               | VPS8     |             | 0.92875     |
|  |                |                  |                |               |                 |               | IRAK4    |             | 0.99468     |
|  |                |                  |                |               |                 |               | SRGAP3   |             | 0.96929     |
|  |                |                  |                |               |                 |               | ACSL4    |             | 0.98614     |
|  |                |                  |                |               |                 |               | FLT1     |             | 0.99000     |
|  |                |                  |                |               |                 |               | LGI2     |             | 0.97494     |
|  |                |                  |                |               |                 |               | LMF1     |             | 0.96852     |
|  |                |                  |                |               |                 |               | PEPD     |             | 0.94262     |
|  |                |                  |                |               |                 |               | PTPRB    |             | 0.94132     |
|  |                |                  |                |               |                 |               | TMOD1    |             | 0.96762     |
|  |                |                  |                |               |                 |               | EYS      |             | 0.98190     |
|  |                |                  |                |               |                 |               | MKNK2    |             | 0.93685     |
|  |                |                  |                |               |                 |               | SHROOM4  |             | 0.96120     |
|  |                |                  |                |               |                 |               | CSRP2    |             | 0.93939     |
|  |                |                  |                |               |                 |               | DNAJB4   |             | 0.97376     |
|  |                |                  |                |               |                 |               | IRAK2    |             | 0.95868     |
|  |                |                  |                |               |                 |               | ITPRIP   |             | 0.99524     |
|  |                |                  |                |               |                 |               | NXPH4    |             | 0.95348     |
|  |                |                  |                |               |                 |               | PLA2G2A  |             | 0.92246     |
|  |                |                  |                |               |                 |               | UBTD1    |             | 0.93956     |

|  | early_above_70 | early_aged_60_70 | early_below_55 | late_above_70 | late_aged_60_70 | late_below_55 | Probe ID | Description | Correlation |
|--|----------------|------------------|----------------|---------------|-----------------|---------------|----------|-------------|-------------|
|  |                |                  |                |               |                 |               | ATP8B4   |             | 0.98056     |
|  |                |                  |                |               |                 |               | DHRS9    |             | 0.97392     |
|  |                |                  |                |               |                 |               | EPO      |             | 0.87520     |
|  |                |                  |                |               |                 |               | ICAM5    |             | 0.99276     |
|  |                |                  |                |               |                 |               | TRPC6    |             | 0.93754     |
|  |                |                  |                |               |                 |               | ZNF831   |             | 0.95492     |
|  |                |                  |                |               |                 |               | BTBD19   |             | 0.97111     |
|  |                |                  |                |               |                 |               | PITPNM2  |             | 0.64426     |
|  |                |                  |                |               |                 |               | CD3G     |             | 0.95686     |
|  |                |                  |                |               |                 |               | PXT1     |             | 0.90634     |

|  | early_above_70 | early_aged_60_70 | early_below_55 | late_above_70 | late_aged_60_70 | late_below_55 | Probe ID | Description | Correlation |
|--|----------------|------------------|----------------|---------------|-----------------|---------------|----------|-------------|-------------|
|  |                |                  |                |               |                 |               | ALDH9A1  |             | 0.97850     |
|  |                |                  |                |               |                 |               | CD164    |             | 0.94734     |
|  |                |                  |                |               |                 |               | HAT1     |             | 0.89490     |
|  |                |                  |                |               |                 |               | IDI1     |             | 0.95753     |
|  |                |                  |                |               |                 |               | LRP11    |             | 0.94714     |
|  |                |                  |                |               |                 |               | MYO1E    |             | 0.95936     |
|  |                |                  |                |               |                 |               | OSBPL9   |             | 0.95358     |
|  |                |                  |                |               |                 |               | PIBF1    |             | 0.99269     |
|  |                |                  |                |               |                 |               | PPM1H    |             | 0.95818     |
|  |                |                  |                |               |                 |               | STAMBP   |             | 0.98843     |
|  |                |                  |                |               |                 |               | TMEM87A  |             | 0.96770     |
|  |                |                  |                |               |                 |               | ATP1A1   |             | 0.94374     |
|  |                |                  |                |               |                 |               | ACSL3    |             | 0.95991     |
|  |                |                  |                |               |                 |               | CCNC     |             | 0.93872     |
|  |                |                  |                |               |                 |               | CLGN     |             | 0.95973     |
|  |                |                  |                |               |                 |               | CLIP4    |             | 0.93184     |
|  |                |                  |                |               |                 |               | HGFAC    |             | 0.88334     |
|  |                |                  |                |               |                 |               | IFNGR1   |             | 0.92347     |
|  |                |                  |                |               |                 |               | KIF16B   |             | 0.97285     |
|  |                |                  |                |               |                 |               | MBNL2    |             | 0.90989     |
|  |                |                  |                |               |                 |               | MTHFS    |             | 0.97388     |
|  |                |                  |                |               |                 |               | NEBL     |             | 0.90911     |
|  |                |                  |                |               |                 |               | PIK3R1   |             | 0.96395     |
|  |                |                  |                |               |                 |               | SLC46A3  |             | 0.97944     |
|  |                |                  |                |               |                 |               | SMAD9    |             | 0.85250     |
|  |                |                  |                |               |                 |               | PTER     |             | 0.96143     |
|  |                |                  |                |               |                 |               | CCK      |             | 0.85236     |
|  |                |                  |                |               |                 |               | ERAP1    |             | 0.96437     |
|  |                |                  |                |               |                 |               | GLB1L    |             | 0.92170     |
|  |                |                  |                |               |                 |               | LMBRD1   |             | 0.98726     |
|  |                |                  |                |               |                 |               | MXRA7    |             | 0.97755     |
|  |                |                  |                |               |                 |               | PLCB1    |             | 0.99168     |
|  |                |                  |                |               |                 |               | SYN12BP  |             | 0.98364     |

|  | early_above_70 | early_aged_60_70 | early_below_55 | late_above_70 | late_aged_60_70 | late_below_55 | Probe ID | Description | Correlation |
|--|----------------|------------------|----------------|---------------|-----------------|---------------|----------|-------------|-------------|
|  |                |                  |                |               |                 |               | COL4A4   |             | 0.94176     |
|  |                |                  |                |               |                 |               | DISP1    |             | 0.93536     |
|  |                |                  |                |               |                 |               | DNAH9    |             | 0.93137     |
|  |                |                  |                |               |                 |               | DTX4     |             | 0.96611     |
|  |                |                  |                |               |                 |               | GFOD1    |             | 0.96240     |
|  |                |                  |                |               |                 |               | NFIC     |             | 0.97237     |
|  |                |                  |                |               |                 |               | PIK3IP1  |             | 0.98424     |
|  |                |                  |                |               |                 |               | PIK3R3   |             | 0.93949     |
|  |                |                  |                |               |                 |               | SOD2     |             | 0.98101     |
|  |                |                  |                |               |                 |               | SYNE2    |             | 0.98837     |
|  |                |                  |                |               |                 |               | TLE3     |             | 0.92922     |
|  |                |                  |                |               |                 |               | WDR37    |             | 0.95728     |
|  |                |                  |                |               |                 |               | TMEM143  |             | 0.91668     |
|  |                |                  |                |               |                 |               | TOM1L2   |             | 0.94208     |
|  |                |                  |                |               |                 |               | ADAMTSS  |             | 0.98202     |
|  |                |                  |                |               |                 |               | ARHGEF5  |             | 0.95901     |
|  |                |                  |                |               |                 |               | ATP6V0A1 |             | 0.99206     |
|  |                |                  |                |               |                 |               | CERS4    |             | 0.98180     |
|  |                |                  |                |               |                 |               | DHDDS    |             | 0.96819     |
|  |                |                  |                |               |                 |               | IQSEC2   |             | 0.95884     |
|  |                |                  |                |               |                 |               | PNPLA6   |             | 0.97822     |
|  |                |                  |                |               |                 |               | POU2F3   |             | 0.93294     |
|  |                |                  |                |               |                 |               | WDTC1    |             | 0.98510     |
|  |                |                  |                |               |                 |               | NEGR1    |             | 0.99544     |
|  |                |                  |                |               |                 |               | SLC20A2  |             | 0.97911     |
|  |                |                  |                |               |                 |               | ABCA7    |             | 0.92181     |
|  |                |                  |                |               |                 |               | C6orf132 |             | 0.90297     |
|  |                |                  |                |               |                 |               | CAMTA2   |             | 0.97149     |
|  |                |                  |                |               |                 |               | CCNDBP1  |             | 0.98543     |
|  |                |                  |                |               |                 |               | GBA      |             | 0.98807     |
|  |                |                  |                |               |                 |               | PTPRU    |             | 0.91298     |
|  |                |                  |                |               |                 |               | SLC6A17  |             | 0.98920     |
|  |                |                  |                |               |                 |               | SPRYD3   |             | 0.98165     |
|  |                |                  |                |               |                 |               | THAP8    |             | 0.98767     |

|  | early_above_70 | early_aged_60_70 | early_below_55 | late_above_70 | late_aged_60_70 | late_below_55 | Probe ID | Description | Correlation |
|--|----------------|------------------|----------------|---------------|-----------------|---------------|----------|-------------|-------------|
|  |                |                  |                |               |                 |               | KCNN1    |             | 0.45634     |
|  |                |                  |                |               |                 |               | KLHL29   |             | 0.96852     |
|  |                |                  |                |               |                 |               | MAPK10   |             | 0.85689     |
|  |                |                  |                |               |                 |               | STAMBPL1 |             | 0.87958     |
|  |                |                  |                |               |                 |               | UCN2     |             | 0.90252     |
|  |                |                  |                |               |                 |               | ADAMTS3  |             | 0.93379     |
|  |                |                  |                |               |                 |               | COL9A1   |             | 0.92430     |
|  |                |                  |                |               |                 |               | EPX      |             | 0.88979     |
|  |                |                  |                |               |                 |               | GATA5    |             | 0.87782     |
|  |                |                  |                |               |                 |               | PCBD1    |             | 0.91753     |
|  |                |                  |                |               |                 |               | TMEM204  |             | 0.80602     |
|  |                |                  |                |               |                 |               | PRCD     |             | 0.84906     |
|  |                |                  |                |               |                 |               | SLC9A5   |             | 0.80194     |



|  | early_above_70 | early_aged_60_70 | early_below_55 | late_above_70 | late_aged_60_70 | late_below_55 | Probe ID | Description | Correlation |
|--|----------------|------------------|----------------|---------------|-----------------|---------------|----------|-------------|-------------|
|  |                |                  |                |               |                 |               | BBS2     |             | 0.93573     |
|  |                |                  |                |               |                 |               | DNAJC17  |             | 0.87336     |
|  |                |                  |                |               |                 |               | MGLL     |             | 0.94290     |
|  |                |                  |                |               |                 |               | MTUS2    |             | 0.95107     |
|  |                |                  |                |               |                 |               | MZF1     |             | 0.89916     |
|  |                |                  |                |               |                 |               | RRNAD1   |             | 0.95668     |
|  |                |                  |                |               |                 |               | EML6     |             | 0.88632     |
|  |                |                  |                |               |                 |               | ASB2     |             | 0.90127     |
|  |                |                  |                |               |                 |               | CATSPERB |             | 0.88263     |
|  |                |                  |                |               |                 |               | CBLC     |             | 0.97677     |
|  |                |                  |                |               |                 |               | CELF6    |             | 0.91731     |
|  |                |                  |                |               |                 |               | CIB2     |             | 0.93859     |
|  |                |                  |                |               |                 |               | CRTAC1   |             | 0.96679     |
|  |                |                  |                |               |                 |               | EBF4     |             | 0.98798     |
|  |                |                  |                |               |                 |               | EDNRA    |             | 0.93040     |
|  |                |                  |                |               |                 |               | MAPK13   |             | 0.98003     |
|  |                |                  |                |               |                 |               | PDK4     |             | 0.96809     |
|  |                |                  |                |               |                 |               | PDZRN3   |             | 0.88099     |
|  |                |                  |                |               |                 |               | PLA2G5   |             | 0.90828     |
|  |                |                  |                |               |                 |               | RBMS3    |             | 0.96118     |
|  |                |                  |                |               |                 |               | RGS2     |             | 0.94709     |
|  |                |                  |                |               |                 |               | RGS22    |             | 0.96294     |
|  |                |                  |                |               |                 |               | RIMBP2   |             | 0.98027     |
|  |                |                  |                |               |                 |               | RNF165   |             | 0.97813     |
|  |                |                  |                |               |                 |               | SMPD3    |             | 0.96035     |
|  |                |                  |                |               |                 |               | TFEB     |             | 0.98239     |
|  |                |                  |                |               |                 |               | TMTC4    |             | 0.96121     |
|  |                |                  |                |               |                 |               | ZNF614   |             | 0.82998     |
|  |                |                  |                |               |                 |               | C2CD4D   |             | 0.95529     |
|  |                |                  |                |               |                 |               | CLDND2   |             | 0.92853     |
|  |                |                  |                |               |                 |               | KLK11    |             | 0.93382     |
|  |                |                  |                |               |                 |               | MCC      |             | 0.98527     |
|  |                |                  |                |               |                 |               | PLA2G6   |             | 0.99377     |
|  |                |                  |                |               |                 |               | SHC2     |             | 0.81945     |
|  |                |                  |                |               |                 |               | TMEM79   |             | 0.99053     |

|  | early_above_70 | early_aged_60_70 | early_below_55 | late_above_70 | late_aged_60_70 | late_below_55 | Probe ID | Description | Correlation |
|--|----------------|------------------|----------------|---------------|-----------------|---------------|----------|-------------|-------------|
|  |                |                  |                |               |                 |               | NR6A1    |             | 0.97070     |
|  |                |                  |                |               |                 |               | IGSF10   |             | 0.95083     |
|  |                |                  |                |               |                 |               | NEK6     |             | 0.78891     |
|  |                |                  |                |               |                 |               | OPN3     |             | 0.86631     |
|  |                |                  |                |               |                 |               | TMEM156  |             | 0.92097     |
|  |                |                  |                |               |                 |               | LIPC     |             | 0.85214     |
|  |                |                  |                |               |                 |               | PRR15L   |             | 0.80954     |

|  | early_above_70 | early_aged_60_70 | early_below_55 | late_above_70 | late_aged_60_70 | late_below_55 | Probe ID | Description | Correlation |
|--|----------------|------------------|----------------|---------------|-----------------|---------------|----------|-------------|-------------|
|  |                |                  |                |               |                 |               | CDKN2B   |             | 0.98891     |
|  |                |                  |                |               |                 |               | DZIP1L   |             | 0.96058     |
|  |                |                  |                |               |                 |               | FSCN1    |             | 0.97172     |
|  |                |                  |                |               |                 |               | PIM1     |             | 0.98647     |
|  |                |                  |                |               |                 |               | SERPINE2 |             | 0.98717     |
|  |                |                  |                |               |                 |               | SLC16A3  |             | 0.95588     |
|  |                |                  |                |               |                 |               | CERKL    |             | 0.98263     |
|  |                |                  |                |               |                 |               | MAFB     |             | 0.98799     |
|  |                |                  |                |               |                 |               | ANKRD13A |             | 0.95974     |
|  |                |                  |                |               |                 |               | KBTBD2   |             | 0.97861     |
|  |                |                  |                |               |                 |               | RELL1    |             | 0.98001     |
|  |                |                  |                |               |                 |               | RNASEK   |             | 0.93643     |

|  | early_above_70 | early_aged_60_70 | early_below_55 | late_above_70 | late_aged_60_70 | late_below_55 | Probe ID | Description | Correlation |
|--|----------------|------------------|----------------|---------------|-----------------|---------------|----------|-------------|-------------|
|  |                |                  |                |               |                 |               | DDHD2    |             | 0.86148     |
|  |                |                  |                |               |                 |               | NFATC2   |             | 0.91201     |
|  |                |                  |                |               |                 |               | SFXN2    |             | 0.84924     |
|  |                |                  |                |               |                 |               | TOX3     |             | 0.63688     |
|  |                |                  |                |               |                 |               | TRIM36   |             | 0.83085     |
|  |                |                  |                |               |                 |               | UAP1     |             | 0.95075     |
|  |                |                  |                |               |                 |               | CTSG     |             | 0.97246     |
|  |                |                  |                |               |                 |               | ELAVL2   |             | 0.87361     |
|  |                |                  |                |               |                 |               | EPHA4    |             | 0.88319     |
|  |                |                  |                |               |                 |               | GLUD1    |             | 0.88443     |
|  |                |                  |                |               |                 |               | HMGCLL1  |             | 0.97283     |
|  |                |                  |                |               |                 |               | MAP2K6   |             | 0.84692     |
|  |                |                  |                |               |                 |               | MCF2     |             | 0.97943     |
|  |                |                  |                |               |                 |               | MSTN     |             | 0.71552     |
|  |                |                  |                |               |                 |               | OSGIN1   |             | 0.92155     |
|  |                |                  |                |               |                 |               | SLC25A48 |             | 0.92136     |
|  |                |                  |                |               |                 |               | TMSB15A  |             | 0.74296     |
|  |                |                  |                |               |                 |               | WDR17    |             | 0.67005     |
|  |                |                  |                |               |                 |               | DAB1     |             | 0.96686     |
|  |                |                  |                |               |                 |               | ASAH2    |             | 0.96472     |
|  |                |                  |                |               |                 |               | C20orf96 |             | 0.79583     |
|  |                |                  |                |               |                 |               | EXTL2    |             | 0.84043     |
|  |                |                  |                |               |                 |               | MYLPF    |             | 0.96693     |
|  |                |                  |                |               |                 |               | SP8      |             | 0.70513     |
|  |                |                  |                |               |                 |               | SPRED3   |             | 0.92723     |
|  |                |                  |                |               |                 |               | SRMS     |             | 0.73397     |
|  |                |                  |                |               |                 |               | ZNF114   |             | 0.96587     |

|  | early_above_70 | early_aged_60_70 | early_below_55 | late_above_70 | late_aged_60_70 | late_below_55 | Probe ID | Description | Correlation |
|--|----------------|------------------|----------------|---------------|-----------------|---------------|----------|-------------|-------------|
|  |                |                  |                |               |                 |               | CEP78    |             | 0.98567     |
|  |                |                  |                |               |                 |               | G3BP1    |             | 0.97604     |
|  |                |                  |                |               |                 |               | HAUS6    |             | 0.91753     |
|  |                |                  |                |               |                 |               | IGF2BP3  |             | 0.95038     |
|  |                |                  |                |               |                 |               | KIF20B   |             | 0.96002     |
|  |                |                  |                |               |                 |               | PLK4     |             | 0.97006     |
|  |                |                  |                |               |                 |               | POLE2    |             | 0.93516     |
|  |                |                  |                |               |                 |               | SNX10    |             | 0.98465     |
|  |                |                  |                |               |                 |               | STARD3NL |             | 0.84473     |
|  |                |                  |                |               |                 |               | TTC26    |             | 0.86519     |
|  |                |                  |                |               |                 |               | ZFAND1   |             | 0.92973     |
|  |                |                  |                |               |                 |               | CDCA7L   |             | 0.96227     |
|  |                |                  |                |               |                 |               | ARHGAP39 |             | 0.98199     |
|  |                |                  |                |               |                 |               | BRCA2    |             | 0.97433     |
|  |                |                  |                |               |                 |               | COL11A1  |             | 0.97690     |
|  |                |                  |                |               |                 |               | DNMT3A   |             | 0.94983     |
|  |                |                  |                |               |                 |               | ESRP1    |             | 0.98117     |
|  |                |                  |                |               |                 |               | FANCD2   |             | 0.94720     |
|  |                |                  |                |               |                 |               | IFIT2    |             | 0.91588     |
|  |                |                  |                |               |                 |               | KLB      |             | 0.89772     |
|  |                |                  |                |               |                 |               | MCM2     |             | 0.94180     |
|  |                |                  |                |               |                 |               | MNX1     |             | 0.95155     |
|  |                |                  |                |               |                 |               | NCAPG2   |             | 0.98479     |
|  |                |                  |                |               |                 |               | OTUD6B   |             | 0.97008     |
|  |                |                  |                |               |                 |               | TFR2     |             | 0.87447     |
|  |                |                  |                |               |                 |               | ZNF618   |             | 0.90240     |
|  |                |                  |                |               |                 |               | MYBL1    |             | 0.94410     |
|  |                |                  |                |               |                 |               | SLC34A3  |             | 0.92402     |
|  |                |                  |                |               |                 |               | C18orf54 |             | 0.98747     |
|  |                |                  |                |               |                 |               | DCST1    |             | 0.73800     |
|  |                |                  |                |               |                 |               | EME2     |             | 0.89478     |
|  |                |                  |                |               |                 |               | FANCG    |             | 0.95175     |
|  |                |                  |                |               |                 |               | GPR137C  |             | 0.92533     |
|  |                |                  |                |               |                 |               | MRPL15   |             | 0.96904     |
|  |                |                  |                |               |                 |               | MTBP     |             | 0.94848     |
|  |                |                  |                |               |                 |               | RAD54B   |             | 0.97720     |

|  | early_above_70 | early_aged_60_70 | early_below_55 | late_above_70 | late_aged_60_70 | late_below_55 | Probe ID  | Description | Correlation |
|--|----------------|------------------|----------------|---------------|-----------------|---------------|-----------|-------------|-------------|
|  |                |                  |                |               |                 |               | GUK1      |             | 0.80907     |
|  |                |                  |                |               |                 |               | TNFRSF12A |             | 0.72619     |
|  |                |                  |                |               |                 |               | ZMYND10   |             | 0.94229     |
|  |                |                  |                |               |                 |               | KCP       |             | 0.97355     |
|  |                |                  |                |               |                 |               | CORO7     |             | 0.93494     |
|  |                |                  |                |               |                 |               | DPM2      |             | 0.90342     |
|  |                |                  |                |               |                 |               | KRT7      |             | 0.79291     |
|  |                |                  |                |               |                 |               | TIMM13    |             | 0.71998     |
|  |                |                  |                |               |                 |               | TMEM45A   |             | 0.91211     |
|  |                |                  |                |               |                 |               | USP2      |             | 0.90916     |
|  |                |                  |                |               |                 |               | WDR63     |             | 0.84386     |
|  |                |                  |                |               |                 |               | ZNHIT1    |             | 0.83183     |

|  | early_above_70 | early_aged_60_70 | early_below_55 | late_above_70 | late_aged_60_70 | late_below_55 | Probe ID | Description | Correlation |
|--|----------------|------------------|----------------|---------------|-----------------|---------------|----------|-------------|-------------|
|  |                |                  |                |               |                 |               | SCD      |             | 0.85657     |
|  |                |                  |                |               |                 |               | SPINK5   |             | 0.90141     |
|  |                |                  |                |               |                 |               | ALDH8A1  |             | 0.88577     |
|  |                |                  |                |               |                 |               | BARD1    |             | 0.74551     |
|  |                |                  |                |               |                 |               | C4orf33  |             | 0.87412     |
|  |                |                  |                |               |                 |               | MADCAM1  |             | 0.91699     |
|  |                |                  |                |               |                 |               | SLC16A7  |             | 0.93741     |
|  |                |                  |                |               |                 |               | SNAP91   |             | 0.96501     |
|  |                |                  |                |               |                 |               | AREG     |             | 0.96973     |

|  | early_above_70 | early_aged_60_70 | early_below_55 | late_above_70 | late_aged_60_70 | late_below_55 | Probe ID | Description | Correlation |
|--|----------------|------------------|----------------|---------------|-----------------|---------------|----------|-------------|-------------|
|  |                |                  |                |               |                 |               | GSTP1    |             | 0.93686     |
|  |                |                  |                |               |                 |               | ID3      |             | 0.93239     |
|  |                |                  |                |               |                 |               | KPTN     |             | 0.95086     |
|  |                |                  |                |               |                 |               | DPM3     |             | 0.96540     |
|  |                |                  |                |               |                 |               | RPL13A   |             | 0.78980     |
|  |                |                  |                |               |                 |               | ATP6V1B1 |             | 0.92327     |
|  |                |                  |                |               |                 |               | ELF5     |             | 0.95527     |
|  |                |                  |                |               |                 |               | NTN5     |             | 0.88339     |
|  |                |                  |                |               |                 |               | TRIP10   |             | 0.98266     |
|  |                |                  |                |               |                 |               | VIPR2    |             | 0.86957     |
|  |                |                  |                |               |                 |               | BCO2     |             | 0.95831     |
|  |                |                  |                |               |                 |               | DNAJC4   |             | 0.96963     |
|  |                |                  |                |               |                 |               | MBLAC1   |             | 0.81425     |
|  |                |                  |                |               |                 |               | SLC25A37 |             | 0.87615     |
|  |                |                  |                |               |                 |               | TMPRSS9  |             | 0.83366     |
|  |                |                  |                |               |                 |               | ZNF692   |             | 0.94097     |

|  | early_above_70 | early_aged_60_70 | early_below_55 | late_above_70 | late_aged_60_70 | late_below_55 | Probe ID | Description | Correlation |
|--|----------------|------------------|----------------|---------------|-----------------|---------------|----------|-------------|-------------|
|  |                |                  |                |               |                 |               | CCDC102B |             | 0.98640     |
|  |                |                  |                |               |                 |               | F2RL3    |             | 0.94071     |
|  |                |                  |                |               |                 |               | LAMA3    |             | 0.98921     |
|  |                |                  |                |               |                 |               | LAMTOR3  |             | 0.97861     |
|  |                |                  |                |               |                 |               | PLSCR4   |             | 0.96058     |
|  |                |                  |                |               |                 |               | REXO2    |             | 0.98070     |
|  |                |                  |                |               |                 |               | SNRPD3   |             | 0.95606     |
|  |                |                  |                |               |                 |               | TLL2     |             | 0.97384     |
|  |                |                  |                |               |                 |               | TMEM123  |             | 0.98545     |
|  |                |                  |                |               |                 |               | SSB      |             | 0.95630     |
|  |                |                  |                |               |                 |               | TMEM45B  |             | 0.99263     |
|  |                |                  |                |               |                 |               | TRNT1    |             | 0.96731     |
|  |                |                  |                |               |                 |               | ATP6V1G1 |             | 0.94790     |
|  |                |                  |                |               |                 |               | TMEM126B |             | 0.93819     |
|  |                |                  |                |               |                 |               | ZC3H15   |             | 0.94972     |

|  | early_above_70 | early_aged_60_70 | early_below_55 | late_above_70 | late_aged_60_70 | late_below_55 | Probe ID | Description | Correlation |
|--|----------------|------------------|----------------|---------------|-----------------|---------------|----------|-------------|-------------|
|  |                |                  |                |               |                 |               | ARRDC3   |             | 0.93240     |
|  |                |                  |                |               |                 |               | ATL2     |             | 0.97956     |
|  |                |                  |                |               |                 |               | CLIP1    |             | 0.97424     |
|  |                |                  |                |               |                 |               | FKBP14   |             | 0.95745     |
|  |                |                  |                |               |                 |               | HS2ST1   |             | 0.90989     |
|  |                |                  |                |               |                 |               | IARS2    |             | 0.98523     |
|  |                |                  |                |               |                 |               | KIFAP3   |             | 0.98076     |
|  |                |                  |                |               |                 |               | MTMR12   |             | 0.88723     |
|  |                |                  |                |               |                 |               | NUP153   |             | 0.96009     |
|  |                |                  |                |               |                 |               | NUP155   |             | 0.98647     |
|  |                |                  |                |               |                 |               | PMS2     |             | 0.96928     |
|  |                |                  |                |               |                 |               | SNX30    |             | 0.97185     |
|  |                |                  |                |               |                 |               | ZFP64    |             | 0.99860     |
|  |                |                  |                |               |                 |               | LRBA     |             | 0.98965     |
|  |                |                  |                |               |                 |               | APAF1    |             | 0.99248     |
|  |                |                  |                |               |                 |               | ARL6     |             | 0.96694     |
|  |                |                  |                |               |                 |               | CAND1    |             | 0.97202     |
|  |                |                  |                |               |                 |               | CBL      |             | 0.98317     |
|  |                |                  |                |               |                 |               | CPNE3    |             | 0.96177     |
|  |                |                  |                |               |                 |               | DIAPH2   |             | 0.97927     |
|  |                |                  |                |               |                 |               | EARS2    |             | 0.98562     |
|  |                |                  |                |               |                 |               | FAM160B1 |             | 0.95621     |
|  |                |                  |                |               |                 |               | FKTN     |             | 0.99358     |
|  |                |                  |                |               |                 |               | FOXN1    |             | 0.87406     |
|  |                |                  |                |               |                 |               | NCEH1    |             | 0.97611     |
|  |                |                  |                |               |                 |               | RCBTB1   |             | 0.97719     |
|  |                |                  |                |               |                 |               | SNCA     |             | 0.95324     |
|  |                |                  |                |               |                 |               | TBC1D12  |             | 0.94695     |
|  |                |                  |                |               |                 |               | UGCG     |             | 0.97132     |
|  |                |                  |                |               |                 |               | ATF7IP   |             | 0.93081     |
|  |                |                  |                |               |                 |               | SLC12A8  |             | 0.89352     |
|  |                |                  |                |               |                 |               | ABHD6    |             | 0.89138     |
|  |                |                  |                |               |                 |               | ASPH     |             | 0.94482     |
|  |                |                  |                |               |                 |               | CEP135   |             | 0.98050     |
|  |                |                  |                |               |                 |               | CHRNA7   |             | 0.91078     |
|  |                |                  |                |               |                 |               | CREB3L2  |             | 0.85323     |
|  |                |                  |                |               |                 |               | PELI1    |             | 0.95551     |
|  |                |                  |                |               |                 |               | SMC5     |             | 0.98671     |
|  |                |                  |                |               |                 |               | TMPPE    |             | 0.92801     |

|  | early_above_70 | early_aged_60_70 | early_below_55 | late_above_70 | late_aged_60_70 | late_below_55 | Probe ID | Description | Correlation |
|--|----------------|------------------|----------------|---------------|-----------------|---------------|----------|-------------|-------------|
|  |                |                  |                |               |                 |               | CHRM3    |             | 0.97202     |
|  |                |                  |                |               |                 |               | FFAR2    |             | 0.89631     |
|  |                |                  |                |               |                 |               | HAPLN2   |             | 0.95780     |
|  |                |                  |                |               |                 |               | RNF128   |             | 0.89154     |
|  |                |                  |                |               |                 |               | CCDC57   |             | 0.99487     |
|  |                |                  |                |               |                 |               | MZB1     |             | 0.84992     |
|  |                |                  |                |               |                 |               | RPS27L   |             | 0.96332     |
|  |                |                  |                |               |                 |               | SERINC4  |             | 0.93659     |
|  |                |                  |                |               |                 |               | ZNF511   |             | 0.97172     |

|  | early_above_70 | early_aged_60_70 | early_below_55 | late_above_70 | late_aged_60_70 | late_below_55 | Probe ID   | Descripti... | Correlation |
|--|----------------|------------------|----------------|---------------|-----------------|---------------|------------|--------------|-------------|
|  |                |                  |                |               |                 |               | FYN        |              | 0.96782     |
|  |                |                  |                |               |                 |               | GAB2       |              | 0.98121     |
|  |                |                  |                |               |                 |               | INPP4A     |              | 0.91879     |
|  |                |                  |                |               |                 |               | KYNU       |              | 0.98110     |
|  |                |                  |                |               |                 |               | PLEKHA8    |              | 0.91291     |
|  |                |                  |                |               |                 |               | PLEKHG1    |              | 0.97920     |
|  |                |                  |                |               |                 |               | PRR5L      |              | 0.98230     |
|  |                |                  |                |               |                 |               | RASGRP3    |              | 0.99038     |
|  |                |                  |                |               |                 |               | RFTN1      |              | 0.98127     |
|  |                |                  |                |               |                 |               | RGSS       |              | 0.97800     |
|  |                |                  |                |               |                 |               | SEMA4F     |              | 0.95410     |
|  |                |                  |                |               |                 |               | SH3KBP1    |              | 0.96173     |
|  |                |                  |                |               |                 |               | SULF1      |              | 0.96693     |
|  |                |                  |                |               |                 |               | UBR5       |              | 0.89551     |
|  |                |                  |                |               |                 |               | USP35      |              | 0.97631     |
|  |                |                  |                |               |                 |               | ABCB4      |              | 0.97653     |
|  |                |                  |                |               |                 |               | ADAM12     |              | 0.97857     |
|  |                |                  |                |               |                 |               | APBB1IP    |              | 0.95206     |
|  |                |                  |                |               |                 |               | ARHGAP9    |              | 0.92774     |
|  |                |                  |                |               |                 |               | ARHGEF2    |              | 0.93059     |
|  |                |                  |                |               |                 |               | ARHGEF6    |              | 0.96186     |
|  |                |                  |                |               |                 |               | CD53       |              | 0.97370     |
|  |                |                  |                |               |                 |               | CDH11      |              | 0.95487     |
|  |                |                  |                |               |                 |               | CLIC2      |              | 0.99056     |
|  |                |                  |                |               |                 |               | COL8A1     |              | 0.98851     |
|  |                |                  |                |               |                 |               | CPXM2      |              | 0.95533     |
|  |                |                  |                |               |                 |               | CREB5      |              | 0.96973     |
|  |                |                  |                |               |                 |               | CTTNBP2NL  |              | 0.89605     |
|  |                |                  |                |               |                 |               | DOCK10     |              | 0.98555     |
|  |                |                  |                |               |                 |               | DRAM1      |              | 0.97133     |
|  |                |                  |                |               |                 |               | ELF4       |              | 0.97515     |
|  |                |                  |                |               |                 |               | ENPEP      |              | 0.98910     |
|  |                |                  |                |               |                 |               | FGL2       |              | 0.92397     |
|  |                |                  |                |               |                 |               | FN1        |              | 0.96032     |
|  |                |                  |                |               |                 |               | FUT8       |              | 0.85027     |
|  |                |                  |                |               |                 |               | MAP4K4     |              | 0.97651     |
|  |                |                  |                |               |                 |               | MYCT1      |              | 0.97932     |
|  |                |                  |                |               |                 |               | PIK3R5     |              | 0.96690     |
|  |                |                  |                |               |                 |               | SASH3      |              | 0.93045     |
|  |                |                  |                |               |                 |               | SCARF1     |              | 0.97943     |
|  |                |                  |                |               |                 |               | SLC43A3    |              | 0.90915     |
|  |                |                  |                |               |                 |               | SP140      |              | 0.98135     |
|  |                |                  |                |               |                 |               | ST8SIA4    |              | 0.98716     |
|  |                |                  |                |               |                 |               | TFEC       |              | 0.98633     |
|  |                |                  |                |               |                 |               | TNFRSF18   |              | 0.94007     |
|  |                |                  |                |               |                 |               | TNFSF8     |              | 0.97853     |
|  |                |                  |                |               |                 |               | UACA       |              | 0.98382     |
|  |                |                  |                |               |                 |               | WIPF1      |              | 0.95719     |
|  |                |                  |                |               |                 |               | ATXN7      |              | 0.93849     |
|  |                |                  |                |               |                 |               | CSGALNA... |              | 0.96512     |
|  |                |                  |                |               |                 |               | FAM78A     |              | 0.98076     |
|  |                |                  |                |               |                 |               | MYLIP      |              | 0.97505     |
|  |                |                  |                |               |                 |               | BCL2       |              | 0.86944     |
|  |                |                  |                |               |                 |               | CD5        |              | 0.97080     |
|  |                |                  |                |               |                 |               | DNMT1      |              | 0.95109     |
|  |                |                  |                |               |                 |               | STK17A     |              | 0.93623     |

|  | early_above_70 | early_aged_60_70 | early_below_55 | late_above_70 | late_aged_60_70 | late_below_55 | Probe ID | Description | Correlation |
|--|----------------|------------------|----------------|---------------|-----------------|---------------|----------|-------------|-------------|
|  |                |                  |                |               |                 |               | CNTN3    |             | 0.97942     |
|  |                |                  |                |               |                 |               | CYP1B1   |             | 0.98363     |
|  |                |                  |                |               |                 |               | ERGIC1   |             | 0.99096     |
|  |                |                  |                |               |                 |               | ITPR2    |             | 0.98889     |
|  |                |                  |                |               |                 |               | KCNQ1    |             | 0.96246     |
|  |                |                  |                |               |                 |               | PIAS2    |             | 0.98249     |
|  |                |                  |                |               |                 |               | PPP1R12B |             | 0.98006     |
|  |                |                  |                |               |                 |               | PRDM11   |             | 0.98408     |
|  |                |                  |                |               |                 |               | RANBP10  |             | 0.98683     |
|  |                |                  |                |               |                 |               | SEMA3C   |             | 0.97756     |
|  |                |                  |                |               |                 |               | SLC22A23 |             | 0.94899     |
|  |                |                  |                |               |                 |               | SMAD4    |             | 0.96285     |
|  |                |                  |                |               |                 |               | TBC1D30  |             | 0.96060     |
|  |                |                  |                |               |                 |               | VPS26B   |             | 0.98552     |
|  |                |                  |                |               |                 |               | BCL2L2   |             | 0.99824     |
|  |                |                  |                |               |                 |               | IST1     |             | 0.99471     |
|  |                |                  |                |               |                 |               | COG8     |             | 0.99280     |
|  |                |                  |                |               |                 |               | DCAF11   |             | 0.99591     |
|  |                |                  |                |               |                 |               | DNAH5    |             | 0.92215     |
|  |                |                  |                |               |                 |               | DOCK5    |             | 0.98261     |
|  |                |                  |                |               |                 |               | IL1R1    |             | 0.96191     |
|  |                |                  |                |               |                 |               | OSBPL5   |             | 0.71366     |
|  |                |                  |                |               |                 |               | PSD4     |             | 0.97582     |
|  |                |                  |                |               |                 |               | SLC27A2  |             | 0.99769     |
|  |                |                  |                |               |                 |               | TERF2    |             | 0.96553     |
|  |                |                  |                |               |                 |               | TNFSF10  |             | 0.98534     |
|  |                |                  |                |               |                 |               | ACTN1    |             | 0.96927     |
|  |                |                  |                |               |                 |               | BAIAP3   |             | 0.94436     |
|  |                |                  |                |               |                 |               | DHX38    |             | 0.98505     |
|  |                |                  |                |               |                 |               | IRS1     |             | 0.96404     |
|  |                |                  |                |               |                 |               | KRBA2    |             | 0.98877     |
|  |                |                  |                |               |                 |               | MTOR     |             | 0.99226     |
|  |                |                  |                |               |                 |               | PTEN     |             | 0.97217     |
|  |                |                  |                |               |                 |               | TECPR1   |             | 0.96736     |

|  | early_above_70 | early_aged_60_70 | early_below_55 | late_above_70 | late_aged_60_70 | late_below_55 | Probe ID | Description | Correlation |
|--|----------------|------------------|----------------|---------------|-----------------|---------------|----------|-------------|-------------|
|  |                |                  |                |               |                 |               | FBXL16   |             | 0.98347     |
|  |                |                  |                |               |                 |               | FTL      |             | 0.94499     |
|  |                |                  |                |               |                 |               | MAP3K8   |             | 0.93771     |
|  |                |                  |                |               |                 |               | POLD3    |             | 0.94661     |
|  |                |                  |                |               |                 |               | STAB2    |             | 0.92930     |
|  |                |                  |                |               |                 |               | XYLB     |             | 0.98321     |
|  |                |                  |                |               |                 |               | PABPC4   |             | 0.96873     |
|  |                |                  |                |               |                 |               | KALRN    |             | 0.95179     |
|  |                |                  |                |               |                 |               | C5       |             | 0.87471     |
|  |                |                  |                |               |                 |               | CCDC148  |             | 0.97314     |
|  |                |                  |                |               |                 |               | DCLRE1B  |             | 0.93275     |
|  |                |                  |                |               |                 |               | FMO1     |             | 0.82806     |
|  |                |                  |                |               |                 |               | HEY2     |             | 0.84551     |
|  |                |                  |                |               |                 |               | LRIG3    |             | 0.76654     |
|  |                |                  |                |               |                 |               | OSBPL3   |             | 0.97471     |
|  |                |                  |                |               |                 |               | PTDSS1   |             | 0.97809     |
|  |                |                  |                |               |                 |               | RHOBTB1  |             | 0.93575     |
|  |                |                  |                |               |                 |               | SYBU     |             | 0.91969     |
|  |                |                  |                |               |                 |               | CHMP4C   |             | 0.95071     |
|  |                |                  |                |               |                 |               | FADS3    |             | 0.88403     |
|  |                |                  |                |               |                 |               | GATAD2A  |             | 0.96976     |
|  |                |                  |                |               |                 |               | PSRC1    |             | 0.91737     |

|  | early_above_70 | early_aged_60_70 | early_below_55 | late_above_70 | late_aged_60_70 | late_below_55 | Probe ID | Description | Correlation |
|--|----------------|------------------|----------------|---------------|-----------------|---------------|----------|-------------|-------------|
|  |                |                  |                |               |                 |               | BARX2    |             | 0.92587     |
|  |                |                  |                |               |                 |               | CYP4B1   |             | 0.96659     |
|  |                |                  |                |               |                 |               | NFE2     |             | 0.72019     |
|  |                |                  |                |               |                 |               | NRG1     |             | 0.76157     |
|  |                |                  |                |               |                 |               | SHB      |             | 0.87860     |
|  |                |                  |                |               |                 |               | TP63     |             | 0.82907     |
|  |                |                  |                |               |                 |               | FITM1    |             | 0.90805     |
|  |                |                  |                |               |                 |               | HSD11B1  |             | 0.82783     |
|  |                |                  |                |               |                 |               | RASSF10  |             | 0.72019     |
|  |                |                  |                |               |                 |               | C9orf24  |             | 0.83864     |
|  |                |                  |                |               |                 |               | CCDC159  |             | 0.94180     |
|  |                |                  |                |               |                 |               | CXCL17   |             | 0.72019     |
|  |                |                  |                |               |                 |               | EFCAB5   |             | 0.83529     |
|  |                |                  |                |               |                 |               | HR       |             | 0.97350     |
|  |                |                  |                |               |                 |               | MT1X     |             | 0.96265     |
|  |                |                  |                |               |                 |               | SCRN2    |             | 0.87627     |
|  |                |                  |                |               |                 |               | SOCS1    |             | 0.98977     |
|  |                |                  |                |               |                 |               | SP6      |             | 0.90412     |

|  | early_above_70 | early_aged_60_70 | early_below_55 | late_above_70 | late_aged_60_70 | late_below_55 | Probe ID    | Description | Correlation |
|--|----------------|------------------|----------------|---------------|-----------------|---------------|-------------|-------------|-------------|
|  |                |                  |                |               |                 |               | OVOL2       |             | 0.96480     |
|  |                |                  |                |               |                 |               | RFX2        |             | 0.88853     |
|  |                |                  |                |               |                 |               | RPL28       |             | 0.97944     |
|  |                |                  |                |               |                 |               | RPL36       |             | 0.95917     |
|  |                |                  |                |               |                 |               | RPS15       |             | 0.97693     |
|  |                |                  |                |               |                 |               | RPS27A      |             | 0.98406     |
|  |                |                  |                |               |                 |               | RPS5        |             | 0.97326     |
|  |                |                  |                |               |                 |               | RPS6        |             | 0.97581     |
|  |                |                  |                |               |                 |               | RPL12       |             | 0.94074     |
|  |                |                  |                |               |                 |               | RPL4        |             | 0.96834     |
|  |                |                  |                |               |                 |               | RPS16       |             | 0.99115     |
|  |                |                  |                |               |                 |               | ECI1        |             | 0.96986     |
|  |                |                  |                |               |                 |               | RPL34       |             | 0.98295     |
|  |                |                  |                |               |                 |               | RPLP0       |             | 0.96273     |
|  |                |                  |                |               |                 |               | RPS19       |             | 0.99406     |
|  |                |                  |                |               |                 |               | RPS9        |             | 0.98904     |
|  |                |                  |                |               |                 |               | EEF1B2      |             | 0.99378     |
|  |                |                  |                |               |                 |               | MACROD1     |             | 0.79872     |
|  |                |                  |                |               |                 |               | NACAD       |             | 0.73811     |
|  |                |                  |                |               |                 |               | RPS8        |             | 0.98441     |
|  |                |                  |                |               |                 |               | SLC2A4RG    |             | 0.85878     |
|  |                |                  |                |               |                 |               | VTN         |             | 0.94379     |
|  |                |                  |                |               |                 |               | LOC10028... |             | 0.98717     |
|  |                |                  |                |               |                 |               | RPL23A      |             | 0.99553     |
|  |                |                  |                |               |                 |               | RPL29       |             | 0.98183     |
|  |                |                  |                |               |                 |               | RPSA        |             | 0.96628     |
|  |                |                  |                |               |                 |               | C1orf54     |             | 0.87920     |
|  |                |                  |                |               |                 |               | CCDC116     |             | 0.95714     |
|  |                |                  |                |               |                 |               | FAU         |             | 0.88591     |
|  |                |                  |                |               |                 |               | INO80B      |             | 0.84405     |
|  |                |                  |                |               |                 |               | POP5        |             | 0.98560     |
|  |                |                  |                |               |                 |               | PSMG4       |             | 0.93247     |
|  |                |                  |                |               |                 |               | RPL14       |             | 0.98562     |
|  |                |                  |                |               |                 |               | RPL19       |             | 0.99403     |
|  |                |                  |                |               |                 |               | RPL26       |             | 0.85291     |
|  |                |                  |                |               |                 |               | RPL27A      |             | 0.99290     |
|  |                |                  |                |               |                 |               | RPS10       |             | 0.96077     |
|  |                |                  |                |               |                 |               | RPS11       |             | 0.99106     |
|  |                |                  |                |               |                 |               | RPS2        |             | 0.94759     |
|  |                |                  |                |               |                 |               | SLC25A6     |             | 0.93062     |
|  |                |                  |                |               |                 |               | ZNF593      |             | 0.92543     |



|  | early_above_70 | early_aged_60_70 | early_below_55 | late_above_70 | late_aged_60_70 | late_below_55 | Probe ID | Description | Correlation |
|--|----------------|------------------|----------------|---------------|-----------------|---------------|----------|-------------|-------------|
|  |                |                  |                |               |                 |               | ABCC3    |             | 0.94820     |
|  |                |                  |                |               |                 |               | CCDC146  |             | 0.91265     |
|  |                |                  |                |               |                 |               | CLDN11   |             | 0.99046     |
|  |                |                  |                |               |                 |               | ETS2     |             | 0.96157     |
|  |                |                  |                |               |                 |               | EXTL1    |             | 0.87518     |
|  |                |                  |                |               |                 |               | MAN2C1   |             | 0.86529     |
|  |                |                  |                |               |                 |               | RABAC1   |             | 0.94874     |
|  |                |                  |                |               |                 |               | HSD11B1L |             | 0.94602     |
|  |                |                  |                |               |                 |               | AVPR2    |             | 0.94803     |
|  |                |                  |                |               |                 |               | CCDC18   |             | 0.70339     |
|  |                |                  |                |               |                 |               | DRP2     |             | 0.83252     |
|  |                |                  |                |               |                 |               | FHL2     |             | 0.93226     |
|  |                |                  |                |               |                 |               | GABRE    |             | 0.88882     |
|  |                |                  |                |               |                 |               | GFPT2    |             | 0.95650     |
|  |                |                  |                |               |                 |               | PPP1R13L |             | 0.96162     |
|  |                |                  |                |               |                 |               | SERPINF1 |             | 0.90442     |
|  |                |                  |                |               |                 |               | SNCAIP   |             | 0.93176     |
|  |                |                  |                |               |                 |               | TBC1D2   |             | 0.95299     |
|  |                |                  |                |               |                 |               | VENTX    |             | 0.58844     |
|  |                |                  |                |               |                 |               | XDH      |             | 0.91938     |
|  |                |                  |                |               |                 |               | ZNF423   |             | 0.88064     |
|  |                |                  |                |               |                 |               | ARHGAP23 |             | 0.98344     |
|  |                |                  |                |               |                 |               | CLIP2    |             | 0.88596     |
|  |                |                  |                |               |                 |               | MYOZ1    |             | 0.96718     |

|  | early_above_70 | early_aged_60_70 | early_below_55 | late_above_70 | late_aged_60_70 | late_below_55 | Probe ID | Descripti... | Correlation |
|--|----------------|------------------|----------------|---------------|-----------------|---------------|----------|--------------|-------------|
|  |                |                  |                |               |                 |               | ACAP1    |              | 0.93506     |
|  |                |                  |                |               |                 |               | ARHGAP28 |              | 0.96034     |
|  |                |                  |                |               |                 |               | ATM      |              | 0.98765     |
|  |                |                  |                |               |                 |               | ATP8A1   |              | 0.88047     |
|  |                |                  |                |               |                 |               | BCL9     |              | 0.98699     |
|  |                |                  |                |               |                 |               | CFLAR    |              | 0.99049     |
|  |                |                  |                |               |                 |               | CHD8     |              | 0.99599     |
|  |                |                  |                |               |                 |               | CORIN    |              | 0.97833     |
|  |                |                  |                |               |                 |               | CPEB2    |              | 0.90347     |
|  |                |                  |                |               |                 |               | DMXL2    |              | 0.98759     |
|  |                |                  |                |               |                 |               | FRYL     |              | 0.92996     |
|  |                |                  |                |               |                 |               | GON4L    |              | 0.93666     |
|  |                |                  |                |               |                 |               | HEATR6   |              | 0.97941     |
|  |                |                  |                |               |                 |               | HIVEP2   |              | 0.98487     |
|  |                |                  |                |               |                 |               | KIAA0556 |              | 0.97280     |
|  |                |                  |                |               |                 |               | MYO10    |              | 0.97055     |
|  |                |                  |                |               |                 |               | NR3C2    |              | 0.98609     |
|  |                |                  |                |               |                 |               | PARD3B   |              | 0.96037     |
|  |                |                  |                |               |                 |               | PARP4    |              | 0.94298     |
|  |                |                  |                |               |                 |               | RFC1     |              | 0.96088     |
|  |                |                  |                |               |                 |               | SAV1     |              | 0.93657     |
|  |                |                  |                |               |                 |               | SHPRH    |              | 0.99114     |
|  |                |                  |                |               |                 |               | SLC16A1  |              | 0.94328     |
|  |                |                  |                |               |                 |               | SLIT2    |              | 0.84987     |
|  |                |                  |                |               |                 |               | TLN1     |              | 0.99266     |
|  |                |                  |                |               |                 |               | TRIO     |              | 0.95261     |
|  |                |                  |                |               |                 |               | TRPM7    |              | 0.99290     |
|  |                |                  |                |               |                 |               | TTI1     |              | 0.94589     |
|  |                |                  |                |               |                 |               | TTLL7    |              | 0.97807     |
|  |                |                  |                |               |                 |               | TUBGCP4  |              | 0.94993     |
|  |                |                  |                |               |                 |               | USP30    |              | 0.98530     |
|  |                |                  |                |               |                 |               | RPRD2    |              | 0.93511     |
|  |                |                  |                |               |                 |               | SRRM2    |              | 0.95146     |
|  |                |                  |                |               |                 |               | CDK5R1   |              | 0.91229     |
|  |                |                  |                |               |                 |               | CHD2     |              | 0.91634     |
|  |                |                  |                |               |                 |               | SMARCA1  |              | 0.97154     |
|  |                |                  |                |               |                 |               | ARNT2    |              | 0.97141     |
|  |                |                  |                |               |                 |               | AP4E1    |              | 0.99559     |
|  |                |                  |                |               |                 |               | ARID1B   |              | 0.99170     |
|  |                |                  |                |               |                 |               | ASH1L    |              | 0.90483     |
|  |                |                  |                |               |                 |               | ATP9A    |              | 0.96433     |
|  |                |                  |                |               |                 |               | CEP85L   |              | 0.98142     |
|  |                |                  |                |               |                 |               | FAM168A  |              | 0.97271     |
|  |                |                  |                |               |                 |               | FOXN3    |              | 0.99160     |
|  |                |                  |                |               |                 |               | FRMD4B   |              | 0.99632     |
|  |                |                  |                |               |                 |               | HERC6    |              | 0.97999     |
|  |                |                  |                |               |                 |               | KCNN3    |              | 0.97173     |
|  |                |                  |                |               |                 |               | KDM5A    |              | 0.99820     |
|  |                |                  |                |               |                 |               | LARS2    |              | 0.97432     |
|  |                |                  |                |               |                 |               | LCA5     |              | 0.98884     |
|  |                |                  |                |               |                 |               | MAU2     |              | 0.95944     |
|  |                |                  |                |               |                 |               | PLOD2    |              | 0.95075     |
|  |                |                  |                |               |                 |               | PRKAB2   |              | 0.95152     |
|  |                |                  |                |               |                 |               | PTPRD    |              | 0.91324     |
|  |                |                  |                |               |                 |               | ROCK1    |              | 0.96216     |
|  |                |                  |                |               |                 |               | SASH1    |              | 0.97829     |
|  |                |                  |                |               |                 |               | SETBP1   |              | 0.98834     |
|  |                |                  |                |               |                 |               | SLC23A2  |              | 0.98427     |
|  |                |                  |                |               |                 |               | SMURF2   |              | 0.97456     |
|  |                |                  |                |               |                 |               | SP100    |              | 0.88368     |
|  |                |                  |                |               |                 |               | SYNJ2    |              | 0.99219     |
|  |                |                  |                |               |                 |               | TGFBR3   |              | 0.81630     |
|  |                |                  |                |               |                 |               | YLP1M1   |              | 0.96635     |
|  |                |                  |                |               |                 |               | ZFYVE9   |              | 0.98494     |
|  |                |                  |                |               |                 |               | ZNF141   |              | 0.98390     |
|  |                |                  |                |               |                 |               | ZNF436   |              | 0.97501     |
|  |                |                  |                |               |                 |               | ZNF45    |              | 0.96149     |
|  |                |                  |                |               |                 |               | BRWD1    |              | 0.99388     |
|  |                |                  |                |               |                 |               | KLF7     |              | 0.96990     |
|  |                |                  |                |               |                 |               | PRRC2A   |              | 0.98980     |
|  |                |                  |                |               |                 |               | ATXN1L   |              | 0.98312     |
|  |                |                  |                |               |                 |               | CDC42BPB |              | 0.96723     |
|  |                |                  |                |               |                 |               | DDX60L   |              | 0.98212     |
|  |                |                  |                |               |                 |               | DENND1C  |              | 0.95471     |
|  |                |                  |                |               |                 |               | ITGA1    |              | 0.97810     |
|  |                |                  |                |               |                 |               | MSMP     |              | 0.91072     |
|  |                |                  |                |               |                 |               | MYO18A   |              | 0.98577     |
|  |                |                  |                |               |                 |               | MYO1D    |              | 0.97430     |
|  |                |                  |                |               |                 |               | NF1      |              | 0.98327     |
|  |                |                  |                |               |                 |               | PPP2R2C  |              | 0.98889     |
|  |                |                  |                |               |                 |               | SLX4     |              | 0.98678     |
|  |                |                  |                |               |                 |               | SMCR8    |              | 0.97716     |
|  |                |                  |                |               |                 |               | TBL1XR1  |              | 0.99112     |
|  |                |                  |                |               |                 |               | TCP11L2  |              | 0.97590     |
|  |                |                  |                |               |                 |               | TMEM184C |              | 0.95149     |
|  |                |                  |                |               |                 |               | TXK      |              | 0.97243     |
|  |                |                  |                |               |                 |               | USP24    |              | 0.97063     |
|  |                |                  |                |               |                 |               | VANGL1   |              | 0.96961     |
|  |                |                  |                |               |                 |               | ZDHHC23  |              | 0.91650     |
|  |                |                  |                |               |                 |               | ZHX2     |              | 0.98144     |
|  |                |                  |                |               |                 |               | ZNF546   |              | 0.84065     |

|  | early_above_70 | early_aged_60_70 | early_below_55 | late_above_70 | late_aged_60_70 | late_below_55 | Probe ID | Descripti... | Correlation |
|--|----------------|------------------|----------------|---------------|-----------------|---------------|----------|--------------|-------------|
|  |                |                  |                |               |                 |               | ARRB2    |              | 0.78655     |
|  |                |                  |                |               |                 |               | BRCA1    |              | 0.97289     |
|  |                |                  |                |               |                 |               | BUB1B    |              | 0.99108     |
|  |                |                  |                |               |                 |               | CDCA8    |              | 0.99586     |
|  |                |                  |                |               |                 |               | CDKN2C   |              | 0.99288     |
|  |                |                  |                |               |                 |               | CDKN2D   |              | 0.99500     |
|  |                |                  |                |               |                 |               | CELSR3   |              | 0.99429     |
|  |                |                  |                |               |                 |               | CENPE    |              | 0.99330     |
|  |                |                  |                |               |                 |               | DEPDC1B  |              | 0.97914     |
|  |                |                  |                |               |                 |               | DIAPH3   |              | 0.97521     |
|  |                |                  |                |               |                 |               | EZH2     |              | 0.97931     |
|  |                |                  |                |               |                 |               | GLCC1    |              | 0.93682     |
|  |                |                  |                |               |                 |               | HELLS    |              | 0.97792     |
|  |                |                  |                |               |                 |               | KIF23    |              | 0.99695     |
|  |                |                  |                |               |                 |               | NCAPD2   |              | 0.97611     |
|  |                |                  |                |               |                 |               | PANK1    |              | 0.99055     |
|  |                |                  |                |               |                 |               | TMPO     |              | 0.97777     |
|  |                |                  |                |               |                 |               | DSCC1    |              | 0.97630     |
|  |                |                  |                |               |                 |               | SPC24    |              | 0.97627     |
|  |                |                  |                |               |                 |               | YWHAG    |              | 0.96990     |
|  |                |                  |                |               |                 |               | FANCA    |              | 0.99250     |
|  |                |                  |                |               |                 |               | KIF15    |              | 0.98175     |
|  |                |                  |                |               |                 |               | BMP6     |              | 0.98975     |
|  |                |                  |                |               |                 |               | BRIP1    |              | 0.98291     |
|  |                |                  |                |               |                 |               | CENPI    |              | 0.98442     |
|  |                |                  |                |               |                 |               | CLSPN    |              | 0.98015     |
|  |                |                  |                |               |                 |               | FBXO43   |              | 0.96091     |
|  |                |                  |                |               |                 |               | KIF11    |              | 0.98831     |
|  |                |                  |                |               |                 |               | KIF14    |              | 0.98838     |
|  |                |                  |                |               |                 |               | MCM4     |              | 0.98720     |
|  |                |                  |                |               |                 |               | MKI67    |              | 0.99030     |
|  |                |                  |                |               |                 |               | PLCE1    |              | 0.95388     |
|  |                |                  |                |               |                 |               | STK32B   |              | 0.84262     |
|  |                |                  |                |               |                 |               | ZWINT    |              | 0.97629     |
|  |                |                  |                |               |                 |               | KNTC1    |              | 0.99223     |
|  |                |                  |                |               |                 |               | BUB1     |              | 0.98954     |
|  |                |                  |                |               |                 |               | C1QC     |              | 0.84189     |
|  |                |                  |                |               |                 |               | CDC6     |              | 0.97665     |
|  |                |                  |                |               |                 |               | CDCA2    |              | 0.97606     |
|  |                |                  |                |               |                 |               | CENPP    |              | 0.94595     |
|  |                |                  |                |               |                 |               | FANCI    |              | 0.96086     |
|  |                |                  |                |               |                 |               | HNF1A    |              | 0.86804     |
|  |                |                  |                |               |                 |               | PBK      |              | 0.96713     |
|  |                |                  |                |               |                 |               | POC1A    |              | 0.96974     |
|  |                |                  |                |               |                 |               | PRC1     |              | 0.99813     |
|  |                |                  |                |               |                 |               | RMI2     |              | 0.99173     |
|  |                |                  |                |               |                 |               | TAGLN2   |              | 0.76566     |
|  |                |                  |                |               |                 |               | VGf      |              | 0.87423     |
|  |                |                  |                |               |                 |               | WDHD1    |              | 0.99497     |

|  | early_above_70 | early_aged_60_70 | early_below_55 | late_above_70 | late_aged_60_70 | late_below_55 | Probe ID | Description | Correlation |
|--|----------------|------------------|----------------|---------------|-----------------|---------------|----------|-------------|-------------|
|  |                |                  |                |               |                 |               | ART3     |             | 0.98361     |
|  |                |                  |                |               |                 |               | CALML4   |             | 0.84924     |
|  |                |                  |                |               |                 |               | CHGB     |             | 0.79496     |
|  |                |                  |                |               |                 |               | GALNT5   |             | 0.87776     |
|  |                |                  |                |               |                 |               | IGSF11   |             | 0.85025     |
|  |                |                  |                |               |                 |               | KCNQ2    |             | 0.91980     |
|  |                |                  |                |               |                 |               | LRP2     |             | 0.85586     |
|  |                |                  |                |               |                 |               | PTH2R    |             | 0.95726     |
|  |                |                  |                |               |                 |               | SLC35F4  |             | 0.86084     |
|  |                |                  |                |               |                 |               | TDRD1    |             | 0.92364     |
|  |                |                  |                |               |                 |               | INSM1    |             | 0.85930     |
|  |                |                  |                |               |                 |               | ORM2     |             | 0.92075     |
|  |                |                  |                |               |                 |               | SLC35G1  |             | 0.74056     |
|  |                |                  |                |               |                 |               | FAM174A  |             | 0.91005     |
|  |                |                  |                |               |                 |               | GDF5     |             | 0.94375     |
|  |                |                  |                |               |                 |               | INSIG1   |             | 0.92463     |
|  |                |                  |                |               |                 |               | MSMO1    |             | 0.83299     |

|  | early_above_70 | early_aged_60_70 | early_below_55 | late_above_70 | late_aged_60_70 | late_below_55 | Probe ID | Description | Correlation |
|--|----------------|------------------|----------------|---------------|-----------------|---------------|----------|-------------|-------------|
|  |                |                  |                |               |                 |               | C1orf112 |             | 0.98812     |
|  |                |                  |                |               |                 |               | KLHL7    |             | 0.96741     |
|  |                |                  |                |               |                 |               | MRI1     |             | 0.90529     |
|  |                |                  |                |               |                 |               | MSH2     |             | 0.97974     |
|  |                |                  |                |               |                 |               | TSPAN13  |             | 0.97220     |
|  |                |                  |                |               |                 |               | YEATS4   |             | 0.96962     |
|  |                |                  |                |               |                 |               | ZNF92    |             | 0.96544     |
|  |                |                  |                |               |                 |               | ZFP62    |             | 0.95676     |
|  |                |                  |                |               |                 |               | CEP72    |             | 0.94986     |
|  |                |                  |                |               |                 |               | FBXO5    |             | 0.95955     |
|  |                |                  |                |               |                 |               | GPSM2    |             | 0.98207     |
|  |                |                  |                |               |                 |               | INHA     |             | 0.81166     |
|  |                |                  |                |               |                 |               | RNF138   |             | 0.98877     |
|  |                |                  |                |               |                 |               | TLE4     |             | 0.91977     |
|  |                |                  |                |               |                 |               | PSMD3    |             | 0.93880     |
|  |                |                  |                |               |                 |               | ZNF696   |             | 0.95860     |
|  |                |                  |                |               |                 |               | AP3S1    |             | 0.90105     |
|  |                |                  |                |               |                 |               | CMTM8    |             | 0.95672     |
|  |                |                  |                |               |                 |               | MRPL13   |             | 0.98276     |
|  |                |                  |                |               |                 |               | RUVBL1   |             | 0.98862     |
|  |                |                  |                |               |                 |               | TRIM59   |             | 0.98393     |
|  |                |                  |                |               |                 |               | UNC      |             | 0.98469     |
|  |                |                  |                |               |                 |               | ZNF138   |             | 0.98489     |

|  | early_above_70 | early_aged_60_70 | early_below_55 | late_above_70 | late_aged_60_70 | late_below_55 | Probe ID | Description | Correlation |
|--|----------------|------------------|----------------|---------------|-----------------|---------------|----------|-------------|-------------|
|  |                |                  |                |               |                 |               | BCL11A   |             | 0.94277     |
|  |                |                  |                |               |                 |               | DGUOK    |             | 0.91850     |
|  |                |                  |                |               |                 |               | NOG      |             | 0.40956     |
|  |                |                  |                |               |                 |               | ACSM3    |             | 0.96119     |
|  |                |                  |                |               |                 |               | CDH19    |             | 0.83402     |
|  |                |                  |                |               |                 |               | DPP6     |             | 0.83593     |
|  |                |                  |                |               |                 |               | EBP      |             | 0.95150     |
|  |                |                  |                |               |                 |               | FBXO15   |             | 0.96582     |
|  |                |                  |                |               |                 |               | GPM6A    |             | 0.97578     |
|  |                |                  |                |               |                 |               | LRRC17   |             | 0.93343     |
|  |                |                  |                |               |                 |               | RSPH4A   |             | 0.98625     |
|  |                |                  |                |               |                 |               | SERP2    |             | 0.95917     |
|  |                |                  |                |               |                 |               | SLC24A2  |             | 0.80928     |
|  |                |                  |                |               |                 |               | ZC3H12B  |             | 0.94328     |
|  |                |                  |                |               |                 |               | ZC4H2    |             | 0.98573     |
|  |                |                  |                |               |                 |               | ACOT11   |             | 0.96411     |
|  |                |                  |                |               |                 |               | CHMP4A   |             | 0.89908     |
|  |                |                  |                |               |                 |               | CA9      |             | 0.82858     |
|  |                |                  |                |               |                 |               | COMMD6   |             | 0.95352     |
|  |                |                  |                |               |                 |               | CYP4F12  |             | 0.86358     |
|  |                |                  |                |               |                 |               | HMGH3    |             | 0.89588     |
|  |                |                  |                |               |                 |               | TRAPPC6A |             | 0.93463     |
|  |                |                  |                |               |                 |               | ULBP3    |             | 0.83527     |
|  |                |                  |                |               |                 |               | VSNL1    |             | 0.83544     |
|  |                |                  |                |               |                 |               | YBX2     |             | 0.78646     |
|  |                |                  |                |               |                 |               | ZBTB7C   |             | 0.95364     |

|  | early_above_70 | early_aged_60_70 | early_below_55 | late_above_70 | late_aged_60_70 | late_below_55 | Probe ID | Description | Correlation |
|--|----------------|------------------|----------------|---------------|-----------------|---------------|----------|-------------|-------------|
|  |                |                  |                |               |                 |               | ADAMTS16 |             | 0.96086     |
|  |                |                  |                |               |                 |               | APBA1    |             | 0.96146     |
|  |                |                  |                |               |                 |               | CTTNBP2  |             | 0.83061     |
|  |                |                  |                |               |                 |               | MCF2L2   |             | 0.92388     |
|  |                |                  |                |               |                 |               | MYH3     |             | 0.73826     |
|  |                |                  |                |               |                 |               | NAALAD2  |             | 0.95200     |

|  | early_above_70 | early_aged_60_70 | early_below_55 | late_above_70 | late_aged_60_70 | late_below_55 | Probe ID | Description | Correlation |
|--|----------------|------------------|----------------|---------------|-----------------|---------------|----------|-------------|-------------|
|  |                |                  |                |               |                 |               | ACVR1C   |             | 0.96540     |
|  |                |                  |                |               |                 |               | RERGL    |             | 0.96540     |

|  | early_above_70 | early_aged_60_70 | early_below_55 | late_above_70 | late_aged_60_70 | late_below_55 | Probe ID | Description | Correlation |
|--|----------------|------------------|----------------|---------------|-----------------|---------------|----------|-------------|-------------|
|  |                |                  |                |               |                 |               | ABHD10   |             | 0.97542     |
|  |                |                  |                |               |                 |               | ERBB2    |             | 0.94157     |
|  |                |                  |                |               |                 |               | LGALS3   |             | 0.84689     |
|  |                |                  |                |               |                 |               | NR1I2    |             | 0.96782     |
|  |                |                  |                |               |                 |               | PPP1R15A |             | 0.94766     |
|  |                |                  |                |               |                 |               | SLC26A8  |             | 0.78801     |
|  |                |                  |                |               |                 |               | C11orf21 |             | 0.96786     |
|  |                |                  |                |               |                 |               | CR2      |             | 0.96847     |
|  |                |                  |                |               |                 |               | GNG13    |             | 0.91322     |
|  |                |                  |                |               |                 |               | HAPLN1   |             | 0.95261     |
|  |                |                  |                |               |                 |               | IL12RB2  |             | 0.95482     |
|  |                |                  |                |               |                 |               | LMX1B    |             | 0.81211     |
|  |                |                  |                |               |                 |               | NACC2    |             | 0.83560     |
|  |                |                  |                |               |                 |               | PAK3     |             | 0.96047     |
|  |                |                  |                |               |                 |               | RSPO4    |             | 0.87457     |
|  |                |                  |                |               |                 |               | SIRPB1   |             | 0.79185     |
|  |                |                  |                |               |                 |               | SLC10A6  |             | 0.96499     |
|  |                |                  |                |               |                 |               | SLITRK3  |             | 0.96216     |
|  |                |                  |                |               |                 |               | SPA17    |             | 0.83091     |
|  |                |                  |                |               |                 |               | TMEM236  |             | 0.95572     |
|  |                |                  |                |               |                 |               | TNFAIP8  |             | 0.83394     |
|  |                |                  |                |               |                 |               | C17orf58 |             | 0.94922     |
|  |                |                  |                |               |                 |               | GADD45B  |             | 0.87654     |
|  |                |                  |                |               |                 |               | SLC2A3   |             | 0.91406     |
|  |                |                  |                |               |                 |               | CDC25A   |             | 0.80769     |
|  |                |                  |                |               |                 |               | IKZF3    |             | 0.93941     |
|  |                |                  |                |               |                 |               | KCTD14   |             | 0.95566     |
|  |                |                  |                |               |                 |               | LNP1     |             | 0.65351     |
|  |                |                  |                |               |                 |               | ODF3L1   |             | 0.96806     |
|  |                |                  |                |               |                 |               | OTX1     |             | 0.97181     |
|  |                |                  |                |               |                 |               | RHOF     |             | 0.57791     |
|  |                |                  |                |               |                 |               | TPRN     |             | 0.58521     |
|  |                |                  |                |               |                 |               | ZNF683   |             | 0.64975     |

|  | early_above_70 | early_aged_60_70 | early_below_55 | late_above_70 | late_aged_60_70 | late_below_55 | Probe ID | Description | Correlation |
|--|----------------|------------------|----------------|---------------|-----------------|---------------|----------|-------------|-------------|
|  |                |                  |                |               |                 |               | INPP1    |             | 0.97566     |
|  |                |                  |                |               |                 |               | MCOLN2   |             | 0.97445     |
|  |                |                  |                |               |                 |               | SLC8A2   |             | 0.98914     |
|  |                |                  |                |               |                 |               | SULT2B1  |             | 0.90371     |
|  |                |                  |                |               |                 |               | ANXA1    |             | 0.97921     |
|  |                |                  |                |               |                 |               | CDH26    |             | 0.92316     |
|  |                |                  |                |               |                 |               | DLEC1    |             | 0.95738     |
|  |                |                  |                |               |                 |               | DTNA     |             | 0.95567     |
|  |                |                  |                |               |                 |               | LDHB     |             | 0.96977     |
|  |                |                  |                |               |                 |               | NINL     |             | 0.95068     |
|  |                |                  |                |               |                 |               | PTGER3   |             | 0.93564     |
|  |                |                  |                |               |                 |               | TIMP4    |             | 0.98789     |
|  |                |                  |                |               |                 |               | FTCD     |             | 0.92357     |
|  |                |                  |                |               |                 |               | REG4     |             | 0.91695     |
|  |                |                  |                |               |                 |               | TCAP     |             | 0.93719     |

|  | early_above_70 | early_aged_60_70 | early_below_55 | late_above_70 | late_aged_60_70 | late_below_55 | Probe ID | Description | Correlation |
|--|----------------|------------------|----------------|---------------|-----------------|---------------|----------|-------------|-------------|
|  |                |                  |                |               |                 |               | BPHL     |             | 0.86642     |
|  |                |                  |                |               |                 |               | CDHR2    |             | 0.83313     |
|  |                |                  |                |               |                 |               | NLN      |             | 0.89504     |
|  |                |                  |                |               |                 |               | PRIM2    |             | 0.95247     |
|  |                |                  |                |               |                 |               | SCO1     |             | 0.86625     |
|  |                |                  |                |               |                 |               | TRERF1   |             | 0.82986     |
|  |                |                  |                |               |                 |               | BNC2     |             | 0.93760     |
|  |                |                  |                |               |                 |               | ATP6V0D2 |             | 0.90474     |
|  |                |                  |                |               |                 |               | BCHE     |             | 0.87656     |
|  |                |                  |                |               |                 |               | CRB2     |             | 0.83166     |
|  |                |                  |                |               |                 |               | CTH      |             | 0.77062     |
|  |                |                  |                |               |                 |               | CYSLTR2  |             | 0.92904     |
|  |                |                  |                |               |                 |               | HSD17B3  |             | 0.83520     |
|  |                |                  |                |               |                 |               | MS4A1    |             | 0.95562     |
|  |                |                  |                |               |                 |               | MTAP     |             | 0.81936     |
|  |                |                  |                |               |                 |               | SLC6A12  |             | 0.90818     |
|  |                |                  |                |               |                 |               | ZIC2     |             | 0.71065     |
|  |                |                  |                |               |                 |               | SPATC1   |             | 0.94945     |
|  |                |                  |                |               |                 |               | ZNF460   |             | 0.89935     |
|  |                |                  |                |               |                 |               | DEPDC4   |             | 0.89057     |
|  |                |                  |                |               |                 |               | GSTA4    |             | 0.88065     |
|  |                |                  |                |               |                 |               | NPNT     |             | 0.95232     |
|  |                |                  |                |               |                 |               | PSAT1    |             | 0.84423     |
|  |                |                  |                |               |                 |               | UGT8     |             | 0.88943     |

|  | early_above_70 | early_aged_60_70 | early_below_55 | late_above_70 | late_aged_60_70 | late_below_55 | Probe ID | Description | Correlation |
|--|----------------|------------------|----------------|---------------|-----------------|---------------|----------|-------------|-------------|
|  |                |                  |                |               |                 |               | ACRBP    |             | 0.96915     |
|  |                |                  |                |               |                 |               | ARRB1    |             | 0.88587     |
|  |                |                  |                |               |                 |               | B4GALNT3 |             | 0.95133     |
|  |                |                  |                |               |                 |               | BHMT     |             | 0.93543     |
|  |                |                  |                |               |                 |               | GRHL3    |             | 0.99619     |
|  |                |                  |                |               |                 |               | SRD5A1   |             | 0.92445     |
|  |                |                  |                |               |                 |               | NUAK2    |             | 0.95248     |
|  |                |                  |                |               |                 |               | ST3GAL5  |             | 0.99347     |
|  |                |                  |                |               |                 |               | MTRNR2L1 |             | 0.92097     |
|  |                |                  |                |               |                 |               | CCDC77   |             | 0.92169     |
|  |                |                  |                |               |                 |               | HS3ST1   |             | 0.95906     |
|  |                |                  |                |               |                 |               | IGFLR1   |             | 0.98587     |
|  |                |                  |                |               |                 |               | TPCN2    |             | 0.97624     |

|  | early_above_70 | early_aged_60_70 | early_below_55 | late_above_70 | late_aged_60_70 | late_below_55 | Probe ID | Description | Correlation |
|--|----------------|------------------|----------------|---------------|-----------------|---------------|----------|-------------|-------------|
|  |                |                  |                |               |                 |               | CANX     |             | 0.98567     |
|  |                |                  |                |               |                 |               | CD46     |             | 0.97429     |
|  |                |                  |                |               |                 |               | COG6     |             | 0.98468     |
|  |                |                  |                |               |                 |               | ELMO2    |             | 0.98949     |
|  |                |                  |                |               |                 |               | FAM135A  |             | 0.98148     |
|  |                |                  |                |               |                 |               | FNIP2    |             | 0.95873     |
|  |                |                  |                |               |                 |               | MED12L   |             | 0.94613     |
|  |                |                  |                |               |                 |               | MTUS1    |             | 0.98912     |
|  |                |                  |                |               |                 |               | PRKCA    |             | 0.96458     |
|  |                |                  |                |               |                 |               | RGS17    |             | 0.96771     |
|  |                |                  |                |               |                 |               | RNF141   |             | 0.99022     |
|  |                |                  |                |               |                 |               | SLC12A2  |             | 0.97495     |
|  |                |                  |                |               |                 |               | SLC17A5  |             | 0.98823     |
|  |                |                  |                |               |                 |               | TAOK3    |             | 0.92650     |
|  |                |                  |                |               |                 |               | HELQ     |             | 0.88872     |
|  |                |                  |                |               |                 |               | TAF8     |             | 0.97389     |
|  |                |                  |                |               |                 |               | WWOX     |             | 0.98736     |
|  |                |                  |                |               |                 |               | ARHGAP6  |             | 0.93596     |
|  |                |                  |                |               |                 |               | CHSY1    |             | 0.99666     |
|  |                |                  |                |               |                 |               | CORO2A   |             | 0.98368     |
|  |                |                  |                |               |                 |               | CWH43    |             | 0.98683     |
|  |                |                  |                |               |                 |               | ELOVL5   |             | 0.95515     |
|  |                |                  |                |               |                 |               | ENOX1    |             | 0.97902     |
|  |                |                  |                |               |                 |               | FAXC     |             | 0.92221     |
|  |                |                  |                |               |                 |               | NUS1     |             | 0.96695     |
|  |                |                  |                |               |                 |               | PCYT1B   |             | 0.87752     |
|  |                |                  |                |               |                 |               | PEX12    |             | 0.97347     |
|  |                |                  |                |               |                 |               | ST3GAL6  |             | 0.94656     |
|  |                |                  |                |               |                 |               | TMEM181  |             | 0.94783     |
|  |                |                  |                |               |                 |               | TOM1L1   |             | 0.98706     |
|  |                |                  |                |               |                 |               | USP43    |             | 0.96700     |
|  |                |                  |                |               |                 |               | CPNE4    |             | 0.98232     |
|  |                |                  |                |               |                 |               | TIGD2    |             | 0.97450     |
|  |                |                  |                |               |                 |               | UBE2J1   |             | 0.91137     |
|  |                |                  |                |               |                 |               | OMA1     |             | 0.96070     |
|  |                |                  |                |               |                 |               | CCDC68   |             | 0.96932     |
|  |                |                  |                |               |                 |               | MMADHC   |             | 0.96712     |
|  |                |                  |                |               |                 |               | NT5DC1   |             | 0.99574     |



|  | early_above_70 | early_aged_60_70 | early_below_55 | late_above_70 | late_aged_60_70 | late_below_55 | Probe ID | Description | Correlation |
|--|----------------|------------------|----------------|---------------|-----------------|---------------|----------|-------------|-------------|
|  |                |                  |                |               |                 |               | C22orf23 |             | 0.95614     |
|  |                |                  |                |               |                 |               | CDK6     |             | 0.97618     |
|  |                |                  |                |               |                 |               | GDF15    |             | 0.97027     |
|  |                |                  |                |               |                 |               | NFIB     |             | 0.97077     |
|  |                |                  |                |               |                 |               | PASK     |             | 0.95547     |
|  |                |                  |                |               |                 |               | PHLPP1   |             | 0.95992     |
|  |                |                  |                |               |                 |               | RNF43    |             | 0.88607     |
|  |                |                  |                |               |                 |               | RSPO2    |             | 0.96641     |
|  |                |                  |                |               |                 |               | SLC43A1  |             | 0.93713     |
|  |                |                  |                |               |                 |               | TBX3     |             | 0.97804     |
|  |                |                  |                |               |                 |               | WWC1     |             | 0.96837     |
|  |                |                  |                |               |                 |               | C15orf48 |             | 0.93174     |
|  |                |                  |                |               |                 |               | ARSG     |             | 0.98512     |
|  |                |                  |                |               |                 |               | CARD10   |             | 0.98523     |
|  |                |                  |                |               |                 |               | FUCA2    |             | 0.97496     |
|  |                |                  |                |               |                 |               | HSD17B6  |             | 0.99212     |
|  |                |                  |                |               |                 |               | MAPK4    |             | 0.89744     |
|  |                |                  |                |               |                 |               | PALMD    |             | 0.98351     |
|  |                |                  |                |               |                 |               | SLC7A1   |             | 0.95034     |
|  |                |                  |                |               |                 |               | SV2C     |             | 0.81136     |
|  |                |                  |                |               |                 |               | TCEA3    |             | 0.95549     |
|  |                |                  |                |               |                 |               | DEF6     |             | 0.94937     |
|  |                |                  |                |               |                 |               | KBTBD11  |             | 0.93657     |
|  |                |                  |                |               |                 |               | SNTG2    |             | 0.99336     |
|  |                |                  |                |               |                 |               | ARHGEF10 |             | 0.96833     |
|  |                |                  |                |               |                 |               | CADM1    |             | 0.96478     |
|  |                |                  |                |               |                 |               | CHD7     |             | 0.93354     |
|  |                |                  |                |               |                 |               | CYP4V2   |             | 0.89698     |
|  |                |                  |                |               |                 |               | FCRLB    |             | 0.93251     |

|  | early_above_70 | early_aged_60_70 | early_below_55 | late_above_70 | late_aged_60_70 | late_below_55 | Probe ID    | Description | Correlation |
|--|----------------|------------------|----------------|---------------|-----------------|---------------|-------------|-------------|-------------|
|  |                |                  |                |               |                 |               | AGFG2       |             | 0.95601     |
|  |                |                  |                |               |                 |               | CASC1       |             | 0.98953     |
|  |                |                  |                |               |                 |               | FOXP2       |             | 0.91996     |
|  |                |                  |                |               |                 |               | GCHFR       |             | 0.82785     |
|  |                |                  |                |               |                 |               | GNPNAT1     |             | 0.93652     |
|  |                |                  |                |               |                 |               | MCPH1       |             | 0.96553     |
|  |                |                  |                |               |                 |               | MGST1       |             | 0.98637     |
|  |                |                  |                |               |                 |               | PNKD        |             | 0.91006     |
|  |                |                  |                |               |                 |               | RBFA        |             | 0.97103     |
|  |                |                  |                |               |                 |               | WDR93       |             | 0.97719     |
|  |                |                  |                |               |                 |               | KCNH6       |             | 0.97047     |
|  |                |                  |                |               |                 |               | BAIAP2      |             | 0.95643     |
|  |                |                  |                |               |                 |               | CITED2      |             | 0.89553     |
|  |                |                  |                |               |                 |               | CUEDC1      |             | 0.92260     |
|  |                |                  |                |               |                 |               | HMG20B      |             | 0.97343     |
|  |                |                  |                |               |                 |               | LONRF1      |             | 0.94855     |
|  |                |                  |                |               |                 |               | MIPEP       |             | 0.92458     |
|  |                |                  |                |               |                 |               | RAMP1       |             | 0.93669     |
|  |                |                  |                |               |                 |               | RLN1        |             | 0.96963     |
|  |                |                  |                |               |                 |               | SAT2        |             | 0.96523     |
|  |                |                  |                |               |                 |               | SEC14L5     |             | 0.91858     |
|  |                |                  |                |               |                 |               | SMS         |             | 0.99768     |
|  |                |                  |                |               |                 |               | ST6GALNA... |             | 0.96452     |
|  |                |                  |                |               |                 |               | TNFRSF19    |             | 0.94906     |
|  |                |                  |                |               |                 |               | TUSC3       |             | 0.94259     |
|  |                |                  |                |               |                 |               | WNT16       |             | 0.95357     |
|  |                |                  |                |               |                 |               | C2orf72     |             | 0.97610     |
|  |                |                  |                |               |                 |               | PAX5        |             | 0.97027     |
|  |                |                  |                |               |                 |               | ANXA4       |             | 0.97683     |
|  |                |                  |                |               |                 |               | ELMO3       |             | 0.93473     |
|  |                |                  |                |               |                 |               | FBXL8       |             | 0.92132     |
|  |                |                  |                |               |                 |               | NUDT4       |             | 0.89019     |
|  |                |                  |                |               |                 |               | PGAP3       |             | 0.87980     |
|  |                |                  |                |               |                 |               | PODXL2      |             | 0.97691     |
|  |                |                  |                |               |                 |               | RPH3AL      |             | 0.92305     |
|  |                |                  |                |               |                 |               | SERINC2     |             | 0.86413     |
|  |                |                  |                |               |                 |               | ZNF589      |             | 0.94550     |

|  | early_above_70 | early_aged_60_70 | early_below_55 | late_above_70 | late_aged_60_70 | late_below_55 | Probe ID | Description | Correlation |
|--|----------------|------------------|----------------|---------------|-----------------|---------------|----------|-------------|-------------|
|  |                |                  |                |               |                 |               | BEST4    |             | 0.94733     |
|  |                |                  |                |               |                 |               | DEPDC7   |             | 0.89907     |
|  |                |                  |                |               |                 |               | GPRC5A   |             | 0.39122     |
|  |                |                  |                |               |                 |               | PTPRO    |             | 0.91259     |
|  |                |                  |                |               |                 |               | SLC17A7  |             | 0.85321     |
|  |                |                  |                |               |                 |               | CACNG8   |             | 0.96822     |
|  |                |                  |                |               |                 |               | CEACAM21 |             | 0.94137     |
|  |                |                  |                |               |                 |               | FGF14    |             | 0.99372     |
|  |                |                  |                |               |                 |               | MORN3    |             | 0.96852     |
|  |                |                  |                |               |                 |               | POF1B    |             | 0.85548     |
|  |                |                  |                |               |                 |               | SCG3     |             | 0.97352     |
|  |                |                  |                |               |                 |               | TAF7L    |             | 0.91675     |
|  |                |                  |                |               |                 |               | AMHR2    |             | 0.95876     |
|  |                |                  |                |               |                 |               | FOXC2    |             | 0.84648     |
|  |                |                  |                |               |                 |               | PLAUR    |             | 0.30576     |
|  |                |                  |                |               |                 |               | TMEM150B |             | 0.85651     |

|  | early_above_70 | early_aged_60_70 | early_below_55 | late_above_70 | late_aged_60_70 | late_below_55 | Probe ID | Description | Correlation |
|--|----------------|------------------|----------------|---------------|-----------------|---------------|----------|-------------|-------------|
|  |                |                  |                |               |                 |               | IFT20    |             | 0.87799     |
|  |                |                  |                |               |                 |               | THSD7A   |             | 0.93952     |
|  |                |                  |                |               |                 |               | ANKRD10  |             | 0.96844     |
|  |                |                  |                |               |                 |               | BMP7     |             | 0.95281     |
|  |                |                  |                |               |                 |               | DNASE2B  |             | 0.87519     |
|  |                |                  |                |               |                 |               | FBN2     |             | 0.97413     |
|  |                |                  |                |               |                 |               | FGF13    |             | 0.98512     |
|  |                |                  |                |               |                 |               | IRAK1BP1 |             | 0.92116     |
|  |                |                  |                |               |                 |               | MMEL1    |             | 0.95310     |
|  |                |                  |                |               |                 |               | NCALD    |             | 0.93638     |
|  |                |                  |                |               |                 |               | NKAIN1   |             | 0.97879     |
|  |                |                  |                |               |                 |               | NTHL1    |             | 0.82408     |
|  |                |                  |                |               |                 |               | PYCR2    |             | 0.87798     |
|  |                |                  |                |               |                 |               | THPO     |             | 0.88756     |
|  |                |                  |                |               |                 |               | TXNIP    |             | 0.94893     |
|  |                |                  |                |               |                 |               | ELAVL3   |             | 0.79018     |
|  |                |                  |                |               |                 |               | ATG9B    |             | 0.94275     |
|  |                |                  |                |               |                 |               | C1orf131 |             | 0.94046     |
|  |                |                  |                |               |                 |               | CCDC40   |             | 0.91265     |
|  |                |                  |                |               |                 |               | GAPDHS   |             | 0.86619     |
|  |                |                  |                |               |                 |               | MTHFD2L  |             | 0.93680     |
|  |                |                  |                |               |                 |               | PNISR    |             | 0.95578     |
|  |                |                  |                |               |                 |               | SH3RF3   |             | 0.92860     |
|  |                |                  |                |               |                 |               | SLC25A45 |             | 0.96428     |
|  |                |                  |                |               |                 |               | TUBD1    |             | 0.97933     |
|  |                |                  |                |               |                 |               | WNK2     |             | 0.96453     |

|  | early_above_70 | early_aged_60_70 | early_below_55 | late_above_70 | late_aged_60_70 | late_below_55 | Probe ID | Description | Correlation |
|--|----------------|------------------|----------------|---------------|-----------------|---------------|----------|-------------|-------------|
|  |                |                  |                |               |                 |               | CACNA1A  |             | 0.76508     |
|  |                |                  |                |               |                 |               | CCR10    |             | 0.91040     |
|  |                |                  |                |               |                 |               | MEOX2    |             | 0.93380     |
|  |                |                  |                |               |                 |               | TMEM91   |             | 0.98133     |
|  |                |                  |                |               |                 |               | MC1R     |             | 0.98484     |
|  |                |                  |                |               |                 |               | CLASRP   |             | 0.94668     |
|  |                |                  |                |               |                 |               | DCST2    |             | 0.98622     |
|  |                |                  |                |               |                 |               | NFATC4   |             | 0.96119     |
|  |                |                  |                |               |                 |               | RNF207   |             | 0.93743     |

|  | early_above_70 | early_aged_60_70 | early_below_55 | late_above_70 | late_aged_60_70 | late_below_55 | Probe ID | Description | Correlation |
|--|----------------|------------------|----------------|---------------|-----------------|---------------|----------|-------------|-------------|
|  |                |                  |                |               |                 |               | COX6B1   |             | 0.89058     |
|  |                |                  |                |               |                 |               | POU2AF1  |             | 0.90751     |
|  |                |                  |                |               |                 |               | RAB34    |             | 0.97289     |
|  |                |                  |                |               |                 |               | CCDC81   |             | 0.89059     |
|  |                |                  |                |               |                 |               | CDHR3    |             | 0.60352     |
|  |                |                  |                |               |                 |               | TNNC1    |             | 0.78721     |
|  |                |                  |                |               |                 |               | VTCN1    |             | 0.74535     |
|  |                |                  |                |               |                 |               | CHCHD10  |             | 0.91294     |
|  |                |                  |                |               |                 |               | MYL6B    |             | 0.89705     |
|  |                |                  |                |               |                 |               | ANXA2    |             | 0.85095     |
|  |                |                  |                |               |                 |               | IL17RE   |             | 0.87962     |
|  |                |                  |                |               |                 |               | ITPKA    |             | 0.84867     |
|  |                |                  |                |               |                 |               | MRPL55   |             | 0.95412     |
|  |                |                  |                |               |                 |               | SGK2     |             | 0.60352     |

|  | early_above_70 | early_aged_60_70 | early_below_55 | late_above_70 | late_aged_60_70 | late_below_55 | Probe ID | Description | Correlation |
|--|----------------|------------------|----------------|---------------|-----------------|---------------|----------|-------------|-------------|
|  |                |                  |                |               |                 |               | BTG1     |             | 0.97860     |
|  |                |                  |                |               |                 |               | CLK1     |             | 0.93548     |
|  |                |                  |                |               |                 |               | DDC      |             | 0.97334     |
|  |                |                  |                |               |                 |               | FAM76B   |             | 0.96368     |
|  |                |                  |                |               |                 |               | NAA40    |             | 0.97881     |
|  |                |                  |                |               |                 |               | PTK6     |             | 0.98230     |
|  |                |                  |                |               |                 |               | RGS3     |             | 0.98328     |
|  |                |                  |                |               |                 |               | SLC4A8   |             | 0.92140     |
|  |                |                  |                |               |                 |               | TDG      |             | 0.94269     |
|  |                |                  |                |               |                 |               | SUN1     |             | 0.94095     |
|  |                |                  |                |               |                 |               | LRRC39   |             | 0.94178     |
|  |                |                  |                |               |                 |               | PNN      |             | 0.98763     |
|  |                |                  |                |               |                 |               | PPFIA2   |             | 0.95536     |
|  |                |                  |                |               |                 |               | TRMT112  |             | 0.90915     |
|  |                |                  |                |               |                 |               | LHX4     |             | 0.75446     |
|  |                |                  |                |               |                 |               | PSMC6    |             | 0.94847     |
|  |                |                  |                |               |                 |               | SS18L2   |             | 0.88775     |
|  |                |                  |                |               |                 |               | TRIM52   |             | 0.93543     |
|  |                |                  |                |               |                 |               | ZMYND8   |             | 0.96577     |
|  |                |                  |                |               |                 |               | ZNF438   |             | 0.97404     |

|  | early_above_70 | early_aged_60_70 | early_below_55 | late_above_70 | late_aged_60_70 | late_below_55 | Probe ID | Description | Correlation |
|--|----------------|------------------|----------------|---------------|-----------------|---------------|----------|-------------|-------------|
|  |                |                  |                |               |                 |               | FANCL    |             | 0.94115     |
|  |                |                  |                |               |                 |               | TSPAN8   |             | 0.87419     |
|  |                |                  |                |               |                 |               | ZNF385B  |             | 0.95808     |
|  |                |                  |                |               |                 |               | MARCKSL1 |             | 0.94743     |
|  |                |                  |                |               |                 |               | AFF2     |             | 0.87345     |
|  |                |                  |                |               |                 |               | CDH15    |             | 0.86273     |
|  |                |                  |                |               |                 |               | COX7A2   |             | 0.88777     |
|  |                |                  |                |               |                 |               | ELOVL4   |             | 0.89611     |
|  |                |                  |                |               |                 |               | FRA10AC1 |             | 0.95470     |
|  |                |                  |                |               |                 |               | IMMP1L   |             | 0.89061     |
|  |                |                  |                |               |                 |               | KCNE4    |             | 0.92505     |
|  |                |                  |                |               |                 |               | LOX      |             | 0.96778     |
|  |                |                  |                |               |                 |               | PLA1A    |             | 0.97021     |
|  |                |                  |                |               |                 |               | PLP1     |             | 0.82990     |
|  |                |                  |                |               |                 |               | SRSF12   |             | 0.91484     |
|  |                |                  |                |               |                 |               | SYCP2L   |             | 0.96661     |
|  |                |                  |                |               |                 |               | VLDLR    |             | 0.93385     |
|  |                |                  |                |               |                 |               | HSD11B2  |             | 0.88225     |
|  |                |                  |                |               |                 |               | ZNF547   |             | 0.93500     |
|  |                |                  |                |               |                 |               | ZNF563   |             | 0.93303     |
|  |                |                  |                |               |                 |               | CAPN5    |             | 0.78230     |
|  |                |                  |                |               |                 |               | CCDC138  |             | 0.88162     |
|  |                |                  |                |               |                 |               | CDH4     |             | 0.96307     |
|  |                |                  |                |               |                 |               | FRMD5    |             | 0.92932     |
|  |                |                  |                |               |                 |               | LEKR1    |             | 0.94399     |
|  |                |                  |                |               |                 |               | MYCBP    |             | 0.97829     |
|  |                |                  |                |               |                 |               | NEU1     |             | 0.98498     |
|  |                |                  |                |               |                 |               | SYNCRIP  |             | 0.88078     |

|  | early_above_70 | early_aged_60_70 | early_below_55 | late_above_70 | late_aged_60_70 | late_below_55 | Probe ID | Description | Correlation |
|--|----------------|------------------|----------------|---------------|-----------------|---------------|----------|-------------|-------------|
|  |                |                  |                |               |                 |               | BAZ2A    |             | 0.92835     |
|  |                |                  |                |               |                 |               | GDAP1    |             | 0.98522     |
|  |                |                  |                |               |                 |               | HEATR1   |             | 0.96907     |
|  |                |                  |                |               |                 |               | LATS2    |             | 0.87939     |
|  |                |                  |                |               |                 |               | MAN1A1   |             | 0.98639     |
|  |                |                  |                |               |                 |               | NAF1     |             | 0.97158     |
|  |                |                  |                |               |                 |               | RAD50    |             | 0.97507     |
|  |                |                  |                |               |                 |               | RASA2    |             | 0.99320     |
|  |                |                  |                |               |                 |               | XPO4     |             | 0.98939     |
|  |                |                  |                |               |                 |               | ZBTB25   |             | 0.98556     |
|  |                |                  |                |               |                 |               | ZBTB37   |             | 0.95235     |
|  |                |                  |                |               |                 |               | SMG8     |             | 0.94083     |
|  |                |                  |                |               |                 |               | PDE10A   |             | 0.90262     |
|  |                |                  |                |               |                 |               | DCBLD1   |             | 0.96715     |
|  |                |                  |                |               |                 |               | MFN1     |             | 0.99022     |
|  |                |                  |                |               |                 |               | PARP9    |             | 0.95806     |
|  |                |                  |                |               |                 |               | RICTOR   |             | 0.98383     |
|  |                |                  |                |               |                 |               | ZNF860   |             | 0.88116     |

|  | early_above_70 | early_aged_60_70 | early_below_55 | late_above_70 | late_aged_60_70 | late_below_55 | Probe ID | Description | Correlation |
|--|----------------|------------------|----------------|---------------|-----------------|---------------|----------|-------------|-------------|
|  |                |                  |                |               |                 |               | C19orf53 |             | 0.97967     |
|  |                |                  |                |               |                 |               | CLN6     |             | 0.97913     |
|  |                |                  |                |               |                 |               | EEF1D    |             | 0.98313     |
|  |                |                  |                |               |                 |               | EMP3     |             | 0.96564     |
|  |                |                  |                |               |                 |               | HOXA3    |             | 0.89890     |
|  |                |                  |                |               |                 |               | HSPBP1   |             | 0.97561     |
|  |                |                  |                |               |                 |               | POLR2I   |             | 0.98259     |
|  |                |                  |                |               |                 |               | RPLP1    |             | 0.99878     |
|  |                |                  |                |               |                 |               | THOC6    |             | 0.98815     |
|  |                |                  |                |               |                 |               | MRPL28   |             | 0.94339     |
|  |                |                  |                |               |                 |               | KRTCAP2  |             | 0.95947     |
|  |                |                  |                |               |                 |               | POLR2L   |             | 0.96161     |
|  |                |                  |                |               |                 |               | BCL7C    |             | 0.99623     |
|  |                |                  |                |               |                 |               | PRRT4    |             | 0.92382     |
|  |                |                  |                |               |                 |               | PUS1     |             | 0.97353     |
|  |                |                  |                |               |                 |               | RPL35    |             | 0.96626     |
|  |                |                  |                |               |                 |               | S100A16  |             | 0.95614     |
|  |                |                  |                |               |                 |               | TOMM40   |             | 0.96742     |
|  |                |                  |                |               |                 |               | VMO1     |             | 0.95472     |

|  | early_above_70 | early_aged_60_70 | early_below_55 | late_above_70 | late_aged_60_70 | late_below_55 | Probe ID | Descripti... | Correlation |
|--|----------------|------------------|----------------|---------------|-----------------|---------------|----------|--------------|-------------|
|  |                |                  |                |               |                 |               | CBF8     |              | 0.98476     |
|  |                |                  |                |               |                 |               | CBR4     |              | 0.95941     |
|  |                |                  |                |               |                 |               | CHCHD2   |              | 0.96706     |
|  |                |                  |                |               |                 |               | COX7A2L  |              | 0.96978     |
|  |                |                  |                |               |                 |               | COX7C    |              | 0.98621     |
|  |                |                  |                |               |                 |               | FOXRED1  |              | 0.94731     |
|  |                |                  |                |               |                 |               | FRS3     |              | 0.95724     |
|  |                |                  |                |               |                 |               | GSTO1    |              | 0.87894     |
|  |                |                  |                |               |                 |               | METTL21A |              | 0.83948     |
|  |                |                  |                |               |                 |               | NFE2L3   |              | 0.92062     |
|  |                |                  |                |               |                 |               | NOP58    |              | 0.96722     |
|  |                |                  |                |               |                 |               | PBLD     |              | 0.79515     |
|  |                |                  |                |               |                 |               | PSPH     |              | 0.95842     |
|  |                |                  |                |               |                 |               | SNRPB    |              | 0.98916     |
|  |                |                  |                |               |                 |               | TRIAP1   |              | 0.95766     |
|  |                |                  |                |               |                 |               | GEMIN6   |              | 0.98116     |
|  |                |                  |                |               |                 |               | SNRPD1   |              | 0.98957     |
|  |                |                  |                |               |                 |               | NAA38    |              | 0.94282     |
|  |                |                  |                |               |                 |               | BET1     |              | 0.98148     |
|  |                |                  |                |               |                 |               | CRLS1    |              | 0.91716     |
|  |                |                  |                |               |                 |               | EPB41L3  |              | 0.92140     |
|  |                |                  |                |               |                 |               | EXOSC8   |              | 0.98695     |
|  |                |                  |                |               |                 |               | FBXL2    |              | 0.91748     |
|  |                |                  |                |               |                 |               | GRB14    |              | 0.90591     |
|  |                |                  |                |               |                 |               | NDUFA8   |              | 0.93513     |
|  |                |                  |                |               |                 |               | NUFIP1   |              | 0.93595     |
|  |                |                  |                |               |                 |               | PCDHB3   |              | 0.93872     |
|  |                |                  |                |               |                 |               | RASGEF1C |              | 0.72422     |
|  |                |                  |                |               |                 |               | RPIA     |              | 0.96683     |
|  |                |                  |                |               |                 |               | SPATA9   |              | 0.84582     |
|  |                |                  |                |               |                 |               | TMEM97   |              | 0.98928     |
|  |                |                  |                |               |                 |               | TUBB1    |              | 0.90983     |
|  |                |                  |                |               |                 |               | CETN3    |              | 0.90574     |
|  |                |                  |                |               |                 |               | FAM200A  |              | 0.97711     |
|  |                |                  |                |               |                 |               | ALPK2    |              | 0.94040     |
|  |                |                  |                |               |                 |               | C5orf34  |              | 0.90653     |
|  |                |                  |                |               |                 |               | COX17    |              | 0.88632     |
|  |                |                  |                |               |                 |               | EEF1E1   |              | 0.97459     |
|  |                |                  |                |               |                 |               | HOXA4    |              | 0.97953     |
|  |                |                  |                |               |                 |               | HSPE1    |              | 0.92489     |
|  |                |                  |                |               |                 |               | LIMS1    |              | 0.87244     |
|  |                |                  |                |               |                 |               | MLF1     |              | 0.93955     |
|  |                |                  |                |               |                 |               | POLR2G   |              | 0.92986     |
|  |                |                  |                |               |                 |               | PRKAR1B  |              | 0.93031     |
|  |                |                  |                |               |                 |               | RECQL4   |              | 0.91600     |
|  |                |                  |                |               |                 |               | SNRPG    |              | 0.93310     |



|  | early_above_70 | early_aged_60_70 | early_below_55 | late_above_70 | late_aged_60_70 | late_below_55 | Probe ID | Descripti... | Correlation |
|--|----------------|------------------|----------------|---------------|-----------------|---------------|----------|--------------|-------------|
|  |                |                  |                |               |                 |               | EFNA3    |              | 0.94499     |
|  |                |                  |                |               |                 |               | ESR2     |              | 0.87071     |
|  |                |                  |                |               |                 |               | ETV1     |              | 0.90232     |
|  |                |                  |                |               |                 |               | ICAM2    |              | 0.98118     |
|  |                |                  |                |               |                 |               | LGALS8   |              | 0.83029     |
|  |                |                  |                |               |                 |               | MECOM    |              | 0.97144     |
|  |                |                  |                |               |                 |               | MOXD1    |              | 0.92697     |
|  |                |                  |                |               |                 |               | PLAC8    |              | 0.79895     |
|  |                |                  |                |               |                 |               | RGS1     |              | 0.94865     |
|  |                |                  |                |               |                 |               | SH2D3C   |              | 0.86710     |
|  |                |                  |                |               |                 |               | PLCD3    |              | 0.87884     |
|  |                |                  |                |               |                 |               | RARG     |              | 0.94642     |
|  |                |                  |                |               |                 |               | BCAT1    |              | 0.87250     |
|  |                |                  |                |               |                 |               | CARD6    |              | 0.94853     |
|  |                |                  |                |               |                 |               | CCL21    |              | 0.84797     |
|  |                |                  |                |               |                 |               | CLEC4F   |              | 0.90771     |
|  |                |                  |                |               |                 |               | FBLN5    |              | 0.97583     |
|  |                |                  |                |               |                 |               | IGFALS   |              | 0.72893     |
|  |                |                  |                |               |                 |               | LUM      |              | 0.99517     |
|  |                |                  |                |               |                 |               | MID1     |              | 0.93038     |
|  |                |                  |                |               |                 |               | SDC4     |              | 0.92065     |
|  |                |                  |                |               |                 |               | SFRP2    |              | 0.96368     |
|  |                |                  |                |               |                 |               | TBC1D22B |              | 0.95334     |
|  |                |                  |                |               |                 |               | THBS4    |              | 0.97805     |
|  |                |                  |                |               |                 |               | TMEM176B |              | 0.79751     |
|  |                |                  |                |               |                 |               | TNFSF13B |              | 0.94999     |
|  |                |                  |                |               |                 |               | VAV3     |              | 0.86300     |
|  |                |                  |                |               |                 |               | VDR      |              | 0.96942     |
|  |                |                  |                |               |                 |               | JDP2     |              | 0.92562     |
|  |                |                  |                |               |                 |               | KLHL35   |              | 0.97027     |
|  |                |                  |                |               |                 |               | PLEKHA4  |              | 0.96092     |
|  |                |                  |                |               |                 |               | ACHE     |              | 0.94053     |
|  |                |                  |                |               |                 |               | ADAMTSL5 |              | 0.79200     |
|  |                |                  |                |               |                 |               | AXL      |              | 0.97029     |
|  |                |                  |                |               |                 |               | C19orf73 |              | 0.72518     |
|  |                |                  |                |               |                 |               | CNPY4    |              | 0.84906     |
|  |                |                  |                |               |                 |               | EPHA1    |              | 0.76243     |
|  |                |                  |                |               |                 |               | IGDCC4   |              | 0.81646     |
|  |                |                  |                |               |                 |               | MLKL     |              | 0.84325     |
|  |                |                  |                |               |                 |               | MST1R    |              | 0.99097     |
|  |                |                  |                |               |                 |               | NOS3     |              | 0.98518     |
|  |                |                  |                |               |                 |               | NTNG1    |              | 0.83337     |
|  |                |                  |                |               |                 |               | RHOV     |              | 0.92152     |
|  |                |                  |                |               |                 |               | SLPI     |              | 0.87572     |
|  |                |                  |                |               |                 |               | SPSB1    |              | 0.97089     |
|  |                |                  |                |               |                 |               | TYMP     |              | 0.96641     |
|  |                |                  |                |               |                 |               | UPP1     |              | 0.91534     |
|  |                |                  |                |               |                 |               | ZNF385A  |              | 0.92890     |

|  | early_above_70 | early_aged_60_70 | early_below_55 | late_above_70 | late_aged_60_70 | late_below_55 | Probe ID | Description | Correlation |
|--|----------------|------------------|----------------|---------------|-----------------|---------------|----------|-------------|-------------|
|  |                |                  |                |               |                 |               | CEACAM5  |             | 0.95985     |
|  |                |                  |                |               |                 |               | C22orf24 |             | 0.91789     |
|  |                |                  |                |               |                 |               | FOSL1    |             | 0.83617     |
|  |                |                  |                |               |                 |               | SERTAD1  |             | 0.96572     |
|  |                |                  |                |               |                 |               | CDH22    |             | 0.90999     |
|  |                |                  |                |               |                 |               | CERS3    |             | 0.94841     |
|  |                |                  |                |               |                 |               | GABRP    |             | 0.88668     |
|  |                |                  |                |               |                 |               | SELE     |             | 0.93914     |
|  |                |                  |                |               |                 |               | SPOCD1   |             | 0.68223     |
|  |                |                  |                |               |                 |               | WIF1     |             | 0.88634     |
|  |                |                  |                |               |                 |               | B3CNT3   |             | 0.87562     |
|  |                |                  |                |               |                 |               | GPR3     |             | 0.70697     |
|  |                |                  |                |               |                 |               | GPR39    |             | 0.91901     |
|  |                |                  |                |               |                 |               | P2RY2    |             | 0.90482     |
|  |                |                  |                |               |                 |               | SYNPO2L  |             | 0.94571     |

|  | early_above_70 | early_aged_60_70 | early_below_55 | late_above_70 | late_aged_60_70 | late_below_55 | Probe ID | Description | Correlation |
|--|----------------|------------------|----------------|---------------|-----------------|---------------|----------|-------------|-------------|
|  |                |                  |                |               |                 |               | ACOT2    |             | 0.89305     |
|  |                |                  |                |               |                 |               | ANGPTL6  |             | 0.89447     |
|  |                |                  |                |               |                 |               | FAM83F   |             | 0.79515     |
|  |                |                  |                |               |                 |               | ITGB6    |             | 0.96232     |
|  |                |                  |                |               |                 |               | C17orf97 |             | 0.84294     |
|  |                |                  |                |               |                 |               | CCL20    |             | 0.98255     |
|  |                |                  |                |               |                 |               | FRMPD1   |             | 0.98067     |
|  |                |                  |                |               |                 |               | MS4A2    |             | 0.97679     |
|  |                |                  |                |               |                 |               | MTMR8    |             | 0.91232     |
|  |                |                  |                |               |                 |               | PHEX     |             | 0.90797     |
|  |                |                  |                |               |                 |               | SCML4    |             | 0.94723     |
|  |                |                  |                |               |                 |               | CR1      |             | 0.96219     |
|  |                |                  |                |               |                 |               | ERBB4    |             | 0.99124     |
|  |                |                  |                |               |                 |               | CELA2B   |             | 0.89656     |
|  |                |                  |                |               |                 |               | EVX1     |             | 0.85255     |
|  |                |                  |                |               |                 |               | SAMD12   |             | 0.95934     |



|  | early_above_70 | early_aged_60_70 | early_below_55 | late_above_70 | late_aged_60_70 | late_below_55 | Probe ID    | Description | Correlation |
|--|----------------|------------------|----------------|---------------|-----------------|---------------|-------------|-------------|-------------|
|  |                |                  |                |               |                 |               | CTSC        |             | 0.96720     |
|  |                |                  |                |               |                 |               | GPNMB       |             | 0.96413     |
|  |                |                  |                |               |                 |               | IRF8        |             | 0.98762     |
|  |                |                  |                |               |                 |               | KIF17       |             | 0.98644     |
|  |                |                  |                |               |                 |               | PITPNM1     |             | 0.99179     |
|  |                |                  |                |               |                 |               | RSAD2       |             | 0.96766     |
|  |                |                  |                |               |                 |               | SLC20A1     |             | 0.96456     |
|  |                |                  |                |               |                 |               | SMAD7       |             | 0.98407     |
|  |                |                  |                |               |                 |               | TTYH3       |             | 0.97479     |
|  |                |                  |                |               |                 |               | ARG1        |             | 0.88381     |
|  |                |                  |                |               |                 |               | BST1        |             | 0.97596     |
|  |                |                  |                |               |                 |               | CYTH3       |             | 0.93672     |
|  |                |                  |                |               |                 |               | EEF1A2      |             | 0.98640     |
|  |                |                  |                |               |                 |               | EPB41L2     |             | 0.98907     |
|  |                |                  |                |               |                 |               | GIMAP2      |             | 0.93635     |
|  |                |                  |                |               |                 |               | HAVCR2      |             | 0.96917     |
|  |                |                  |                |               |                 |               | MS4A4A      |             | 0.97726     |
|  |                |                  |                |               |                 |               | PLS3        |             | 0.98654     |
|  |                |                  |                |               |                 |               | PRG4        |             | 0.91650     |
|  |                |                  |                |               |                 |               | ST6GALNA... |             | 0.94810     |
|  |                |                  |                |               |                 |               | STAT4       |             | 0.97802     |
|  |                |                  |                |               |                 |               | TM6SF1      |             | 0.90158     |
|  |                |                  |                |               |                 |               | VAV1        |             | 0.95329     |
|  |                |                  |                |               |                 |               | DCLK2       |             | 0.91334     |
|  |                |                  |                |               |                 |               | GMPS        |             | 0.92171     |
|  |                |                  |                |               |                 |               | PLCB3       |             | 0.97143     |
|  |                |                  |                |               |                 |               | PLXDC1      |             | 0.97106     |
|  |                |                  |                |               |                 |               | XKR9        |             | 0.99598     |
|  |                |                  |                |               |                 |               | ZSWIM4      |             | 0.98977     |

|  | early_above_70 | early_aged_60_70 | early_below_55 | late_above_70 | late_aged_60_70 | late_below_55 | Probe ID | Description | Correlation |
|--|----------------|------------------|----------------|---------------|-----------------|---------------|----------|-------------|-------------|
|  |                |                  |                |               |                 |               | BTC3     |             | 0.92780     |
|  |                |                  |                |               |                 |               | CPT1A    |             | 0.93104     |
|  |                |                  |                |               |                 |               | HECW2    |             | 0.94805     |
|  |                |                  |                |               |                 |               | PLBD1    |             | 0.97962     |
|  |                |                  |                |               |                 |               | SLC7A5   |             | 0.91526     |
|  |                |                  |                |               |                 |               | SRGN     |             | 0.95730     |
|  |                |                  |                |               |                 |               | HLA-DMA  |             | 0.94582     |
|  |                |                  |                |               |                 |               | ACVRL1   |             | 0.96424     |
|  |                |                  |                |               |                 |               | CALCRL   |             | 0.94740     |
|  |                |                  |                |               |                 |               | CCRL2    |             | 0.95604     |
|  |                |                  |                |               |                 |               | CD96     |             | 0.97027     |
|  |                |                  |                |               |                 |               | CYTIP    |             | 0.98675     |
|  |                |                  |                |               |                 |               | EHD4     |             | 0.99441     |
|  |                |                  |                |               |                 |               | FGR      |             | 0.92999     |
|  |                |                  |                |               |                 |               | GIMAP6   |             | 0.95289     |
|  |                |                  |                |               |                 |               | HMCN1    |             | 0.93388     |
|  |                |                  |                |               |                 |               | LCP2     |             | 0.96756     |
|  |                |                  |                |               |                 |               | PPP2R5B  |             | 0.98656     |
|  |                |                  |                |               |                 |               | SH3BP5   |             | 0.94578     |
|  |                |                  |                |               |                 |               | SIGLEC10 |             | 0.99636     |
|  |                |                  |                |               |                 |               | TIE1     |             | 0.96977     |
|  |                |                  |                |               |                 |               | TMEM47   |             | 0.98173     |
|  |                |                  |                |               |                 |               | VNN1     |             | 0.98290     |
|  |                |                  |                |               |                 |               | VWF      |             | 0.97613     |
|  |                |                  |                |               |                 |               | ZNF385D  |             | 0.97612     |
|  |                |                  |                |               |                 |               | KCTD12   |             | 0.92024     |
|  |                |                  |                |               |                 |               | C1S      |             | 0.93517     |
|  |                |                  |                |               |                 |               | FMNL1    |             | 0.98829     |
|  |                |                  |                |               |                 |               | GPR4     |             | 0.97869     |
|  |                |                  |                |               |                 |               | KLF13    |             | 0.96505     |

|  | early_above_70 | early_aged_60_70 | early_below_55 | late_above_70 | late_aged_60_70 | late_below_55 | Probe ID | Description | Correlation |
|--|----------------|------------------|----------------|---------------|-----------------|---------------|----------|-------------|-------------|
|  |                |                  |                |               |                 |               | BICC1    |             | 0.85893     |
|  |                |                  |                |               |                 |               | EPDR1    |             | 0.87966     |
|  |                |                  |                |               |                 |               | USP44    |             | 0.98699     |
|  |                |                  |                |               |                 |               | TTC4     |             | 0.97448     |
|  |                |                  |                |               |                 |               | CCDC158  |             | 0.99117     |
|  |                |                  |                |               |                 |               | MATN1    |             | 0.96977     |

|  | early_above_70 | early_aged_60_70 | early_below_55 | late_above_70 | late_aged_60_70 | late_below_55 | Probe ID | Description | Correlation |
|--|----------------|------------------|----------------|---------------|-----------------|---------------|----------|-------------|-------------|
|  |                |                  |                |               |                 |               | MAN1C1   |             | 0.97131     |
|  |                |                  |                |               |                 |               | SH3PXD2A |             | 0.99204     |
|  |                |                  |                |               |                 |               | ARHGD1B  |             | 0.94399     |
|  |                |                  |                |               |                 |               | CASQ2    |             | 0.99309     |
|  |                |                  |                |               |                 |               | ENPP3    |             | 0.88581     |
|  |                |                  |                |               |                 |               | IL18R1   |             | 0.94049     |
|  |                |                  |                |               |                 |               | ITGA10   |             | 0.98915     |
|  |                |                  |                |               |                 |               | LOXL2    |             | 0.91963     |
|  |                |                  |                |               |                 |               | PKDCC    |             | 0.96537     |
|  |                |                  |                |               |                 |               | SAFB     |             | 0.93294     |

|  | early_above_70 | early_aged_60_70 | early_below_55 | late_above_70 | late_aged_60_70 | late_below_55 | Probe ID | Description | Correlation |
|--|----------------|------------------|----------------|---------------|-----------------|---------------|----------|-------------|-------------|
|  |                |                  |                |               |                 |               | RASIP1   |             | 0.97690     |
|  |                |                  |                |               |                 |               | RND3     |             | 0.88153     |
|  |                |                  |                |               |                 |               | CEBPB    |             | 0.95190     |
|  |                |                  |                |               |                 |               | DCDC2    |             | 0.88017     |
|  |                |                  |                |               |                 |               | KCNJ15   |             | 0.94211     |
|  |                |                  |                |               |                 |               | PADI2    |             | 0.85951     |
|  |                |                  |                |               |                 |               | TNNI2    |             | 0.94471     |
|  |                |                  |                |               |                 |               | CYGB     |             | 0.92203     |
|  |                |                  |                |               |                 |               | CYP251   |             | 0.93614     |
|  |                |                  |                |               |                 |               | EFNA5    |             | 0.92940     |
|  |                |                  |                |               |                 |               | EXOC3L4  |             | 0.91813     |
|  |                |                  |                |               |                 |               | F12      |             | 0.95186     |
|  |                |                  |                |               |                 |               | KLK10    |             | 0.78210     |
|  |                |                  |                |               |                 |               | ODF3B    |             | 0.87073     |
|  |                |                  |                |               |                 |               | TEAD4    |             | 0.88348     |

|  | early_above_70 | early_aged_60_70 | early_below_55 | late_above_70 | late_aged_60_70 | late_below_55 | Probe ID | Description | Correlation |
|--|----------------|------------------|----------------|---------------|-----------------|---------------|----------|-------------|-------------|
|  |                |                  |                |               |                 |               | AFAP1L1  |             | 0.96984     |
|  |                |                  |                |               |                 |               | ANKRD50  |             | 0.91692     |
|  |                |                  |                |               |                 |               | CASP8    |             | 0.97019     |
|  |                |                  |                |               |                 |               | ELK3     |             | 0.93472     |
|  |                |                  |                |               |                 |               | FAM126B  |             | 0.99233     |
|  |                |                  |                |               |                 |               | FARP2    |             | 0.83635     |
|  |                |                  |                |               |                 |               | MALL     |             | 0.96036     |
|  |                |                  |                |               |                 |               | NCOA3    |             | 0.93938     |
|  |                |                  |                |               |                 |               | SCAF11   |             | 0.97212     |
|  |                |                  |                |               |                 |               | SLC41A2  |             | 0.95590     |
|  |                |                  |                |               |                 |               | TANC1    |             | 0.95569     |
|  |                |                  |                |               |                 |               | XYLT1    |             | 0.96595     |
|  |                |                  |                |               |                 |               | ZFAT     |             | 0.96876     |
|  |                |                  |                |               |                 |               | RNF139   |             | 0.92358     |
|  |                |                  |                |               |                 |               | ACVR1    |             | 0.96455     |
|  |                |                  |                |               |                 |               | ALMS1    |             | 0.97996     |
|  |                |                  |                |               |                 |               | ATP11B   |             | 0.94024     |
|  |                |                  |                |               |                 |               | FBP2     |             | 0.87678     |
|  |                |                  |                |               |                 |               | MOSPD2   |             | 0.94805     |
|  |                |                  |                |               |                 |               | RAB30    |             | 0.94907     |
|  |                |                  |                |               |                 |               | RPS6KA5  |             | 0.98163     |
|  |                |                  |                |               |                 |               | TEK      |             | 0.99338     |
|  |                |                  |                |               |                 |               | TMTC1    |             | 0.98710     |
|  |                |                  |                |               |                 |               | WDR20    |             | 0.98605     |
|  |                |                  |                |               |                 |               | ZNF644   |             | 0.94046     |
|  |                |                  |                |               |                 |               | IGSF3    |             | 0.97785     |
|  |                |                  |                |               |                 |               | DNASE1L1 |             | 0.98682     |
|  |                |                  |                |               |                 |               | EMCN     |             | 0.95860     |
|  |                |                  |                |               |                 |               | PEX11A   |             | 0.94180     |
|  |                |                  |                |               |                 |               | SMAD1    |             | 0.98018     |
|  |                |                  |                |               |                 |               | TLK1     |             | 0.96997     |

|  | early_above_70 | early_aged_60_70 | early_below_55 | late_above_70 | late_aged_60_70 | late_below_55 | Probe ID | Description | Correlation |
|--|----------------|------------------|----------------|---------------|-----------------|---------------|----------|-------------|-------------|
|  |                |                  |                |               |                 |               | DDX60    |             | 0.96955     |
|  |                |                  |                |               |                 |               | CAMK2D   |             | 0.97381     |
|  |                |                  |                |               |                 |               | PAG1     |             | 0.98786     |
|  |                |                  |                |               |                 |               | RBM12B   |             | 0.97446     |

|  | early_above_70 | early_aged_60_70 | early_below_55 | late_above_70 | late_aged_60_70 | late_below_55 | Probe ID  | Description | Correlation |
|--|----------------|------------------|----------------|---------------|-----------------|---------------|-----------|-------------|-------------|
|  |                |                  |                |               |                 |               | CD9       |             | 0.83762     |
|  |                |                  |                |               |                 |               | EAF2      |             | 0.75372     |
|  |                |                  |                |               |                 |               | FDFT1     |             | 0.95725     |
|  |                |                  |                |               |                 |               | HMGCR     |             | 0.94055     |
|  |                |                  |                |               |                 |               | MCCC2     |             | 0.93693     |
|  |                |                  |                |               |                 |               | NOL4      |             | 0.82066     |
|  |                |                  |                |               |                 |               | TNFRSF10A |             | 0.84778     |
|  |                |                  |                |               |                 |               | ADCYAP1R1 |             | 0.99280     |
|  |                |                  |                |               |                 |               | CMAS      |             | 0.82415     |
|  |                |                  |                |               |                 |               | CNTNAP3   |             | 0.92883     |
|  |                |                  |                |               |                 |               | FREM2     |             | 0.96903     |
|  |                |                  |                |               |                 |               | MAOB      |             | 0.93145     |
|  |                |                  |                |               |                 |               | TAS1R1    |             | 0.89848     |

|  | early_above_70 | early_aged_60_70 | early_below_55 | late_above_70 | late_aged_60_70 | late_below_55 | Probe ID | Description | Correlation |
|--|----------------|------------------|----------------|---------------|-----------------|---------------|----------|-------------|-------------|
|  |                |                  |                |               |                 |               | GAS2L3   |             | 0.91267     |
|  |                |                  |                |               |                 |               | GRIK4    |             | 0.97929     |
|  |                |                  |                |               |                 |               | LGR5     |             | 0.93907     |
|  |                |                  |                |               |                 |               | MTTP     |             | 0.98749     |
|  |                |                  |                |               |                 |               | TP53TG5  |             | 0.96770     |
|  |                |                  |                |               |                 |               | ARHGAP36 |             | 0.87656     |
|  |                |                  |                |               |                 |               | ATP2B2   |             | 0.91643     |
|  |                |                  |                |               |                 |               | GRM4     |             | 0.99014     |
|  |                |                  |                |               |                 |               | HS3ST3B1 |             | 0.98139     |
|  |                |                  |                |               |                 |               | IL1RL1   |             | 0.96791     |
|  |                |                  |                |               |                 |               | LILRA1   |             | 0.98956     |
|  |                |                  |                |               |                 |               | MAEL     |             | 0.94646     |
|  |                |                  |                |               |                 |               | RGS20    |             | 0.94973     |
|  |                |                  |                |               |                 |               | UPB1     |             | 0.91019     |
|  |                |                  |                |               |                 |               | KCNT2    |             | 0.99383     |
|  |                |                  |                |               |                 |               | LDLRAD1  |             | 0.90053     |

|  | early_above_70 | early_aged_60_70 | early_below_55 | late_above_70 | late_aged_60_70 | late_below_55 | Probe ID | Description | Correlation |
|--|----------------|------------------|----------------|---------------|-----------------|---------------|----------|-------------|-------------|
|  |                |                  |                |               |                 |               | BCAP29   |             | 0.98391     |
|  |                |                  |                |               |                 |               | CYB561D2 |             | 0.98590     |
|  |                |                  |                |               |                 |               | ERRF1    |             | 0.96446     |
|  |                |                  |                |               |                 |               | FURIN    |             | 0.86694     |
|  |                |                  |                |               |                 |               | INPP5K   |             | 0.95817     |
|  |                |                  |                |               |                 |               | KLHL22   |             | 0.97604     |
|  |                |                  |                |               |                 |               | MAN2B1   |             | 0.98541     |
|  |                |                  |                |               |                 |               | NR4A2    |             | 0.84861     |
|  |                |                  |                |               |                 |               | PDK2     |             | 0.98838     |
|  |                |                  |                |               |                 |               | SLC1A4   |             | 0.94538     |
|  |                |                  |                |               |                 |               | SLC24A1  |             | 0.77937     |
|  |                |                  |                |               |                 |               | TNFRSF21 |             | 0.83390     |
|  |                |                  |                |               |                 |               | USP3     |             | 0.91232     |
|  |                |                  |                |               |                 |               | SLC9A1   |             | 0.92510     |
|  |                |                  |                |               |                 |               | SND1     |             | 0.89480     |
|  |                |                  |                |               |                 |               | AMOT     |             | 0.91400     |
|  |                |                  |                |               |                 |               | CITED1   |             | 0.96538     |
|  |                |                  |                |               |                 |               | LRRIQ1   |             | 0.92842     |
|  |                |                  |                |               |                 |               | MORC4    |             | 0.86934     |
|  |                |                  |                |               |                 |               | N4BP1    |             | 0.98782     |
|  |                |                  |                |               |                 |               | PSTPIP2  |             | 0.96329     |
|  |                |                  |                |               |                 |               | PXMP4    |             | 0.94582     |
|  |                |                  |                |               |                 |               | SGPP1    |             | 0.99859     |
|  |                |                  |                |               |                 |               | CYB5D2   |             | 0.94360     |
|  |                |                  |                |               |                 |               | LMF2     |             | 0.97615     |
|  |                |                  |                |               |                 |               | LSR      |             | 0.96490     |
|  |                |                  |                |               |                 |               | PREB     |             | 0.99487     |
|  |                |                  |                |               |                 |               | STK40    |             | 0.96552     |

|  | early_above_70 | early_aged_60_70 | early_below_55 | late_above_70 | late_aged_60_70 | late_below_55 | Probe ID | Descripti... | Correlation |
|--|----------------|------------------|----------------|---------------|-----------------|---------------|----------|--------------|-------------|
|  |                |                  |                |               |                 |               | DCBLD2   |              | 0.96485     |
|  |                |                  |                |               |                 |               | DERL2    |              | 0.95394     |
|  |                |                  |                |               |                 |               | DNAJB5   |              | 0.96387     |
|  |                |                  |                |               |                 |               | GPR161   |              | 0.96502     |
|  |                |                  |                |               |                 |               | LGR6     |              | 0.95106     |
|  |                |                  |                |               |                 |               | ME3      |              | 0.96898     |
|  |                |                  |                |               |                 |               | NUDT15   |              | 0.89750     |
|  |                |                  |                |               |                 |               | RCBTB2   |              | 0.93817     |
|  |                |                  |                |               |                 |               | ST3GAL3  |              | 0.93518     |
|  |                |                  |                |               |                 |               | TEX14    |              | 0.97069     |
|  |                |                  |                |               |                 |               | UCHL3    |              | 0.96590     |
|  |                |                  |                |               |                 |               | VILL     |              | 0.92234     |
|  |                |                  |                |               |                 |               | AGTRAP   |              | 0.93188     |
|  |                |                  |                |               |                 |               | PAK1IP1  |              | 0.95512     |
|  |                |                  |                |               |                 |               | PARP6    |              | 0.99397     |
|  |                |                  |                |               |                 |               | PDIA3    |              | 0.99468     |
|  |                |                  |                |               |                 |               | ADPRH    |              | 0.97919     |
|  |                |                  |                |               |                 |               | ANGPT1   |              | 0.96513     |
|  |                |                  |                |               |                 |               | ANGPTL1  |              | 0.94877     |
|  |                |                  |                |               |                 |               | ANO4     |              | 0.97545     |
|  |                |                  |                |               |                 |               | BEST3    |              | 0.96723     |
|  |                |                  |                |               |                 |               | CAP2     |              | 0.90248     |
|  |                |                  |                |               |                 |               | CPE      |              | 0.98524     |
|  |                |                  |                |               |                 |               | DPT      |              | 0.92258     |
|  |                |                  |                |               |                 |               | FAM124A  |              | 0.99010     |
|  |                |                  |                |               |                 |               | FLNC     |              | 0.99036     |
|  |                |                  |                |               |                 |               | GMPR     |              | 0.98785     |
|  |                |                  |                |               |                 |               | HGD      |              | 0.95037     |
|  |                |                  |                |               |                 |               | MYLK4    |              | 0.94246     |
|  |                |                  |                |               |                 |               | OGN      |              | 0.96271     |
|  |                |                  |                |               |                 |               | PDIA5    |              | 0.96759     |
|  |                |                  |                |               |                 |               | PCC      |              | 0.98147     |
|  |                |                  |                |               |                 |               | RAB9B    |              | 0.95045     |
|  |                |                  |                |               |                 |               | TMEFF2   |              | 0.95449     |
|  |                |                  |                |               |                 |               | TPD52L1  |              | 0.97819     |
|  |                |                  |                |               |                 |               | TSPAN9   |              | 0.94023     |
|  |                |                  |                |               |                 |               | FAT3     |              | 0.97326     |
|  |                |                  |                |               |                 |               | CCDC125  |              | 0.98901     |
|  |                |                  |                |               |                 |               | GPT2     |              | 0.95785     |
|  |                |                  |                |               |                 |               | KRT14    |              | 0.97248     |
|  |                |                  |                |               |                 |               | PPP1R7   |              | 0.99586     |
|  |                |                  |                |               |                 |               | SEC14L2  |              | 0.94936     |
|  |                |                  |                |               |                 |               | SH3BGRL2 |              | 0.99023     |
|  |                |                  |                |               |                 |               | SLC25A42 |              | 0.98438     |
|  |                |                  |                |               |                 |               | SPAG7    |              | 0.96406     |
|  |                |                  |                |               |                 |               | TMEM220  |              | 0.97573     |

|  | early_above_70 | early_aged_60_70 | early_below_55 | late_above_70 | late_aged_60_70 | late_below_55 | Probe ID | Description | Correlation |
|--|----------------|------------------|----------------|---------------|-----------------|---------------|----------|-------------|-------------|
|  |                |                  |                |               |                 |               | ECHDC2   |             | 0.96084     |
|  |                |                  |                |               |                 |               | EMILIN1  |             | 0.93996     |
|  |                |                  |                |               |                 |               | GSTM5    |             | 0.97875     |
|  |                |                  |                |               |                 |               | SH2D3A   |             | 0.92427     |
|  |                |                  |                |               |                 |               | TMEM44   |             | 0.91125     |
|  |                |                  |                |               |                 |               | DUOX1    |             | 0.95525     |
|  |                |                  |                |               |                 |               | PHF21B   |             | 0.88045     |
|  |                |                  |                |               |                 |               | TRPC4    |             | 0.95241     |
|  |                |                  |                |               |                 |               | LIMS2    |             | 0.93304     |

|  | early_above_70 | early_aged_60_70 | early_below_55 | late_above_70 | late_aged_60_70 | late_below_55 | Probe ID | Description | Correlation |
|--|----------------|------------------|----------------|---------------|-----------------|---------------|----------|-------------|-------------|
|  |                |                  |                |               |                 |               | DDAH1    |             | 0.89773     |
|  |                |                  |                |               |                 |               | DNAH6    |             | 0.90019     |
|  |                |                  |                |               |                 |               | SEMA3A   |             | 0.89784     |
|  |                |                  |                |               |                 |               | ARL10    |             | 0.90708     |
|  |                |                  |                |               |                 |               | GABRB3   |             | 0.97603     |
|  |                |                  |                |               |                 |               | ALG5     |             | 0.90627     |
|  |                |                  |                |               |                 |               | EYA1     |             | 0.91616     |
|  |                |                  |                |               |                 |               | FLG      |             | 0.91134     |
|  |                |                  |                |               |                 |               | GNRHR    |             | 0.90108     |
|  |                |                  |                |               |                 |               | MEGF10   |             | 0.98723     |
|  |                |                  |                |               |                 |               | PPP4R4   |             | 0.88596     |
|  |                |                  |                |               |                 |               | PXDNL    |             | 0.86145     |
|  |                |                  |                |               |                 |               | RCAN3    |             | 0.82866     |
|  |                |                  |                |               |                 |               | SLC26A3  |             | 0.93398     |
|  |                |                  |                |               |                 |               | SLC6A3   |             | 0.88310     |
|  |                |                  |                |               |                 |               | TTC22    |             | 0.93937     |
|  |                |                  |                |               |                 |               | ACOT1    |             | 0.93984     |
|  |                |                  |                |               |                 |               | SPINT2   |             | 0.95810     |

|  | early_above_70 | early_aged_60_70 | early_below_55 | late_above_70 | late_aged_60_70 | late_below_55 | Probe ID | Description | Correlation |
|--|----------------|------------------|----------------|---------------|-----------------|---------------|----------|-------------|-------------|
|  |                |                  |                |               |                 |               | SEZ6     |             | 0.90274     |
|  |                |                  |                |               |                 |               | PTPRZ1   |             | 0.95325     |
|  |                |                  |                |               |                 |               | QPCT     |             | 0.78500     |
|  |                |                  |                |               |                 |               | RAB40AL  |             | 0.94029     |
|  |                |                  |                |               |                 |               | SLC44A5  |             | 0.99510     |
|  |                |                  |                |               |                 |               | TTBK1    |             | 0.95333     |
|  |                |                  |                |               |                 |               | ZNF711   |             | 0.95552     |
|  |                |                  |                |               |                 |               | KCNG3    |             | 0.97158     |
|  |                |                  |                |               |                 |               | ZFR2     |             | 0.91670     |

|  | early_above_70 | early_aged_60_70 | early_below_55 | late_above_70 | late_aged_60_70 | late_below_55 | Probe ID | Description | Correlation |
|--|----------------|------------------|----------------|---------------|-----------------|---------------|----------|-------------|-------------|
|  |                |                  |                |               |                 |               | AGPAT5   |             | 0.87160     |
|  |                |                  |                |               |                 |               | BCL2L14  |             | 0.96976     |
|  |                |                  |                |               |                 |               | GSR      |             | 0.95754     |
|  |                |                  |                |               |                 |               | HNMT     |             | 0.90985     |
|  |                |                  |                |               |                 |               | PDE4D    |             | 0.94317     |
|  |                |                  |                |               |                 |               | TMEM53   |             | 0.89279     |
|  |                |                  |                |               |                 |               | ZFP36    |             | 0.88259     |
|  |                |                  |                |               |                 |               | FOSB     |             | 0.85436     |
|  |                |                  |                |               |                 |               | CACNG4   |             | 0.97137     |
|  |                |                  |                |               |                 |               | CHRNA2   |             | 0.98070     |
|  |                |                  |                |               |                 |               | FBXO25   |             | 0.98651     |
|  |                |                  |                |               |                 |               | SORBS3   |             | 0.98258     |
|  |                |                  |                |               |                 |               | TMEM132B |             | 0.73386     |
|  |                |                  |                |               |                 |               | ADH5     |             | 0.93229     |
|  |                |                  |                |               |                 |               | DCXR     |             | 0.94143     |
|  |                |                  |                |               |                 |               | EPS8L1   |             | 0.92149     |
|  |                |                  |                |               |                 |               | PACSIN3  |             | 0.93267     |
|  |                |                  |                |               |                 |               | SERPINB5 |             | 0.83827     |
|  |                |                  |                |               |                 |               | TRADD    |             | 0.93432     |

|  | early_above_70 | early_aged_60_70 | early_below_55 | late_above_70 | late_aged_60_70 | late_below_55 | Probe ID | Description | Correlation |
|--|----------------|------------------|----------------|---------------|-----------------|---------------|----------|-------------|-------------|
|  |                |                  |                |               |                 |               | ITGB1    |             | 0.98782     |
|  |                |                  |                |               |                 |               | LRRC40   |             | 0.99082     |
|  |                |                  |                |               |                 |               | MOB4     |             | 0.95126     |
|  |                |                  |                |               |                 |               | PPP3CA   |             | 0.99150     |
|  |                |                  |                |               |                 |               | PRKAA1   |             | 0.98242     |
|  |                |                  |                |               |                 |               | RBM18    |             | 0.95065     |
|  |                |                  |                |               |                 |               | SENP7    |             | 0.96354     |
|  |                |                  |                |               |                 |               | MBLAC2   |             | 0.97908     |
|  |                |                  |                |               |                 |               | LYSMD3   |             | 0.97139     |
|  |                |                  |                |               |                 |               | RAB2A    |             | 0.96365     |
|  |                |                  |                |               |                 |               | RP2      |             | 0.98706     |

|  | early_above_70 | early_aged_60_70 | early_below_55 | late_above_70 | late_aged_60_70 | late_below_55 | Probe ID | Description | Correlation |
|--|----------------|------------------|----------------|---------------|-----------------|---------------|----------|-------------|-------------|
|  |                |                  |                |               |                 |               | RPS12    |             | 0.90570     |
|  |                |                  |                |               |                 |               | FDXR     |             | 0.80925     |
|  |                |                  |                |               |                 |               | HTR2B    |             | 0.91177     |
|  |                |                  |                |               |                 |               | LIN7A    |             | 0.93532     |
|  |                |                  |                |               |                 |               | NEK2     |             | 0.92142     |
|  |                |                  |                |               |                 |               | NPC1L1   |             | 0.96423     |
|  |                |                  |                |               |                 |               | PDE1A    |             | 0.87604     |
|  |                |                  |                |               |                 |               | TNFRSF8  |             | 0.94935     |
|  |                |                  |                |               |                 |               | TRIM67   |             | 0.85150     |
|  |                |                  |                |               |                 |               | AMZ1     |             | 0.89542     |
|  |                |                  |                |               |                 |               | RPS6KB2  |             | 0.79893     |
|  |                |                  |                |               |                 |               | TTC16    |             | 0.97738     |

|  | early_above_70 | early_aged_60_70 | early_below_55 | late_above_70 | late_aged_60_70 | late_below_55 | Probe ID | Description | Correlation |
|--|----------------|------------------|----------------|---------------|-----------------|---------------|----------|-------------|-------------|
|  |                |                  |                |               |                 |               | C16orf87 |             | 0.97467     |
|  |                |                  |                |               |                 |               | C1orf109 |             | 0.98757     |
|  |                |                  |                |               |                 |               | GABPA    |             | 0.96960     |
|  |                |                  |                |               |                 |               | KRR1     |             | 0.98762     |
|  |                |                  |                |               |                 |               | PHLDB2   |             | 0.91260     |
|  |                |                  |                |               |                 |               | UCHL5    |             | 0.92795     |
|  |                |                  |                |               |                 |               | BCOR     |             | 0.97265     |
|  |                |                  |                |               |                 |               | ACTR3    |             | 0.99390     |
|  |                |                  |                |               |                 |               | GDPD1    |             | 0.95362     |
|  |                |                  |                |               |                 |               | ZNF254   |             | 0.95833     |
|  |                |                  |                |               |                 |               | NAALADL2 |             | 0.96051     |
|  |                |                  |                |               |                 |               | PDIK1L   |             | 0.96853     |
|  |                |                  |                |               |                 |               | SP3      |             | 0.98400     |

|  | early_above_70 | early_aged_60_70 | early_below_55 | late_above_70 | late_aged_60_70 | late_below_55 | Probe ID    | Description | Correlation |
|--|----------------|------------------|----------------|---------------|-----------------|---------------|-------------|-------------|-------------|
|  |                |                  |                |               |                 |               | ASCL1       |             | 0.96455     |
|  |                |                  |                |               |                 |               | EPHB1       |             | 0.83349     |
|  |                |                  |                |               |                 |               | GCNT3       |             | 0.94387     |
|  |                |                  |                |               |                 |               | HOXB8       |             | 0.89948     |
|  |                |                  |                |               |                 |               | KIRREL3     |             | 0.97255     |
|  |                |                  |                |               |                 |               | LFNG        |             | 0.77122     |
|  |                |                  |                |               |                 |               | PTCD1       |             | 0.94881     |
|  |                |                  |                |               |                 |               | RSPO3       |             | 0.89081     |
|  |                |                  |                |               |                 |               | ZNF391      |             | 0.64512     |
|  |                |                  |                |               |                 |               | FADS2       |             | 0.86526     |
|  |                |                  |                |               |                 |               | CDH7        |             | 0.83771     |
|  |                |                  |                |               |                 |               | LRRTM2      |             | 0.96089     |
|  |                |                  |                |               |                 |               | ODC1        |             | 0.80094     |
|  |                |                  |                |               |                 |               | PI15        |             | 0.90154     |
|  |                |                  |                |               |                 |               | SEMA3D      |             | 0.85995     |
|  |                |                  |                |               |                 |               | SEMA6A      |             | 0.94981     |
|  |                |                  |                |               |                 |               | SLC16A12    |             | 0.94836     |
|  |                |                  |                |               |                 |               | STAP1       |             | 0.71387     |
|  |                |                  |                |               |                 |               | WFDC3       |             | 0.68591     |
|  |                |                  |                |               |                 |               | LOC10050... |             | 0.69792     |
|  |                |                  |                |               |                 |               | PPP2R2A     |             | 0.90934     |
|  |                |                  |                |               |                 |               | PRDM12      |             | 0.92911     |
|  |                |                  |                |               |                 |               | ULBP2       |             | 0.96436     |

|  | early_above_70 | early_aged_60_70 | early_below_55 | late_above_70 | late_aged_60_70 | late_below_55 | Probe ID | Description | Correlation |
|--|----------------|------------------|----------------|---------------|-----------------|---------------|----------|-------------|-------------|
|  |                |                  |                |               |                 |               | CAPN3    |             | 0.91742     |
|  |                |                  |                |               |                 |               | CNIH3    |             | 0.85304     |
|  |                |                  |                |               |                 |               | NNAT     |             | 0.87946     |
|  |                |                  |                |               |                 |               | PDLIM1   |             | 0.92815     |
|  |                |                  |                |               |                 |               | PSD      |             | 0.96064     |
|  |                |                  |                |               |                 |               | SMARCD3  |             | 0.96155     |
|  |                |                  |                |               |                 |               | PCOLCE   |             | 0.93680     |
|  |                |                  |                |               |                 |               | DKK3     |             | 0.87505     |
|  |                |                  |                |               |                 |               | GATA3    |             | 0.89752     |
|  |                |                  |                |               |                 |               | HUNK     |             | 0.74086     |
|  |                |                  |                |               |                 |               | JPH3     |             | 0.88119     |
|  |                |                  |                |               |                 |               | IGFBP4   |             | 0.97142     |
|  |                |                  |                |               |                 |               | ARID5A   |             | 0.77180     |
|  |                |                  |                |               |                 |               | CLEC11A  |             | 0.91319     |
|  |                |                  |                |               |                 |               | EFEMP2   |             | 0.98272     |
|  |                |                  |                |               |                 |               | MSX1     |             | 0.93683     |
|  |                |                  |                |               |                 |               | MUC1     |             | 0.86579     |
|  |                |                  |                |               |                 |               | S100A11  |             | 0.86588     |
|  |                |                  |                |               |                 |               | SRRM3    |             | 0.89527     |
|  |                |                  |                |               |                 |               | TBXA2R   |             | 0.87035     |
|  |                |                  |                |               |                 |               | TMEM88   |             | 0.93080     |
|  |                |                  |                |               |                 |               | TPRG1    |             | 0.79516     |



|  | early_above_70 | early_aged_60_70 | early_below_55 | late_above_70 | late_aged_60_70 | late_below_55 | Probe ID | Description | Correlation |
|--|----------------|------------------|----------------|---------------|-----------------|---------------|----------|-------------|-------------|
|  |                |                  |                |               |                 |               | ALPK1    |             | 0.97800     |
|  |                |                  |                |               |                 |               | CD82     |             | 0.94990     |
|  |                |                  |                |               |                 |               | DLG2     |             | 0.92941     |
|  |                |                  |                |               |                 |               | HOOK2    |             | 0.93261     |
|  |                |                  |                |               |                 |               | ITGA3    |             | 0.90215     |
|  |                |                  |                |               |                 |               | LRFN3    |             | 0.99457     |
|  |                |                  |                |               |                 |               | MAST4    |             | 0.94284     |
|  |                |                  |                |               |                 |               | PLXNA2   |             | 0.98206     |
|  |                |                  |                |               |                 |               | RPTOR    |             | 0.94935     |
|  |                |                  |                |               |                 |               | TG       |             | 0.90512     |
|  |                |                  |                |               |                 |               | TNRC6C   |             | 0.98043     |
|  |                |                  |                |               |                 |               | TTC7A    |             | 0.98126     |
|  |                |                  |                |               |                 |               | VPS18    |             | 0.99333     |
|  |                |                  |                |               |                 |               | THSD4    |             | 0.97334     |
|  |                |                  |                |               |                 |               | TLN2     |             | 0.97548     |
|  |                |                  |                |               |                 |               | ACAD10   |             | 0.99533     |
|  |                |                  |                |               |                 |               | ATP8B2   |             | 0.92516     |
|  |                |                  |                |               |                 |               | CXCL6    |             | 0.93387     |
|  |                |                  |                |               |                 |               | CYP46A1  |             | 0.99015     |
|  |                |                  |                |               |                 |               | ICAM4    |             | 0.88666     |
|  |                |                  |                |               |                 |               | LTF      |             | 0.91560     |
|  |                |                  |                |               |                 |               | MPPED2   |             | 0.98523     |
|  |                |                  |                |               |                 |               | PROM1    |             | 0.95539     |
|  |                |                  |                |               |                 |               | SMG6     |             | 0.95712     |
|  |                |                  |                |               |                 |               | TMEM132D |             | 0.91558     |
|  |                |                  |                |               |                 |               | CAPN13   |             | 0.77691     |
|  |                |                  |                |               |                 |               | BDH2     |             | 0.93172     |
|  |                |                  |                |               |                 |               | CDH3     |             | 0.98578     |
|  |                |                  |                |               |                 |               | CX3CL1   |             | 0.70785     |
|  |                |                  |                |               |                 |               | ERCC2    |             | 0.97466     |
|  |                |                  |                |               |                 |               | FOSL2    |             | 0.98189     |
|  |                |                  |                |               |                 |               | PIGR     |             | 0.66109     |
|  |                |                  |                |               |                 |               | RNF39    |             | 0.92826     |
|  |                |                  |                |               |                 |               | S100A1   |             | 0.94116     |
|  |                |                  |                |               |                 |               | SPTLC3   |             | 0.97012     |

|  | early_above_70 | early_aged_60_70 | early_below_55 | late_above_70 | late_aged_60_70 | late_below_55 | Probe ID | Description | Correlation |
|--|----------------|------------------|----------------|---------------|-----------------|---------------|----------|-------------|-------------|
|  |                |                  |                |               |                 |               | ARNTL2   |             | 0.92814     |
|  |                |                  |                |               |                 |               | CAD      |             | 0.95566     |
|  |                |                  |                |               |                 |               | CHD4     |             | 0.98224     |
|  |                |                  |                |               |                 |               | DUSP6    |             | 0.94354     |
|  |                |                  |                |               |                 |               | EPS8     |             | 0.98585     |
|  |                |                  |                |               |                 |               | ITGAL    |             | 0.98611     |
|  |                |                  |                |               |                 |               | KLF6     |             | 0.89042     |
|  |                |                  |                |               |                 |               | MEF2C    |             | 0.93710     |
|  |                |                  |                |               |                 |               | MNT      |             | 0.98713     |
|  |                |                  |                |               |                 |               | NDST1    |             | 0.96421     |
|  |                |                  |                |               |                 |               | PLD1     |             | 0.99104     |
|  |                |                  |                |               |                 |               | PRRC2B   |             | 0.97778     |
|  |                |                  |                |               |                 |               | RAPGEF5  |             | 0.98914     |
|  |                |                  |                |               |                 |               | SHQ1     |             | 0.92718     |
|  |                |                  |                |               |                 |               | SLCO2B1  |             | 0.95017     |
|  |                |                  |                |               |                 |               | TRAM2    |             | 0.92050     |
|  |                |                  |                |               |                 |               | CD55     |             | 0.94169     |
|  |                |                  |                |               |                 |               | SIRPB2   |             | 0.96521     |
|  |                |                  |                |               |                 |               | AMPD2    |             | 0.95767     |
|  |                |                  |                |               |                 |               | BACH2    |             | 0.98620     |
|  |                |                  |                |               |                 |               | DOCK2    |             | 0.95834     |
|  |                |                  |                |               |                 |               | DYRK3    |             | 0.84228     |
|  |                |                  |                |               |                 |               | F13A1    |             | 0.97789     |
|  |                |                  |                |               |                 |               | IL2RB    |             | 0.99088     |
|  |                |                  |                |               |                 |               | NTRK2    |             | 0.91870     |
|  |                |                  |                |               |                 |               | PHACTR1  |             | 0.99465     |
|  |                |                  |                |               |                 |               | PIK3CG   |             | 0.98028     |
|  |                |                  |                |               |                 |               | PREX2    |             | 0.92706     |
|  |                |                  |                |               |                 |               | RPGRI1   |             | 0.96889     |
|  |                |                  |                |               |                 |               | TRAF3    |             | 0.98289     |
|  |                |                  |                |               |                 |               | TULP4    |             | 0.98295     |
|  |                |                  |                |               |                 |               | WDFY4    |             | 0.98765     |
|  |                |                  |                |               |                 |               | GXYLT2   |             | 0.98995     |
|  |                |                  |                |               |                 |               | PEAK1    |             | 0.91908     |
|  |                |                  |                |               |                 |               | ACAP1    |             | 0.95522     |
|  |                |                  |                |               |                 |               | ARHGAP30 |             | 0.99130     |
|  |                |                  |                |               |                 |               | CYB561D1 |             | 0.96051     |
|  |                |                  |                |               |                 |               | HCFC1    |             | 0.93112     |
|  |                |                  |                |               |                 |               | IP6K1    |             | 0.95835     |
|  |                |                  |                |               |                 |               | NPR1     |             | 0.96282     |
|  |                |                  |                |               |                 |               | PPP1R16B |             | 0.99718     |
|  |                |                  |                |               |                 |               | SETD1B   |             | 0.95742     |
|  |                |                  |                |               |                 |               | TMC8     |             | 0.97155     |
|  |                |                  |                |               |                 |               | TMEM200A |             | 0.94032     |
|  |                |                  |                |               |                 |               | ZMYND15  |             | 0.96528     |

|  | early_above_70 | early_aged_60_70 | early_below_55 | late_above_70 | late_aged_60_70 | late_below_55 | Probe ID | Description | Correlation |
|--|----------------|------------------|----------------|---------------|-----------------|---------------|----------|-------------|-------------|
|  |                |                  |                |               |                 |               | ACCS     |             | 0.96023     |
|  |                |                  |                |               |                 |               | FAIM2    |             | 0.96780     |
|  |                |                  |                |               |                 |               | FBLN1    |             | 0.98006     |
|  |                |                  |                |               |                 |               | AEN      |             | 0.86678     |
|  |                |                  |                |               |                 |               | EDA2R    |             | 0.97508     |
|  |                |                  |                |               |                 |               | LRP4     |             | 0.82680     |
|  |                |                  |                |               |                 |               | PSD2     |             | 0.84466     |
|  |                |                  |                |               |                 |               | TCF21    |             | 0.95368     |
|  |                |                  |                |               |                 |               | VWA5A    |             | 0.95288     |
|  |                |                  |                |               |                 |               | CXXC1    |             | 0.72751     |

|  | early_above_70 | early_aged_60_70 | early_below_55 | late_above_70 | late_aged_60_70 | late_below_55 | Probe ID | Description | Correlation |
|--|----------------|------------------|----------------|---------------|-----------------|---------------|----------|-------------|-------------|
|  |                |                  |                |               |                 |               | ARID3A   |             | 0.98429     |
|  |                |                  |                |               |                 |               | CPVL     |             | 0.96984     |
|  |                |                  |                |               |                 |               | KIAA1328 |             | 0.95158     |
|  |                |                  |                |               |                 |               | MCCC1    |             | 0.97641     |
|  |                |                  |                |               |                 |               | MDC1     |             | 0.95584     |
|  |                |                  |                |               |                 |               | PTPDC1   |             | 0.92809     |
|  |                |                  |                |               |                 |               | SSH1     |             | 0.94106     |
|  |                |                  |                |               |                 |               | STK10    |             | 0.98638     |
|  |                |                  |                |               |                 |               | TUFT1    |             | 0.96983     |
|  |                |                  |                |               |                 |               | ZC3HAV1  |             | 0.95534     |
|  |                |                  |                |               |                 |               | SLIT3    |             | 0.92057     |
|  |                |                  |                |               |                 |               | BCL11B   |             | 0.97527     |
|  |                |                  |                |               |                 |               | CBX4     |             | 0.96704     |
|  |                |                  |                |               |                 |               | CD84     |             | 0.97354     |
|  |                |                  |                |               |                 |               | DOCK11   |             | 0.96762     |
|  |                |                  |                |               |                 |               | FMO3     |             | 0.95048     |
|  |                |                  |                |               |                 |               | GBP5     |             | 0.98824     |
|  |                |                  |                |               |                 |               | HCK      |             | 0.89364     |
|  |                |                  |                |               |                 |               | HECA     |             | 0.94282     |
|  |                |                  |                |               |                 |               | IL10RA   |             | 0.95509     |
|  |                |                  |                |               |                 |               | PLXNC1   |             | 0.99140     |
|  |                |                  |                |               |                 |               | PRICKLE1 |             | 0.99394     |
|  |                |                  |                |               |                 |               | SESN3    |             | 0.90716     |
|  |                |                  |                |               |                 |               | SLC31A2  |             | 0.96522     |
|  |                |                  |                |               |                 |               | WNT5A    |             | 0.99093     |
|  |                |                  |                |               |                 |               | AGBL4    |             | 0.83920     |
|  |                |                  |                |               |                 |               | ADCY9    |             | 0.98584     |
|  |                |                  |                |               |                 |               | ITGB2    |             | 0.94577     |
|  |                |                  |                |               |                 |               | NCKAP1L  |             | 0.99455     |
|  |                |                  |                |               |                 |               | RAB3A    |             | 0.92729     |

|  | early_above_70 | early_aged_60_70 | early_below_55 | late_above_70 | late_aged_60_70 | late_below_55 | Probe ID | Description | Correlation |
|--|----------------|------------------|----------------|---------------|-----------------|---------------|----------|-------------|-------------|
|  |                |                  |                |               |                 |               | MYO18B   |             | 0.99296     |
|  |                |                  |                |               |                 |               | MACROD2  |             | 0.98853     |
|  |                |                  |                |               |                 |               | PTPRT    |             | 0.97568     |
|  |                |                  |                |               |                 |               | ABO      |             | 0.94905     |
|  |                |                  |                |               |                 |               | NEK10    |             | 0.98003     |

|  | early_above_70 | early_aged_60_70 | early_below_55 | late_above_70 | late_aged_60_70 | late_below_55 | Probe ID | Description | Correlation |
|--|----------------|------------------|----------------|---------------|-----------------|---------------|----------|-------------|-------------|
|  |                |                  |                |               |                 |               | GPATCH1  |             | 0.96550     |
|  |                |                  |                |               |                 |               | HOMER2   |             | 0.91988     |
|  |                |                  |                |               |                 |               | MTO1     |             | 0.96808     |
|  |                |                  |                |               |                 |               | PALLD    |             | 0.91263     |
|  |                |                  |                |               |                 |               | ZNF549   |             | 0.99322     |
|  |                |                  |                |               |                 |               | DOCK1    |             | 0.94266     |
|  |                |                  |                |               |                 |               | EPHA7    |             | 0.98197     |
|  |                |                  |                |               |                 |               | SCN3A    |             | 0.95252     |
|  |                |                  |                |               |                 |               | CEP290   |             | 0.97833     |
|  |                |                  |                |               |                 |               | INPP5F   |             | 0.92521     |
|  |                |                  |                |               |                 |               | NME9     |             | 0.57790     |
|  |                |                  |                |               |                 |               | NUMA1    |             | 0.94450     |

|  | early_above_70 | early_aged_60_70 | early_below_55 | late_above_70 | late_aged_60_70 | late_below_55 | Probe ID | Description | Correlation |
|--|----------------|------------------|----------------|---------------|-----------------|---------------|----------|-------------|-------------|
|  |                |                  |                |               |                 |               | FAM171A1 |             | 0.97887     |
|  |                |                  |                |               |                 |               | GPR55    |             | 0.85371     |
|  |                |                  |                |               |                 |               | NR1H2    |             | 0.98869     |
|  |                |                  |                |               |                 |               | NTN1     |             | 0.93390     |
|  |                |                  |                |               |                 |               | PDE4A    |             | 0.95331     |
|  |                |                  |                |               |                 |               | TSC22D1  |             | 0.95173     |
|  |                |                  |                |               |                 |               | DLL1     |             | 0.99370     |
|  |                |                  |                |               |                 |               | BMP3     |             | 0.76919     |
|  |                |                  |                |               |                 |               | ST18     |             | 0.93473     |

|  | early_above_70 | early_aged_60_70 | early_below_55 | late_above_70 | late_aged_60_70 | late_below_55 | Probe ID | Description | Correlation |
|--|----------------|------------------|----------------|---------------|-----------------|---------------|----------|-------------|-------------|
|  |                |                  |                |               |                 |               | CDC14A   |             | 0.82687     |
|  |                |                  |                |               |                 |               | KLRD1    |             | 0.78058     |
|  |                |                  |                |               |                 |               | MFHAS1   |             | 0.92331     |
|  |                |                  |                |               |                 |               | MOV10L1  |             | 0.88057     |
|  |                |                  |                |               |                 |               | MYO1B    |             | 0.92621     |
|  |                |                  |                |               |                 |               | PDPR     |             | 0.92509     |
|  |                |                  |                |               |                 |               | RALBP1   |             | 0.93430     |
|  |                |                  |                |               |                 |               | SLC36A1  |             | 0.90258     |
|  |                |                  |                |               |                 |               | L3MBTL3  |             | 0.87464     |
|  |                |                  |                |               |                 |               | ARL9     |             | 0.93623     |
|  |                |                  |                |               |                 |               | DIO1     |             | 0.90849     |
|  |                |                  |                |               |                 |               | KCNMB2   |             | 0.92709     |
|  |                |                  |                |               |                 |               | PLD6     |             | 0.88642     |
|  |                |                  |                |               |                 |               | RTN4RL1  |             | 0.94431     |
|  |                |                  |                |               |                 |               | VSTM2L   |             | 0.82228     |
|  |                |                  |                |               |                 |               | WDR55    |             | 0.91712     |
|  |                |                  |                |               |                 |               | WNT8B    |             | 0.94560     |

|  | early_above_70 | early_aged_60_70 | early_below_55 | late_above_70 | late_aged_60_70 | late_below_55 | Probe ID | Description | Correlation |
|--|----------------|------------------|----------------|---------------|-----------------|---------------|----------|-------------|-------------|
|  |                |                  |                |               |                 |               | CEACAM6  |             | 0.93580     |
|  |                |                  |                |               |                 |               | TRPM3    |             | 0.83295     |
|  |                |                  |                |               |                 |               | ABCA12   |             | 0.91197     |
|  |                |                  |                |               |                 |               | RGS13    |             | 0.93732     |
|  |                |                  |                |               |                 |               | DKK1     |             | 0.98689     |
|  |                |                  |                |               |                 |               | S100A14  |             | 0.95461     |

|  | early_above_70 | early_aged_60_70 | early_below_55 | late_above_70 | late_aged_60_70 | late_below_55 | Probe ID | Description | Correlation |
|--|----------------|------------------|----------------|---------------|-----------------|---------------|----------|-------------|-------------|
|  |                |                  |                |               |                 |               | PIH1D2   |             | 0.99497     |
|  |                |                  |                |               |                 |               | CLDN4    |             | 0.97210     |
|  |                |                  |                |               |                 |               | DUSP5    |             | 0.93823     |
|  |                |                  |                |               |                 |               | JUNB     |             | 0.96879     |
|  |                |                  |                |               |                 |               | RND1     |             | 0.86484     |
|  |                |                  |                |               |                 |               | SOCS3    |             | 0.98461     |
|  |                |                  |                |               |                 |               | SLC34A2  |             | 0.89763     |
|  |                |                  |                |               |                 |               | TRHDE    |             | 0.85184     |
|  |                |                  |                |               |                 |               | CXCL2    |             | 0.98250     |
|  |                |                  |                |               |                 |               | RELB     |             | 0.86316     |

|  | early_above_70 | early_aged_60_70 | early_below_55 | late_above_70 | late_aged_60_70 | late_below_55 | Probe ID  | Description | Correlation |
|--|----------------|------------------|----------------|---------------|-----------------|---------------|-----------|-------------|-------------|
|  |                |                  |                |               |                 |               | BAMBI     |             | 0.97502     |
|  |                |                  |                |               |                 |               | CDV3      |             | 0.93700     |
|  |                |                  |                |               |                 |               | LY75      |             | 0.97172     |
|  |                |                  |                |               |                 |               | RAB11FIP4 |             | 0.96808     |
|  |                |                  |                |               |                 |               | RAD18     |             | 0.92988     |
|  |                |                  |                |               |                 |               | SNX24     |             | 0.91162     |
|  |                |                  |                |               |                 |               | TMEM38B   |             | 0.91737     |
|  |                |                  |                |               |                 |               | EPB41L4B  |             | 0.87882     |
|  |                |                  |                |               |                 |               | MYH15     |             | 0.99661     |
|  |                |                  |                |               |                 |               | RGS4      |             | 0.94588     |
|  |                |                  |                |               |                 |               | SMCHD1    |             | 0.90751     |
|  |                |                  |                |               |                 |               | STON2     |             | 0.96737     |
|  |                |                  |                |               |                 |               | TGFBR1    |             | 0.96443     |
|  |                |                  |                |               |                 |               | IGSF21    |             | 0.82382     |
|  |                |                  |                |               |                 |               | AIF1L     |             | 0.94173     |
|  |                |                  |                |               |                 |               | BSN       |             | 0.91192     |
|  |                |                  |                |               |                 |               | JPH1      |             | 0.93555     |
|  |                |                  |                |               |                 |               | SH2D2A    |             | 0.80704     |
|  |                |                  |                |               |                 |               | TM7SF2    |             | 0.90814     |

|  | early_above_70 | early_aged_60_70 | early_below_55 | late_above_70 | late_aged_60_70 | late_below_55 | Probe ID | Description | Correlation |
|--|----------------|------------------|----------------|---------------|-----------------|---------------|----------|-------------|-------------|
|  |                |                  |                |               |                 |               | ADCY2    |             | 0.91929     |
|  |                |                  |                |               |                 |               | CNTNAP1  |             | 0.96023     |
|  |                |                  |                |               |                 |               | LTBP1    |             | 0.91537     |
|  |                |                  |                |               |                 |               | PLA2G4A  |             | 0.97734     |
|  |                |                  |                |               |                 |               | SERPINE1 |             | 0.94504     |
|  |                |                  |                |               |                 |               | RUNX1    |             | 0.96192     |
|  |                |                  |                |               |                 |               | CAMK4    |             | 0.96456     |
|  |                |                  |                |               |                 |               | IL4R     |             | 0.90703     |
|  |                |                  |                |               |                 |               | MREG     |             | 0.98510     |
|  |                |                  |                |               |                 |               | RIN3     |             | 0.94457     |
|  |                |                  |                |               |                 |               | TSPAN7   |             | 0.95567     |
|  |                |                  |                |               |                 |               | GDPD5    |             | 0.88312     |
|  |                |                  |                |               |                 |               | PLVAP    |             | 0.97592     |
|  |                |                  |                |               |                 |               | BTN3A2   |             | 0.94415     |
|  |                |                  |                |               |                 |               | KCNIP4   |             | 0.97948     |
|  |                |                  |                |               |                 |               | LAMA2    |             | 0.93002     |
|  |                |                  |                |               |                 |               | PPM1N    |             | 0.85631     |

|  | early_above_70 | early_aged_60_70 | early_below_55 | late_above_70 | late_aged_60_70 | late_below_55 | Probe ID | Description | Correlation |
|--|----------------|------------------|----------------|---------------|-----------------|---------------|----------|-------------|-------------|
|  |                |                  |                |               |                 |               | FGD3     |             | 0.98952     |
|  |                |                  |                |               |                 |               | LYL1     |             | 0.95631     |
|  |                |                  |                |               |                 |               | PPP2R2B  |             | 0.95055     |
|  |                |                  |                |               |                 |               | SERPINB1 |             | 0.90597     |
|  |                |                  |                |               |                 |               | SKAP1    |             | 0.95038     |
|  |                |                  |                |               |                 |               | UNC13D   |             | 0.98249     |
|  |                |                  |                |               |                 |               | CEP152   |             | 0.85941     |
|  |                |                  |                |               |                 |               | COL5A3   |             | 0.97313     |
|  |                |                  |                |               |                 |               | SFRP4    |             | 0.97048     |
|  |                |                  |                |               |                 |               | SH3BP2   |             | 0.98898     |
|  |                |                  |                |               |                 |               | VAX2     |             | 0.98327     |
|  |                |                  |                |               |                 |               | TSPAN4   |             | 0.96976     |
|  |                |                  |                |               |                 |               | MYO1H    |             | 0.94846     |
|  |                |                  |                |               |                 |               | BST2     |             | 0.98029     |
|  |                |                  |                |               |                 |               | DOK1     |             | 0.98895     |
|  |                |                  |                |               |                 |               | DOK3     |             | 0.97776     |
|  |                |                  |                |               |                 |               | HPSE     |             | 0.97516     |
|  |                |                  |                |               |                 |               | WDR90    |             | 0.95477     |

|  | early_above_70 | early_aged_60_70 | early_below_55 | late_above_70 | late_aged_60_70 | late_below_55 | Probe ID | Description | Correlation |
|--|----------------|------------------|----------------|---------------|-----------------|---------------|----------|-------------|-------------|
|  |                |                  |                |               |                 |               | KCNN4    |             | 0.91065     |
|  |                |                  |                |               |                 |               | RFPL2    |             | 0.84126     |
|  |                |                  |                |               |                 |               | WNT5B    |             | 0.97144     |
|  |                |                  |                |               |                 |               | HTATIP2  |             | 0.97638     |
|  |                |                  |                |               |                 |               | ACSBG1   |             | 0.98026     |
|  |                |                  |                |               |                 |               | ANKRD22  |             | 0.90016     |
|  |                |                  |                |               |                 |               | BIVM     |             | 0.96486     |
|  |                |                  |                |               |                 |               | ISM2     |             | 0.93500     |
|  |                |                  |                |               |                 |               | NECAB1   |             | 0.92035     |
|  |                |                  |                |               |                 |               | SYNDIG1  |             | 0.93068     |
|  |                |                  |                |               |                 |               | MMP15    |             | 0.96598     |
|  |                |                  |                |               |                 |               | CRYAB    |             | 0.95023     |
|  |                |                  |                |               |                 |               | CTF1     |             | 0.98122     |
|  |                |                  |                |               |                 |               | DLGAP1   |             | 0.98853     |
|  |                |                  |                |               |                 |               | OGDHL    |             | 0.98050     |
|  |                |                  |                |               |                 |               | SERF2    |             | 0.94332     |

|  | early_above_70 | early_aged_60_70 | early_below_55 | late_above_70 | late_aged_60_70 | late_below_55 | Probe ID | Description | Correlation |
|--|----------------|------------------|----------------|---------------|-----------------|---------------|----------|-------------|-------------|
|  |                |                  |                |               |                 |               | CCDC80   |             | 0.98795     |
|  |                |                  |                |               |                 |               | DLL4     |             | 0.98918     |
|  |                |                  |                |               |                 |               | ENPP2    |             | 0.96388     |
|  |                |                  |                |               |                 |               | GRB10    |             | 0.98288     |
|  |                |                  |                |               |                 |               | PRDM1    |             | 0.98179     |
|  |                |                  |                |               |                 |               | SOX6     |             | 0.96331     |
|  |                |                  |                |               |                 |               | CAPN2    |             | 0.98163     |
|  |                |                  |                |               |                 |               | ADAMTS12 |             | 0.99698     |
|  |                |                  |                |               |                 |               | ANKRD44  |             | 0.96176     |
|  |                |                  |                |               |                 |               | CCR7     |             | 0.98712     |
|  |                |                  |                |               |                 |               | CD33     |             | 0.93727     |
|  |                |                  |                |               |                 |               | CD74     |             | 0.97544     |
|  |                |                  |                |               |                 |               | MAP1B    |             | 0.96807     |
|  |                |                  |                |               |                 |               | NLRC4    |             | 0.98495     |
|  |                |                  |                |               |                 |               | TTC39B   |             | 0.95046     |
|  |                |                  |                |               |                 |               | C15orf39 |             | 0.92445     |
|  |                |                  |                |               |                 |               | FOXP3    |             | 0.99249     |
|  |                |                  |                |               |                 |               | MB21D2   |             | 0.96495     |

|  | early_above_70 | early_aged_60_70 | early_below_55 | late_above_70 | late_aged_60_70 | late_below_55 | Probe ID  | Description | Correlation |
|--|----------------|------------------|----------------|---------------|-----------------|---------------|-----------|-------------|-------------|
|  |                |                  |                |               |                 |               | CHN2      |             | 0.82425     |
|  |                |                  |                |               |                 |               | PPP1R1B   |             | 0.95400     |
|  |                |                  |                |               |                 |               | AGR2      |             | 0.94776     |
|  |                |                  |                |               |                 |               | CAV1      |             | 0.94708     |
|  |                |                  |                |               |                 |               | CYP2E1    |             | 0.88827     |
|  |                |                  |                |               |                 |               | LPAR6     |             | 0.88506     |
|  |                |                  |                |               |                 |               | P2RX1     |             | 0.92292     |
|  |                |                  |                |               |                 |               | RND2      |             | 0.90201     |
|  |                |                  |                |               |                 |               | TMPRSS11E |             | 0.92770     |
|  |                |                  |                |               |                 |               | IRX4      |             | 0.97321     |
|  |                |                  |                |               |                 |               | CXXC4     |             | 0.86776     |
|  |                |                  |                |               |                 |               | EIF3I     |             | 0.91423     |
|  |                |                  |                |               |                 |               | PCP2      |             | 0.97406     |
|  |                |                  |                |               |                 |               | PDE9A     |             | 0.95610     |
|  |                |                  |                |               |                 |               | SLC16A5   |             | 0.96331     |

|  | early_above_70 | early_aged_60_70 | early_below_55 | late_above_70 | late_aged_60_70 | late_below_55 | Probe ID | Description | Correlation |
|--|----------------|------------------|----------------|---------------|-----------------|---------------|----------|-------------|-------------|
|  |                |                  |                |               |                 |               | CXCL13   |             | 0.83841     |
|  |                |                  |                |               |                 |               | GOLT1A   |             | 0.88459     |
|  |                |                  |                |               |                 |               | BDKRB1   |             | 0.84043     |
|  |                |                  |                |               |                 |               | CCDC150  |             | 0.88528     |
|  |                |                  |                |               |                 |               | EDAR     |             | 0.92849     |
|  |                |                  |                |               |                 |               | FAM171B  |             | 0.90108     |
|  |                |                  |                |               |                 |               | ITM2A    |             | 0.95198     |
|  |                |                  |                |               |                 |               | MYO3B    |             | 0.88342     |
|  |                |                  |                |               |                 |               | PTGFR    |             | 0.87041     |
|  |                |                  |                |               |                 |               | SIRPG    |             | 0.80375     |
|  |                |                  |                |               |                 |               | TNFAIP6  |             | 0.93681     |
|  |                |                  |                |               |                 |               | TNN      |             | 0.80268     |
|  |                |                  |                |               |                 |               | FGF9     |             | 0.92498     |
|  |                |                  |                |               |                 |               | FOXH1    |             | 0.92203     |
|  |                |                  |                |               |                 |               | SLC39A5  |             | 0.89062     |
|  |                |                  |                |               |                 |               | TRIM54   |             | 0.92416     |

|  | early_above_70 | early_aged_60_70 | early_below_55 | late_above_70 | late_aged_60_70 | late_below_55 | Probe ID | Description | Correlation |
|--|----------------|------------------|----------------|---------------|-----------------|---------------|----------|-------------|-------------|
|  |                |                  |                |               |                 |               | C12orf49 |             | 0.99157     |
|  |                |                  |                |               |                 |               | CAMSAP1  |             | 0.99013     |
|  |                |                  |                |               |                 |               | LASP1    |             | 0.99146     |
|  |                |                  |                |               |                 |               | MAGI3    |             | 0.94093     |
|  |                |                  |                |               |                 |               | MAP3K1   |             | 0.96062     |
|  |                |                  |                |               |                 |               | MAP3K9   |             | 0.93592     |
|  |                |                  |                |               |                 |               | OXCT1    |             | 0.99443     |
|  |                |                  |                |               |                 |               | STK35    |             | 0.97684     |
|  |                |                  |                |               |                 |               | TFRC     |             | 0.96065     |
|  |                |                  |                |               |                 |               | TTF2     |             | 0.97576     |
|  |                |                  |                |               |                 |               | ZMIZ1    |             | 0.99884     |
|  |                |                  |                |               |                 |               | FGD6     |             | 0.88170     |
|  |                |                  |                |               |                 |               | ITGA4    |             | 0.89810     |
|  |                |                  |                |               |                 |               | RAPGEF1  |             | 0.96942     |
|  |                |                  |                |               |                 |               | RBMS2    |             | 0.93284     |
|  |                |                  |                |               |                 |               | SKIL     |             | 0.97412     |
|  |                |                  |                |               |                 |               | TNFAIP3  |             | 0.95799     |
|  |                |                  |                |               |                 |               | WNT11    |             | 0.96799     |
|  |                |                  |                |               |                 |               | NOXO1    |             | 0.96201     |
|  |                |                  |                |               |                 |               | PICX     |             | 0.94485     |
|  |                |                  |                |               |                 |               | IL4I1    |             | 0.93443     |
|  |                |                  |                |               |                 |               | KBTBD8   |             | 0.88328     |
|  |                |                  |                |               |                 |               | MMGT1    |             | 0.97487     |
|  |                |                  |                |               |                 |               | RASGRP1  |             | 0.99125     |
|  |                |                  |                |               |                 |               | SLC6A9   |             | 0.98885     |
|  |                |                  |                |               |                 |               | TDRD7    |             | 0.96449     |
|  |                |                  |                |               |                 |               | TRIB1    |             | 0.98038     |
|  |                |                  |                |               |                 |               | ZBTB7B   |             | 0.97124     |

|  | early_above_70 | early_aged_60_70 | early_below_55 | late_above_70 | late_aged_60_70 | late_below_55 | Probe ID  | Description | Correlation |
|--|----------------|------------------|----------------|---------------|-----------------|---------------|-----------|-------------|-------------|
|  |                |                  |                |               |                 |               | CCNG1     |             | 0.91409     |
|  |                |                  |                |               |                 |               | COPZ2     |             | 0.94394     |
|  |                |                  |                |               |                 |               | DLGAP3    |             | 0.93724     |
|  |                |                  |                |               |                 |               | EGR1      |             | 0.97557     |
|  |                |                  |                |               |                 |               | TNFRSF10B |             | 0.96255     |
|  |                |                  |                |               |                 |               | TP53      |             | 0.96204     |
|  |                |                  |                |               |                 |               | TUBB2B    |             | 0.95720     |
|  |                |                  |                |               |                 |               | IER2      |             | 0.96710     |
|  |                |                  |                |               |                 |               | ATF3      |             | 0.96490     |
|  |                |                  |                |               |                 |               | FOS       |             | 0.98866     |
|  |                |                  |                |               |                 |               | SLC5A10   |             | 0.82222     |
|  |                |                  |                |               |                 |               | EGR3      |             | 0.92482     |
|  |                |                  |                |               |                 |               | IMPDH2    |             | 0.86162     |
|  |                |                  |                |               |                 |               | NRTN      |             | 0.83819     |
|  |                |                  |                |               |                 |               | PDLIM4    |             | 0.90595     |
|  |                |                  |                |               |                 |               | CT62      |             | 0.75457     |
|  |                |                  |                |               |                 |               | EFNB2     |             | 0.93986     |
|  |                |                  |                |               |                 |               | F2RL1     |             | 0.91928     |
|  |                |                  |                |               |                 |               | HBEGF     |             | 0.94055     |
|  |                |                  |                |               |                 |               | JUN       |             | 0.88750     |
|  |                |                  |                |               |                 |               | NMB       |             | 0.85806     |
|  |                |                  |                |               |                 |               | POLD4     |             | 0.96880     |
|  |                |                  |                |               |                 |               | SIT1      |             | 0.81569     |
|  |                |                  |                |               |                 |               | TST       |             | 0.98510     |
|  |                |                  |                |               |                 |               | VPS37B    |             | 0.96088     |



|  | early_above_70 | early_aged_60_70 | early_below_55 | late_above_70 | late_aged_60_70 | late_below_55 | Probe ID | Description | Correlation |
|--|----------------|------------------|----------------|---------------|-----------------|---------------|----------|-------------|-------------|
|  |                |                  |                |               |                 |               | DYRK2    |             | 0.94561     |
|  |                |                  |                |               |                 |               | SAT1     |             | 0.86557     |
|  |                |                  |                |               |                 |               | CHAF1A   |             | 0.99177     |
|  |                |                  |                |               |                 |               | PCDHB4   |             | 0.95961     |
|  |                |                  |                |               |                 |               | BPGM     |             | 0.98850     |
|  |                |                  |                |               |                 |               | PARD6B   |             | 0.98319     |
|  |                |                  |                |               |                 |               | PLAU     |             | 0.81611     |
|  |                |                  |                |               |                 |               | SLC9A6   |             | 0.98889     |

|  | early_above_70 | early_aged_60_70 | early_below_55 | late_above_70 | late_aged_60_70 | late_below_55 | Probe ID | Description | Correlation |
|--|----------------|------------------|----------------|---------------|-----------------|---------------|----------|-------------|-------------|
|  |                |                  |                |               |                 |               | KITLG    |             | 0.95908     |
|  |                |                  |                |               |                 |               | SPATS2L  |             | 0.92517     |
|  |                |                  |                |               |                 |               | CAMK1D   |             | 0.95860     |
|  |                |                  |                |               |                 |               | ADAMTSL3 |             | 0.97422     |
|  |                |                  |                |               |                 |               | ANK2     |             | 0.97210     |
|  |                |                  |                |               |                 |               | DLX5     |             | 0.96886     |
|  |                |                  |                |               |                 |               | KCNK13   |             | 0.99274     |
|  |                |                  |                |               |                 |               | MARK1    |             | 0.96377     |
|  |                |                  |                |               |                 |               | PTK7     |             | 0.97406     |
|  |                |                  |                |               |                 |               | SEMA5A   |             | 0.96480     |
|  |                |                  |                |               |                 |               | CDC42SE1 |             | 0.96106     |
|  |                |                  |                |               |                 |               | SLC35F3  |             | 0.78053     |

|  | early_above_70 | early_aged_60_70 | early_below_55 | late_above_70 | late_aged_60_70 | late_below_55 | Probe ID | Description | Correlation |
|--|----------------|------------------|----------------|---------------|-----------------|---------------|----------|-------------|-------------|
|  |                |                  |                |               |                 |               | KLHDC4   |             | 0.94989     |
|  |                |                  |                |               |                 |               | SH3RF2   |             | 0.98234     |
|  |                |                  |                |               |                 |               | KRT8     |             | 0.99342     |
|  |                |                  |                |               |                 |               | FKBP2    |             | 0.98691     |
|  |                |                  |                |               |                 |               | COL17A1  |             | 0.90837     |
|  |                |                  |                |               |                 |               | RNF175   |             | 0.92113     |
|  |                |                  |                |               |                 |               | SFN      |             | 0.92404     |
|  |                |                  |                |               |                 |               | MT1M     |             | 0.99351     |
|  |                |                  |                |               |                 |               | NTRK1    |             | 0.98259     |

|  | early_above_70 | early_aged_60_70 | early_below_55 | late_above_70 | late_aged_60_70 | late_below_55 | Probe ID | Description | Correlation |
|--|----------------|------------------|----------------|---------------|-----------------|---------------|----------|-------------|-------------|
|  |                |                  |                |               |                 |               | DLG5     |             | 0.92738     |
|  |                |                  |                |               |                 |               | GLUL     |             | 0.94633     |
|  |                |                  |                |               |                 |               | RIN2     |             | 0.94464     |
|  |                |                  |                |               |                 |               | SARM1    |             | 0.98100     |
|  |                |                  |                |               |                 |               | SGSM2    |             | 0.98438     |
|  |                |                  |                |               |                 |               | ANKRD36  |             | 0.95471     |
|  |                |                  |                |               |                 |               | ASAP3    |             | 0.97603     |
|  |                |                  |                |               |                 |               | DSC1     |             | 0.97050     |
|  |                |                  |                |               |                 |               | SYT2     |             | 0.98179     |
|  |                |                  |                |               |                 |               | RAPH1    |             | 0.95698     |
|  |                |                  |                |               |                 |               | ABCC10   |             | 0.98942     |
|  |                |                  |                |               |                 |               | SCN5A    |             | 0.98097     |
|  |                |                  |                |               |                 |               | SLC29A2  |             | 0.74274     |
|  |                |                  |                |               |                 |               | SLC29A3  |             | 0.93232     |

|  | early_above_70 | early_aged_60_70 | early_below_55 | late_above_70 | late_aged_60_70 | late_below_55 | Probe ID | Description | Correlation |
|--|----------------|------------------|----------------|---------------|-----------------|---------------|----------|-------------|-------------|
|  |                |                  |                |               |                 |               | ABCC5    |             | 0.97271     |
|  |                |                  |                |               |                 |               | ADAMTS2  |             | 0.98496     |
|  |                |                  |                |               |                 |               | COL10A1  |             | 0.98460     |
|  |                |                  |                |               |                 |               | COL1A1   |             | 0.98371     |
|  |                |                  |                |               |                 |               | ELMO1    |             | 0.96475     |
|  |                |                  |                |               |                 |               | FXD5     |             | 0.96416     |
|  |                |                  |                |               |                 |               | IFFO1    |             | 0.97623     |
|  |                |                  |                |               |                 |               | ITGA11   |             | 0.97619     |
|  |                |                  |                |               |                 |               | LOXL3    |             | 0.94458     |
|  |                |                  |                |               |                 |               | MFGE8    |             | 0.97527     |
|  |                |                  |                |               |                 |               | MMP11    |             | 0.97521     |
|  |                |                  |                |               |                 |               | PAQR5    |             | 0.99364     |
|  |                |                  |                |               |                 |               | SPI1     |             | 0.92807     |
|  |                |                  |                |               |                 |               | RAP2B    |             | 0.98636     |
|  |                |                  |                |               |                 |               | ABHD12   |             | 0.97405     |
|  |                |                  |                |               |                 |               | ARHGAP4  |             | 0.96763     |
|  |                |                  |                |               |                 |               | ASPN     |             | 0.97692     |
|  |                |                  |                |               |                 |               | CD2      |             | 0.93987     |
|  |                |                  |                |               |                 |               | CLEC2B   |             | 0.95740     |
|  |                |                  |                |               |                 |               | COL4A2   |             | 0.95656     |
|  |                |                  |                |               |                 |               | GLIS2    |             | 0.97420     |
|  |                |                  |                |               |                 |               | GZMK     |             | 0.96625     |
|  |                |                  |                |               |                 |               | IFI44L   |             | 0.96228     |
|  |                |                  |                |               |                 |               | IL18     |             | 0.96714     |
|  |                |                  |                |               |                 |               | KCNAB2   |             | 0.98116     |
|  |                |                  |                |               |                 |               | LMO2     |             | 0.98922     |
|  |                |                  |                |               |                 |               | LY9      |             | 0.99129     |
|  |                |                  |                |               |                 |               | NOX4     |             | 0.98913     |
|  |                |                  |                |               |                 |               | SLC17A9  |             | 0.98369     |
|  |                |                  |                |               |                 |               | TGFB1    |             | 0.98855     |
|  |                |                  |                |               |                 |               | VCAN     |             | 0.96959     |
|  |                |                  |                |               |                 |               | WNT2B    |             | 0.96754     |
|  |                |                  |                |               |                 |               | GMFG     |             | 0.97123     |
|  |                |                  |                |               |                 |               | SVEP1    |             | 0.94856     |
|  |                |                  |                |               |                 |               | NINJ2    |             | 0.97327     |
|  |                |                  |                |               |                 |               | ENO2     |             | 0.96938     |
|  |                |                  |                |               |                 |               | FSTL3    |             | 0.90789     |
|  |                |                  |                |               |                 |               | HRH1     |             | 0.93103     |
|  |                |                  |                |               |                 |               | IL34     |             | 0.95108     |
|  |                |                  |                |               |                 |               | RHBDF2   |             | 0.98799     |
|  |                |                  |                |               |                 |               | RTP4     |             | 0.95177     |
|  |                |                  |                |               |                 |               | TMEM106C |             | 0.97438     |
|  |                |                  |                |               |                 |               | TPST1    |             | 0.98002     |

|  | early_above_70 | early_aged_60_70 | early_below_55 | late_above_70 | late_aged_60_70 | late_below_55 | Probe ID | Description | Correlation |
|--|----------------|------------------|----------------|---------------|-----------------|---------------|----------|-------------|-------------|
|  |                |                  |                |               |                 |               | ALPK3    |             | 0.99339     |
|  |                |                  |                |               |                 |               | CDK19    |             | 0.95782     |
|  |                |                  |                |               |                 |               | ERG      |             | 0.98911     |
|  |                |                  |                |               |                 |               | GULP1    |             | 0.98978     |
|  |                |                  |                |               |                 |               | HDAC1    |             | 0.98979     |
|  |                |                  |                |               |                 |               | LMTK3    |             | 0.90501     |
|  |                |                  |                |               |                 |               | RAB11A   |             | 0.96821     |
|  |                |                  |                |               |                 |               | SNX14    |             | 0.97879     |
|  |                |                  |                |               |                 |               | WBP4     |             | 0.97513     |
|  |                |                  |                |               |                 |               | CACNA1B  |             | 0.93990     |
|  |                |                  |                |               |                 |               | CCNJ     |             | 0.98815     |
|  |                |                  |                |               |                 |               | COX16    |             | 0.98537     |
|  |                |                  |                |               |                 |               | EDN3     |             | 0.86828     |
|  |                |                  |                |               |                 |               | FHL1     |             | 0.96044     |
|  |                |                  |                |               |                 |               | FMN2     |             | 0.81150     |
|  |                |                  |                |               |                 |               | KCNG1    |             | 0.96163     |
|  |                |                  |                |               |                 |               | LIX1     |             | 0.84622     |
|  |                |                  |                |               |                 |               | MTRF1    |             | 0.97128     |
|  |                |                  |                |               |                 |               | PDE6A    |             | 0.86441     |
|  |                |                  |                |               |                 |               | PECR     |             | 0.96500     |
|  |                |                  |                |               |                 |               | PLA2G7   |             | 0.94884     |
|  |                |                  |                |               |                 |               | SH3GL2   |             | 0.87053     |
|  |                |                  |                |               |                 |               | UNC5D    |             | 0.87668     |
|  |                |                  |                |               |                 |               | IL5RA    |             | 0.98419     |
|  |                |                  |                |               |                 |               | NEB      |             | 0.99383     |
|  |                |                  |                |               |                 |               | GSDMD    |             | 0.83406     |
|  |                |                  |                |               |                 |               | NDRG1    |             | 0.98307     |
|  |                |                  |                |               |                 |               | RGMB     |             | 0.94684     |
|  |                |                  |                |               |                 |               | RGS9BP   |             | 0.97239     |

|  | early_above_70 | early_aged_60_70 | early_below_55 | late_above_70 | late_aged_60_70 | late_below_55 | Probe ID | Description | Correlation |
|--|----------------|------------------|----------------|---------------|-----------------|---------------|----------|-------------|-------------|
|  |                |                  |                |               |                 |               | EXTL3    |             | 0.97286     |
|  |                |                  |                |               |                 |               | FBXO31   |             | 0.98076     |
|  |                |                  |                |               |                 |               | UNC5A    |             | 0.94846     |
|  |                |                  |                |               |                 |               | ALDH3B2  |             | 0.95969     |
|  |                |                  |                |               |                 |               | ARHGAP44 |             | 0.95291     |
|  |                |                  |                |               |                 |               | CD99L2   |             | 0.98016     |
|  |                |                  |                |               |                 |               | DAGLA    |             | 0.97945     |
|  |                |                  |                |               |                 |               | IGFBP2   |             | 0.69546     |
|  |                |                  |                |               |                 |               | IL7      |             | 0.98477     |
|  |                |                  |                |               |                 |               | MMACHC   |             | 0.97597     |
|  |                |                  |                |               |                 |               | PYROXD1  |             | 0.96926     |
|  |                |                  |                |               |                 |               | RIMS3    |             | 0.99084     |
|  |                |                  |                |               |                 |               | TRPM6    |             | 0.97649     |
|  |                |                  |                |               |                 |               | WDR59    |             | 0.99277     |
|  |                |                  |                |               |                 |               | BDH1     |             | 0.98031     |
|  |                |                  |                |               |                 |               | MFSD5    |             | 0.96815     |
|  |                |                  |                |               |                 |               | NOL9     |             | 0.99541     |
|  |                |                  |                |               |                 |               | SLC24A3  |             | 0.73965     |

|  | early_above_70 | early_aged_60_70 | early_below_55 | late_above_70 | late_aged_60_70 | late_below_55 | Probe ID | Description | Correlation |
|--|----------------|------------------|----------------|---------------|-----------------|---------------|----------|-------------|-------------|
|  |                |                  |                |               |                 |               | SECTM1   |             | 0.80559     |
|  |                |                  |                |               |                 |               | ACTN2    |             | 0.96303     |
|  |                |                  |                |               |                 |               | ALDH3A1  |             | 0.90078     |
|  |                |                  |                |               |                 |               | RGS18    |             | 0.94136     |
|  |                |                  |                |               |                 |               | SOD3     |             | 0.90436     |
|  |                |                  |                |               |                 |               | GAL3ST3  |             | 0.93208     |

|  | early_above_70 | early_aged_60_70 | early_below_55 | late_above_70 | late_aged_60_70 | late_below_55 | Probe ID | Description | Correlation |
|--|----------------|------------------|----------------|---------------|-----------------|---------------|----------|-------------|-------------|
|  |                |                  |                |               |                 |               | ACRV1    |             | 0.68853     |
|  |                |                  |                |               |                 |               | CDH17    |             | 0.86065     |
|  |                |                  |                |               |                 |               | NDUFA2   |             | 0.86699     |
|  |                |                  |                |               |                 |               | NUTF2    |             | 0.94811     |
|  |                |                  |                |               |                 |               | PACRG    |             | 0.70480     |
|  |                |                  |                |               |                 |               | SHC3     |             | 0.92861     |
|  |                |                  |                |               |                 |               | AMBP     |             | 0.73400     |
|  |                |                  |                |               |                 |               | AMDHD1   |             | 0.89303     |
|  |                |                  |                |               |                 |               | ART4     |             | 0.90270     |
|  |                |                  |                |               |                 |               | CLDN10   |             | 0.90676     |
|  |                |                  |                |               |                 |               | DMC1     |             | 0.82599     |
|  |                |                  |                |               |                 |               | GAL3ST1  |             | 0.81320     |
|  |                |                  |                |               |                 |               | KREMEN2  |             | 0.96005     |
|  |                |                  |                |               |                 |               | METTL24  |             | 0.94728     |
|  |                |                  |                |               |                 |               | NLRP2    |             | 0.89023     |
|  |                |                  |                |               |                 |               | PSMB3    |             | 0.74738     |
|  |                |                  |                |               |                 |               | TSPO     |             | 0.91212     |
|  |                |                  |                |               |                 |               | C4orf47  |             | 0.95245     |
|  |                |                  |                |               |                 |               | CTXN1    |             | 0.94878     |
|  |                |                  |                |               |                 |               | GTF2F2   |             | 0.92534     |
|  |                |                  |                |               |                 |               | RPS4Y1   |             | 0.96655     |
|  |                |                  |                |               |                 |               | VSIG2    |             | 0.82479     |

|  | early_above_70 | early_aged_60_70 | early_below_55 | late_above_70 | late_aged_60_70 | late_below_55 | Probe ID | Description | Correlation |
|--|----------------|------------------|----------------|---------------|-----------------|---------------|----------|-------------|-------------|
|  |                |                  |                |               |                 |               | ADAMTS6  |             | 0.99256     |
|  |                |                  |                |               |                 |               | CSPP1    |             | 0.93333     |
|  |                |                  |                |               |                 |               | FANCE    |             | 0.99385     |
|  |                |                  |                |               |                 |               | FRY      |             | 0.98705     |
|  |                |                  |                |               |                 |               | MRPS28   |             | 0.97151     |
|  |                |                  |                |               |                 |               | PHTF2    |             | 0.97392     |
|  |                |                  |                |               |                 |               | PIWIL4   |             | 0.96328     |
|  |                |                  |                |               |                 |               | PTPN12   |             | 0.91432     |
|  |                |                  |                |               |                 |               | SLC29A1  |             | 0.97292     |
|  |                |                  |                |               |                 |               | LBH      |             | 0.96425     |
|  |                |                  |                |               |                 |               | ADAP1    |             | 0.96132     |
|  |                |                  |                |               |                 |               | CD37     |             | 0.96427     |
|  |                |                  |                |               |                 |               | CST7     |             | 0.96017     |
|  |                |                  |                |               |                 |               | IFIT3    |             | 0.94229     |
|  |                |                  |                |               |                 |               | MSR1     |             | 0.98991     |
|  |                |                  |                |               |                 |               | SDS      |             | 0.91989     |
|  |                |                  |                |               |                 |               | SNX8     |             | 0.94746     |
|  |                |                  |                |               |                 |               | CPLX1    |             | 0.98822     |
|  |                |                  |                |               |                 |               | DSN1     |             | 0.96416     |
|  |                |                  |                |               |                 |               | IFI30    |             | 0.94901     |
|  |                |                  |                |               |                 |               | OAS3     |             | 0.96455     |
|  |                |                  |                |               |                 |               | TRIM69   |             | 0.96593     |

|  | early_above_70 | early_aged_60_70 | early_below_55 | late_above_70 | late_aged_60_70 | late_below_55 | Probe ID | Description | Correlation |
|--|----------------|------------------|----------------|---------------|-----------------|---------------|----------|-------------|-------------|
|  |                |                  |                |               |                 |               | AJUBA    |             | 0.96186     |
|  |                |                  |                |               |                 |               | GAS7     |             | 0.95828     |
|  |                |                  |                |               |                 |               | SMAD6    |             | 0.98258     |
|  |                |                  |                |               |                 |               | NUDT17   |             | 0.97980     |
|  |                |                  |                |               |                 |               | CHN1     |             | 0.99074     |
|  |                |                  |                |               |                 |               | EFNB3    |             | 0.96890     |
|  |                |                  |                |               |                 |               | LURAP1L  |             | 0.97458     |
|  |                |                  |                |               |                 |               | SLAMF1   |             | 0.89333     |
|  |                |                  |                |               |                 |               | MUS81    |             | 0.96654     |
|  |                |                  |                |               |                 |               | RCN3     |             | 0.94529     |
|  |                |                  |                |               |                 |               | C17orf67 |             | 0.98881     |
|  |                |                  |                |               |                 |               | CD8A     |             | 0.97647     |
|  |                |                  |                |               |                 |               | DHFR     |             | 0.98079     |
|  |                |                  |                |               |                 |               | SLC25A34 |             | 0.99084     |
|  |                |                  |                |               |                 |               | VSIG10   |             | 0.89591     |
|  |                |                  |                |               |                 |               | ZC3H12D  |             | 0.90297     |

|  | early_above_70 | early_aged_60_70 | early_below_55 | late_above_70 | late_aged_60_70 | late_below_55 | Probe ID | Description | Correlation |
|--|----------------|------------------|----------------|---------------|-----------------|---------------|----------|-------------|-------------|
|  |                |                  |                |               |                 |               | KCNK1    |             | 0.89458     |
|  |                |                  |                |               |                 |               | HRC      |             | 0.95784     |
|  |                |                  |                |               |                 |               | FAM71E1  |             | 0.97756     |
|  |                |                  |                |               |                 |               | SPHK1    |             | 0.95447     |

|  | early_above_70 | early_aged_60_70 | early_below_55 | late_above_70 | late_aged_60_70 | late_below_55 | Probe ID | Description | Correlation |
|--|----------------|------------------|----------------|---------------|-----------------|---------------|----------|-------------|-------------|
|  |                |                  |                |               |                 |               | KIF22    |             | 0.93750     |
|  |                |                  |                |               |                 |               | FAM136A  |             | 0.95575     |
|  |                |                  |                |               |                 |               | KIAA0319 |             | 0.71347     |
|  |                |                  |                |               |                 |               | NCAM1    |             | 0.96189     |
|  |                |                  |                |               |                 |               | UQCRCQ   |             | 0.95670     |
|  |                |                  |                |               |                 |               | ACSL5    |             | 0.98390     |
|  |                |                  |                |               |                 |               | BRF2     |             | 0.92193     |
|  |                |                  |                |               |                 |               | FBP1     |             | 0.84615     |
|  |                |                  |                |               |                 |               | NACA     |             | 0.94845     |
|  |                |                  |                |               |                 |               | SAPCD2   |             | 0.89152     |
|  |                |                  |                |               |                 |               | ZDHHC13  |             | 0.99234     |

|  | early_above_70 | early_aged_60_70 | early_below_55 | late_above_70 | late_aged_60_70 | late_below_55 | Probe ID | Description | Correlation |
|--|----------------|------------------|----------------|---------------|-----------------|---------------|----------|-------------|-------------|
|  |                |                  |                |               |                 |               | BHLHE40  |             | 0.95961     |
|  |                |                  |                |               |                 |               | CLIC5    |             | 0.97577     |
|  |                |                  |                |               |                 |               | DBP      |             | 0.91254     |
|  |                |                  |                |               |                 |               | NEK11    |             | 0.97081     |
|  |                |                  |                |               |                 |               | TTL      |             | 0.98434     |
|  |                |                  |                |               |                 |               | C19orf38 |             | 0.97889     |
|  |                |                  |                |               |                 |               | XPO6     |             | 0.98775     |
|  |                |                  |                |               |                 |               | HGF      |             | 0.99316     |
|  |                |                  |                |               |                 |               | IL13RA1  |             | 0.99668     |
|  |                |                  |                |               |                 |               | IL13RA2  |             | 0.95460     |
|  |                |                  |                |               |                 |               | ITK      |             | 0.96153     |
|  |                |                  |                |               |                 |               | PTPRC    |             | 0.97874     |
|  |                |                  |                |               |                 |               | SAMHD1   |             | 0.95451     |
|  |                |                  |                |               |                 |               | PFKFB2   |             | 0.95253     |

|  | early_above_70 | early_aged_60_70 | early_below_55 | late_above_70 | late_aged_60_70 | late_below_55 | Probe ID | Description | Correlation |
|--|----------------|------------------|----------------|---------------|-----------------|---------------|----------|-------------|-------------|
|  |                |                  |                |               |                 |               | ID1      |             | 0.98511     |
|  |                |                  |                |               |                 |               | TP73     |             | 0.97509     |
|  |                |                  |                |               |                 |               | CCDC12   |             | 0.92997     |
|  |                |                  |                |               |                 |               | CYBA     |             | 0.90017     |
|  |                |                  |                |               |                 |               | PHLDA3   |             | 0.95549     |
|  |                |                  |                |               |                 |               | S100A4   |             | 0.93197     |
|  |                |                  |                |               |                 |               | S100A6   |             | 0.99287     |

|  | early_above_70 | early_aged_60_70 | early_below_55 | late_above_70 | late_aged_60_70 | late_below_55 | Probe ID | Description | Correlation |
|--|----------------|------------------|----------------|---------------|-----------------|---------------|----------|-------------|-------------|
|  |                |                  |                |               |                 |               | CISH     |             | 0.92900     |
|  |                |                  |                |               |                 |               | ADTRP    |             | 0.92414     |
|  |                |                  |                |               |                 |               | BBOX1    |             | 0.94868     |
|  |                |                  |                |               |                 |               | CPLX2    |             | 0.63035     |
|  |                |                  |                |               |                 |               | DUSP9    |             | 0.75843     |
|  |                |                  |                |               |                 |               | HOXA5    |             | 0.91599     |
|  |                |                  |                |               |                 |               | KCNK2    |             | 0.94945     |
|  |                |                  |                |               |                 |               | RASSF7   |             | 0.94770     |
|  |                |                  |                |               |                 |               | EPHB4    |             | 0.96727     |
|  |                |                  |                |               |                 |               | HSF4     |             | 0.87253     |
|  |                |                  |                |               |                 |               | RPL11    |             | 0.91919     |
|  |                |                  |                |               |                 |               | RPL18    |             | 0.93470     |
|  |                |                  |                |               |                 |               | RPL9     |             | 0.85197     |
|  |                |                  |                |               |                 |               | RPS23    |             | 0.95949     |
|  |                |                  |                |               |                 |               | RPS24    |             | 0.96297     |
|  |                |                  |                |               |                 |               | STYXL1   |             | 0.84030     |

|  | early_above_70 | early_aged_60_70 | early_below_55 | late_above_70 | late_aged_60_70 | late_below_55 | Probe ID | Description | Correlation |
|--|----------------|------------------|----------------|---------------|-----------------|---------------|----------|-------------|-------------|
|  |                |                  |                |               |                 |               | ASXL3    |             | 0.85121     |
|  |                |                  |                |               |                 |               | CCDC25   |             | 0.97436     |
|  |                |                  |                |               |                 |               | INHBE    |             | 0.98486     |
|  |                |                  |                |               |                 |               | KLF4     |             | 0.96352     |
|  |                |                  |                |               |                 |               | PEBP4    |             | 0.97696     |
|  |                |                  |                |               |                 |               | SFTPD    |             | 0.96680     |
|  |                |                  |                |               |                 |               | CD38     |             | 0.99476     |
|  |                |                  |                |               |                 |               | PRRG4    |             | 0.96938     |
|  |                |                  |                |               |                 |               | PYGB     |             | 0.99105     |
|  |                |                  |                |               |                 |               | SNPH     |             | 0.96557     |
|  |                |                  |                |               |                 |               | ST8SIA6  |             | 0.95246     |
|  |                |                  |                |               |                 |               | ZG16B    |             | 0.98575     |

|  | early_above_70 | early_aged_60_70 | early_below_55 | late_above_70 | late_aged_60_70 | late_below_55 | Probe ID  | Description | Correlation |
|--|----------------|------------------|----------------|---------------|-----------------|---------------|-----------|-------------|-------------|
|  |                |                  |                |               |                 |               | C12orf57  |             | 0.85894     |
|  |                |                  |                |               |                 |               | ATP8A2    |             | 0.82854     |
|  |                |                  |                |               |                 |               | BEX1      |             | 0.79534     |
|  |                |                  |                |               |                 |               | C4orf19   |             | 0.60097     |
|  |                |                  |                |               |                 |               | EBPL      |             | 0.99192     |
|  |                |                  |                |               |                 |               | HHIPL2    |             | 0.84883     |
|  |                |                  |                |               |                 |               | INA       |             | 0.95624     |
|  |                |                  |                |               |                 |               | KIAA0895L |             | 0.90546     |
|  |                |                  |                |               |                 |               | MAL       |             | 0.98372     |
|  |                |                  |                |               |                 |               | NOL3      |             | 0.96353     |
|  |                |                  |                |               |                 |               | NYAP1     |             | 0.97145     |
|  |                |                  |                |               |                 |               | SMTN      |             | 0.97212     |

|  | early_above_70 | early_aged_60_70 | early_below_55 | late_above_70 | late_aged_60_70 | late_below_55 | Probe ID | Description | Correlation |
|--|----------------|------------------|----------------|---------------|-----------------|---------------|----------|-------------|-------------|
|  |                |                  |                |               |                 |               | LEPROTL1 |             | 0.97980     |
|  |                |                  |                |               |                 |               | PLCB4    |             | 0.88880     |
|  |                |                  |                |               |                 |               | ASTN1    |             | 0.92411     |
|  |                |                  |                |               |                 |               | DDX25    |             | 0.90597     |
|  |                |                  |                |               |                 |               | ENDOD1   |             | 0.94799     |
|  |                |                  |                |               |                 |               | GNAI1    |             | 0.98485     |
|  |                |                  |                |               |                 |               | GPR158   |             | 0.89952     |

|  | early_above_70 | early_aged_60_70 | early_below_55 | late_above_70 | late_aged_60_70 | late_below_55 | Probe ID | Description | Correlation |
|--|----------------|------------------|----------------|---------------|-----------------|---------------|----------|-------------|-------------|
|  |                |                  |                |               |                 |               | CCNH     |             | 0.97980     |
|  |                |                  |                |               |                 |               | HES1     |             | 0.94996     |
|  |                |                  |                |               |                 |               | SRP9     |             | 0.99056     |
|  |                |                  |                |               |                 |               | BAG2     |             | 0.89881     |
|  |                |                  |                |               |                 |               | MED4     |             | 0.98589     |
|  |                |                  |                |               |                 |               | GRIK3    |             | 0.93547     |
|  |                |                  |                |               |                 |               | RBKS     |             | 0.79478     |
|  |                |                  |                |               |                 |               | ZNF443   |             | 0.97574     |

|  | early_above_70 | early_aged_60_70 | early_below_55 | late_above_70 | late_aged_60_70 | late_below_55 | Probe ID | Description | Correlation |
|--|----------------|------------------|----------------|---------------|-----------------|---------------|----------|-------------|-------------|
|  |                |                  |                |               |                 |               | DPYSL5   |             | 0.97678     |
|  |                |                  |                |               |                 |               | PDE1C    |             | 0.78216     |
|  |                |                  |                |               |                 |               | UGT2B4   |             | 0.98346     |
|  |                |                  |                |               |                 |               | INHBC    |             | 0.92146     |
|  |                |                  |                |               |                 |               | ABCG5    |             | 0.99929     |
|  |                |                  |                |               |                 |               | CCDC83   |             | 0.76978     |
|  |                |                  |                |               |                 |               | FASLG    |             | 0.89320     |
|  |                |                  |                |               |                 |               | GATA4    |             | 0.92354     |
|  |                |                  |                |               |                 |               | GHRHR    |             | 0.99879     |
|  |                |                  |                |               |                 |               | GRIA2    |             | 0.87746     |
|  |                |                  |                |               |                 |               | KIF25    |             | 0.78216     |
|  |                |                  |                |               |                 |               | MLANA    |             | 0.93653     |
|  |                |                  |                |               |                 |               | PCSK2    |             | 0.78216     |
|  |                |                  |                |               |                 |               | PROZ     |             | 0.99417     |
|  |                |                  |                |               |                 |               | RS1      |             | 0.99418     |
|  |                |                  |                |               |                 |               | SCHIP1   |             | 0.78216     |
|  |                |                  |                |               |                 |               | SEZ6L    |             | 0.99106     |
|  |                |                  |                |               |                 |               | SOX21    |             | 0.98956     |
|  |                |                  |                |               |                 |               | TPH1     |             | 0.78216     |
|  |                |                  |                |               |                 |               | TREH     |             | 0.98565     |
|  |                |                  |                |               |                 |               | UNC93A   |             | 0.90462     |
|  |                |                  |                |               |                 |               | XG       |             | 0.78216     |
|  |                |                  |                |               |                 |               | CHRM5    |             | 0.99732     |
|  |                |                  |                |               |                 |               | FRMPD4   |             | 0.99898     |
|  |                |                  |                |               |                 |               | SNX32    |             | 0.93223     |
|  |                |                  |                |               |                 |               | DUSP27   |             | 0.91360     |
|  |                |                  |                |               |                 |               | GPR37L1  |             | 0.78216     |
|  |                |                  |                |               |                 |               | SLC4A9   |             | 0.92301     |
|  |                |                  |                |               |                 |               | TM4SF19  |             | 0.88837     |

|  | early_above_70 | early_aged_60_70 | early_below_55 | late_above_70 | late_aged_60_70 | late_below_55 | Probe ID | Description | Correlation |
|--|----------------|------------------|----------------|---------------|-----------------|---------------|----------|-------------|-------------|
|  |                |                  |                |               |                 |               | CACNA1I  |             | 0.96683     |
|  |                |                  |                |               |                 |               | ENKUR    |             | 0.89388     |
|  |                |                  |                |               |                 |               | FLRT3    |             | 0.90744     |
|  |                |                  |                |               |                 |               | DKK2     |             | 0.98161     |
|  |                |                  |                |               |                 |               | ITIH2    |             | 0.96021     |
|  |                |                  |                |               |                 |               | OCA2     |             | 0.89812     |
|  |                |                  |                |               |                 |               | ZNF365   |             | 0.86005     |
|  |                |                  |                |               |                 |               | NELL2    |             | 0.89624     |
|  |                |                  |                |               |                 |               | GJB3     |             | 0.87489     |
|  |                |                  |                |               |                 |               | UPK2     |             | 0.95669     |



|  | early_above_70 | early_aged_60_70 | early_below_55 | late_above_70 | late_aged_60_70 | late_below_55 | Probe ID | Description | Correlation |
|--|----------------|------------------|----------------|---------------|-----------------|---------------|----------|-------------|-------------|
|  |                |                  |                |               |                 |               | CACNA2D2 |             | 0.99357     |
|  |                |                  |                |               |                 |               | IGF1R    |             | 0.99648     |
|  |                |                  |                |               |                 |               | PLEKHB2  |             | 0.96129     |
|  |                |                  |                |               |                 |               | TCTA     |             | 0.96702     |
|  |                |                  |                |               |                 |               | TRIM5    |             | 0.98906     |
|  |                |                  |                |               |                 |               | TP53INP2 |             | 0.98099     |
|  |                |                  |                |               |                 |               | PACSIN2  |             | 0.98809     |
|  |                |                  |                |               |                 |               | SLC2A9   |             | 0.98878     |
|  |                |                  |                |               |                 |               | STEAP4   |             | 0.94575     |
|  |                |                  |                |               |                 |               | XK       |             | 0.94937     |
|  |                |                  |                |               |                 |               | ADAMTS9  |             | 0.98614     |
|  |                |                  |                |               |                 |               | C11orf54 |             | 0.89457     |
|  |                |                  |                |               |                 |               | CADM4    |             | 0.99238     |
|  |                |                  |                |               |                 |               | SRL      |             | 0.96233     |

|  | early_above_70 | early_aged_60_70 | early_below_55 | late_above_70 | late_aged_60_70 | late_below_55 | Probe ID | Description | Correlation |
|--|----------------|------------------|----------------|---------------|-----------------|---------------|----------|-------------|-------------|
|  |                |                  |                |               |                 |               | ERI1     |             | 0.94050     |
|  |                |                  |                |               |                 |               | FHOD3    |             | 0.89621     |
|  |                |                  |                |               |                 |               | GRAP2    |             | 0.89824     |
|  |                |                  |                |               |                 |               | RPL17    |             | 0.97167     |
|  |                |                  |                |               |                 |               | FAM186B  |             | 0.97796     |
|  |                |                  |                |               |                 |               | FECH     |             | 0.78314     |
|  |                |                  |                |               |                 |               | FGF7     |             | 0.93030     |
|  |                |                  |                |               |                 |               | GALNT12  |             | 0.85779     |
|  |                |                  |                |               |                 |               | LAMA1    |             | 0.96687     |
|  |                |                  |                |               |                 |               | SYTL5    |             | 0.79811     |
|  |                |                  |                |               |                 |               | ESCO2    |             | 0.82877     |
|  |                |                  |                |               |                 |               | IQCB1    |             | 0.74985     |
|  |                |                  |                |               |                 |               | KLHL32   |             | 0.79796     |
|  |                |                  |                |               |                 |               | MYC      |             | 0.87320     |

II - Rubicz et al. data

|  | local.below.55 | local.aged.60.70 | local.above.70 | regional.below.... | regional.aged.6... | regional.above.... | Probe ID | Description | Correlation |
|--|----------------|------------------|----------------|--------------------|--------------------|--------------------|----------|-------------|-------------|
|  |                |                  |                |                    |                    |                    | FRAS1    |             | 0.93224     |
|  |                |                  |                |                    |                    |                    | KIF3B    |             | 0.90459     |
|  |                |                  |                |                    |                    |                    | VEGFC    |             | 0.98521     |

|  | local.below.55 | local.aged.60.70 | local.above.70 | regional.below.... | regional.aged.6... | regional.above.... | Probe ID | Description | Correlation |
|--|----------------|------------------|----------------|--------------------|--------------------|--------------------|----------|-------------|-------------|
|  |                |                  |                |                    |                    |                    | CLEC16A  |             | 0.98283     |
|  |                |                  |                |                    |                    |                    | HES5     |             | 0.98283     |

|  | local.below.55 | local.aged.60.70 | local.above.70 | regional.below.... | regional.aged.6... | regional.above.... | Probe ID | Description | Correlation |
|--|----------------|------------------|----------------|--------------------|--------------------|--------------------|----------|-------------|-------------|
|  |                |                  |                |                    |                    |                    | GJA1     |             | 0.97434     |
|  |                |                  |                |                    |                    |                    | ITGA10   |             | 0.99593     |
|  |                |                  |                |                    |                    |                    | TUBA4A   |             | 0.95881     |

|  | local.below.55 | local.aged.60.70 | local.above.70 | regional.below.... | regional.aged.6... | regional.above.... | Probe ID | Description | Correlation |
|--|----------------|------------------|----------------|--------------------|--------------------|--------------------|----------|-------------|-------------|
|  |                |                  |                |                    |                    |                    | BCL2     |             | 0.98444     |
|  |                |                  |                |                    |                    |                    | KIFAP3   |             | 0.98309     |
|  |                |                  |                |                    |                    |                    | LAMC3    |             | 0.98608     |
|  |                |                  |                |                    |                    |                    | RB1      |             | 0.98573     |

|  | local.below.55 | local.aged.60.70 | local.above.70 | regional.below.... | regional.aged.6... | regional.above.... | Probe ID | Description | Correlation |
|--|----------------|------------------|----------------|--------------------|--------------------|--------------------|----------|-------------|-------------|
|  |                |                  |                |                    |                    |                    | EGFR     |             | 0.96710     |
|  |                |                  |                |                    |                    |                    | KIF21B   |             | 0.96710     |

|  | local.below.55 | local.aged.60.70 | local.above.70 | regional.below.... | regional.aged.6... | regional.above.... | Probe ID | Description | Correlation |
|--|----------------|------------------|----------------|--------------------|--------------------|--------------------|----------|-------------|-------------|
|  |                |                  |                |                    |                    |                    | MAP2     |             | 1.00000     |

|  | local.below.55 | local.aged.60.70 | local.above.70 | regional.below.... | regional.aged.6... | regional.above.... | Probe ID | Description | Correlation |
|--|----------------|------------------|----------------|--------------------|--------------------|--------------------|----------|-------------|-------------|
|  |                |                  |                |                    |                    |                    | FCHO2    |             | 0.98727     |
|  |                |                  |                |                    |                    |                    | TCF4     |             | 0.98727     |

|  | local.below.55 | local.aged.60.70 | local.above.70 | regional.below.... | regional.aged.6... | regional.above.... | Probe ID | Description | Correlation |
|--|----------------|------------------|----------------|--------------------|--------------------|--------------------|----------|-------------|-------------|
|  |                |                  |                |                    |                    |                    | ITGA6    |             | 0.99464     |
|  |                |                  |                |                    |                    |                    | NOTCH1   |             | 0.99464     |

|  | local.below.55 | local.aged.60.70 | local.above.70 | regional.below.... | regional.aged.6... | regional.above.... | Probe ID | Description | Correlation |
|--|----------------|------------------|----------------|--------------------|--------------------|--------------------|----------|-------------|-------------|
|  |                |                  |                |                    |                    |                    | CDH11    |             | 0.98818     |
|  |                |                  |                |                    |                    |                    | COCH     |             | 0.91429     |
|  |                |                  |                |                    |                    |                    | COL8A1   |             | 0.89229     |

|  | local.below.55 | local.aged.60.70 | local.above.70 | regional.below.... | regional.aged.6... | regional.above.... | Probe ID | Description | Correlation |
|--|----------------|------------------|----------------|--------------------|--------------------|--------------------|----------|-------------|-------------|
|  |                |                  |                |                    |                    |                    | ANK2     |             | 0.98122     |
|  |                |                  |                |                    |                    |                    | ANXA1    |             | 0.74328     |
|  |                |                  |                |                    |                    |                    | CDKN1A   |             | 0.91938     |
|  |                |                  |                |                    |                    |                    | COL14A1  |             | 0.92732     |
|  |                |                  |                |                    |                    |                    | DYNC1H1  |             | 0.94493     |
|  |                |                  |                |                    |                    |                    | FN1      |             | 0.90043     |
|  |                |                  |                |                    |                    |                    | HES4     |             | 0.97251     |
|  |                |                  |                |                    |                    |                    | HIF1A    |             | 0.95195     |
|  |                |                  |                |                    |                    |                    | KIF3A    |             | 0.91419     |

|  | local.below.55 | local.aged.60.70 | local.above.70 | regional.below.... | regional.aged.6... | regional.above.... | Probe ID | Description | Correlation |
|--|----------------|------------------|----------------|--------------------|--------------------|--------------------|----------|-------------|-------------|
|  |                |                  |                |                    |                    |                    | ITGA8    |             | 0.97234     |
|  |                |                  |                |                    |                    |                    | MYO1F    |             | 0.97790     |
|  |                |                  |                |                    |                    |                    | TIP3     |             | 0.95555     |

|  | local.below.55 | local.aged.60.70 | local.above.70 | regional.below.... | regional.aged.6... | regional.above.... | Probe ID | Description | Correlation |
|--|----------------|------------------|----------------|--------------------|--------------------|--------------------|----------|-------------|-------------|
|  |                |                  |                |                    |                    |                    | ITGB2    |             | 1.00000     |

|  | local.below.55 | local.aged.60.70 | local.above.70 | regional.below.... | regional.aged.6... | regional.above.... | Probe ID | Description | Correlation |
|--|----------------|------------------|----------------|--------------------|--------------------|--------------------|----------|-------------|-------------|
|  |                |                  |                |                    |                    |                    | CDHR2    |             | 0.91421     |
|  |                |                  |                |                    |                    |                    | HEY1     |             | 0.91499     |
|  |                |                  |                |                    |                    |                    | ICAM1    |             | 0.80495     |
|  |                |                  |                |                    |                    |                    | ICAM5    |             | 0.98612     |
|  |                |                  |                |                    |                    |                    | MATN1    |             | 0.92201     |

|  | local.below.55 | local.aged.60.70 | local.above.70 | regional.below.... | regional.aged.6... | regional.above.... | Probe ID | Description | Correlation |
|--|----------------|------------------|----------------|--------------------|--------------------|--------------------|----------|-------------|-------------|
|  |                |                  |                |                    |                    |                    | DNMT1    |             | 0.97973     |
|  |                |                  |                |                    |                    |                    | VEGFA    |             | 0.97973     |

|  | local.below.55 | local.aged.60.70 | local.above.70 | regional.below.... | regional.aged.6... | regional.above.... | Probe ID | Description | Correlation |
|--|----------------|------------------|----------------|--------------------|--------------------|--------------------|----------|-------------|-------------|
|  |                |                  |                |                    |                    |                    | LAMA1    |             | 1.00000     |

|  | local.below.55 | local.aged.60.70 | local.above.70 | regional.below.... | regional.aged.6... | regional.above.... | Probe ID | Description | Correlation |
|--|----------------|------------------|----------------|--------------------|--------------------|--------------------|----------|-------------|-------------|
|  |                |                  |                |                    |                    |                    | TP63     |             | 1.00000     |

|  | local.below.55 | local.aged.60.70 | local.above.70 | regional.below.... | regional.aged.6... | regional.above.... | Probe ID | Description | Correlation |
|--|----------------|------------------|----------------|--------------------|--------------------|--------------------|----------|-------------|-------------|
|  |                |                  |                |                    |                    |                    | CDHR5    |             | 0.95959     |
|  |                |                  |                |                    |                    |                    | CDK12    |             | 0.67174     |
|  |                |                  |                |                    |                    |                    | FLG      |             | 0.90666     |
|  |                |                  |                |                    |                    |                    | FLNB     |             | 0.86871     |
|  |                |                  |                |                    |                    |                    | GATA1    |             | 0.93989     |
|  |                |                  |                |                    |                    |                    | HDAC1    |             | 0.95630     |
|  |                |                  |                |                    |                    |                    | HEY2     |             | 0.86966     |
|  |                |                  |                |                    |                    |                    | KIF21A   |             | 0.93829     |
|  |                |                  |                |                    |                    |                    | MYO1D    |             | 0.98597     |

|  | local.below.55 | local.aged.60.70 | local.above.70 | regional.below.... | regional.aged.6... | regional.above.... | Probe ID | Description | Correlation |
|--|----------------|------------------|----------------|--------------------|--------------------|--------------------|----------|-------------|-------------|
|  |                |                  |                |                    |                    |                    | SNAI2    |             | 1.00000     |

|  | local.below.55 | local.aged.60.70 | local.above.70 | regional.below.... | regional.aged.6... | regional.above.... | Probe ID | Description | Correlation |
|--|----------------|------------------|----------------|--------------------|--------------------|--------------------|----------|-------------|-------------|
|  |                |                  |                |                    |                    |                    | HEYL     |             | 0.89301     |
|  |                |                  |                |                    |                    |                    | ITGAV    |             | 0.97187     |
|  |                |                  |                |                    |                    |                    | MATN2    |             | 0.94608     |

|  | local.below.55 | local.aged.60.70 | local.above.70 | regional.below.... | regional.aged.6... | regional.above.... | Probe ID | Description | Correlation |
|--|----------------|------------------|----------------|--------------------|--------------------|--------------------|----------|-------------|-------------|
|  |                |                  |                |                    |                    |                    | EP300    |             | 1.00000     |

|  | local.below.55 | local.aged.60.70 | local.above.70 | regional.below.... | regional.aged.6... | regional.above.... | Probe ID | Description | Correlation |
|--|----------------|------------------|----------------|--------------------|--------------------|--------------------|----------|-------------|-------------|
|  |                |                  |                |                    |                    |                    | DST      |             | 0.87214     |
|  |                |                  |                |                    |                    |                    | FBN1     |             | 0.86443     |
|  |                |                  |                |                    |                    |                    | KIF18    |             | 0.92638     |

|  | local.below.55 | local.aged.60.70 | local.above.70 | regional.below.... | regional.aged.6... | regional.above.... | Probe ID | Description | Correlation |
|--|----------------|------------------|----------------|--------------------|--------------------|--------------------|----------|-------------|-------------|
|  |                |                  |                |                    |                    |                    | ITGA1    |             | 0.98670     |
|  |                |                  |                |                    |                    |                    | ZEB2     |             | 0.98670     |

|  | local.below.55 | local.aged.60.70 | local.above.70 | regional.below.... | regional.aged.6... | regional.above.... | Probe ID | Description | Correlation |
|--|----------------|------------------|----------------|--------------------|--------------------|--------------------|----------|-------------|-------------|
|  |                |                  |                |                    |                    |                    | CDH1     |             | 0.84959     |
|  |                |                  |                |                    |                    |                    | HES1     |             | 0.85721     |
|  |                |                  |                |                    |                    |                    | ITGB8    |             | 0.95901     |
|  |                |                  |                |                    |                    |                    | NTN4     |             | 0.91995     |

|  | local.below.55 | local.aged.60.70 | local.above.70 | regional.below.... | regional.aged.6... | regional.above.... | Probe ID | Description | Correlation |
|--|----------------|------------------|----------------|--------------------|--------------------|--------------------|----------|-------------|-------------|
|  |                |                  |                |                    |                    |                    | CDH4     |             | 0.68749     |
|  |                |                  |                |                    |                    |                    | GDF5     |             | 0.50725     |
|  |                |                  |                |                    |                    |                    | HIP1     |             | 0.92830     |
|  |                |                  |                |                    |                    |                    | KIF5A    |             | 0.94311     |
|  |                |                  |                |                    |                    |                    | LIN7A    |             | 0.77536     |
|  |                |                  |                |                    |                    |                    | MYO7A    |             | 0.50430     |
|  |                |                  |                |                    |                    |                    | TWIST1   |             | 0.88392     |

|  | local.below.55 | local.aged.60.70 | local.above.70 | regional.below.... | regional.aged.6... | regional.above.... | Probe ID | Description | Correlation |
|--|----------------|------------------|----------------|--------------------|--------------------|--------------------|----------|-------------|-------------|
|  |                |                  |                |                    |                    |                    | CDH15    |             | 0.94035     |
|  |                |                  |                |                    |                    |                    | CRB2     |             | 0.88536     |
|  |                |                  |                |                    |                    |                    | CREBBP   |             | 0.90811     |
|  |                |                  |                |                    |                    |                    | CTNNB1   |             | 0.77354     |
|  |                |                  |                |                    |                    |                    | ERBB2    |             | 0.94334     |
|  |                |                  |                |                    |                    |                    | ESR1     |             | 0.85636     |
|  |                |                  |                |                    |                    |                    | LGALS3   |             | 0.48112     |
|  |                |                  |                |                    |                    |                    | PLEC     |             | 0.85044     |

|  | local.below.55 | local.aged.60.70 | local.above.70 | regional.below.... | regional.aged.6... | regional.above.... | Probe ID | Description | Correlation |
|--|----------------|------------------|----------------|--------------------|--------------------|--------------------|----------|-------------|-------------|
|  |                |                  |                |                    |                    |                    | MAP7     |             | 1.00000     |

|  | local.below.55 | local.aged.60.70 | local.above.70 | regional.below.... | regional.aged.6... | regional.above.... | Probe ID | Description | Correlation |
|--|----------------|------------------|----------------|--------------------|--------------------|--------------------|----------|-------------|-------------|
|  |                |                  |                |                    |                    |                    | CDH26    |             | 0.79244     |
|  |                |                  |                |                    |                    |                    | ERG      |             | 0.98604     |
|  |                |                  |                |                    |                    |                    | LAMC2    |             | 0.95579     |
|  |                |                  |                |                    |                    |                    | TFAP2A   |             | 0.88205     |
|  |                |                  |                |                    |                    |                    | TNN      |             | 0.93308     |
|  |                |                  |                |                    |                    |                    | WWOX     |             | 0.91548     |

|  | local.below.55 | local.aged.60.70 | local.above.70 | regional.below.... | regional.aged.6... | regional.above.... | Probe ID | Description | Correlation |
|--|----------------|------------------|----------------|--------------------|--------------------|--------------------|----------|-------------|-------------|
|  |                |                  |                |                    |                    |                    | CALD1    |             | 0.96241     |
|  |                |                  |                |                    |                    |                    | COL4A4   |             | 0.92608     |
|  |                |                  |                |                    |                    |                    | SMAD3    |             | 0.94017     |

|  | local.below.55 | local.aged.60.70 | local.above.70 | regional.below.... | regional.aged.6... | regional.above.... | Probe ID | Description | Correlation |
|--|----------------|------------------|----------------|--------------------|--------------------|--------------------|----------|-------------|-------------|
|  |                |                  |                |                    |                    |                    | CTNNA2   |             | 0.94178     |
|  |                |                  |                |                    |                    |                    | FGF9     |             | 0.85542     |
|  |                |                  |                |                    |                    |                    | HDAC6    |             | 0.76529     |
|  |                |                  |                |                    |                    |                    | MYC      |             | 0.89441     |
|  |                |                  |                |                    |                    |                    | NPNT     |             | 0.95056     |

|  | local.below.55 | local.aged.60.70 | local.above.70 | regional.below.... | regional.aged.6... | regional.above.... | Probe ID | Description | Correlation |
|--|----------------|------------------|----------------|--------------------|--------------------|--------------------|----------|-------------|-------------|
|  |                |                  |                |                    |                    |                    | FGF1     |             | 0.99370     |
|  |                |                  |                |                    |                    |                    | MAPRE3   |             | 0.99370     |

|  | local.below.55 | local.aged.60.70 | local.above.70 | regional.below.... | regional.aged.6... | regional.above.... | Probe ID | Description | Correlation |
|--|----------------|------------------|----------------|--------------------|--------------------|--------------------|----------|-------------|-------------|
|  |                |                  |                |                    |                    |                    | CDK19    |             | 0.96837     |
|  |                |                  |                |                    |                    |                    | FGF12    |             | 0.86019     |
|  |                |                  |                |                    |                    |                    | MZT1     |             | 0.83596     |

|  | local.below.55 | local.aged.60.70 | local.above.70 | regional.below.... | regional.aged.6... | regional.above.... | Probe ID | Description | Correlation |
|--|----------------|------------------|----------------|--------------------|--------------------|--------------------|----------|-------------|-------------|
|  |                |                  |                |                    |                    |                    | COL6A2   |             | 0.81924     |
|  |                |                  |                |                    |                    |                    | MMP7     |             | 0.81924     |
